# Supplementary material
Source: PubMed Central journal article supplement (PMC3727232)
Supplement: NIHMS474986-supplement-1.pdf [file NIHMS474986-supplement-1.pdf]

## Supplementary information for

### Whole-genome sequencing identifies genetic alterations in pediatric low-grade gliomas

Jinghui Zhang<sup>1</sup>, Gang Wu<sup>1</sup>, Claudia P. Miller<sup>2</sup>, Ruth G. Tatevossian<sup>3</sup>, James D. Dalton<sup>3</sup>, Bo Tang<sup>3</sup>, Wilda Orisme<sup>3</sup>, Chandanamali Punchihewa<sup>3</sup>, Matthew Parker<sup>1</sup>, Ibrahim Qaddoumi<sup>4</sup>, Fredrick A. Boop<sup>5</sup>, Charles Lu<sup>6</sup>, Cyriac Kandoth<sup>6</sup>, Li Ding<sup>7</sup>, Ryan Lee<sup>3</sup>, Robert Huether<sup>1</sup>, Xiang Chen<sup>1</sup>, Erin Hedlund<sup>1</sup>, Panduka Nagahawatte<sup>1</sup>, Michael Rusch<sup>1</sup>, Kristy Boggs<sup>8</sup>, Jinjun Cheng<sup>3</sup>, Jared Becksfort<sup>1</sup>, Jing Ma<sup>3</sup>, Guangchun Song<sup>3</sup>, Yongjin Li<sup>1</sup>, Lei Wei<sup>3</sup>, Jianmin Wang<sup>9</sup>, Sheila Shurtleff<sup>3</sup>, John Easton<sup>8</sup>, David Zhao<sup>1</sup>, Robert S. Fulton<sup>6</sup>, Lucinda L. Fulton<sup>6</sup>, David J. Dooling<sup>6</sup>, Bhavin Vadodaria<sup>8</sup>, Heather L. Mulder<sup>8</sup>, Chunlao Tang<sup>1</sup>, Kerri Ochoa<sup>6</sup>, Charles G. Mullighan<sup>3</sup>, Amar Gajjar<sup>4</sup>, Richard Kriwacki<sup>10</sup>, Denise Sheer<sup>11</sup>, Richard J. Gilbertson<sup>2</sup>, Elaine R. Mardis<sup>6</sup>, Richard K. Wilson<sup>6</sup>, James R. Downing<sup>3</sup>, Suzanne J. Baker<sup>2</sup>, David W. Ellison<sup>3</sup>; for the St. Jude Children's Research Hospital – Washington University Pediatric Cancer Genome Project.

1. Department of Computational Biology, St. Jude Children's Research Hospital, Memphis, TN 38105, USA
2. Department of Developmental Neurobiology, St. Jude Children's Research Hospital, Memphis, TN 38105, USA
3. Department of Pathology, St. Jude Children's Research Hospital, Memphis, TN 38105, USA
4. Department of Oncology, St. Jude Children's Research Hospital, Memphis, TN 38105, USA
5. Department of Surgery, St. Jude Children's Research Hospital, Memphis, TN 38105, USA

6. The Genome Institute, Washington University School of Medicine, St Louis, MO 63108, USA
7. Department of Genetics, Washington University School of Medicine, St Louis, MO 63108, USA
8. Pediatric Cancer Genome Project Laboratory, St. Jude Children's Research Hospital, Memphis, TN 38105, USA
9. Hartwell Center for Biotechnology & Bioinformatics, St. Jude Children's Research Hospital, Memphis, TN 38105, USA
10. Department of Structural Biology, St. Jude Children's Research Hospital, Memphis, TN 38105, USA
11. Queen Mary University of London Centre for Neuroscience and Trauma, The Blizard Institute, Barts and the London School of Medicine and Dentistry, London E1 2AT, UK

Corresponding author – Dr. David Ellison MD PhD, Dept. of Pathology, St. Jude Children's Research Hospital, 262 Danny Thomas Place, Memphis, TN 38105, USA.

tel: 001-901-595-5438; fax: 001-901-595-3100

e-mail: david.ellison@stjude.org

## TABLE OF CONTENTS

|                                                                                                                                                                 |    |
|-----------------------------------------------------------------------------------------------------------------------------------------------------------------|----|
| <b>SUPPLEMENTARY FIGURES</b>                                                                                                                                    | 5  |
| Supplementary Figure 1 Study patient cohort                                                                                                                     | 5  |
| Supplementary Figure 2 Sequence Coverage                                                                                                                        | 7  |
| Supplementary Figure 3 CIRCOS plots of 39 tumors analyzed by WGS                                                                                                | 8  |
| Supplementary Figure 4 Fusion of <i>ST6GAL1</i> 5' UTR to <i>WHSC1</i> in SJLGG039                                                                              | 16 |
| Supplementary Figure 5 SVs and CNVs identified for SJLGG038                                                                                                     | 17 |
| Supplementary Figure 6 Complex rearrangement involving 5 SVs and 4 genomic segments and spanning a 21.5Mb region on chromosome 8 in SJLGG033                    | 19 |
| Supplementary Figure 7 Complex rearrangement resulting in formation of a <i>MYB</i> episome in SJLGG035                                                         | 21 |
| Supplementary Figure 8 Translocation of 31Mb segment from chromosome 6 to chromosome 5 producing an in-frame fusion of <i>MYB</i> and <i>PCDHGA</i> in SJLGG005 | 23 |
| Supplementary Figure 9 Sanger chromatogram for SJLGG001225 centered on the <i>NF1</i> W571* locus                                                               | 24 |
| Supplementary Figure 10 Copy number heatmaps generated for WGS tumor series and non-WGS tumors using SNP array data                                             | 25 |
| Supplementary Figure 11 Subclonal multi-chromosome copy number alterations (CNAs) detected by both WGS and SNP array                                            | 27 |
| Supplementary Figure 12 Fusions between <i>FGFR1</i> and <i>TACC1</i> and <i>FGFR3</i> and <i>TACC3</i>                                                         | 28 |
| Supplementary Figure 13 <i>MYB</i> rearrangements identified by WGS ± mRNA-seq                                                                                  | 30 |
| Supplementary Figure 14 Gene expression profiling using arrays and mRNA-seq                                                                                     | 32 |
| Supplementary Figure 15 TKD-duplicated <i>FGFR1</i> proteins                                                                                                    | 35 |
| <b>SUPPLEMENTARY TABLES</b>                                                                                                                                     | 38 |
| Supplementary Table 1 Coverage and mapping status of WGS data                                                                                                   | 38 |
| Supplementary Table 2 Summary of somatic sequence mutations, somatic SVs and somatic CNVs identified in 39 LGG cases analyzed by WGS                            | 39 |
| Supplementary Table 3 Comparison of coverage and somatic coding mutation detection by exome sequencing and WGS                                                  | 40 |
| Supplementary Table 4 Clinical, pathological and genetic abnormalities of all 151 tumors in this study                                                          | 41 |

|                                                                                                                                    |    |
|------------------------------------------------------------------------------------------------------------------------------------|----|
| Supplementary Table 5a Gene coding sequence mutations (including both substitution variants and indels) for tumors analyzed by WGS | 43 |
| Supplementary Table 5b Single nucleotide substitutions in conserved regions for tumors analyzed by WGS                             | 45 |
| Supplementary Table 5c Single nucleotide substitutions in non-repetitive regions for tumors analyzed by WGS                        | 47 |
| Supplementary Table 6 Copy number alterations identified in WGS data                                                               | 66 |
| Supplementary Table 7 Structural Variations identified in WGS samples                                                              | 67 |
| Supplementary Table 8 Non-silent SNVs and indels identified in tumor series 1 & 2                                                  | 69 |
| Supplementary Table 9 Significantly mutated gene analysis for mutations identified in tumors from series 1 and 2                   | 70 |
| Supplementary Table 10 WHO classification of LGGs and LGGNTs                                                                       | 71 |
| Supplementary Table 11a Primers for tier 1 non-silent SNV validation                                                               | 72 |
| Supplementary Table 11b Primers for SV analysis                                                                                    | 73 |
| Supplementary Table 11c Primers used to verify full-length cDNAs of FGFR1 duplications and the FGFR1:p.D623A mutant                | 74 |
| Supplementary Table 11d Gene list for recurrence screening of somatic SVs                                                          | 75 |
| Supplementary Table 11e iFISH probes                                                                                               | 76 |
| <b>SUPPLEMENTARY NOTE</b>                                                                                                          | 77 |
| Capture validation of SNVs in 16 tumors analyzed by WGS                                                                            | 77 |
| Analysis of background mutation rate (BMR) in 39 WGS cases                                                                         | 77 |
| Analysis of 7 LGG samples by both whole-genome and whole exome sequencing                                                          | 78 |
| Complex SVs in four cerebral tumors                                                                                                | 78 |
| Gene expression profiling of LGG tumors                                                                                            | 79 |
| Supplementary references                                                                                                           | 80 |



## Supplementary Figures

### Supplementary Figure 1. Study patient cohort

Three series of tumor samples made up the study cohort of 151 tumors from 149 patients. A discovery series of 39 tumors analyzed by whole genome sequencing (WGS) and 46 tumors analyzed by mRNA-seq (27 also studied by WGS) comprised Series 1. Series 2 consisted of 84 tumor samples representative of the entire disease, in which the frequency of non-silent somatic alterations detected by WGS was tested. Series 3 consisted of 28 non-cerebellar tumors without matching germline DNA samples.

#### Series 1: Next Generation Sequencing

*Whole Genome Sequencing (WGS) – 39 tumors from 38 patients\**

Pilocytic or pilomyxoid astrocytomas = 26, diffuse gliomas = 10(9)\*, PXA or glioneuronal tumors = 3

*mRNA-seq – 46 tumors from 44 patients§ (27 also with WGS)*

Pilocytic or pilomyxoid astrocytomas = 16, diffuse gliomas = 27(25)§, PXA or glioneuronal tumors = 3

*Total (WGS ± mRNA-seq or mRNA-seq only) – 58 tumors from 56 patients§*

Pilocytic or pilomyxoid astrocytomas = 27, diffuse gliomas = 27(25)§, PXA or glioneuronal tumors = 4

Tumor resection at diagnosis and at relapse for one\* or two§ patients

PXA = pleomorphic xanthoastrocytoma; PA = pilocytic astrocytoma; PMA = pilomyxoid astrocytoma

**Series 2:** 84 tumors from 83 patients, including 13 tumors from series 1, analyzed by high throughput sequencing, iFISH and RT-PCR to evaluate frequency of non-silent somatic aberrations detected by WGS  
 PAs / PMAs =54, diffuse gliomas =18, PXAs / GNTs =12

**Series 3:** 22 non-cerebellar tumors from 22 patients analyzed by iFISH and RT-PCR and included to augment those tumor types in which novel genetic aberrations were being detected by WGS  
 PAs / PMAs =12, diffuse gliomas =4, PXAs / GNTs =6

PXA = pleomorphic xanthoastrocytoma; PA = pilocytic astrocytoma; PMA = pilomyxoid astrocytoma; GNT = glioneuronal tumor

### Clinicopathological characteristics of study cohort patients

|                                    | Number of patients | Mean age at surgery: years (range) | Male:Female | Cerebral cortex | Diencephalon | Cerebellum | Brain stem | Spinal cord |
|------------------------------------|--------------------|------------------------------------|-------------|-----------------|--------------|------------|------------|-------------|
| Pilocytic / pilomyxoid astrocytoma | 92                 | 7.7 (0.5 - 18)                     | 45:47       | 10              | 29           | 38         | 10         | 5           |
| Diffuse glioma                     | 36                 | 7.2 (1 - 15)                       | 22:14       | 34              | 2            | 0          | 0          | 0           |
| Glioneuronal tumor / PXA           | 21                 | 10.3 (0.4 - 17)                    | 5:16        | 18              | 0            | 1          | 2          | 0           |
| Total                              | 149                |                                    |             |                 |              |            |            |             |

## Supplementary Figure 2. Sequence Coverage

Percentage of whole genome (top) and whole exome (bottom) covered by high-quality reads of 10x, 20x and 30x for each of 38 WGS tumor / germline sample pairs in the discovery set. Diagnostic tumor samples (solid circle), relapse tumor sample (solid square) and germline samples (open circle).

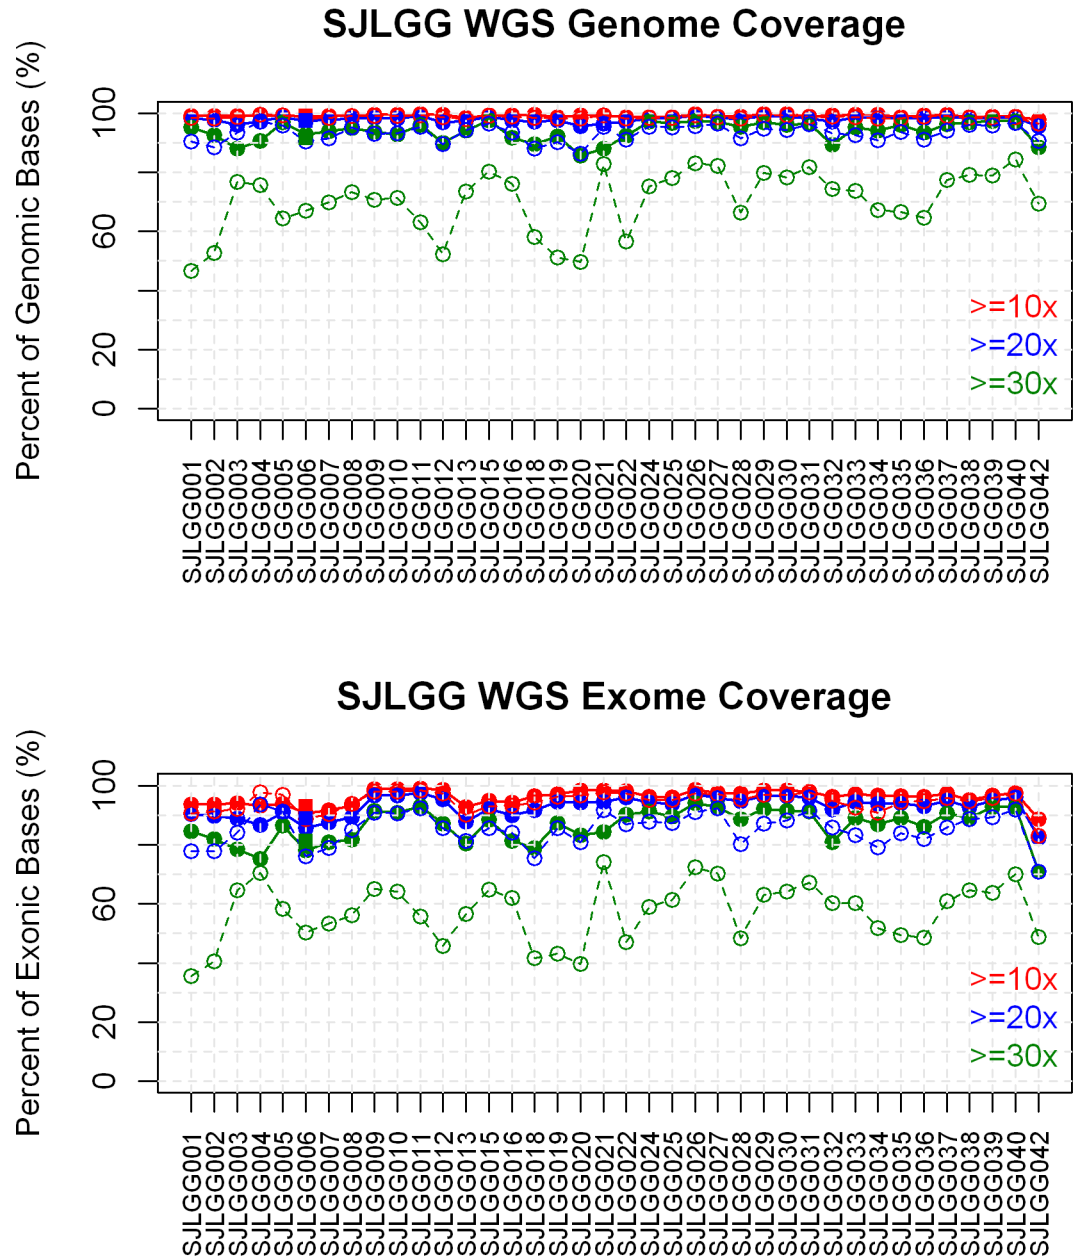

WGS = whole genome sequencing

### **Supplementary Figure 3. CIRCOS plots of 39 tumors analyzed by WGS**

CIRCOS plots depict structural genetic variants, including DNA copy number alterations, intra- chromosomal and inter-chromosomal translocations, and mutations.

Loss of heterozygosity – orange; amplification – red; deletion – blue

Sequence mutations in RefSeq genes: missense SNVs – brown; indels – red; splice site SNVs – blue

Genes at SV breakpoints: genes involved in in-frame fusions – pink; others – blue.



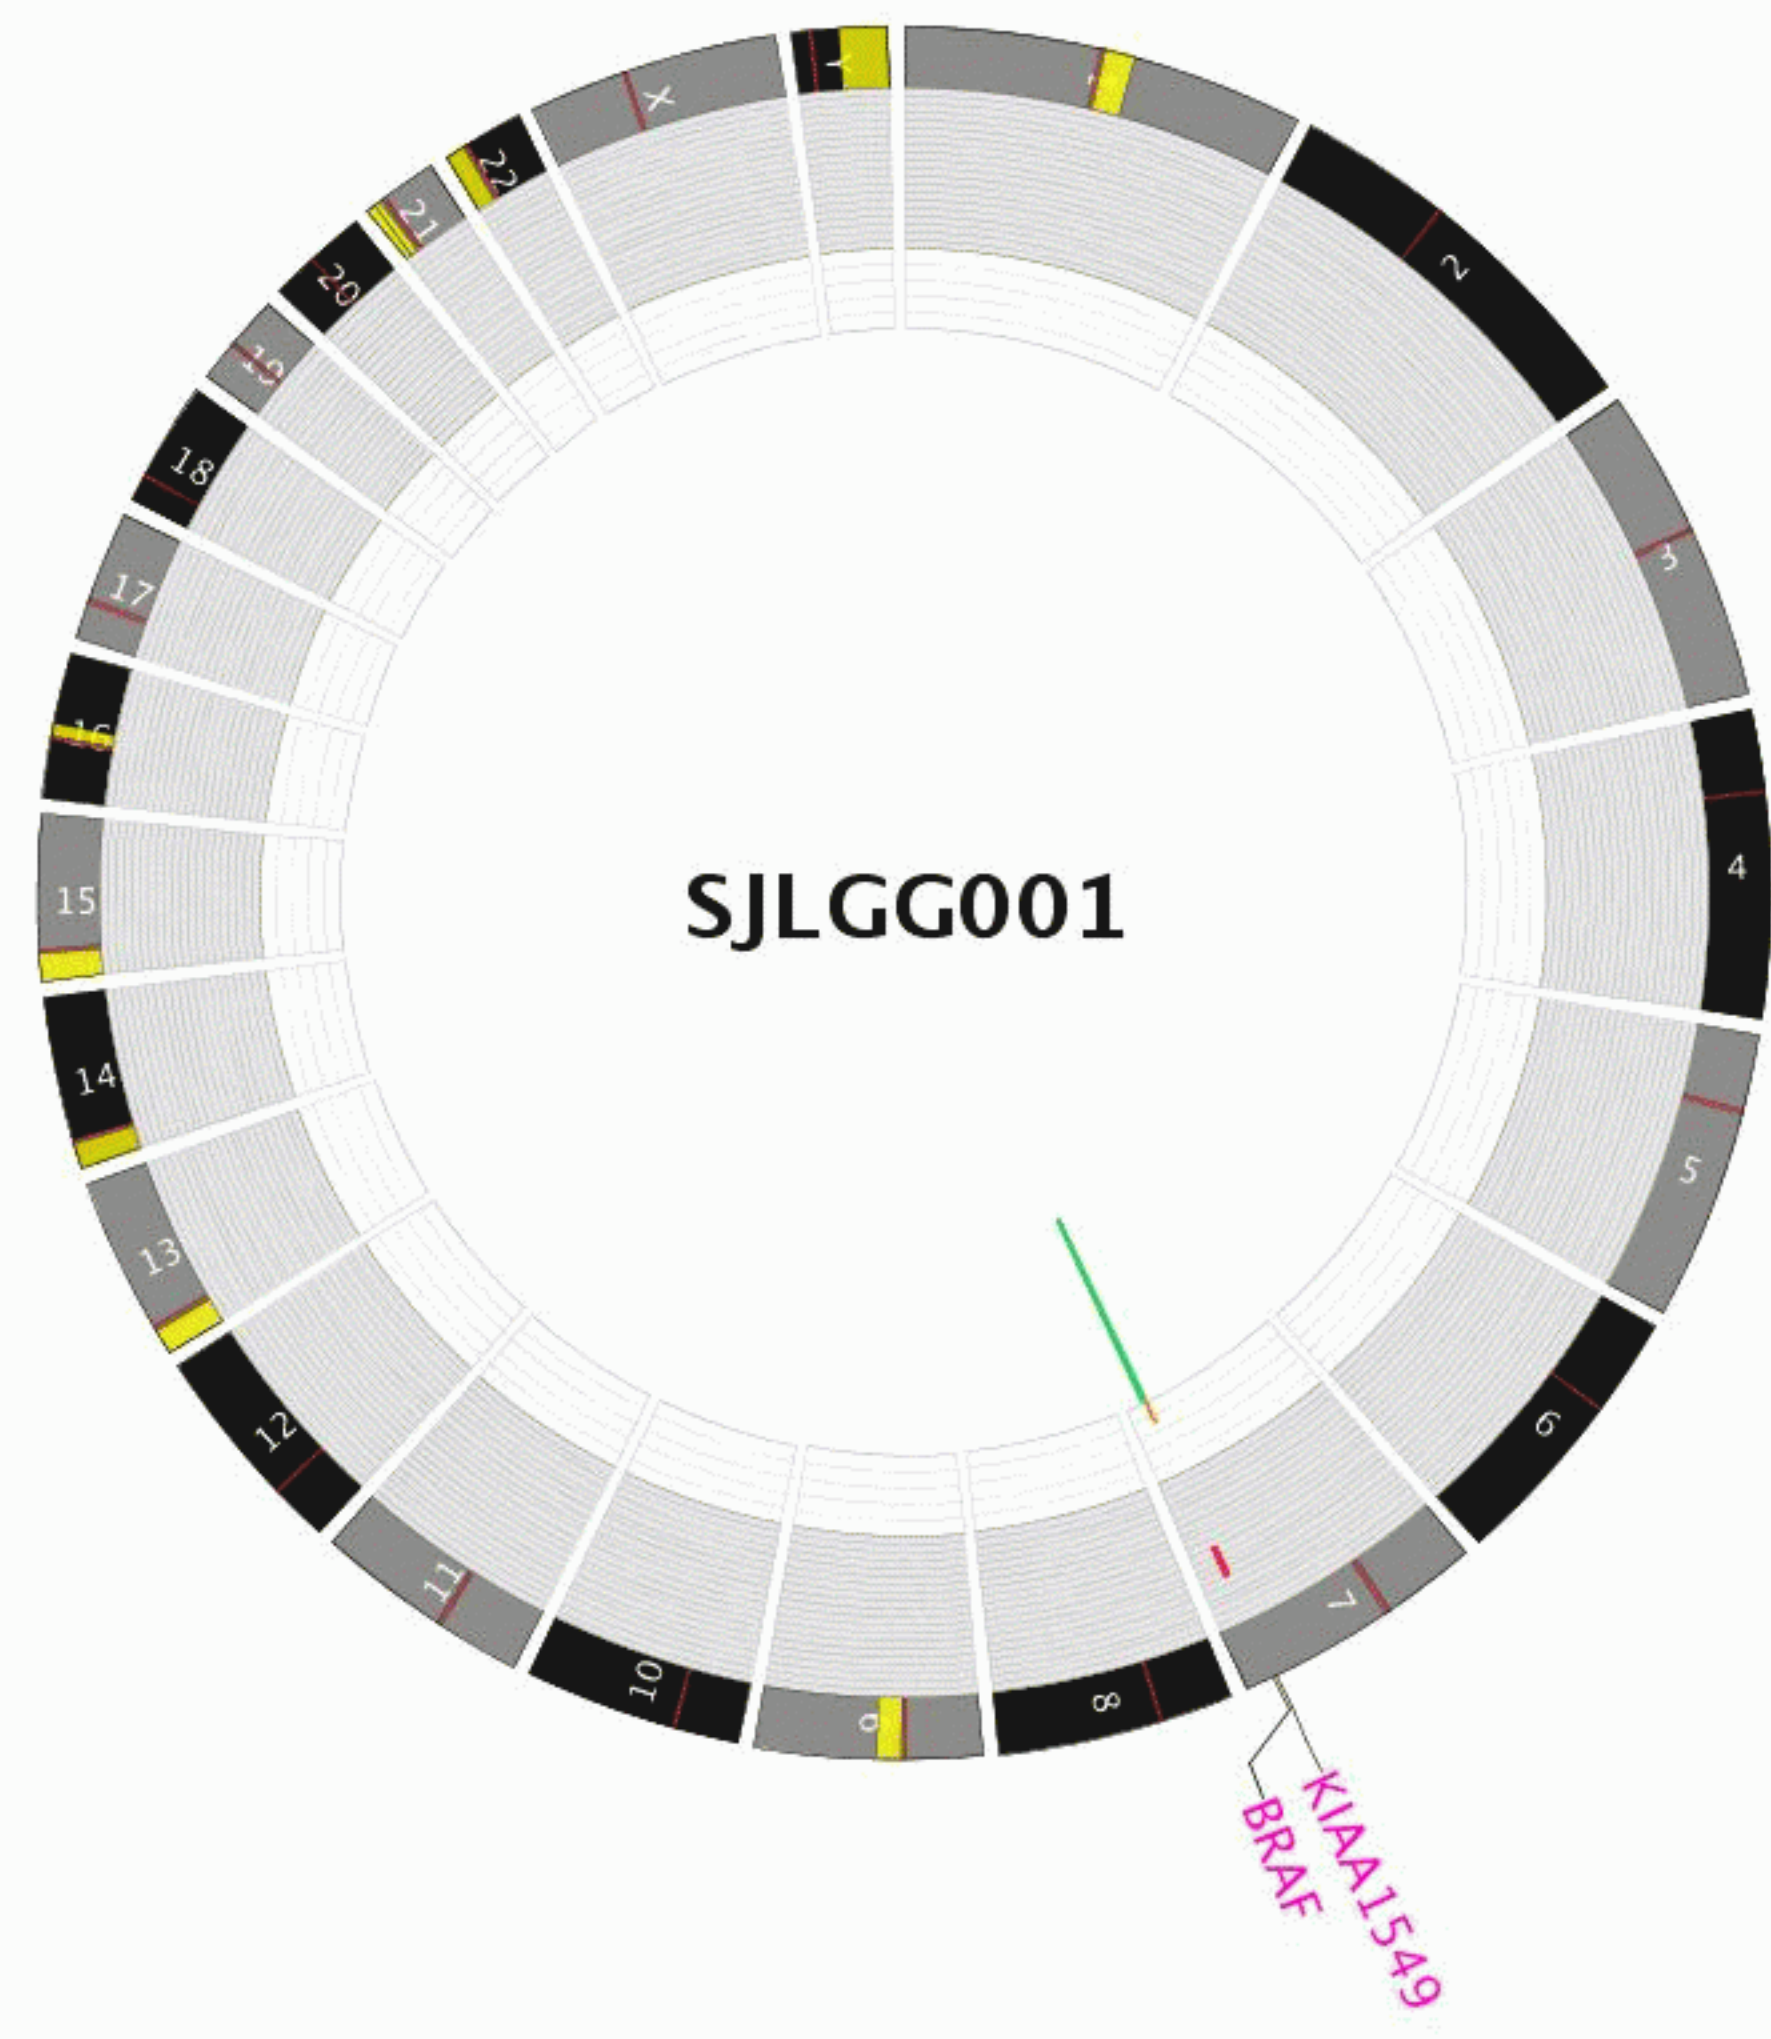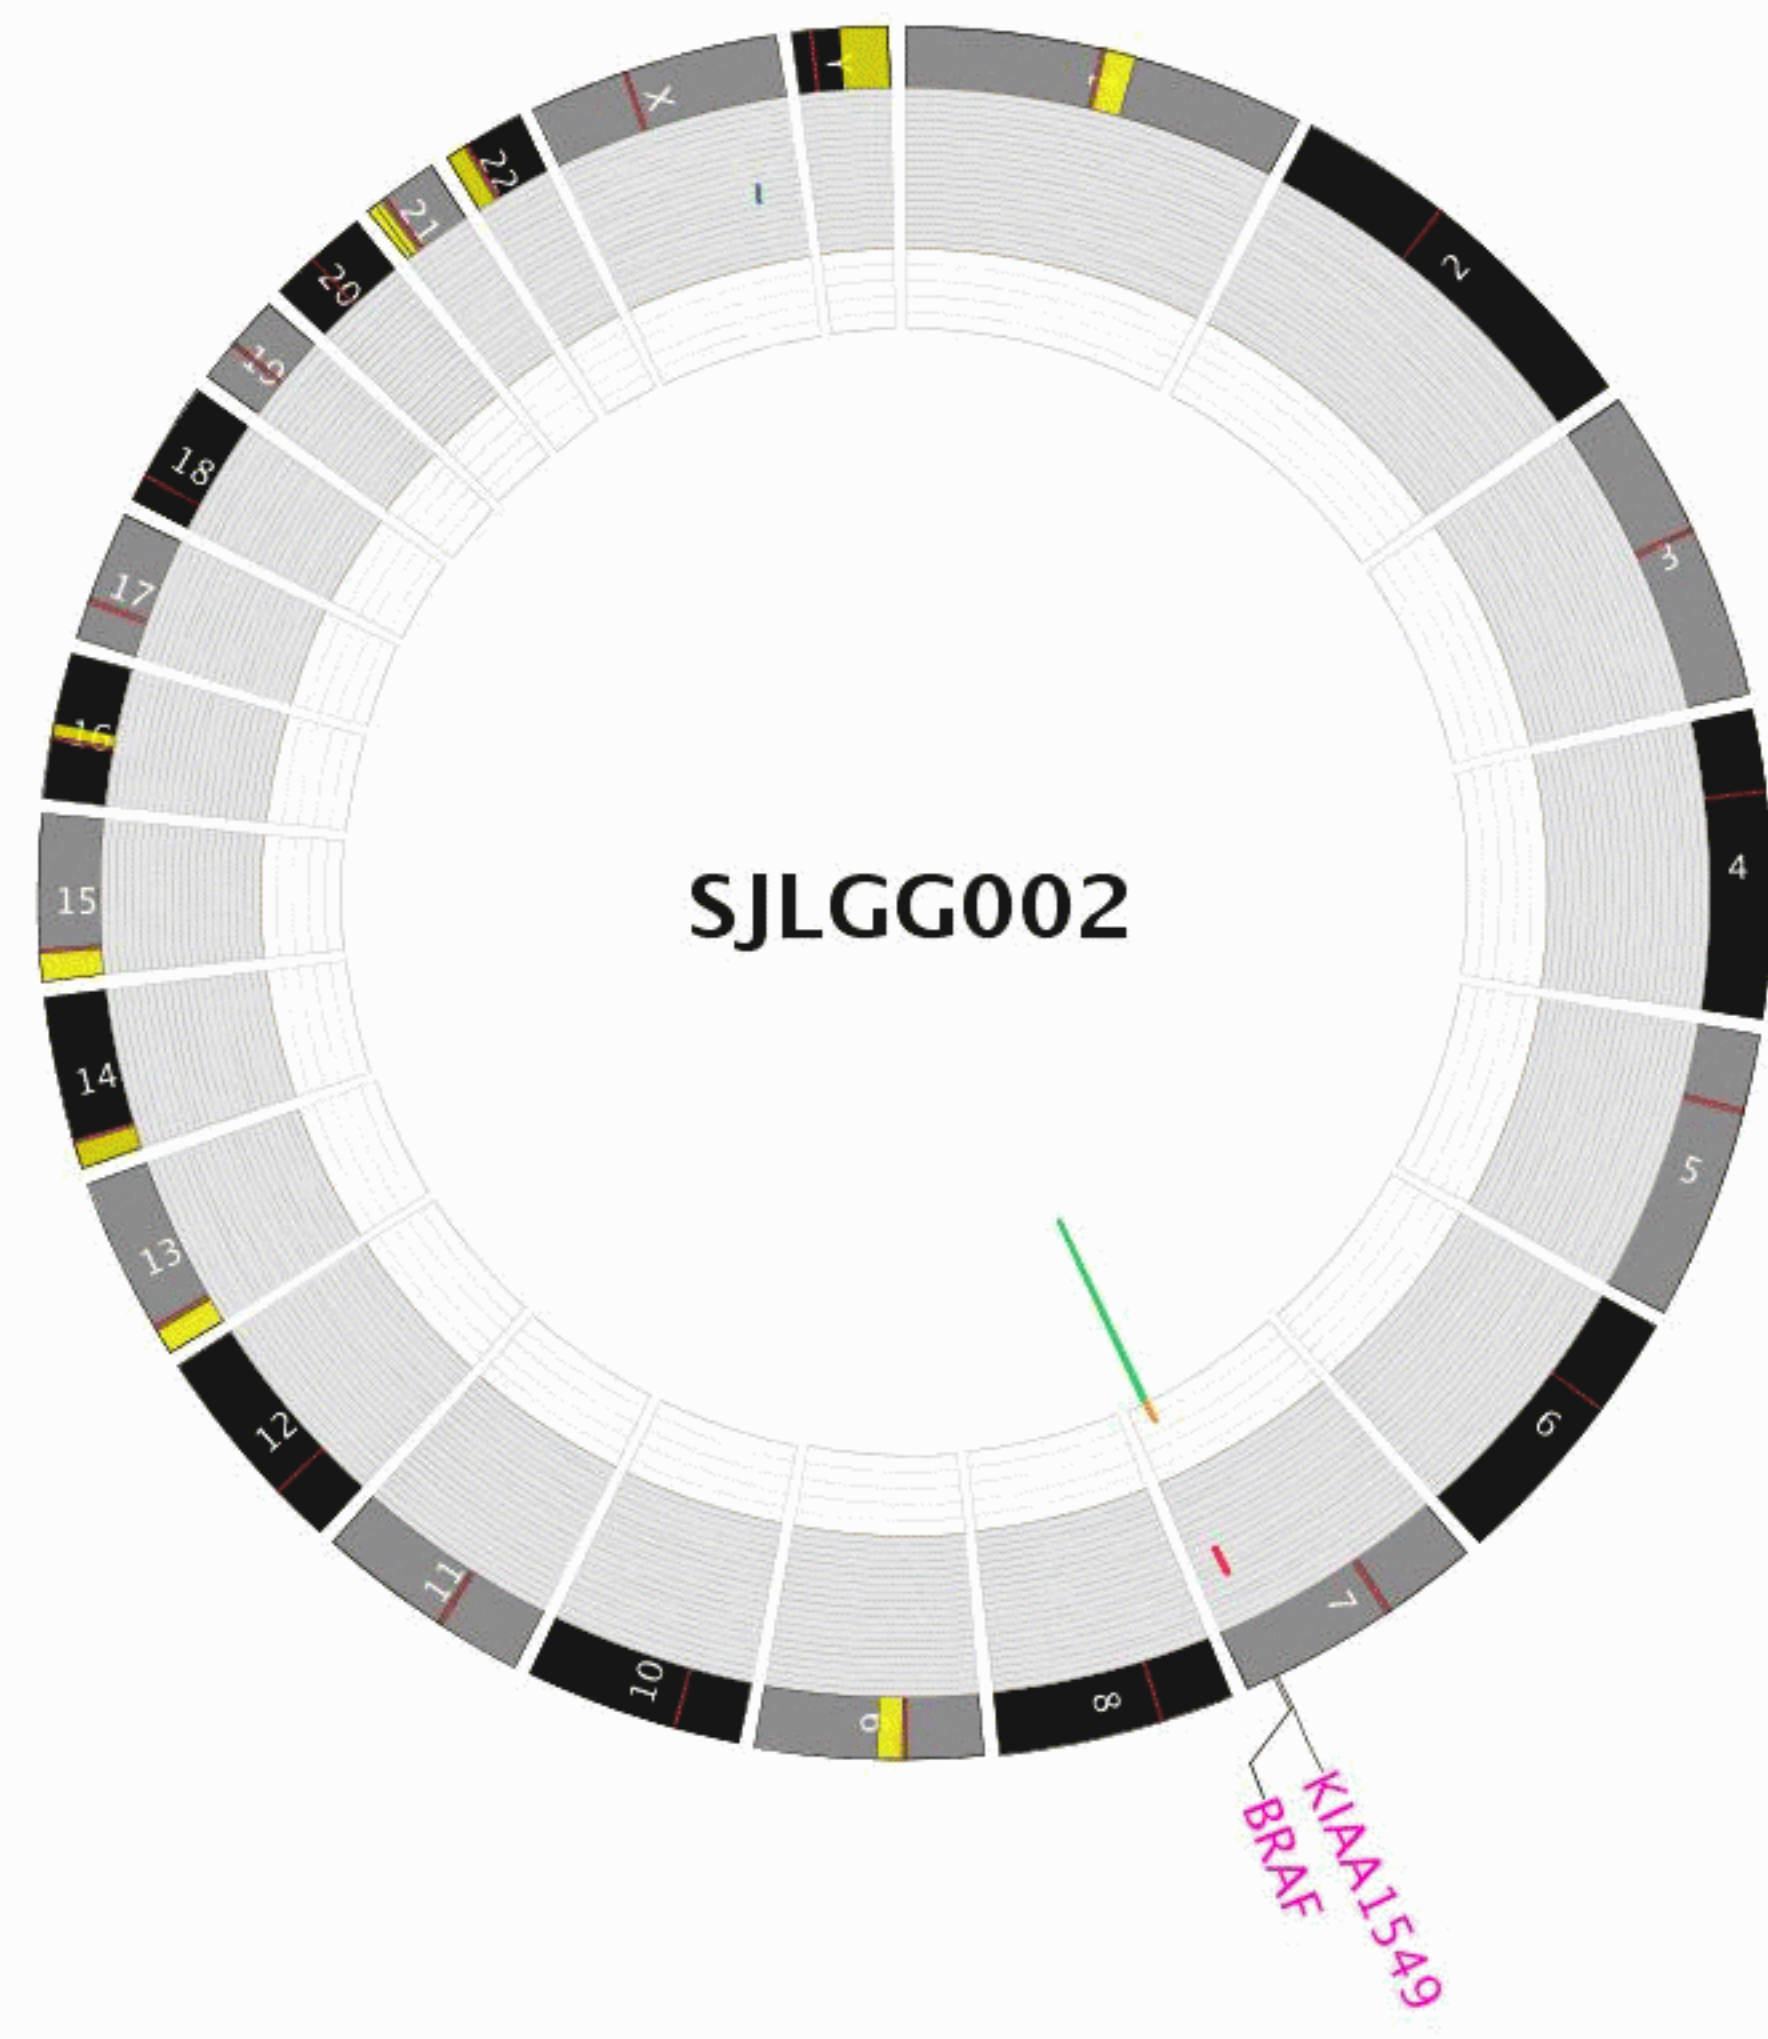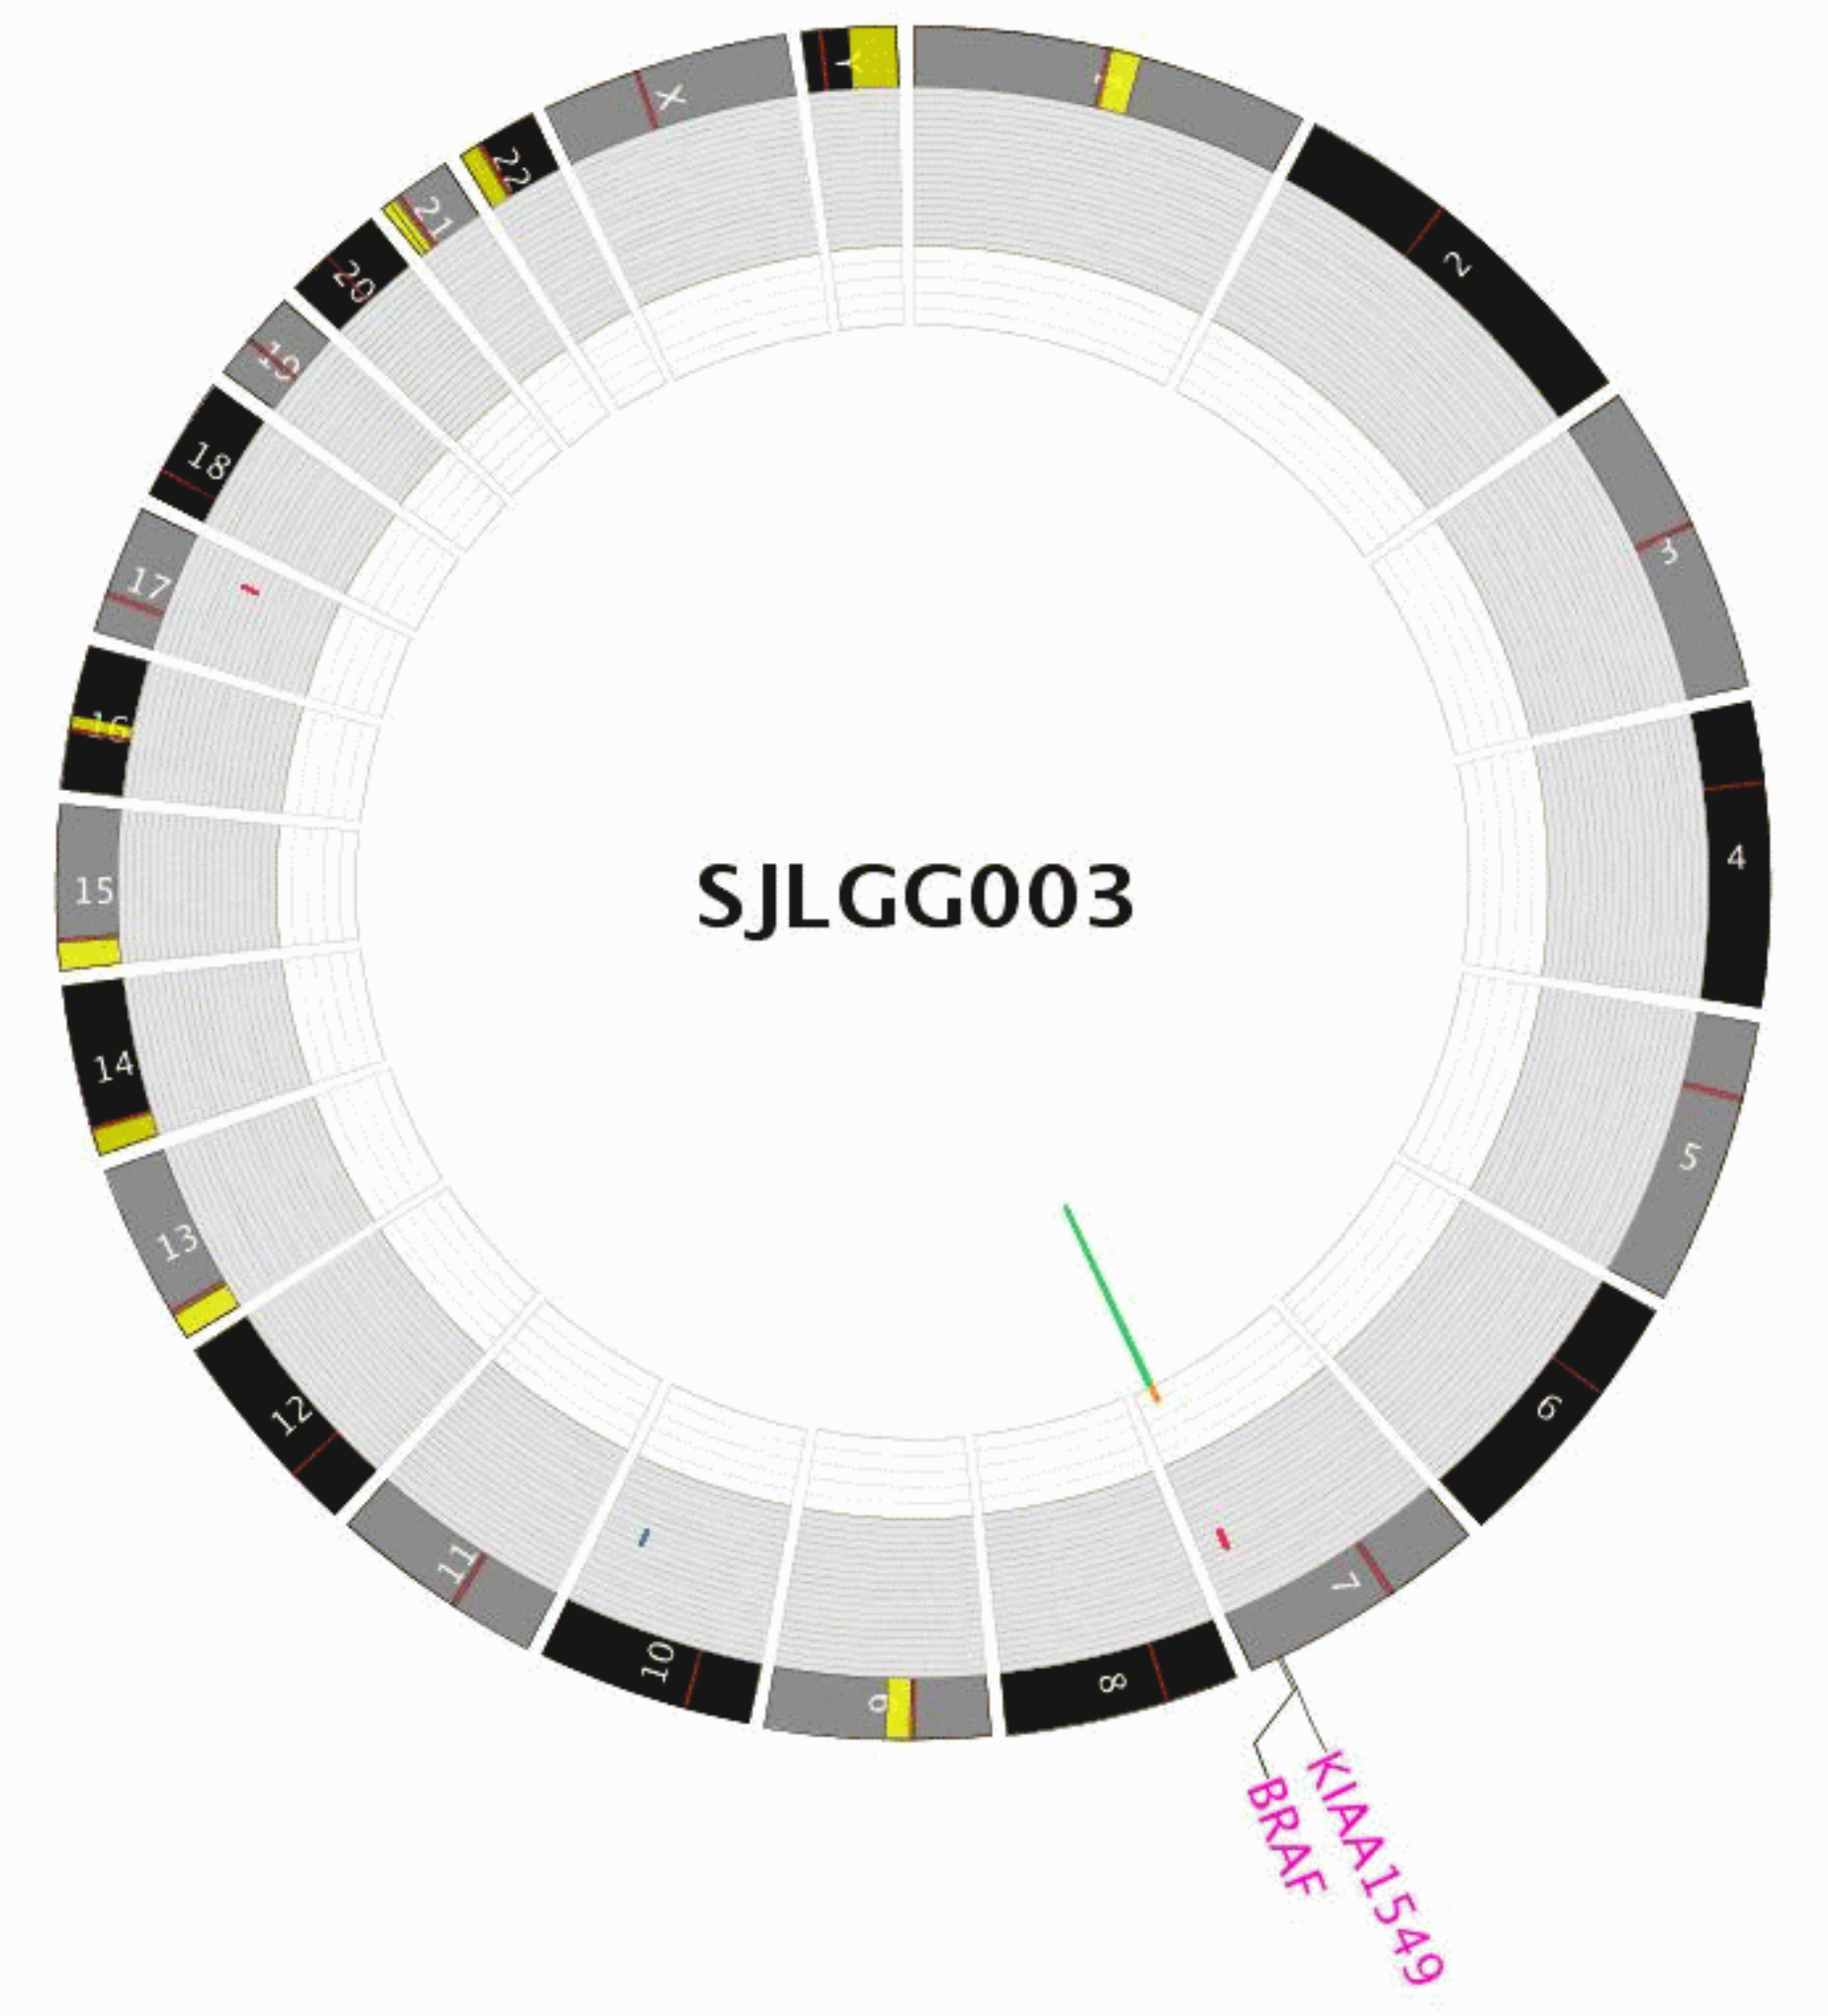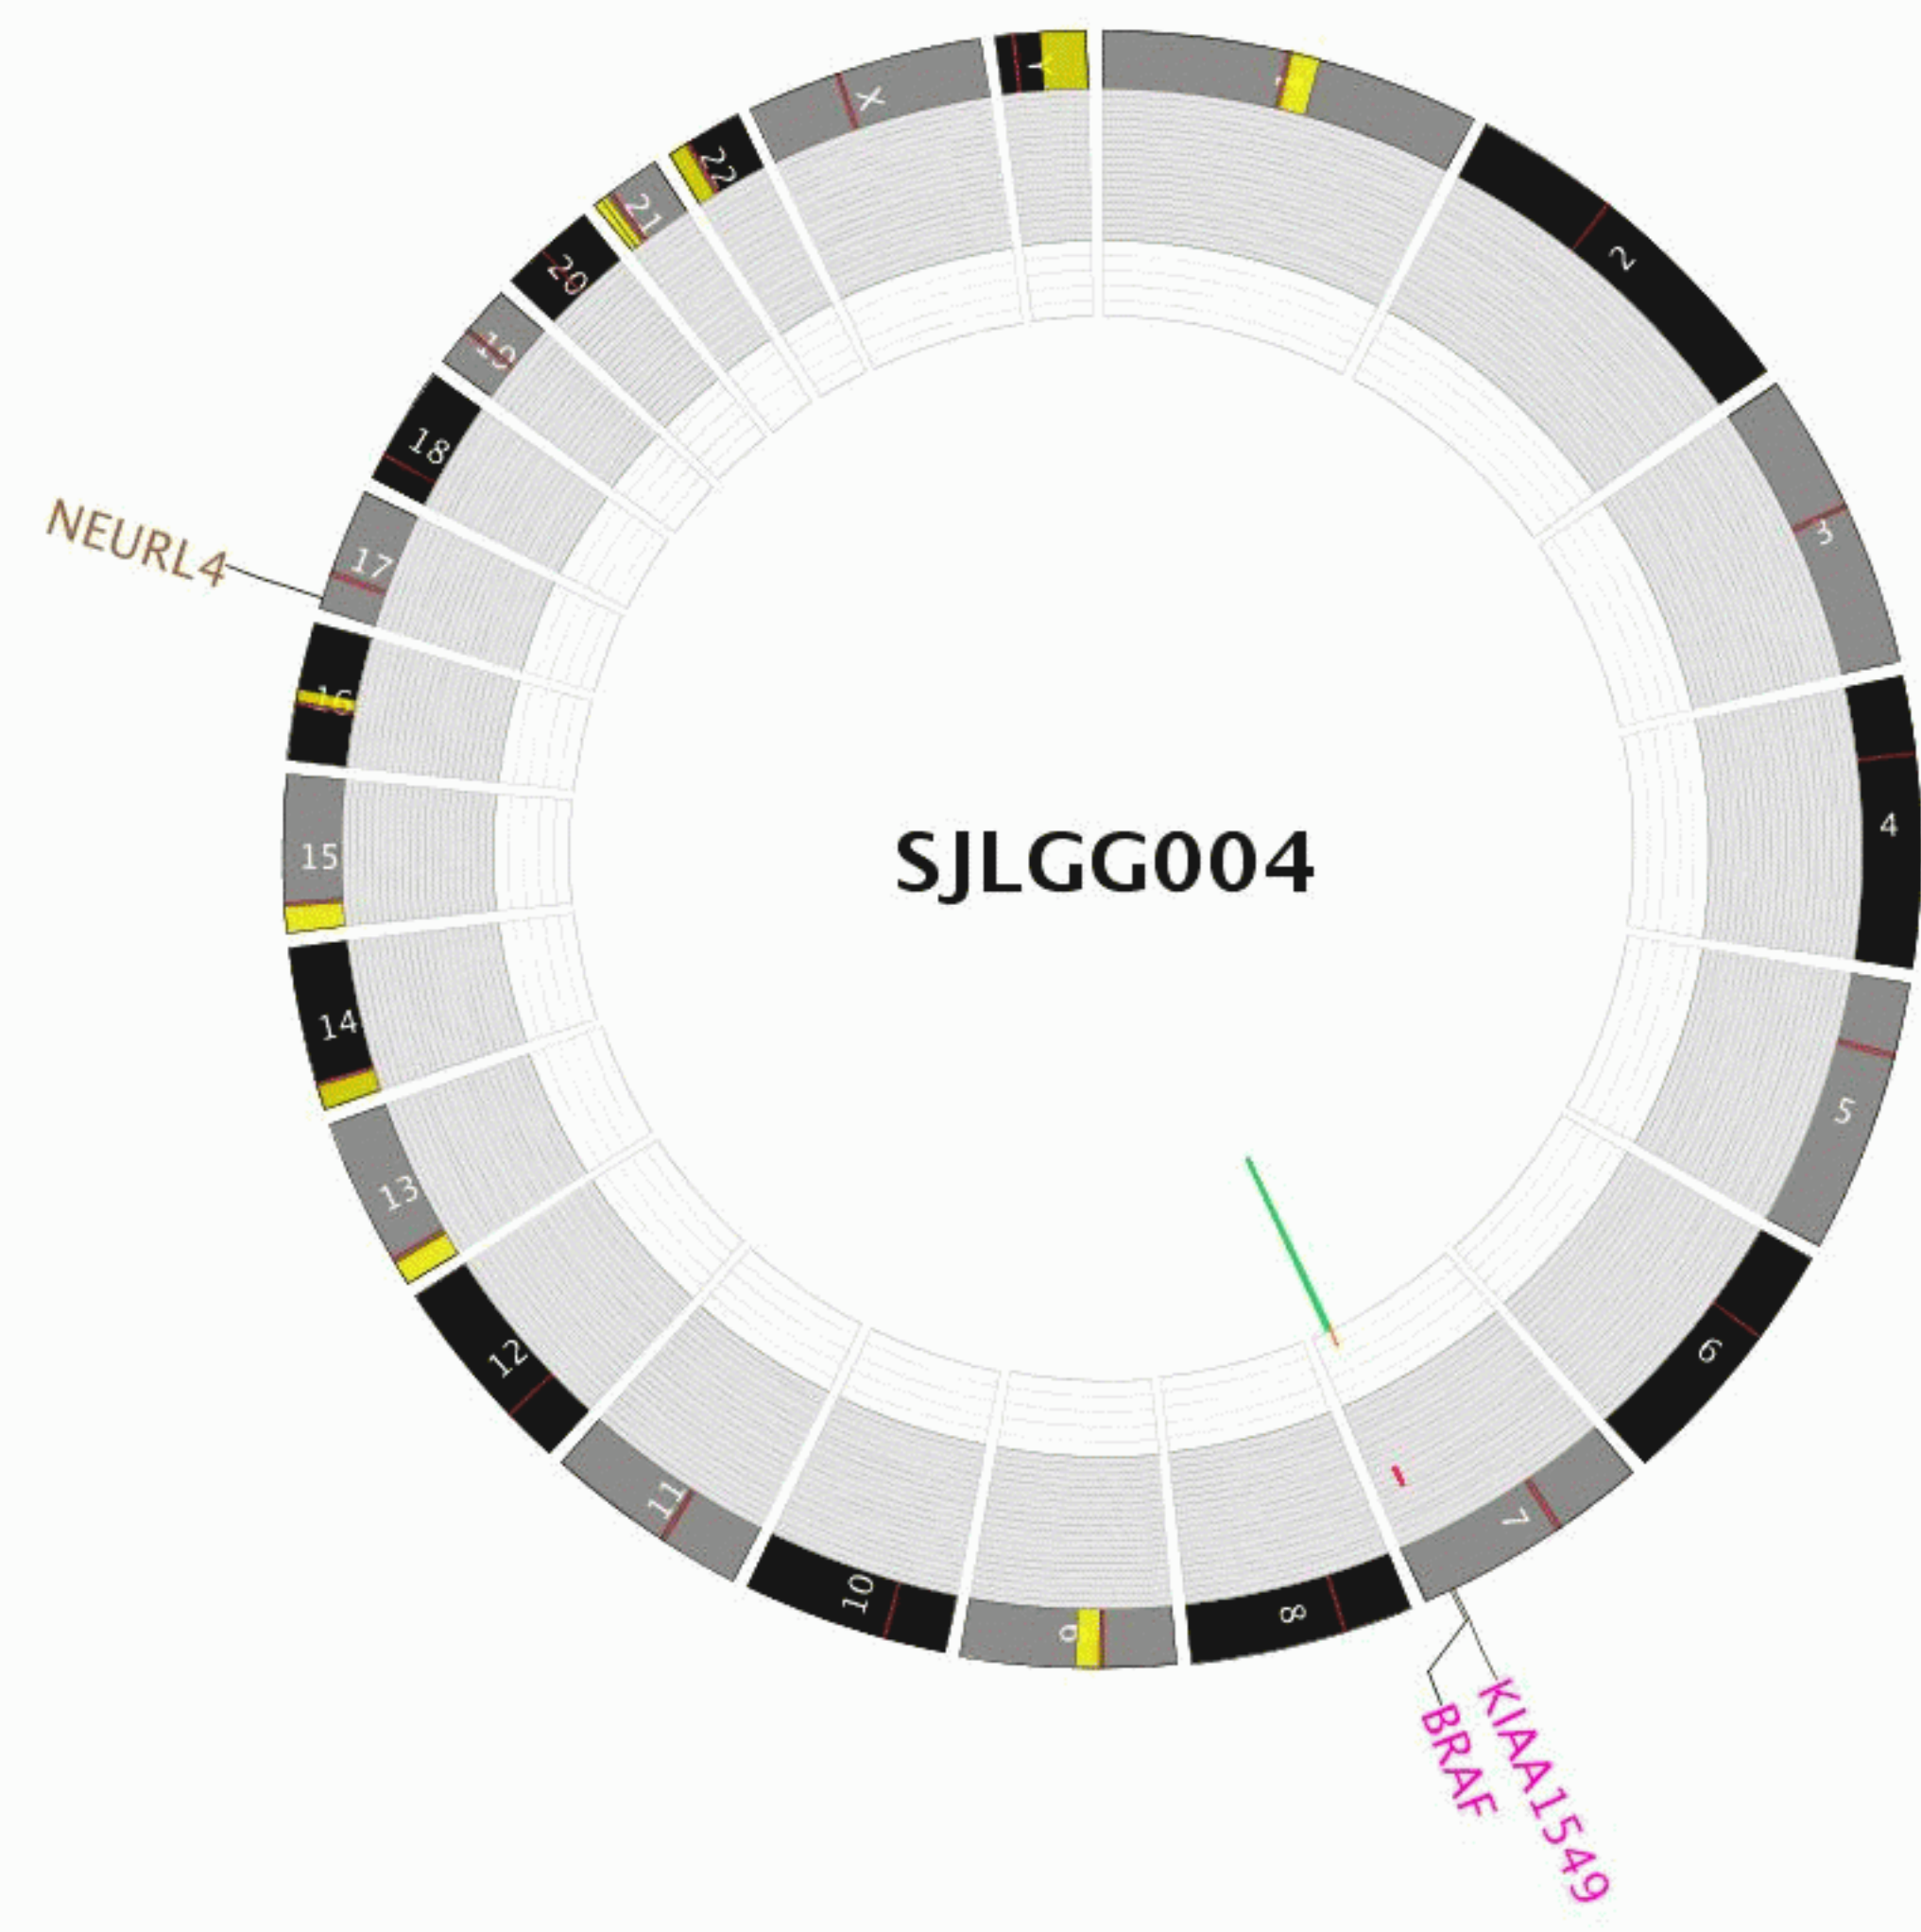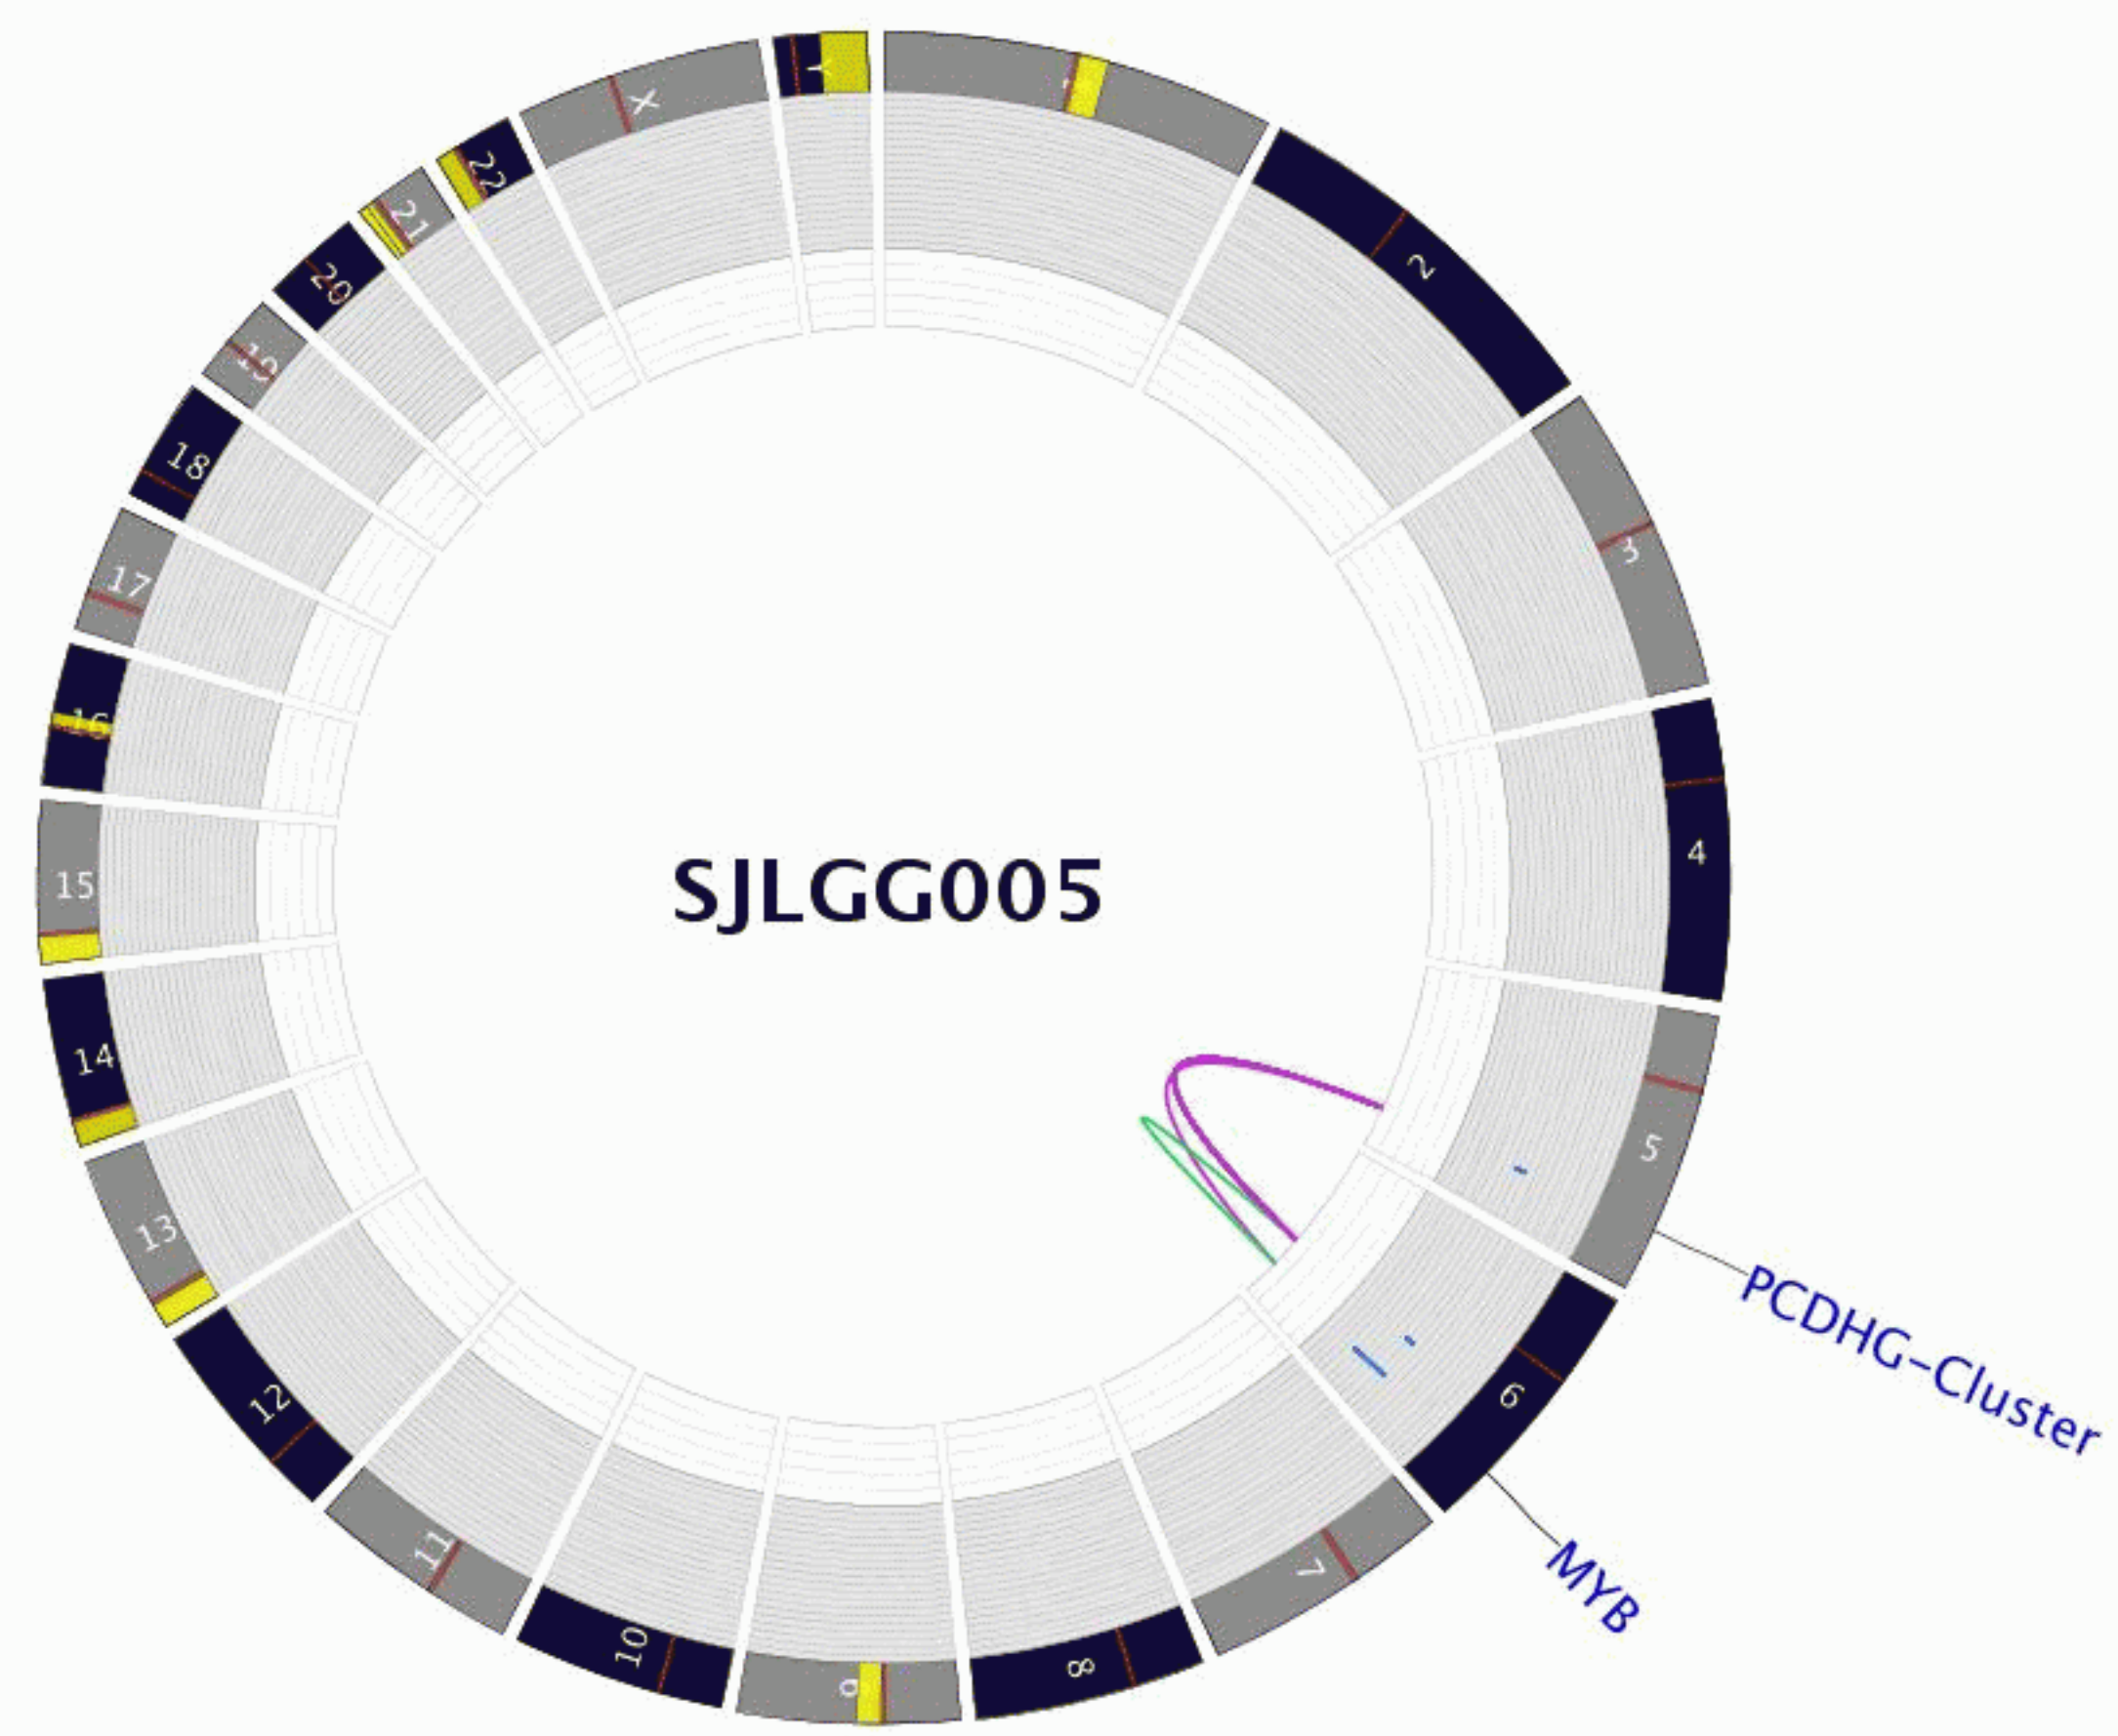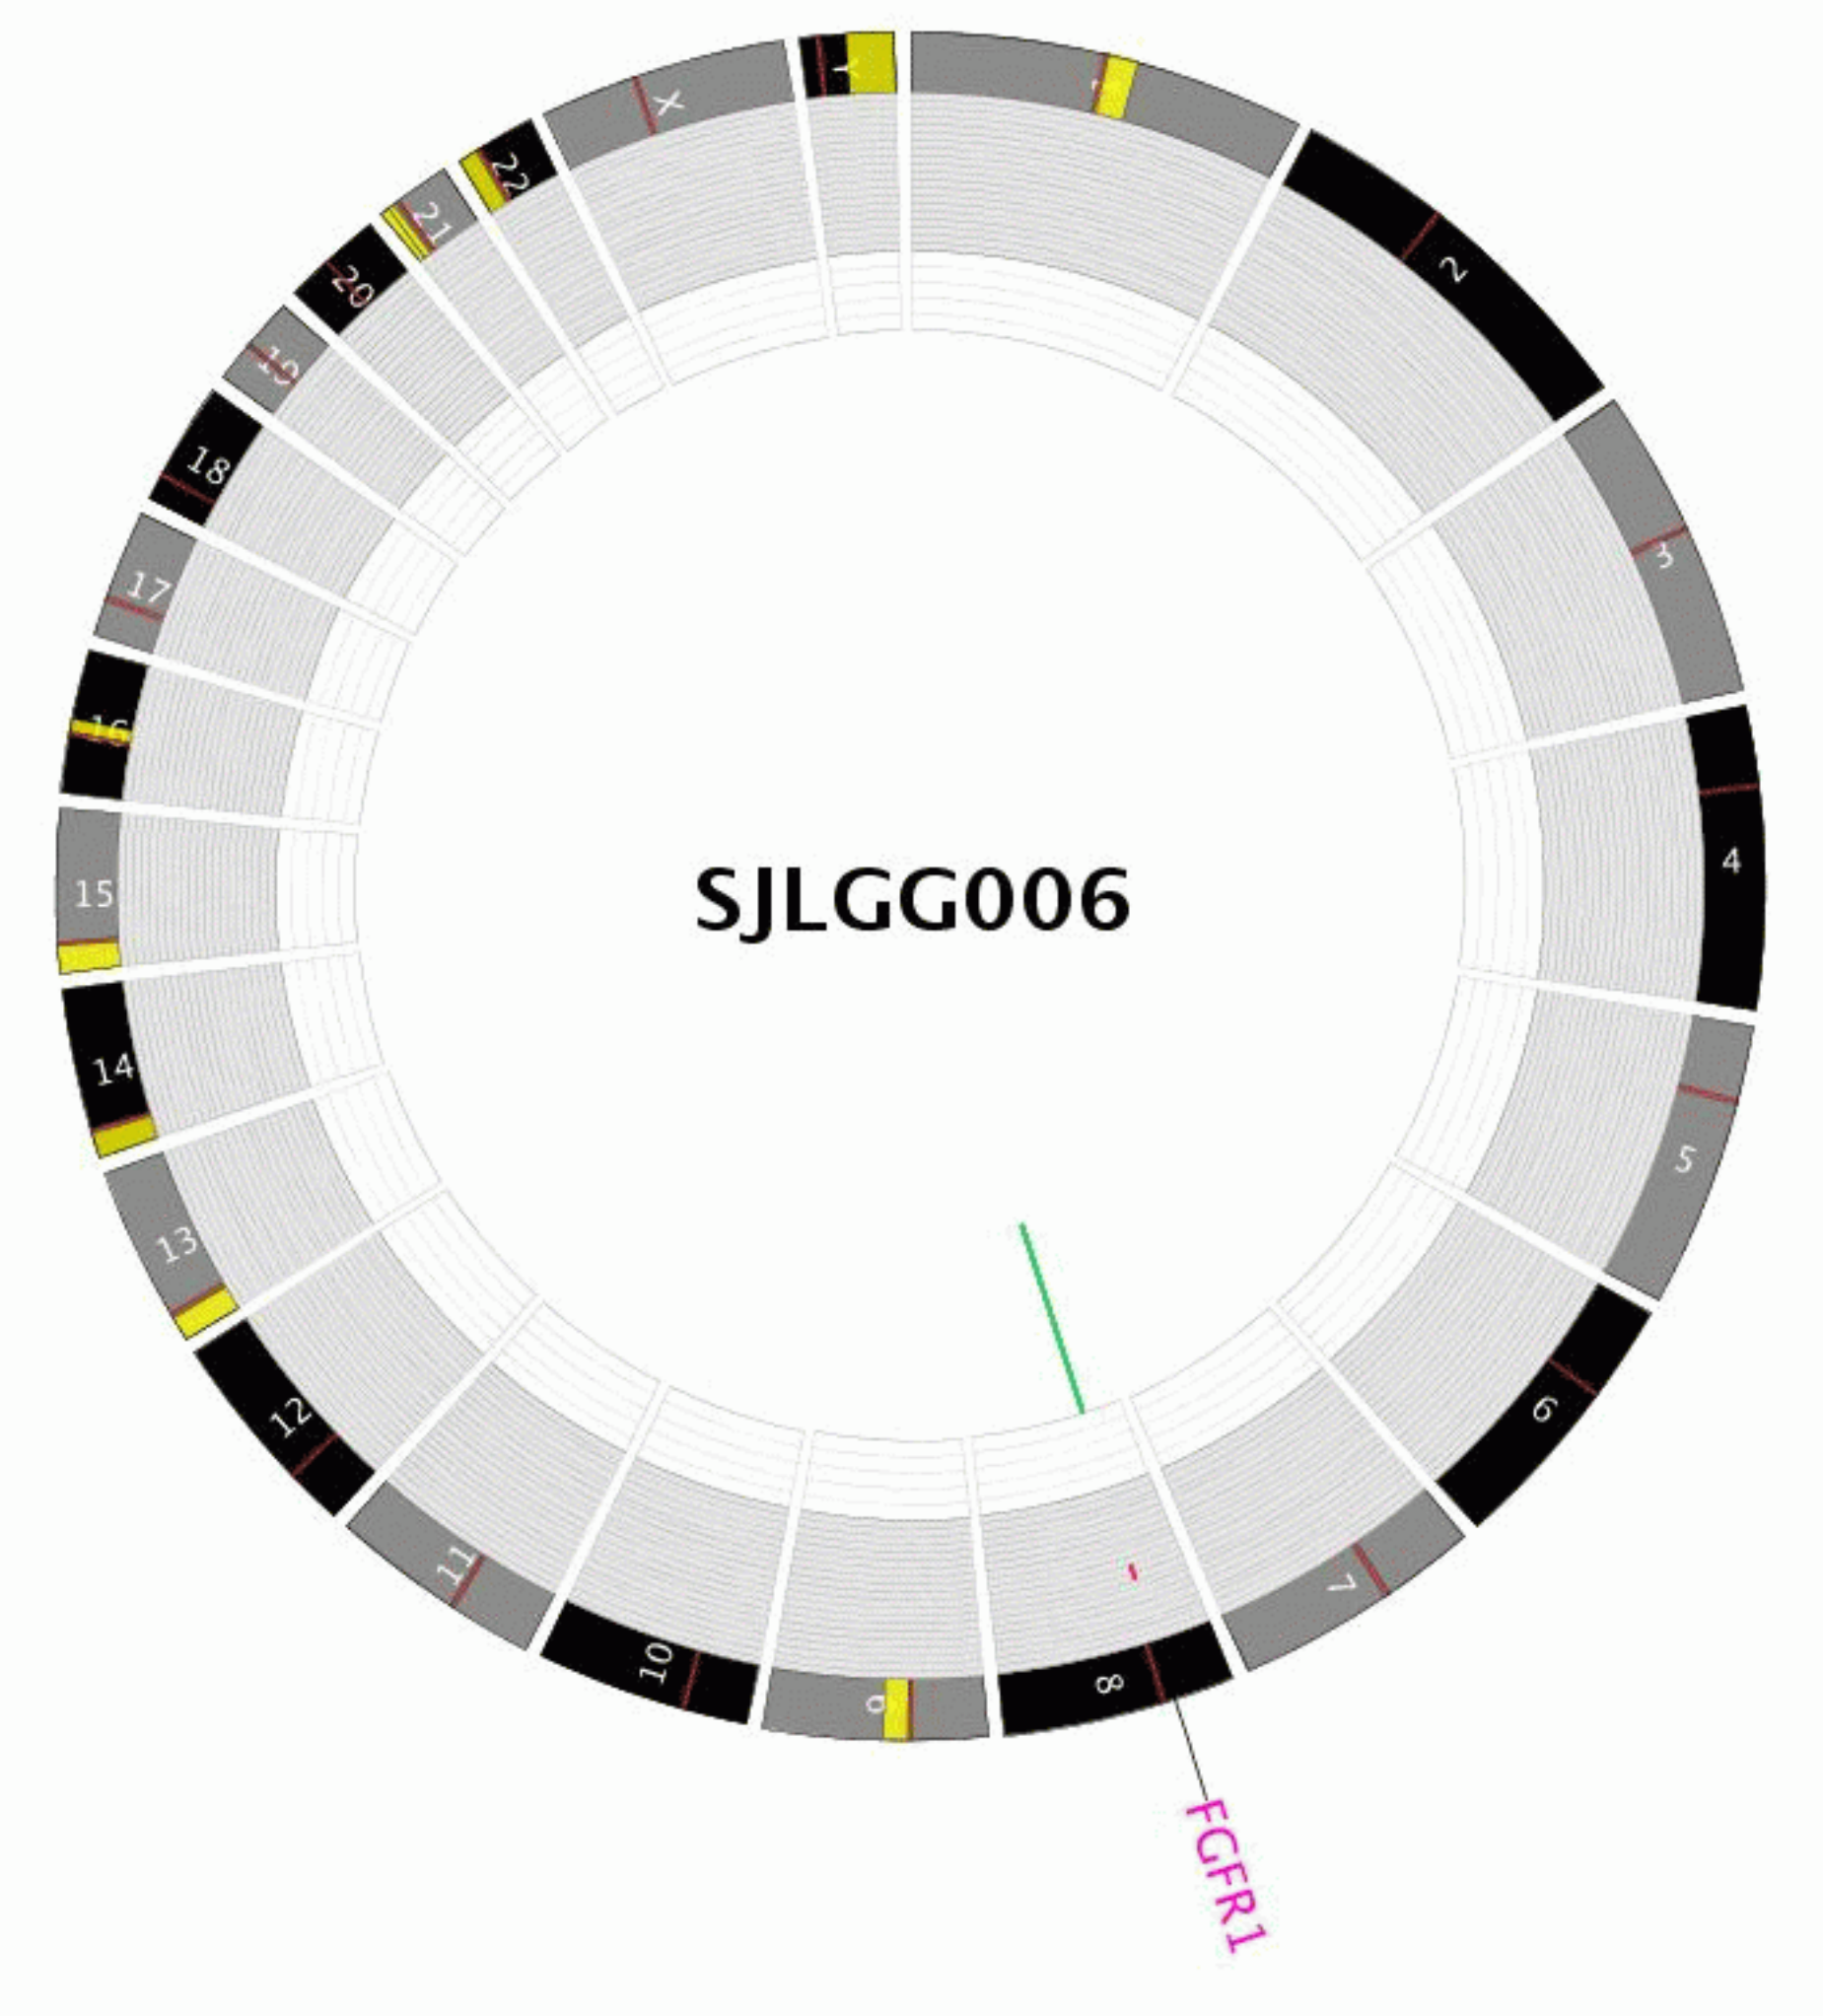



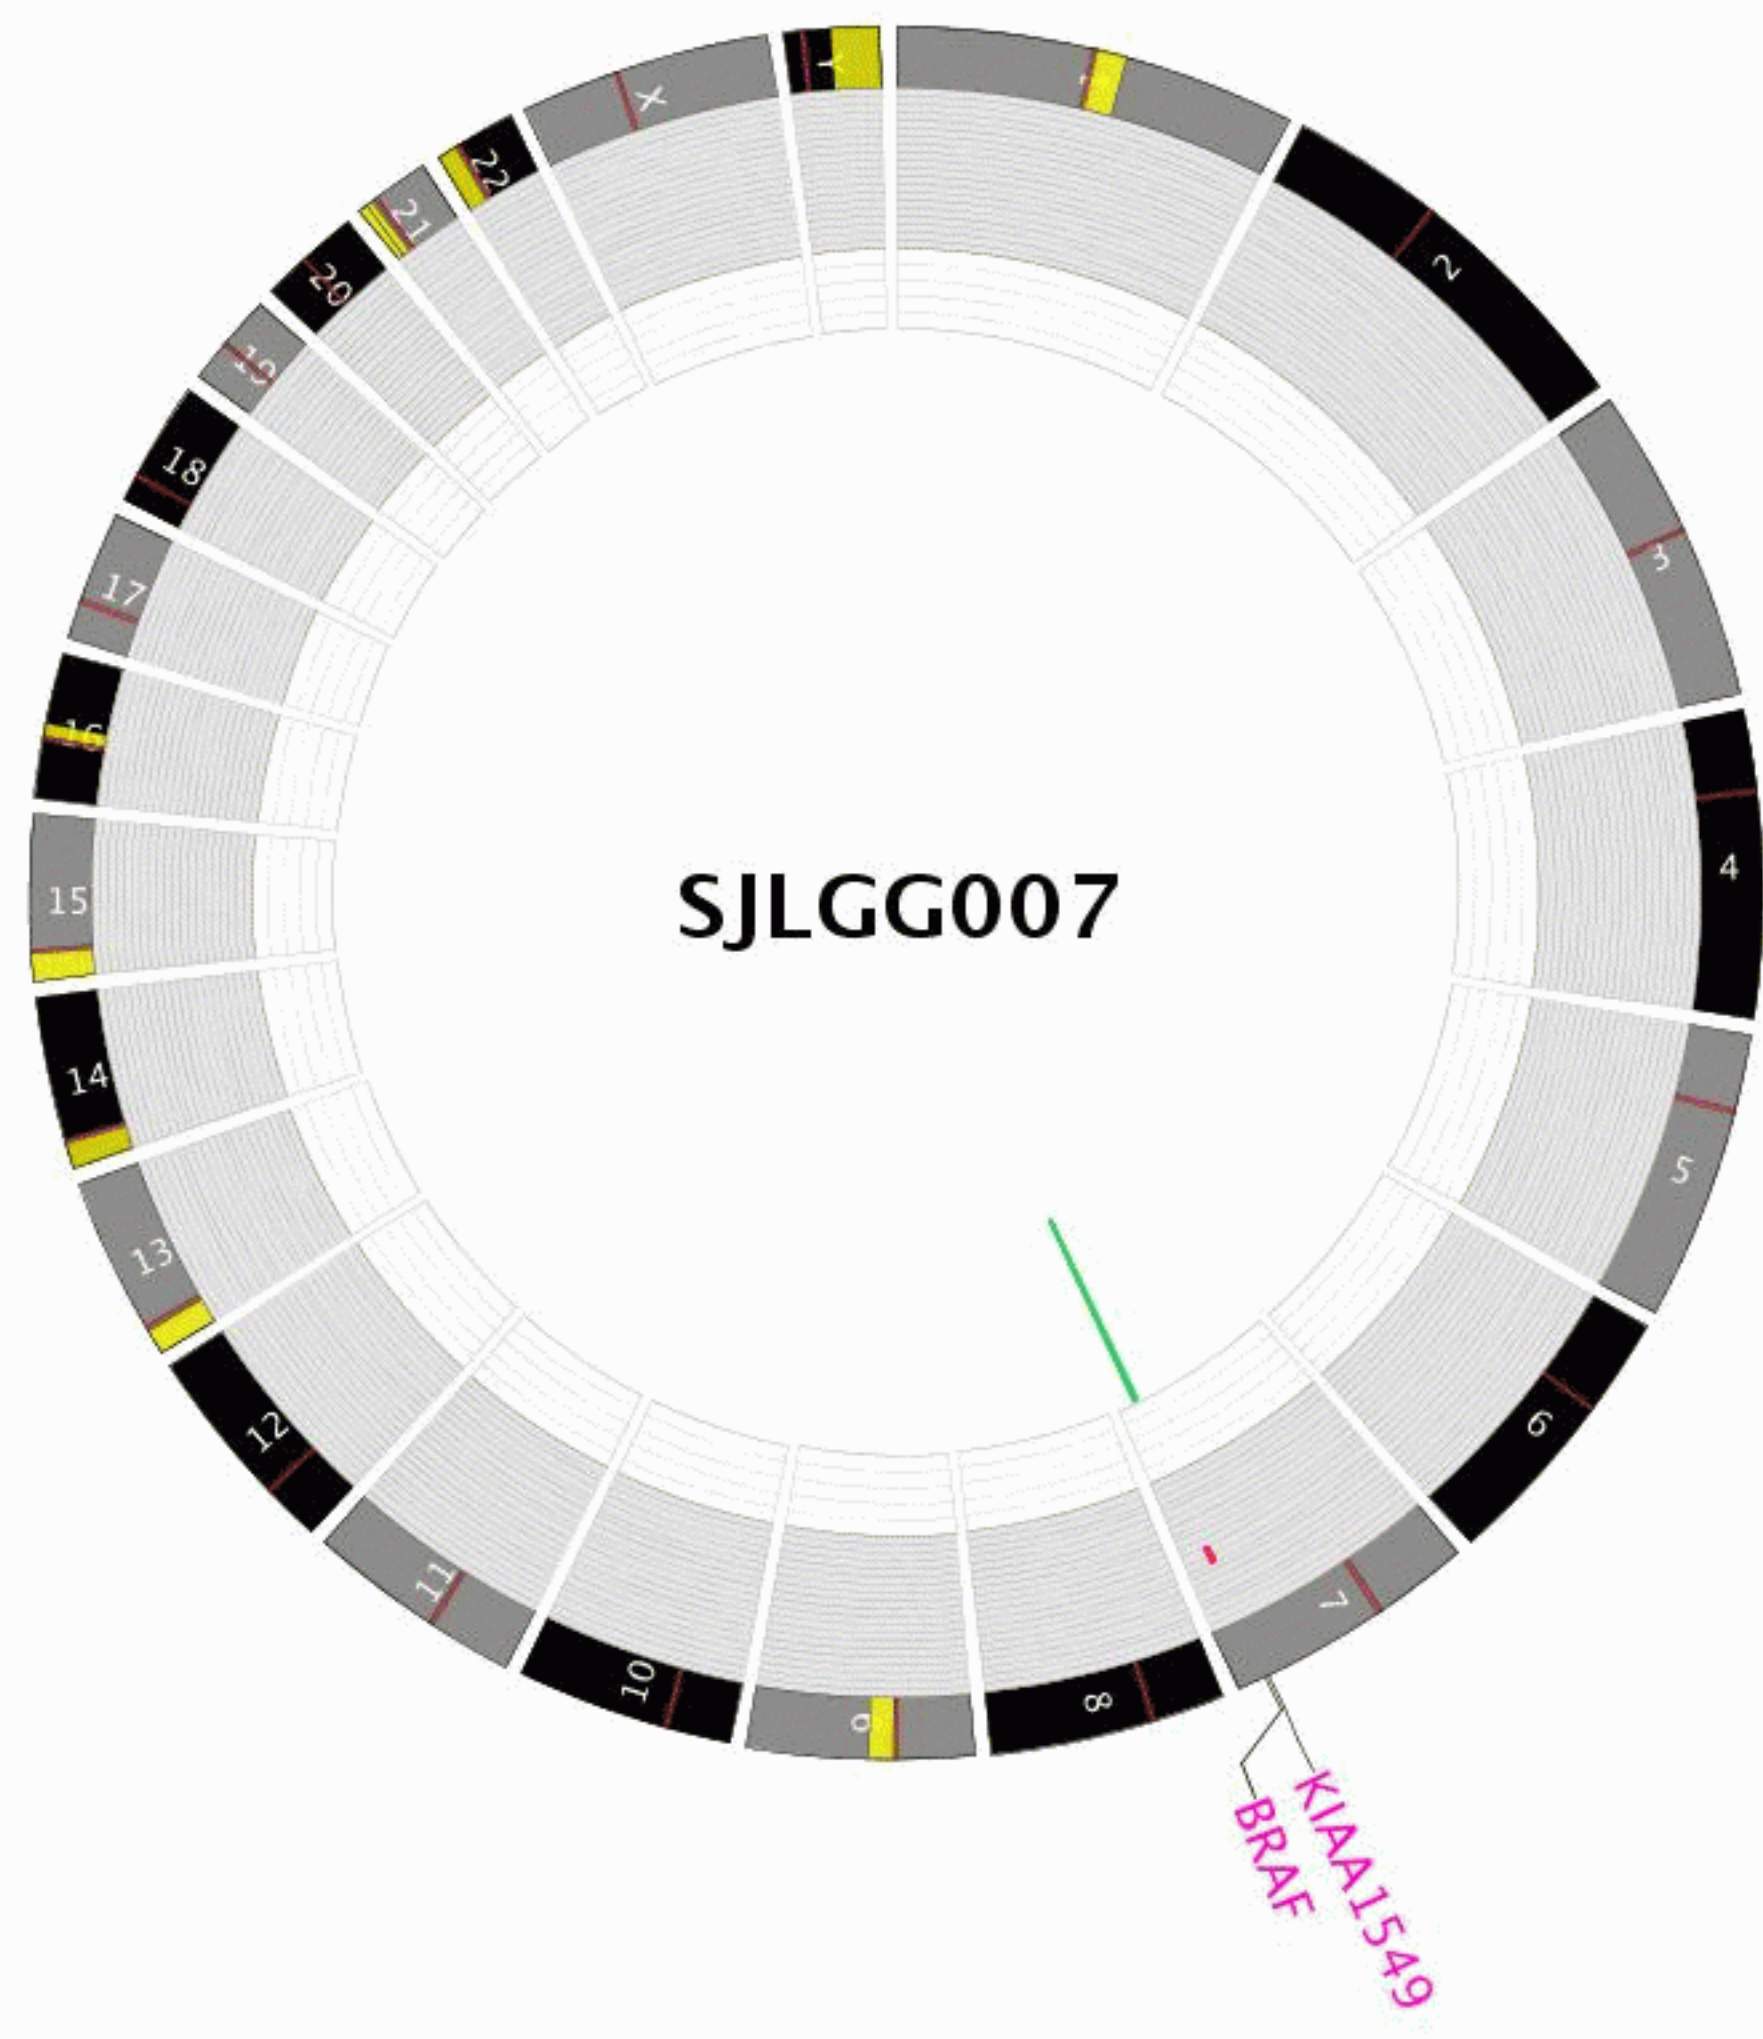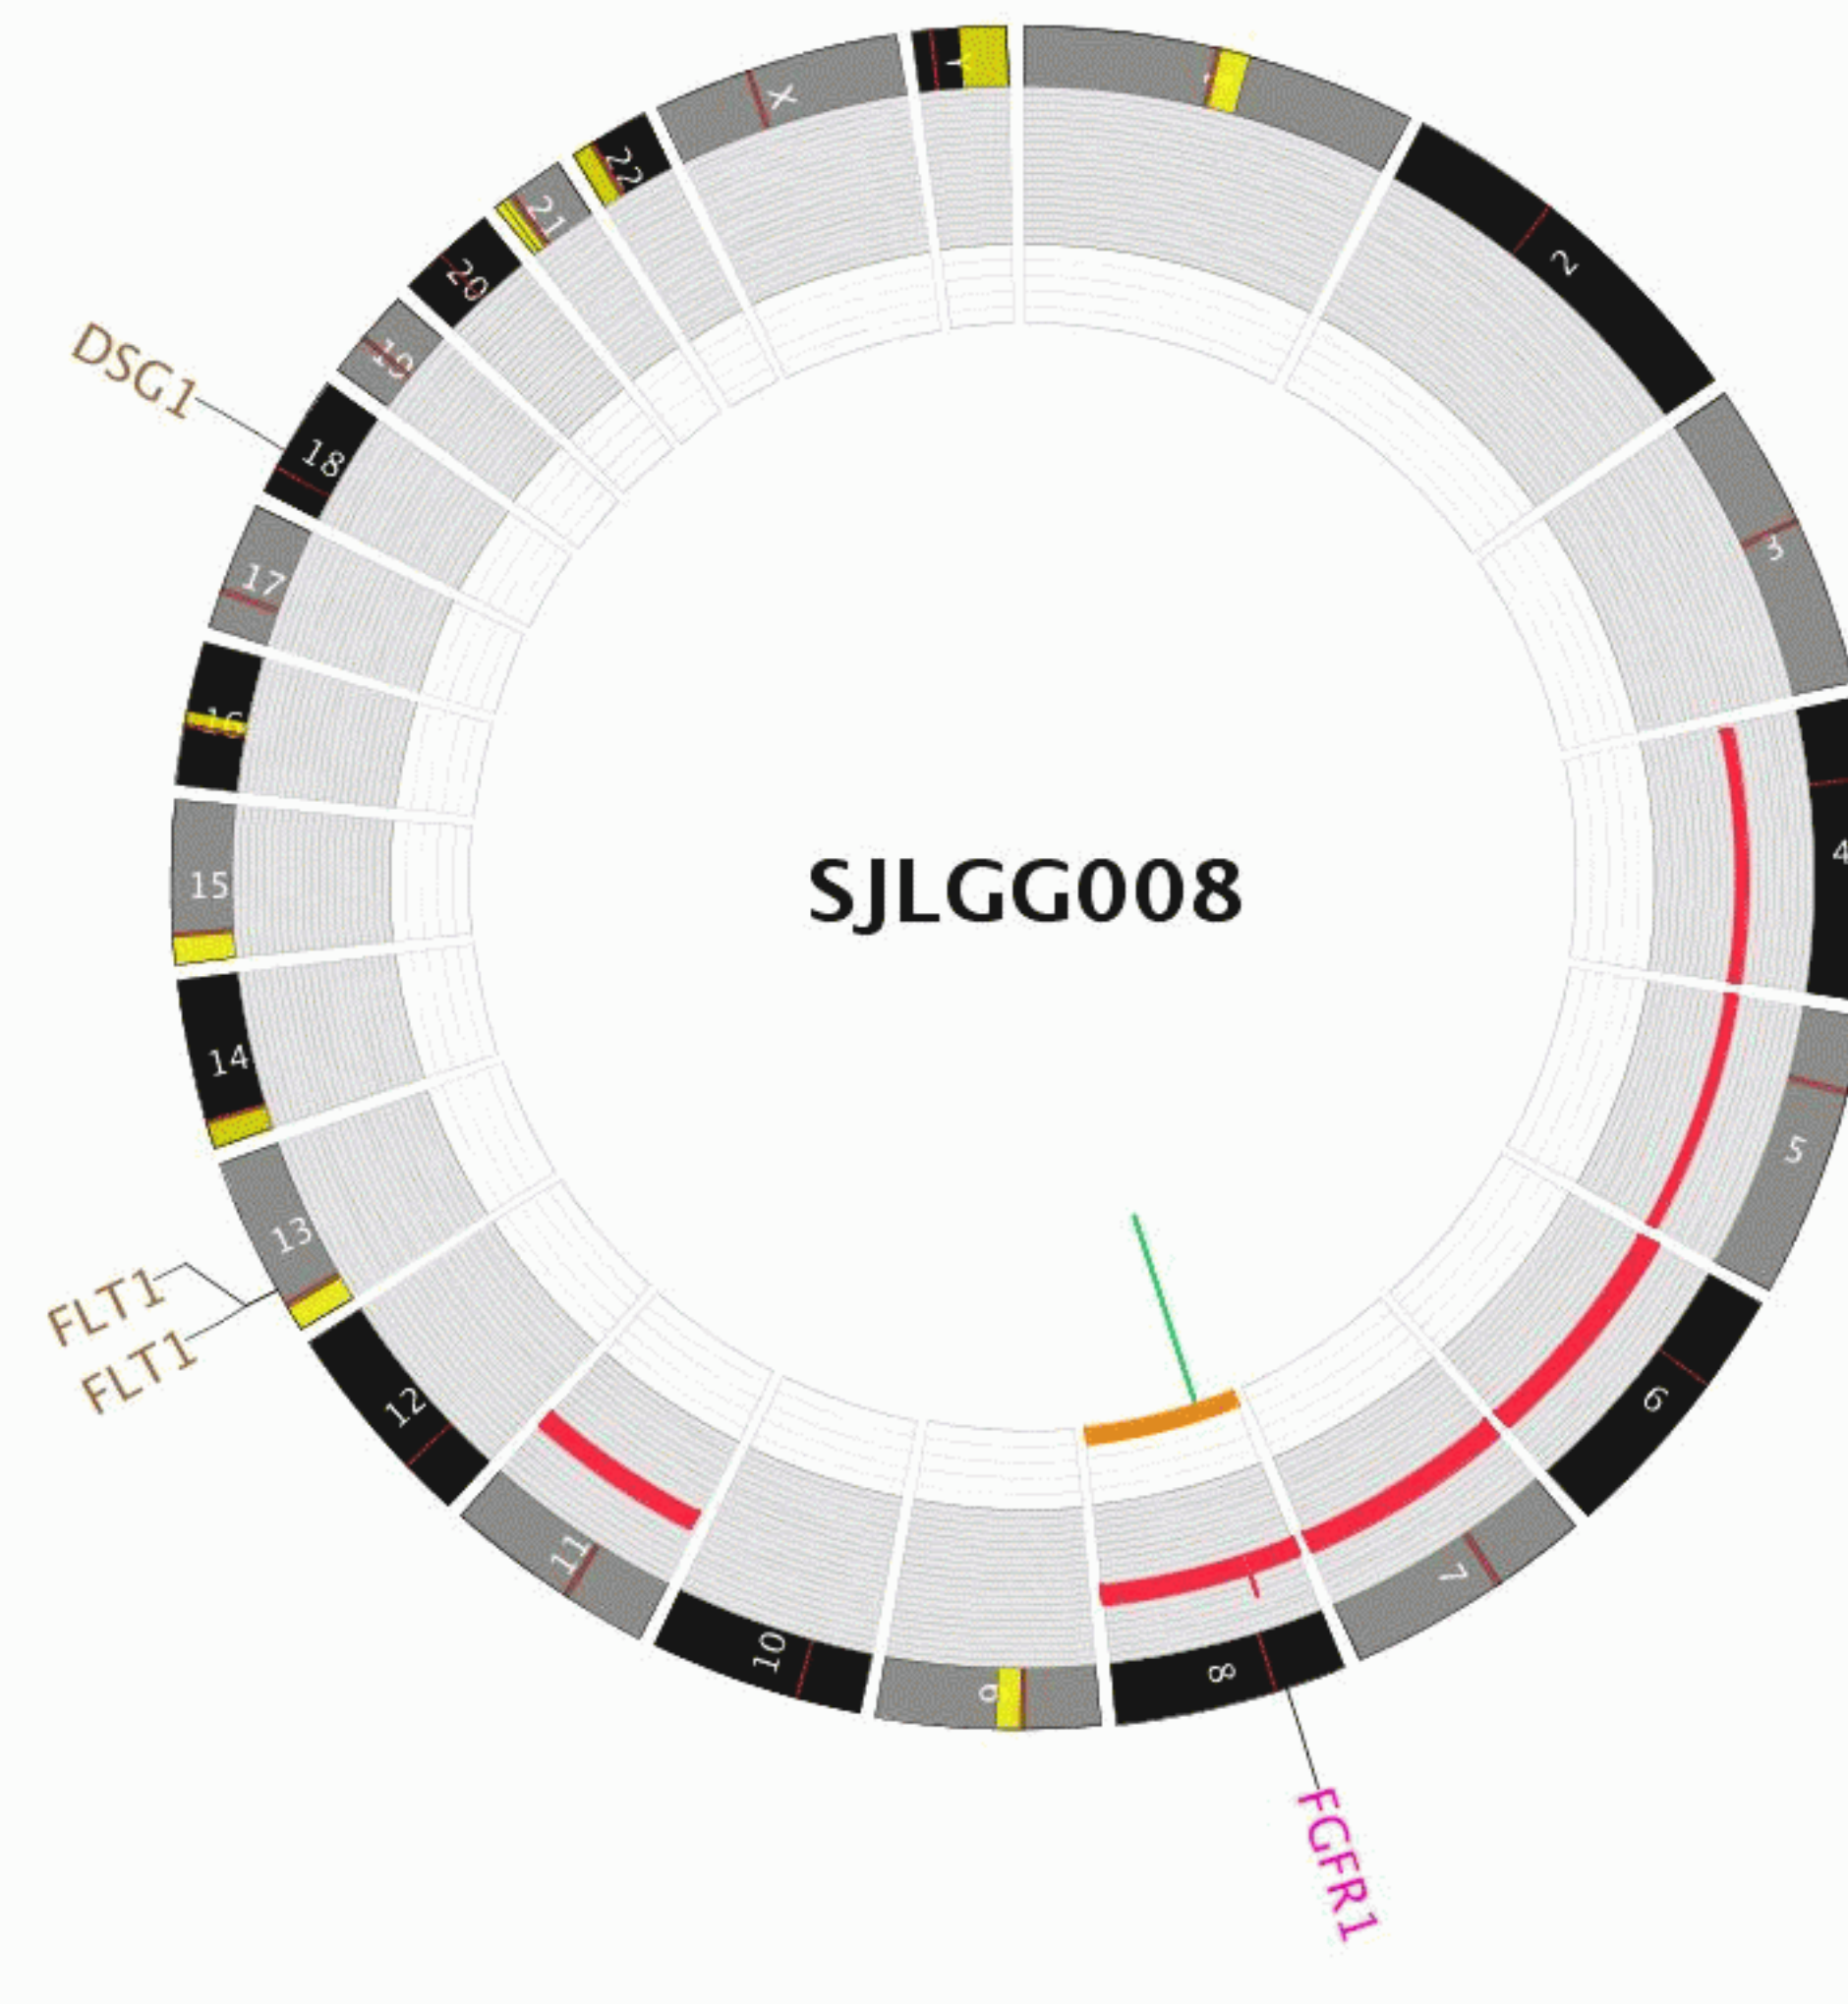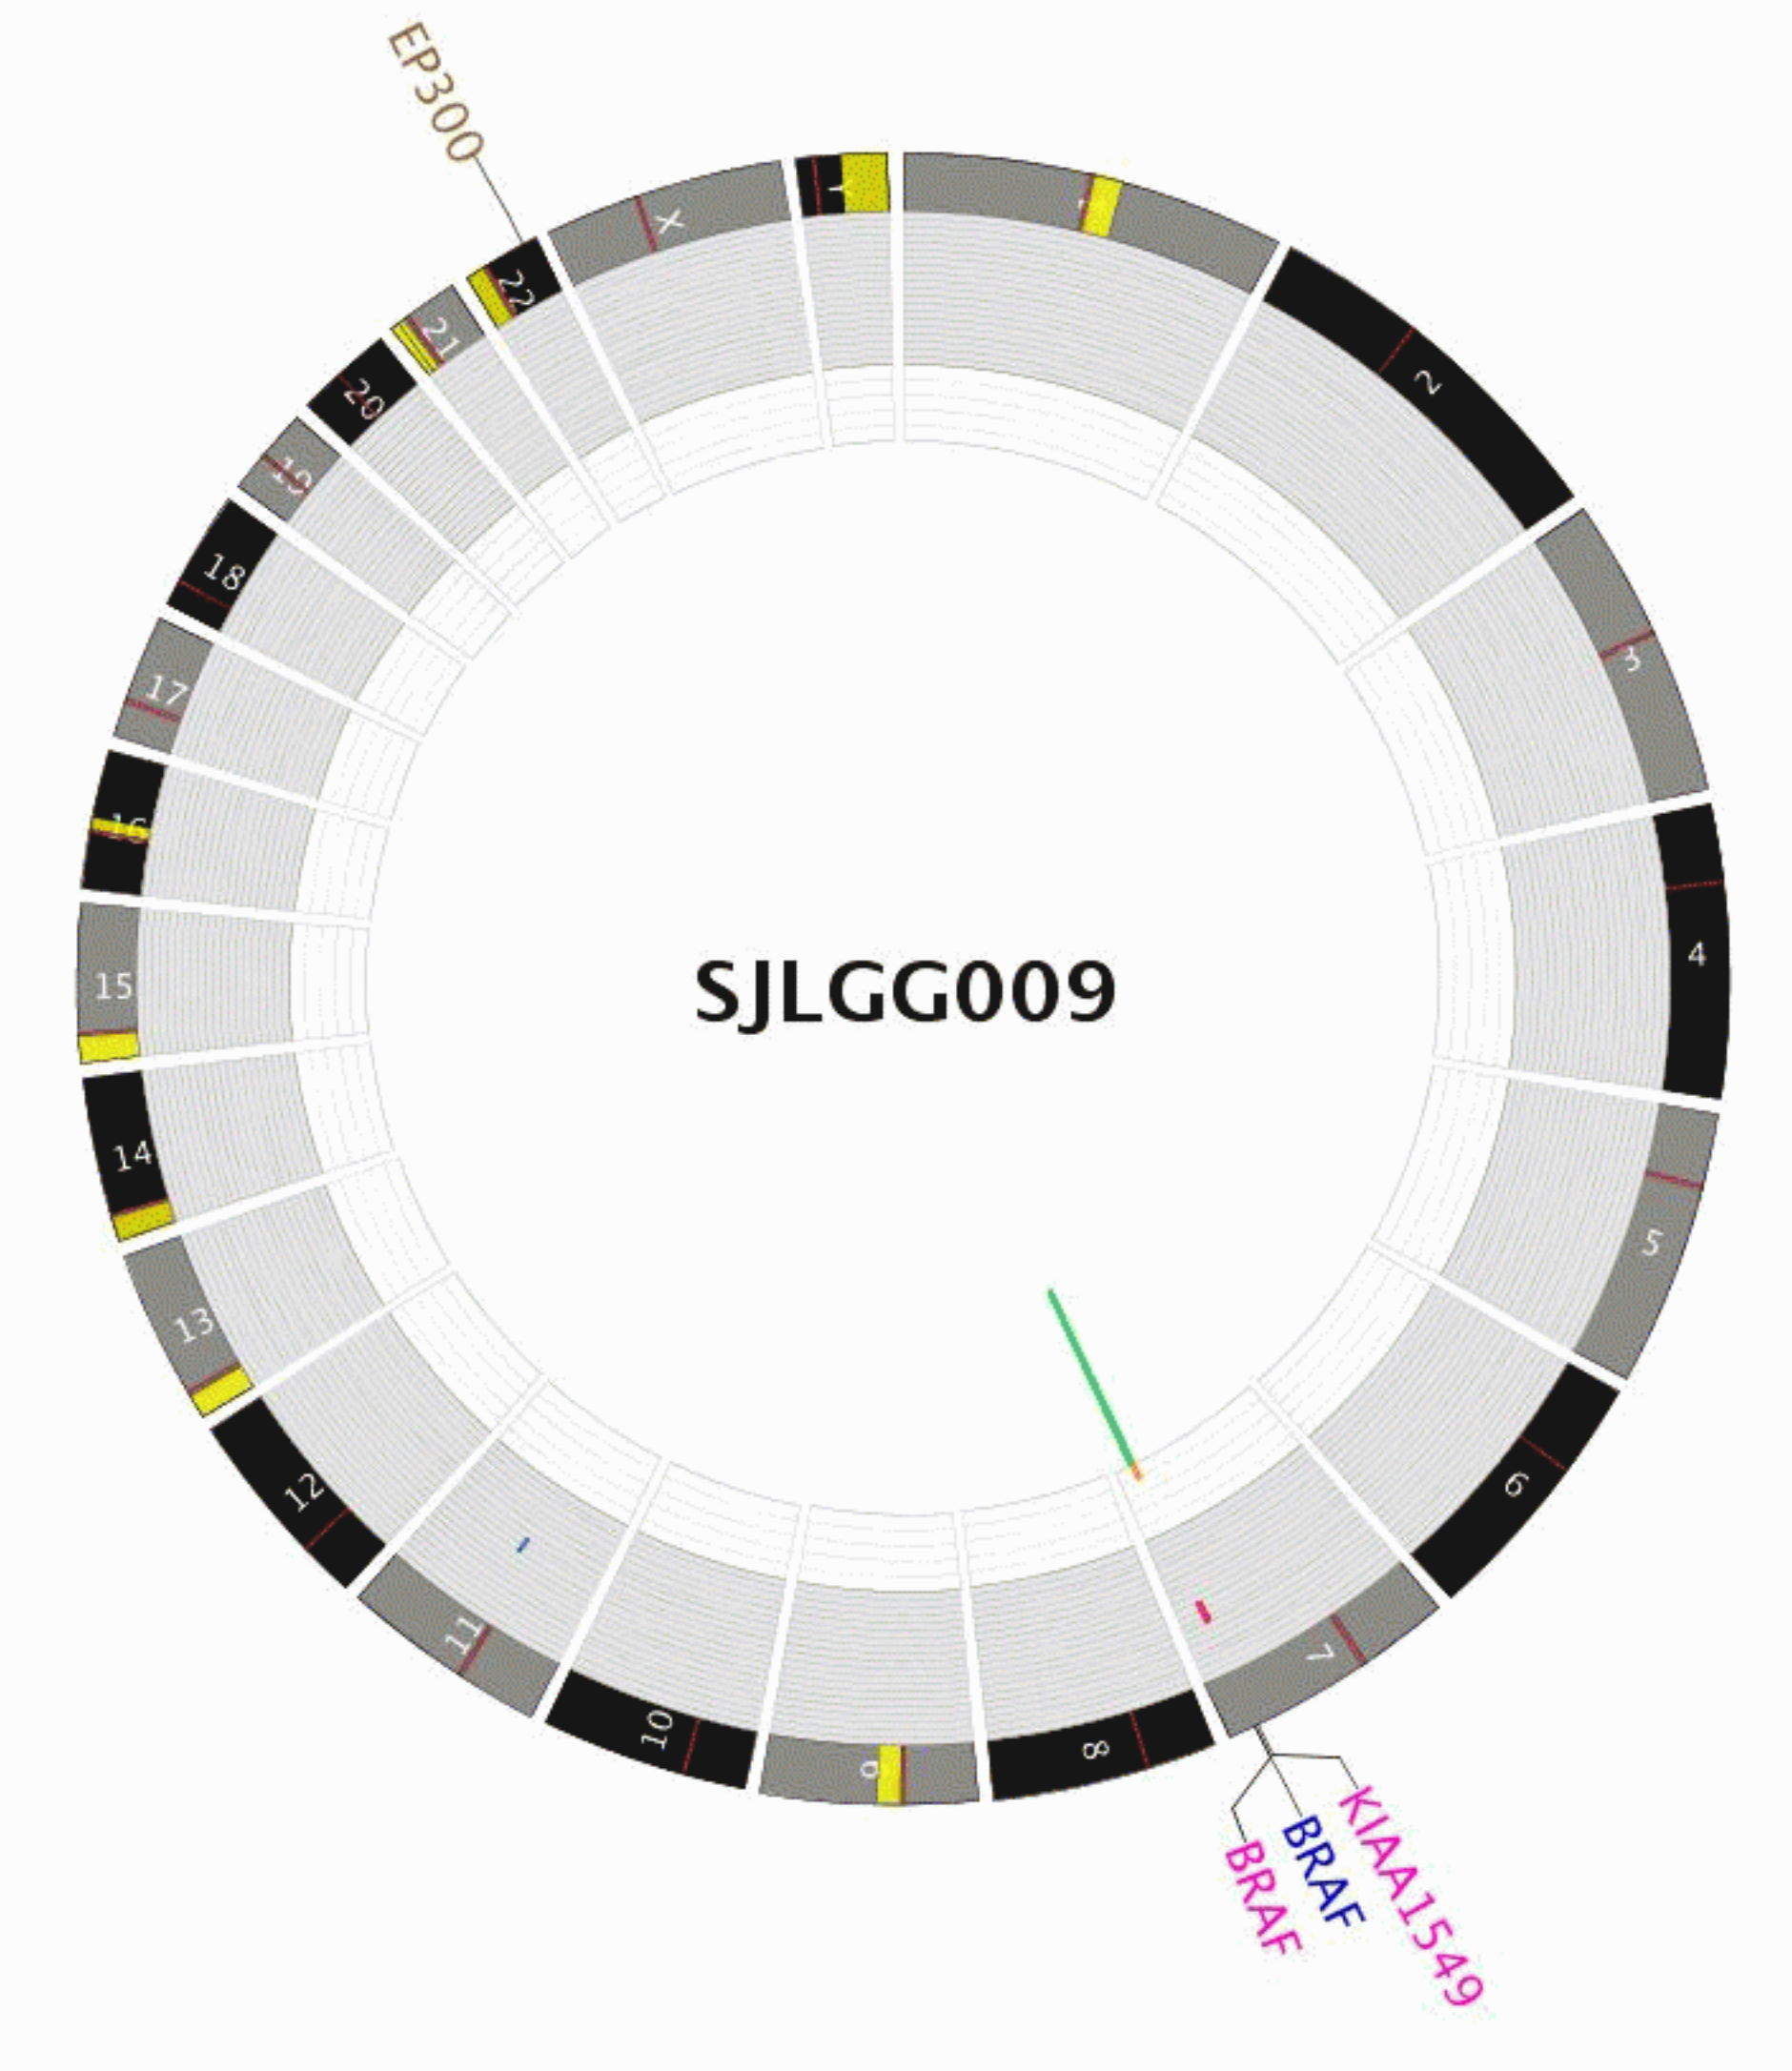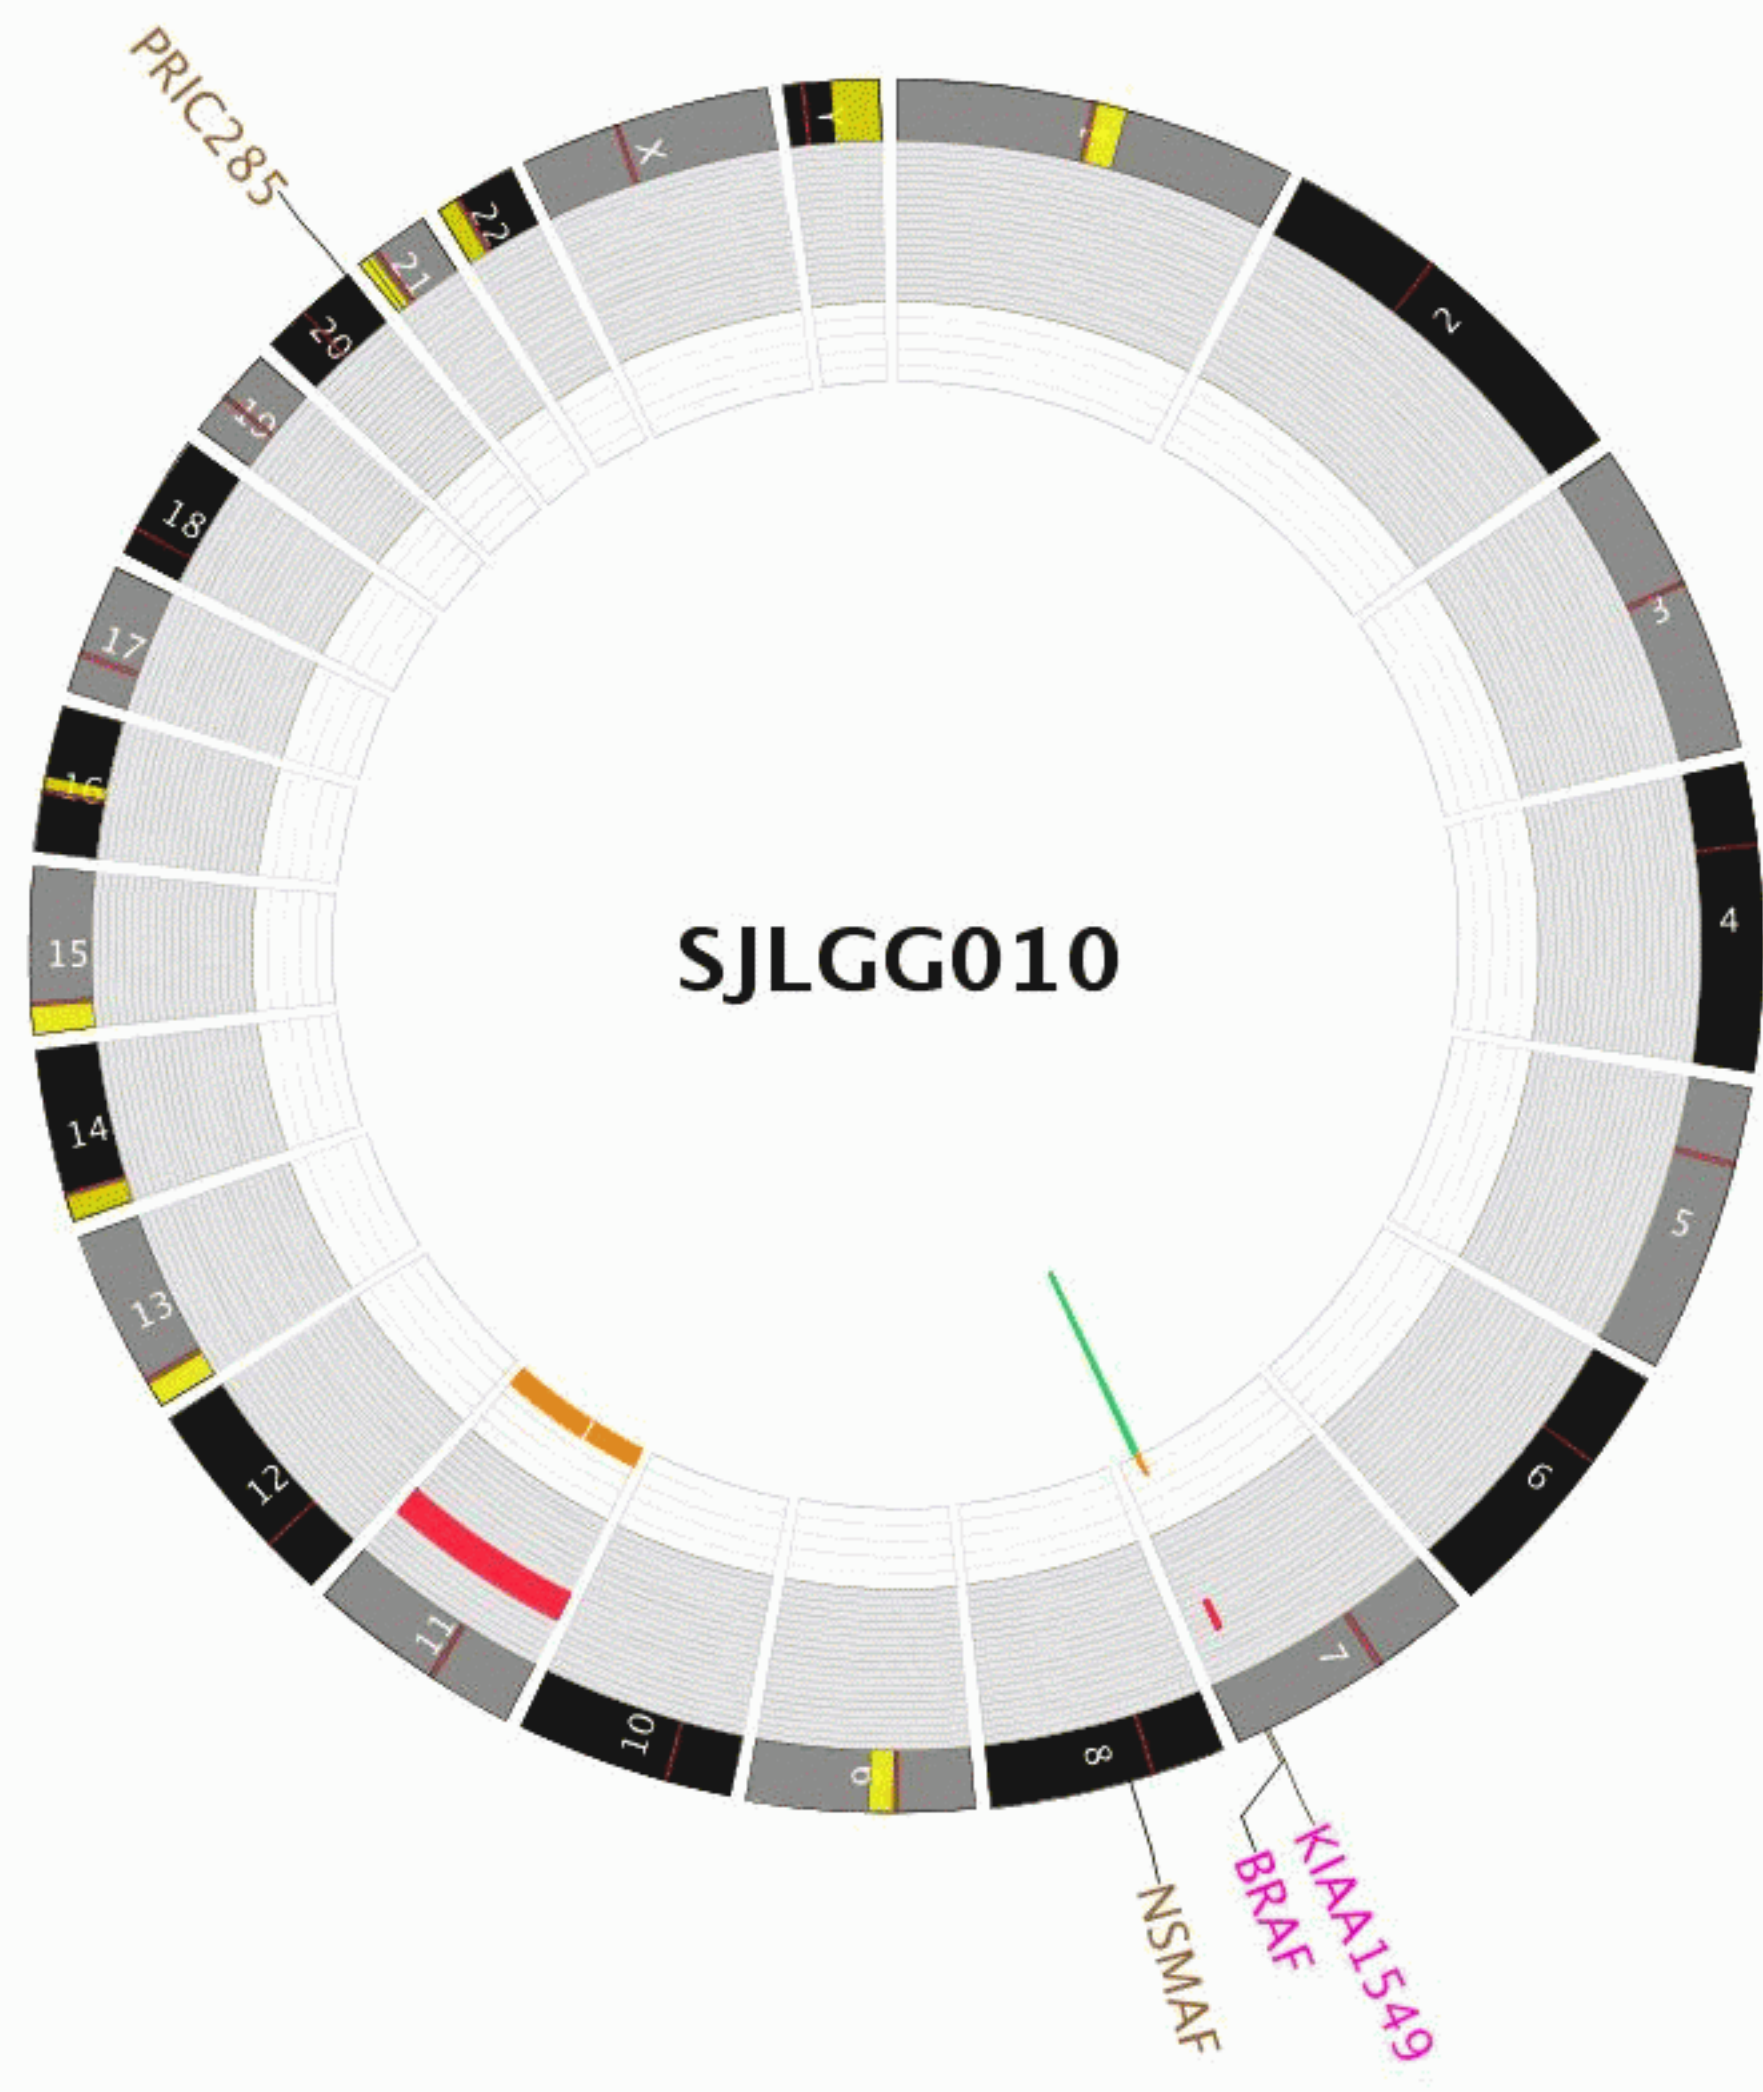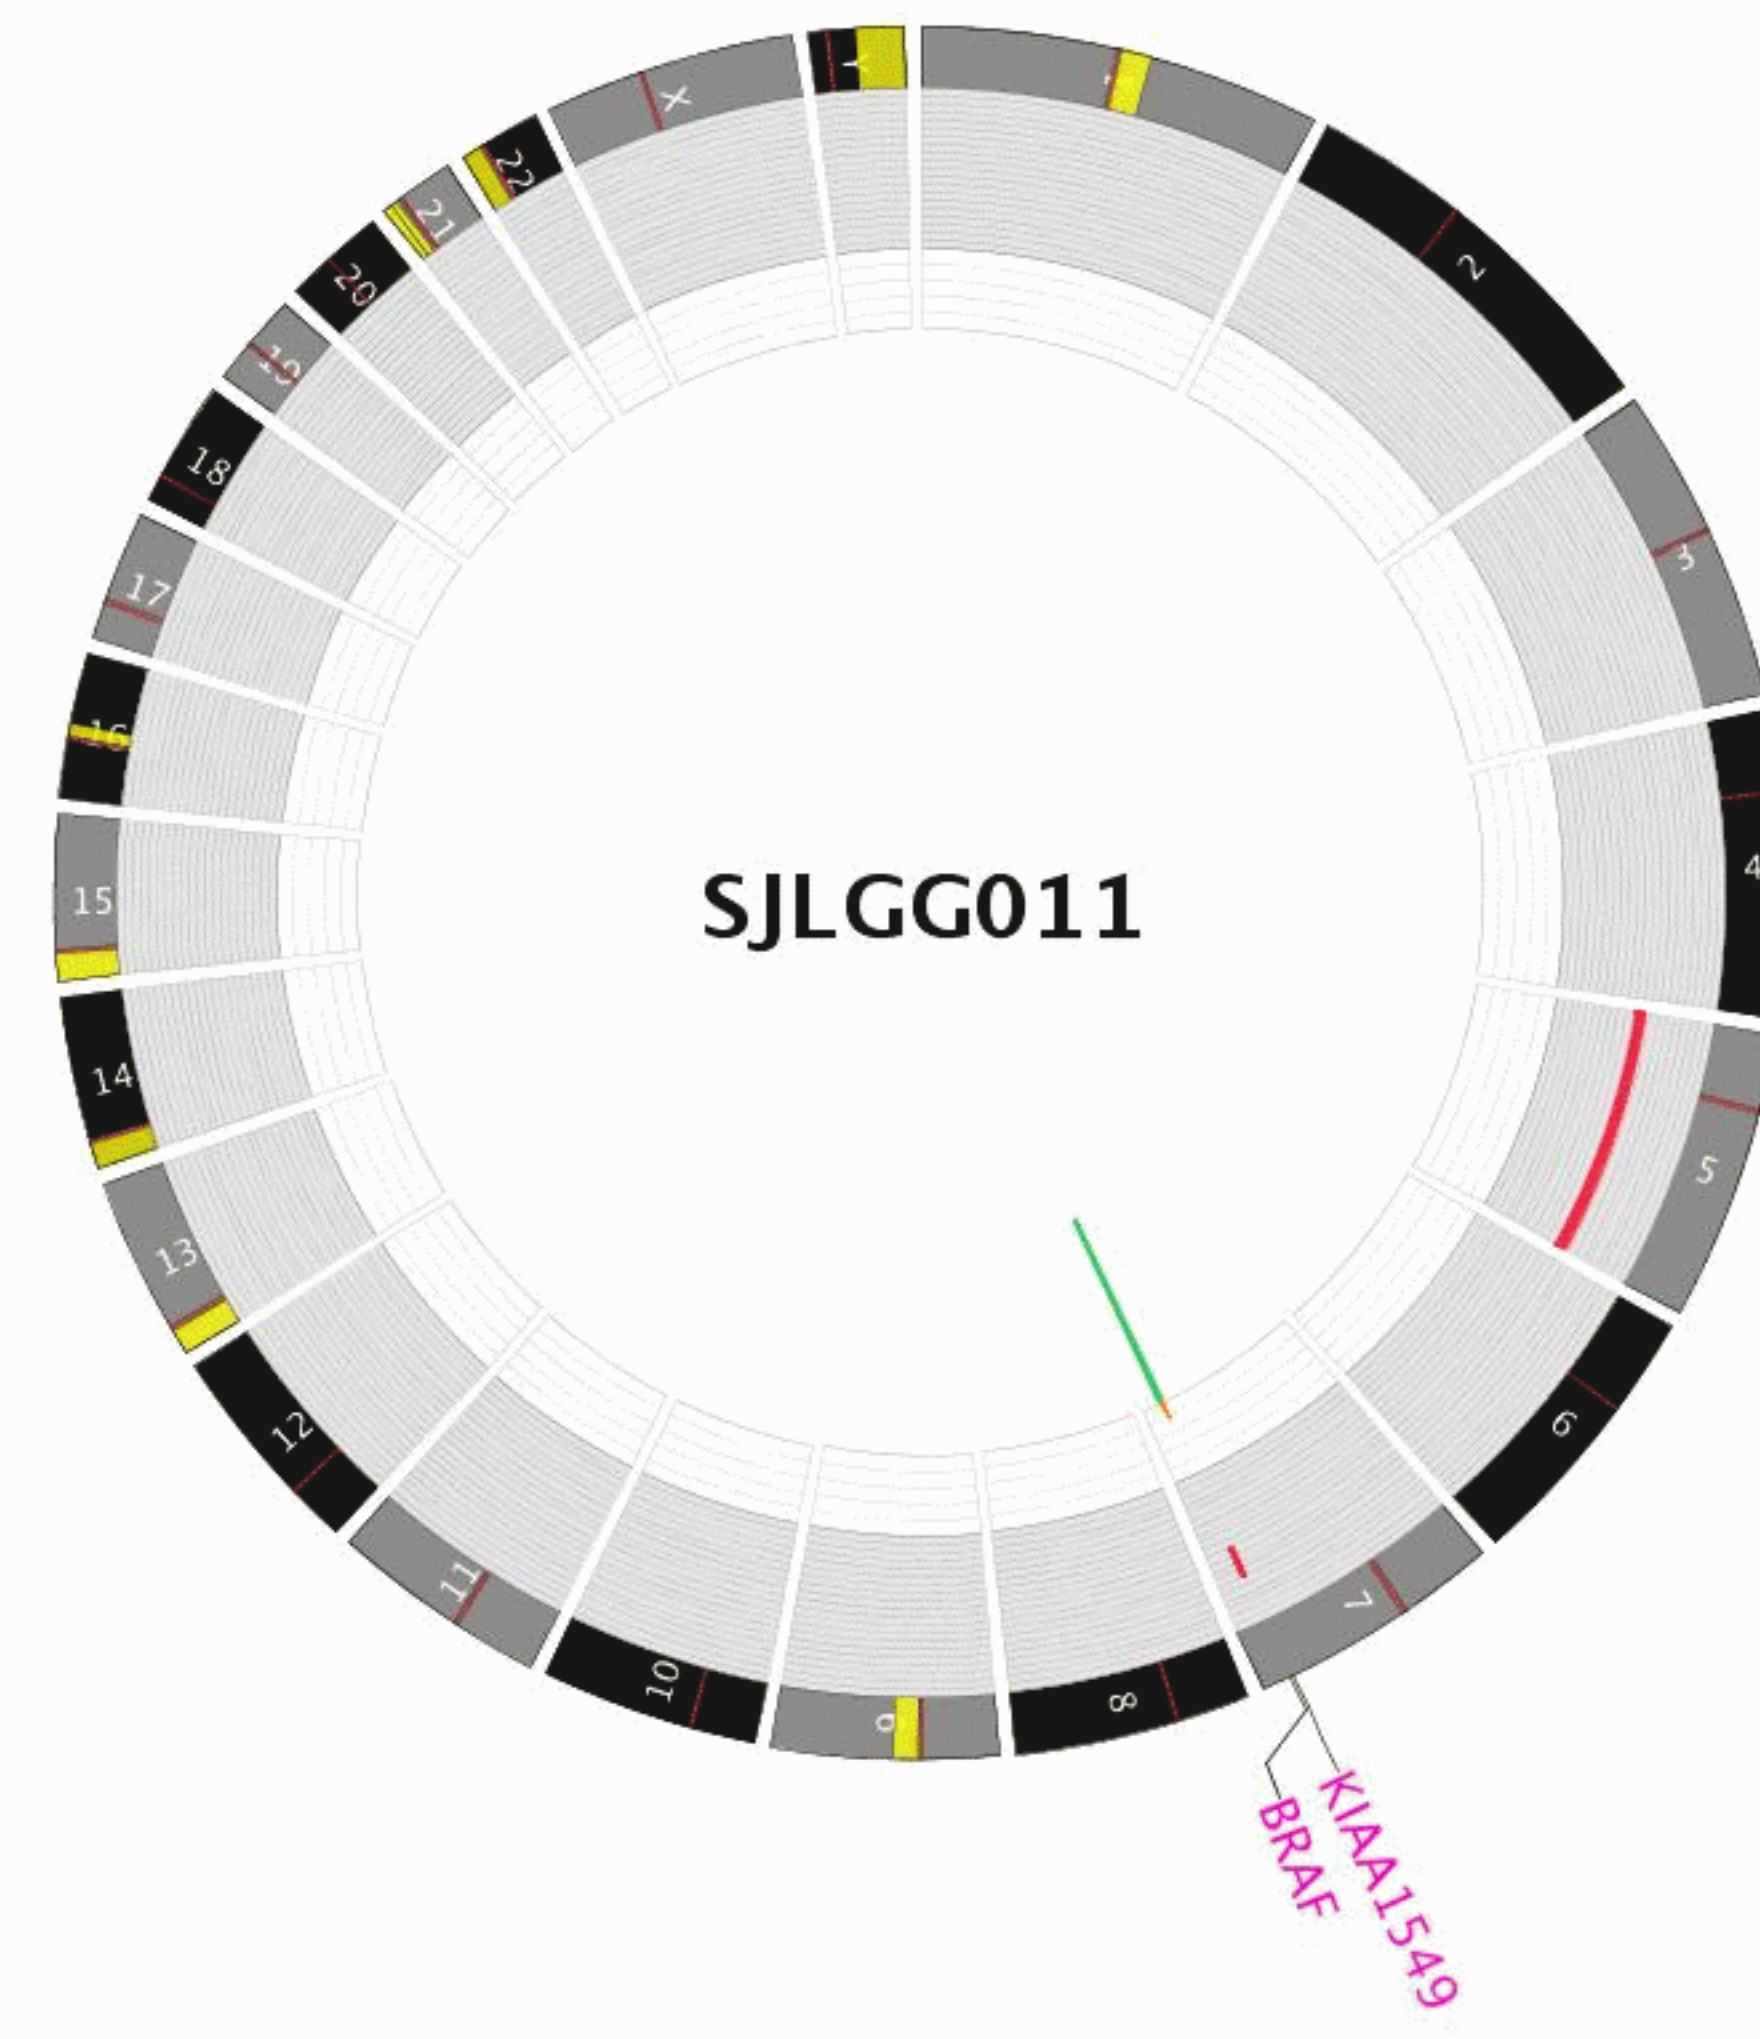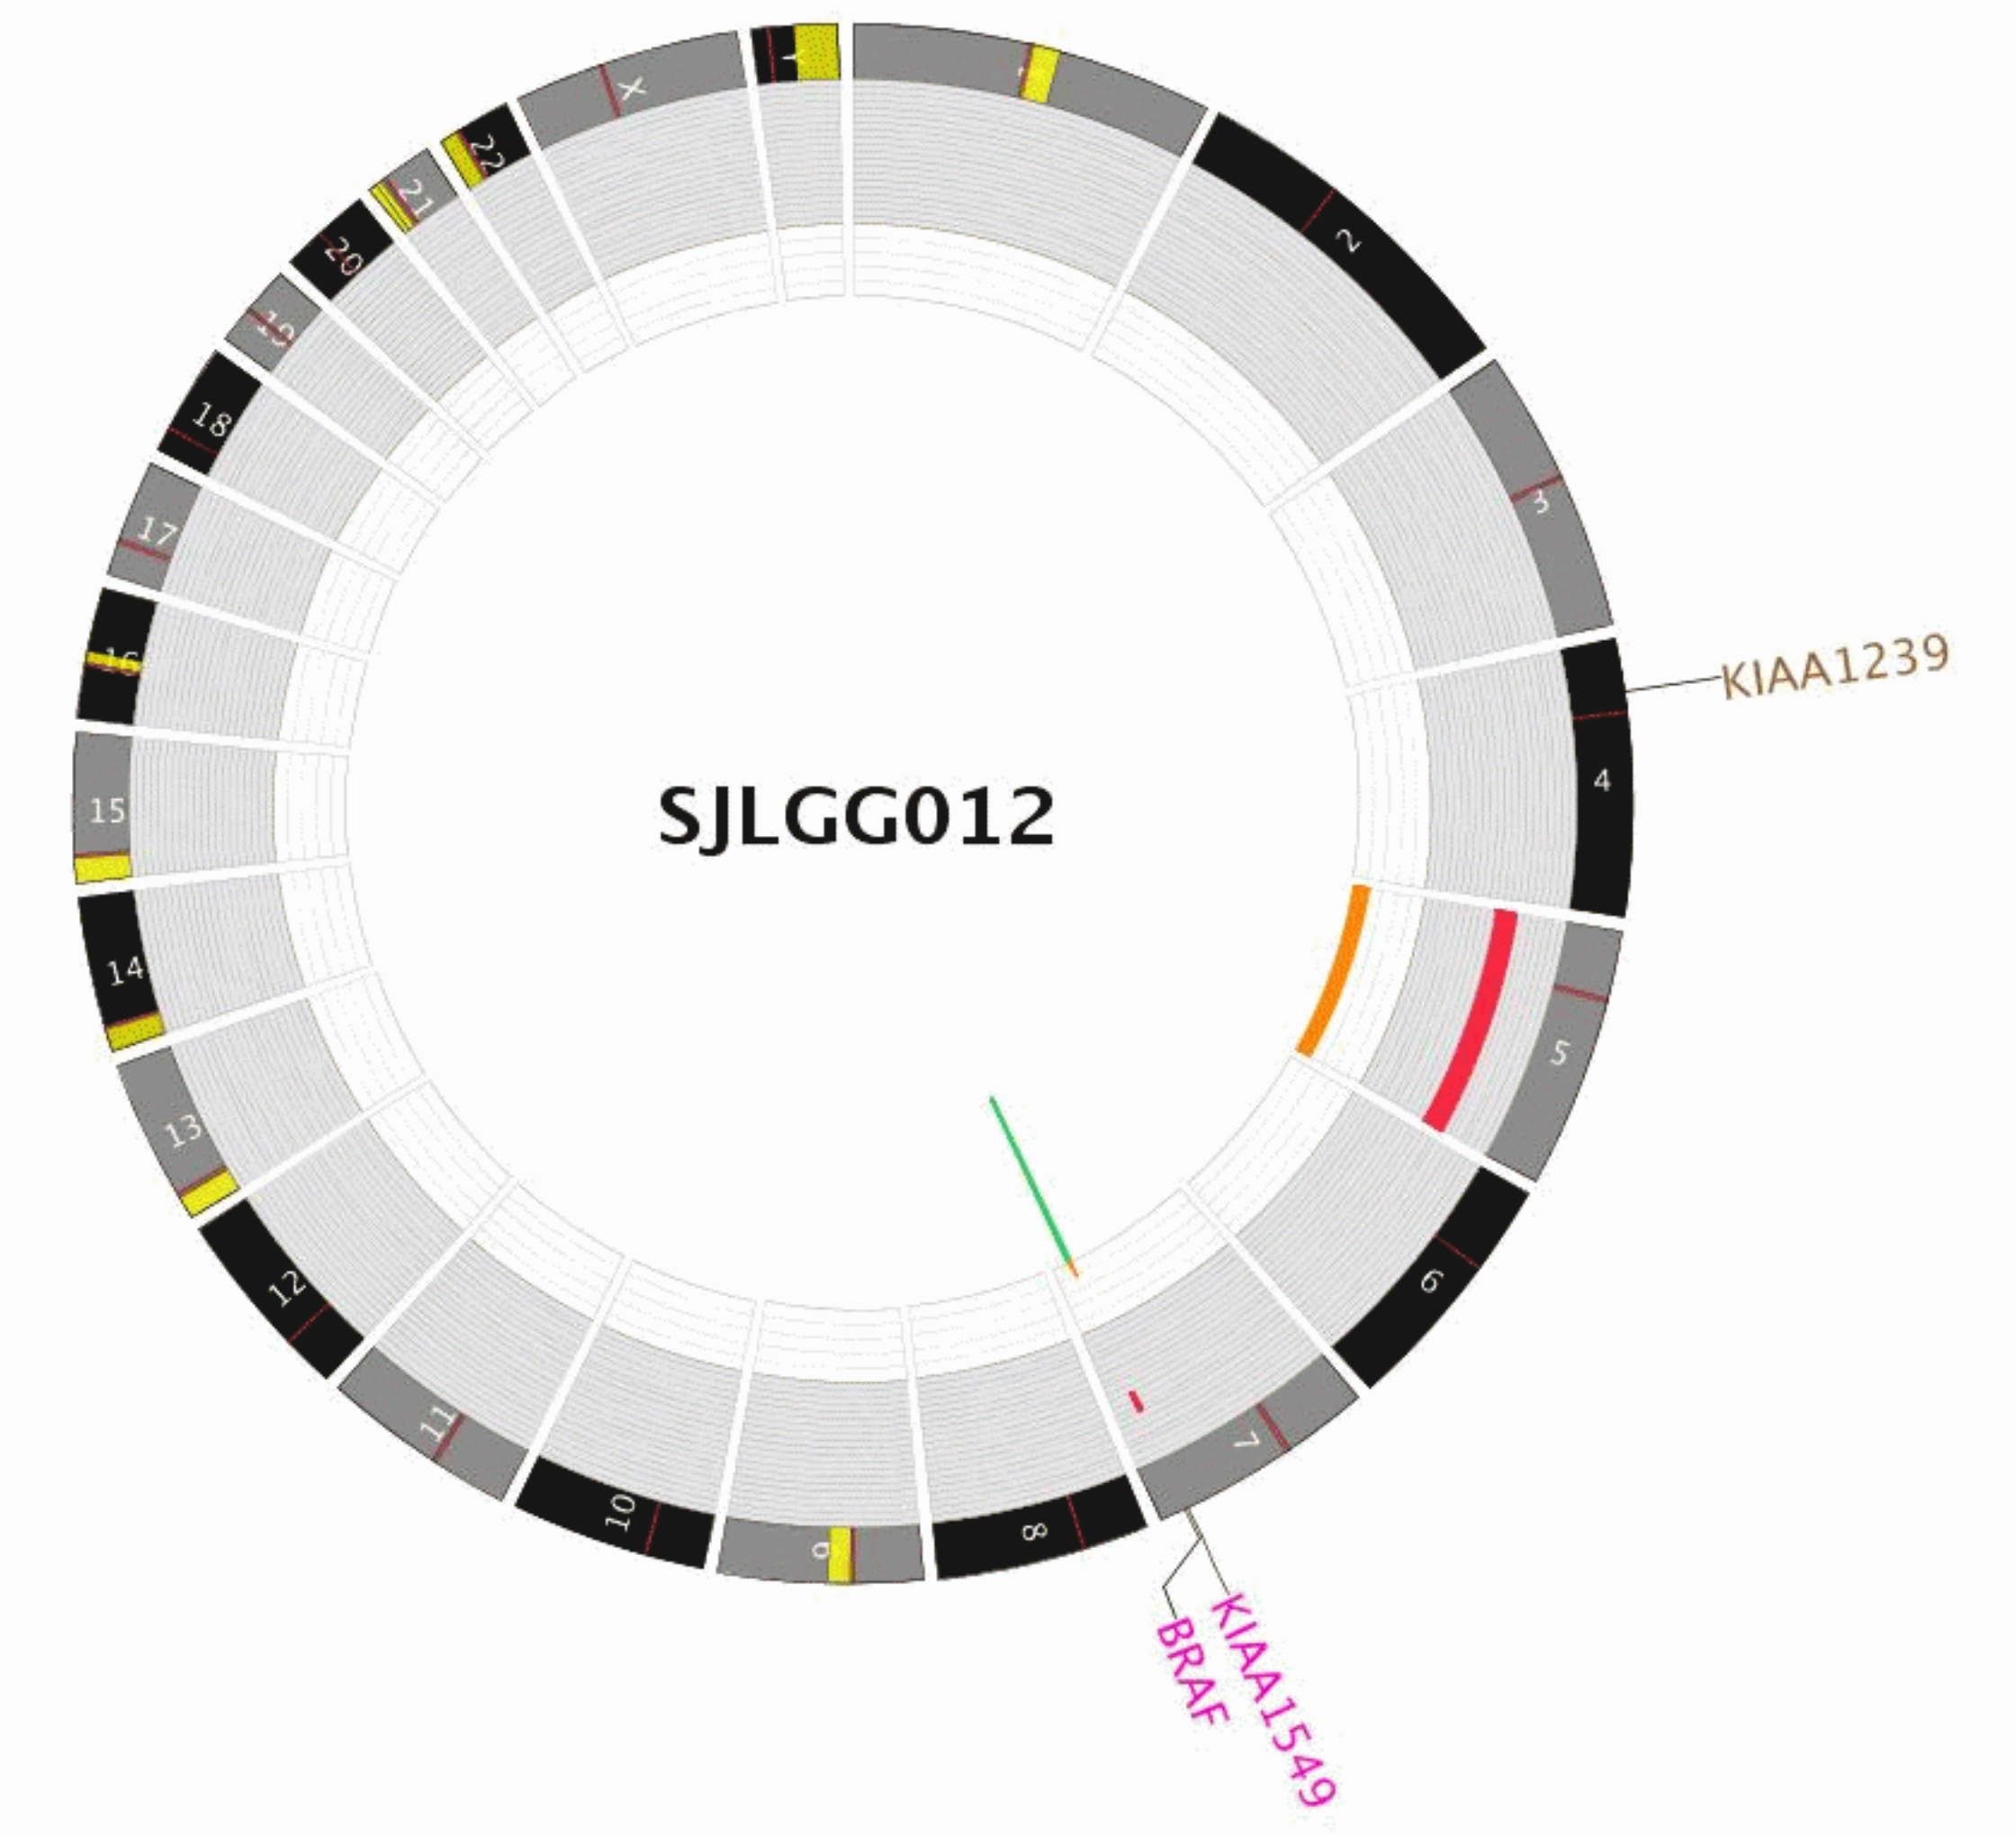



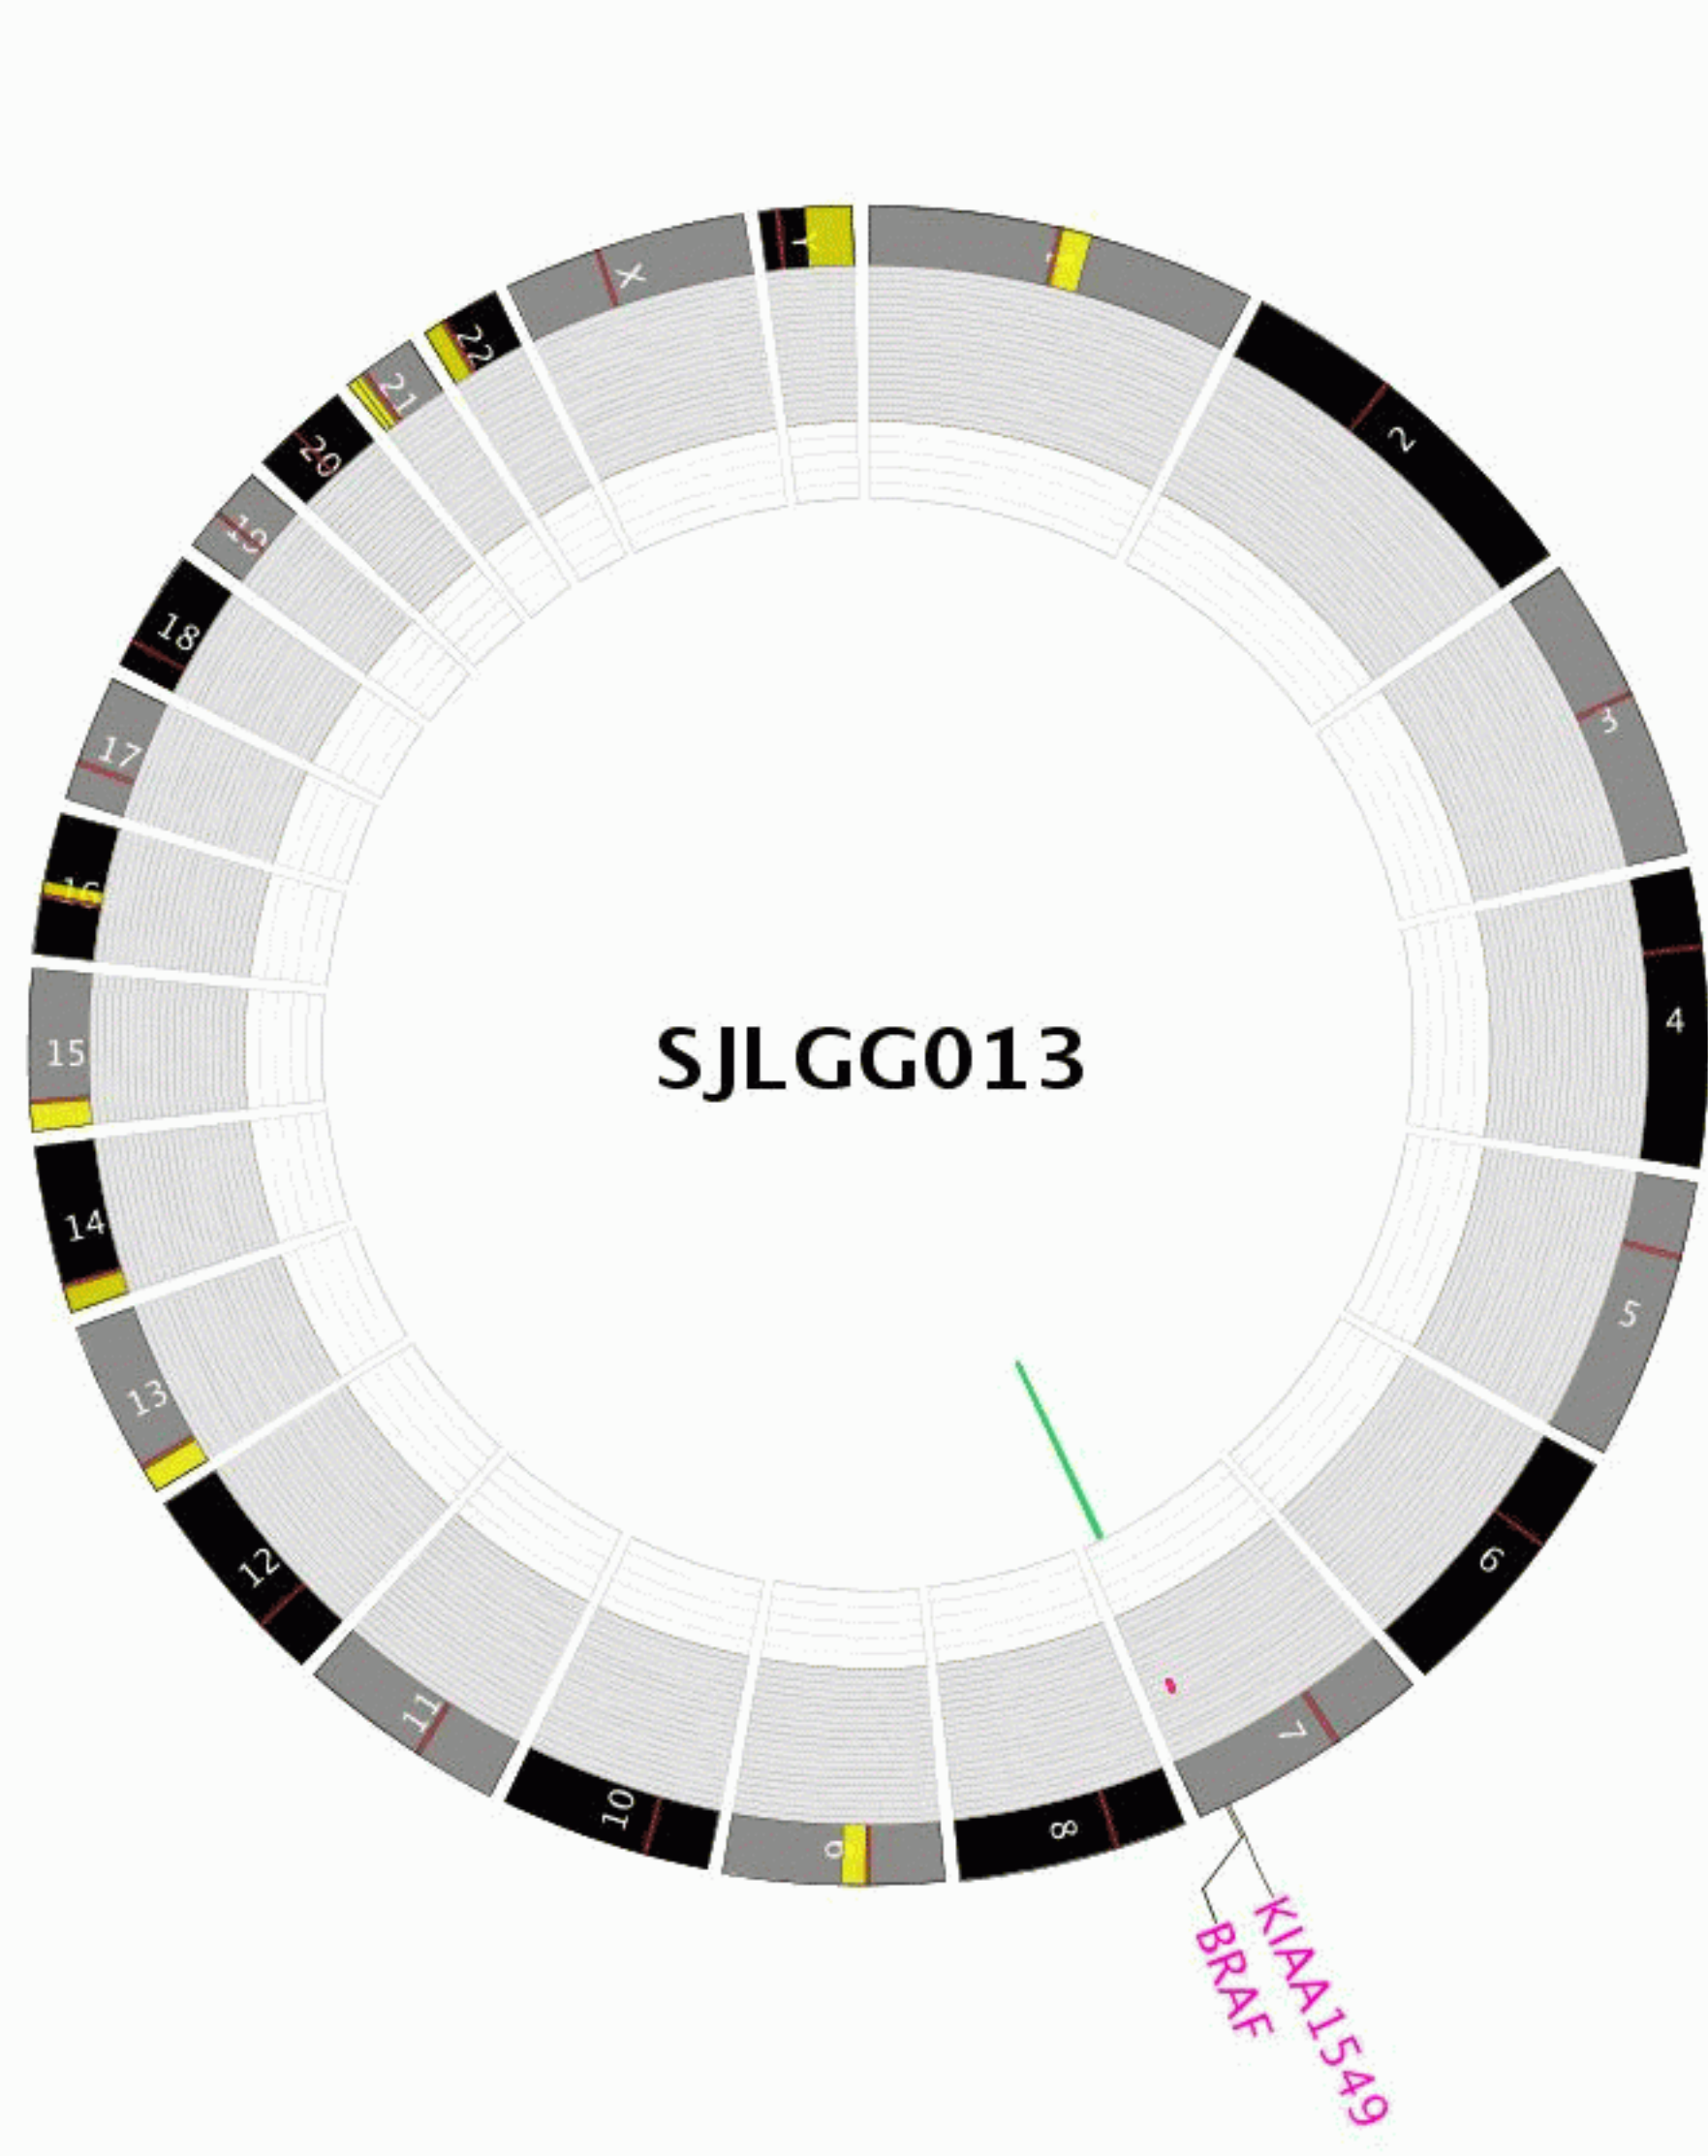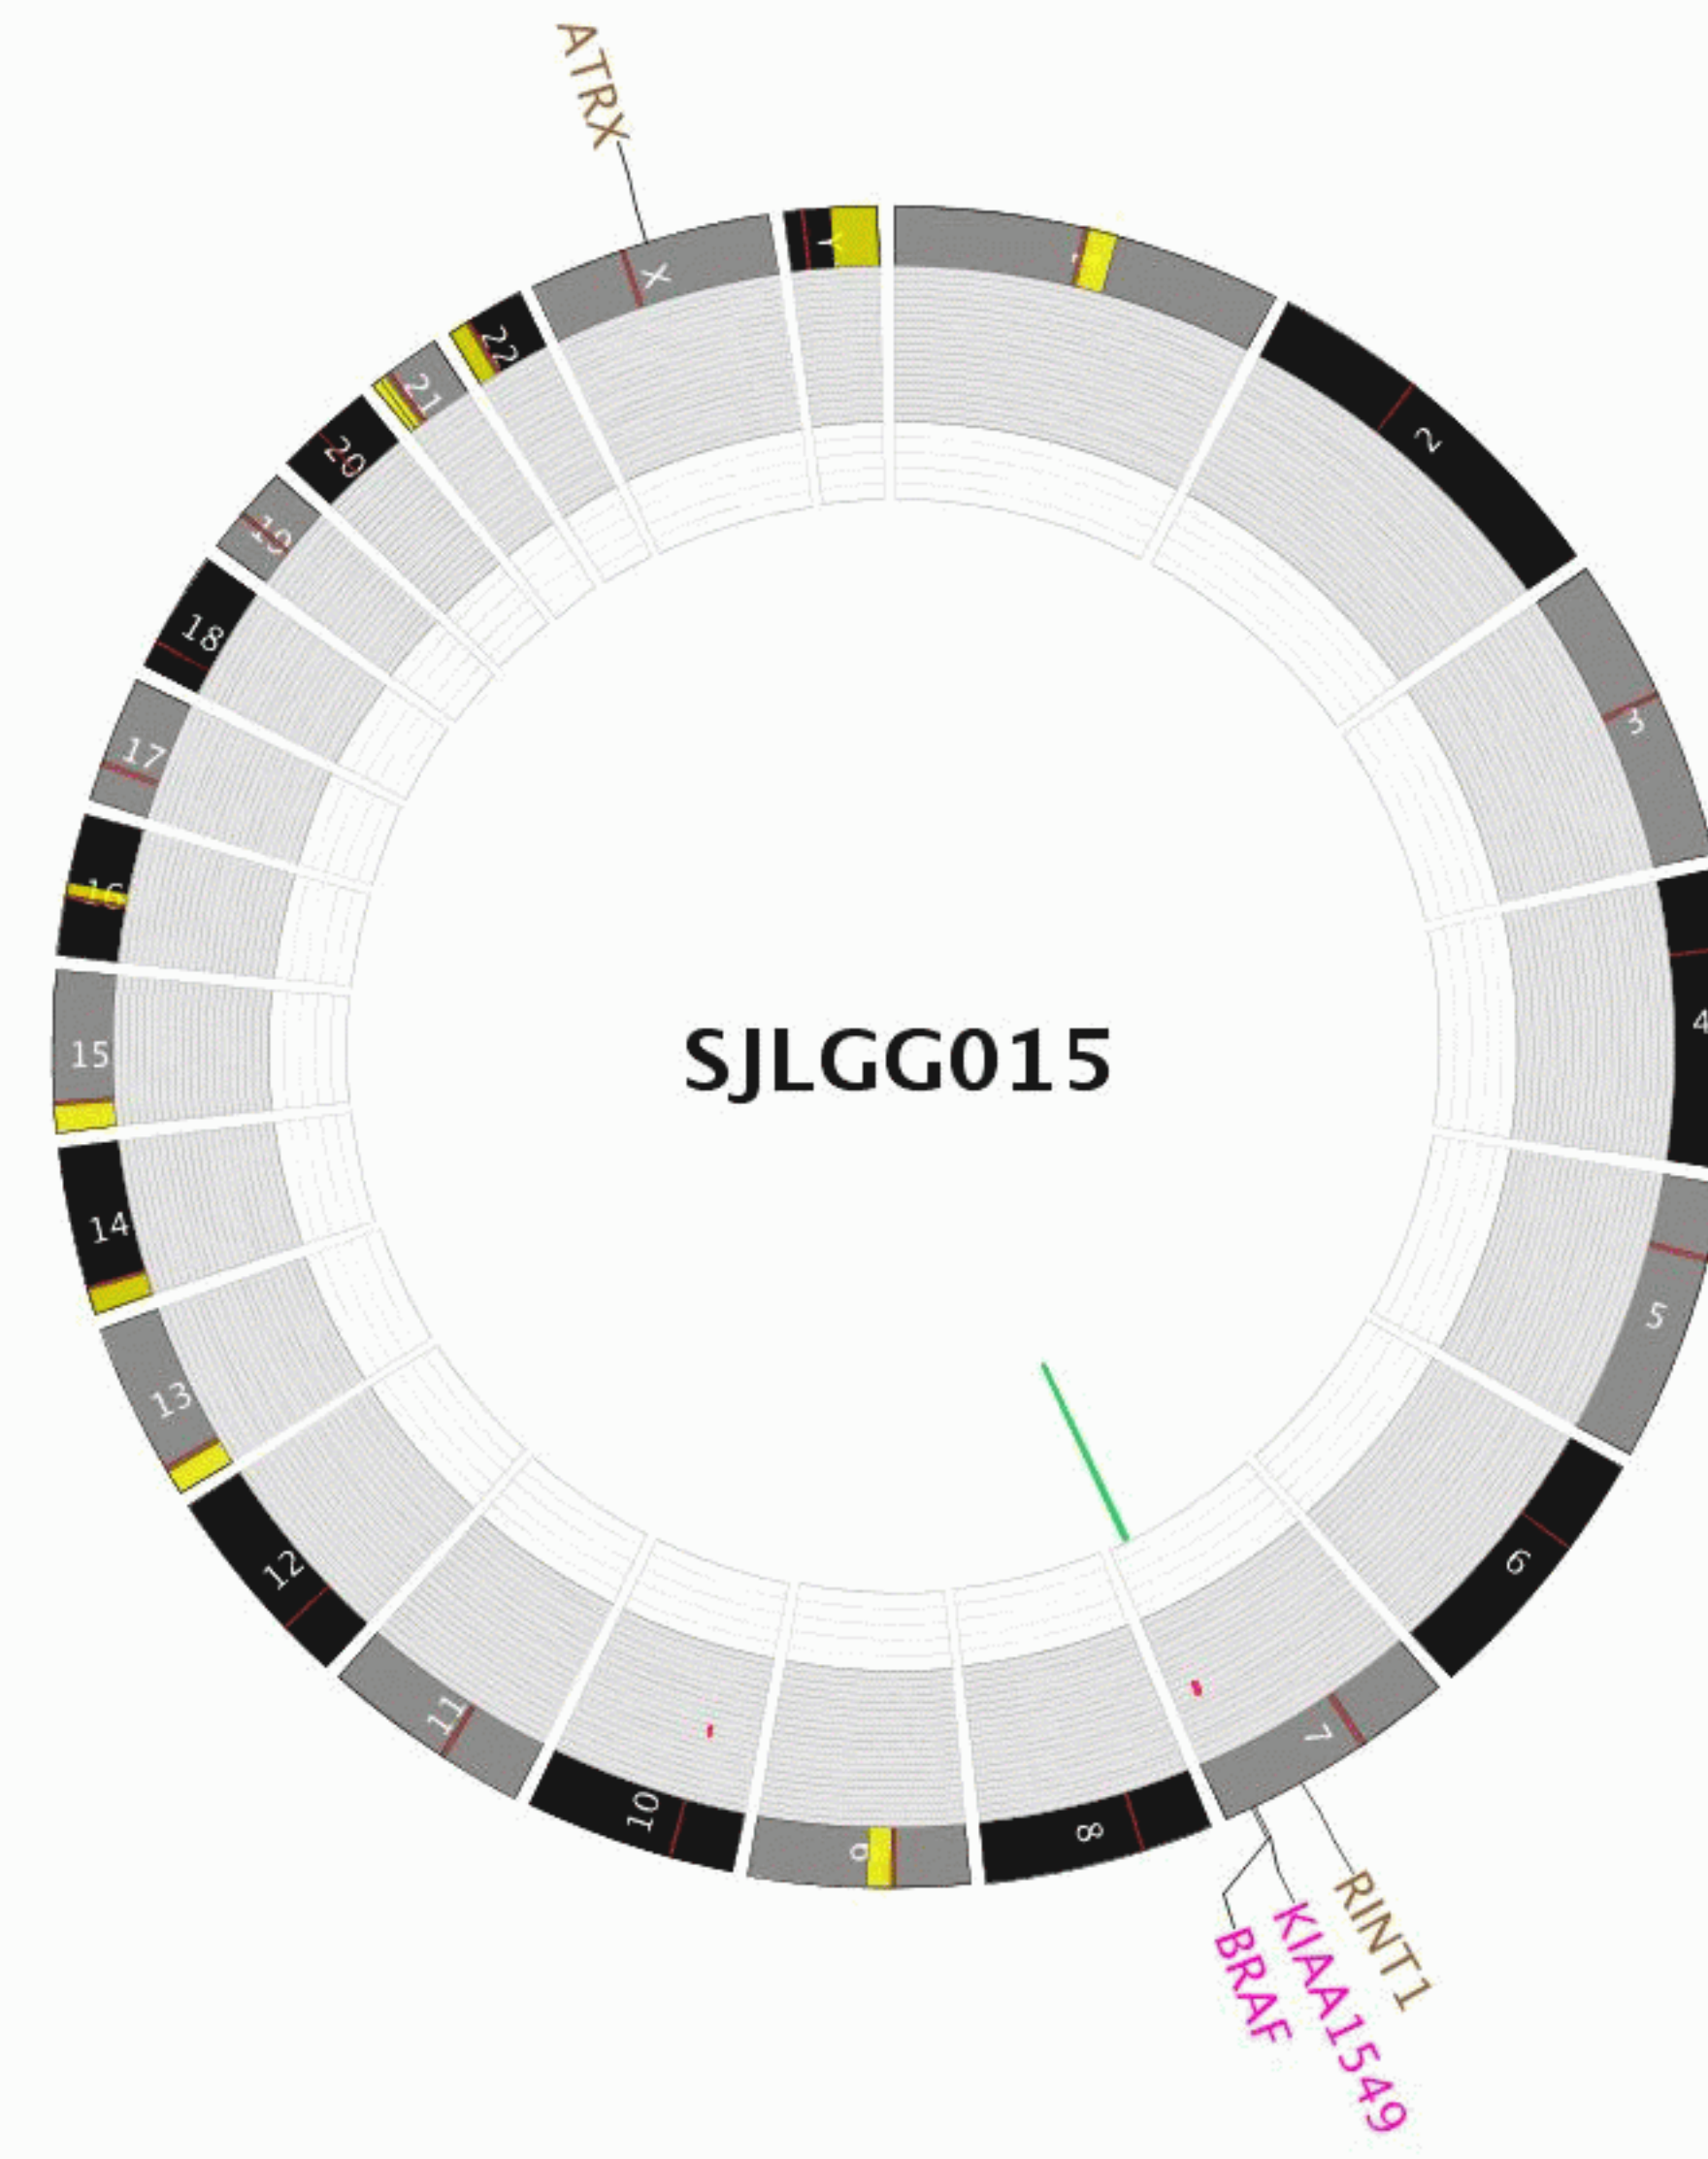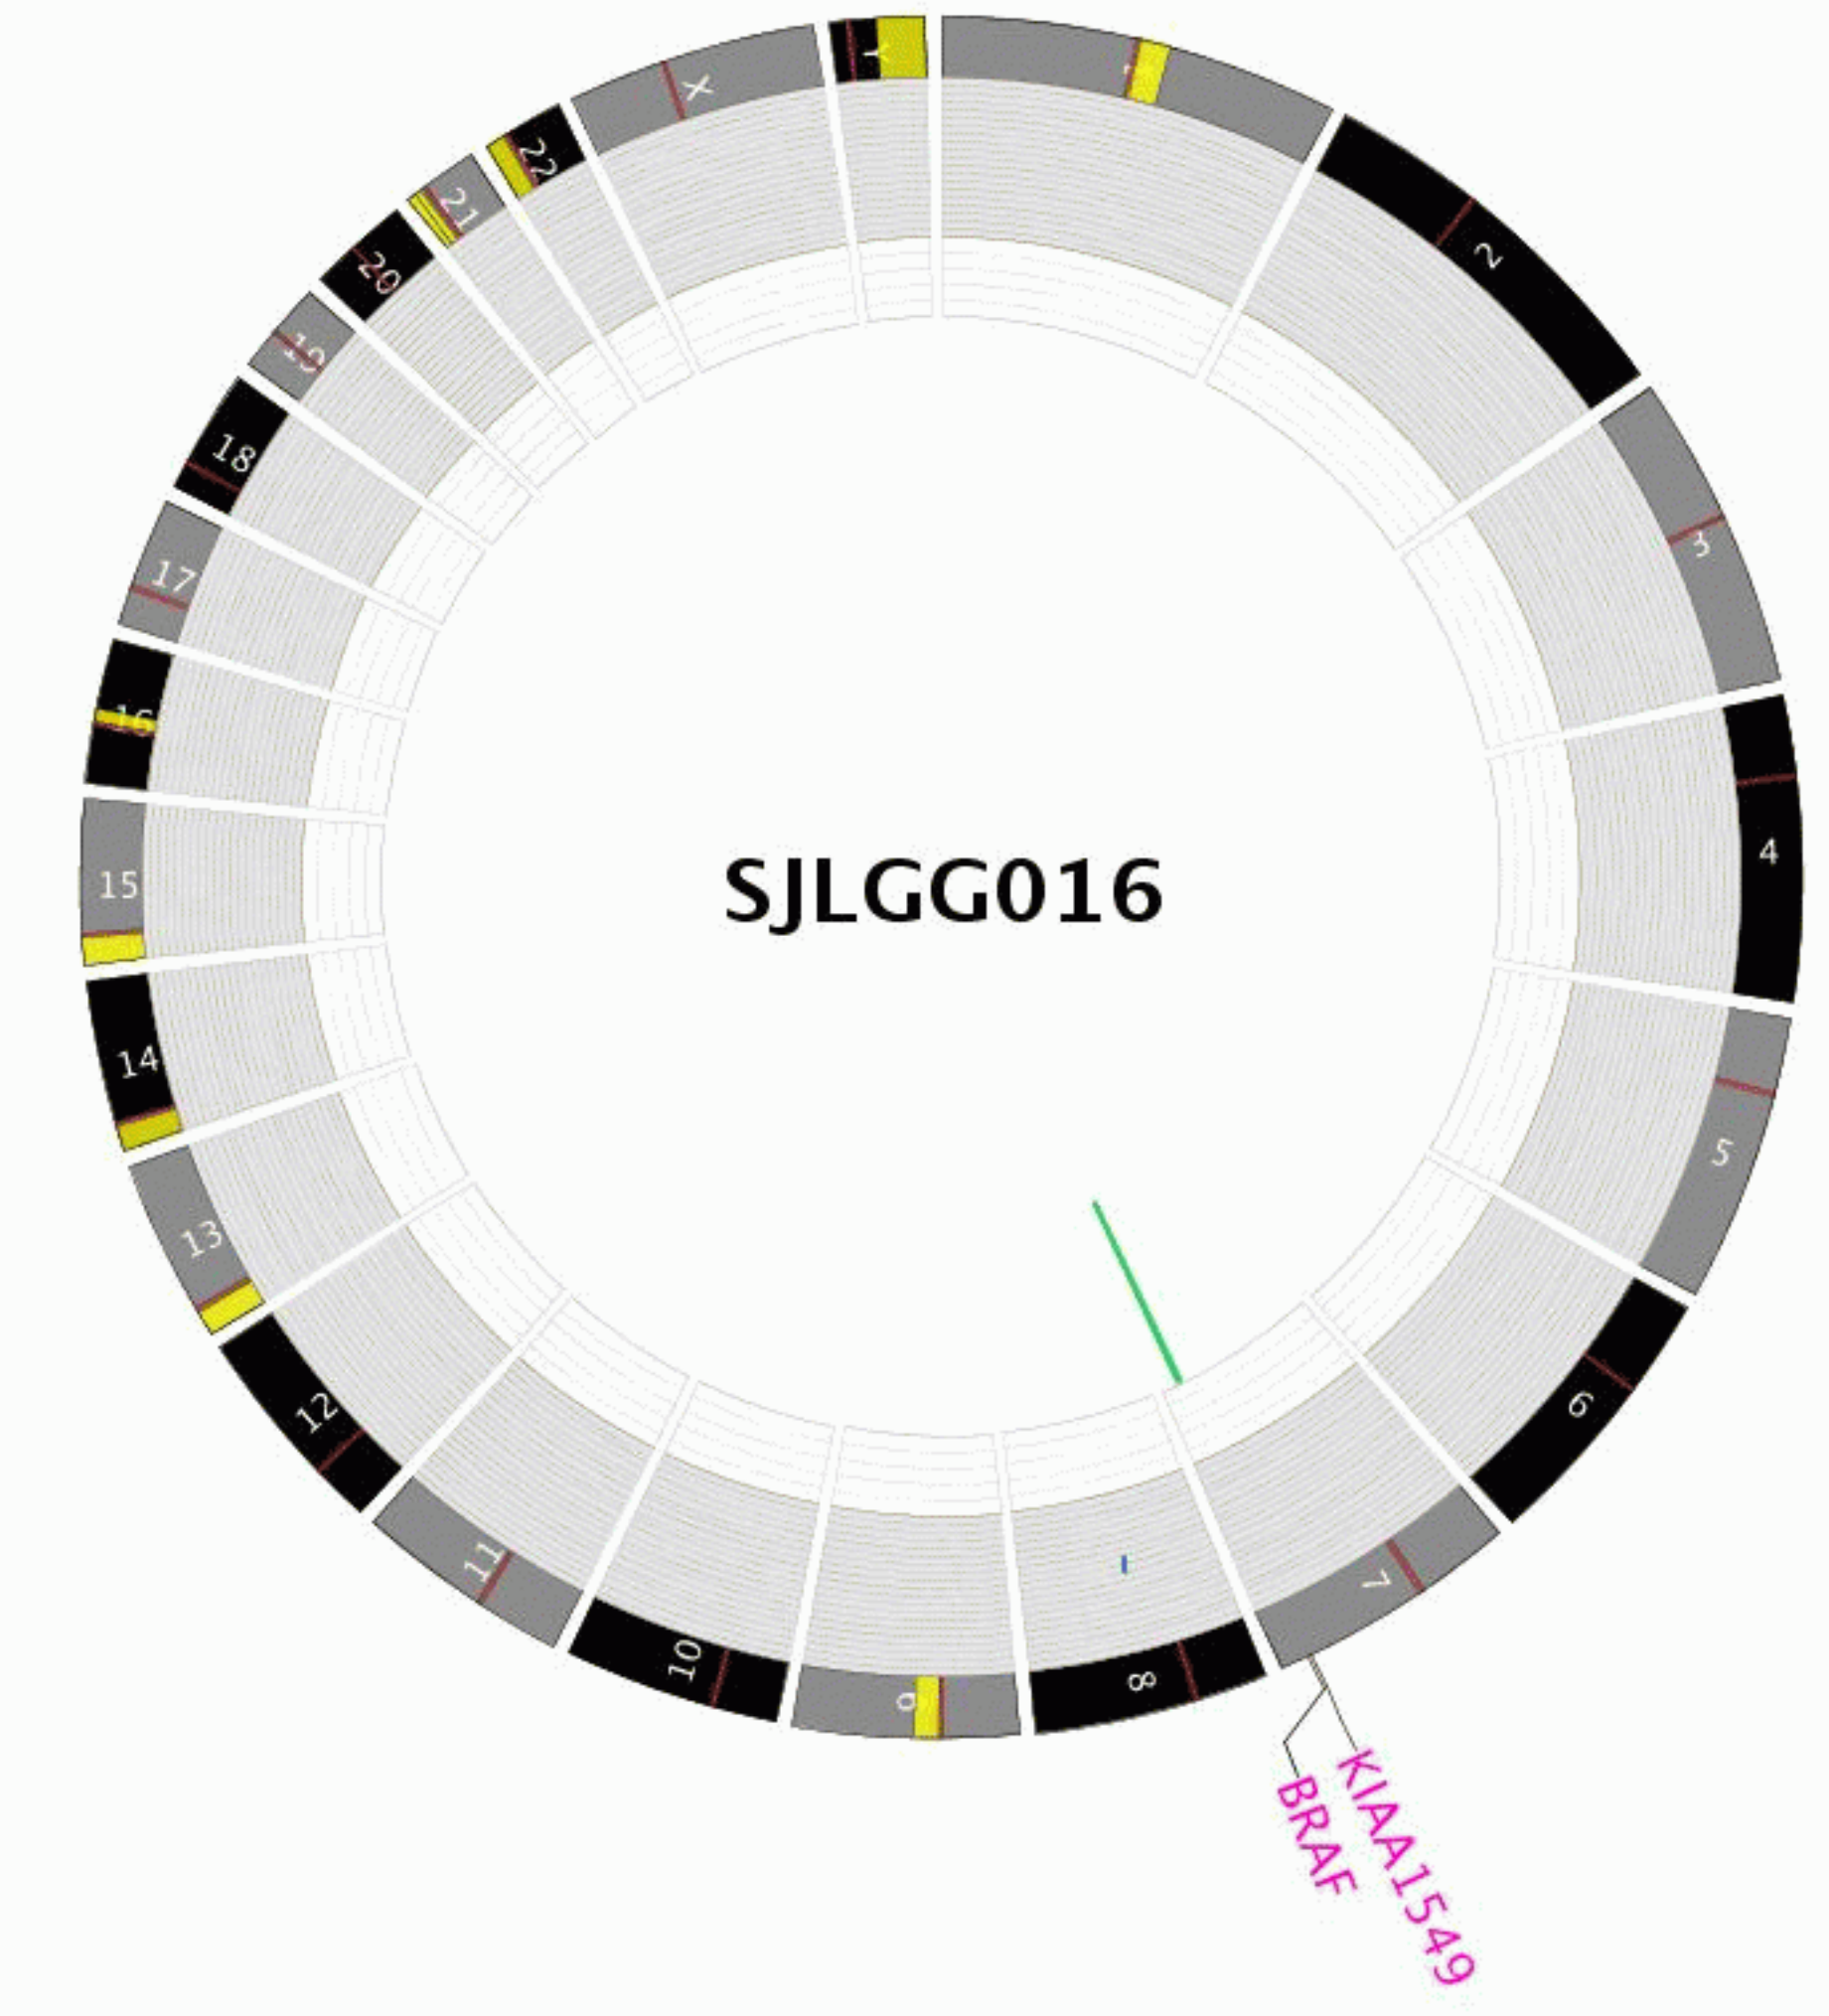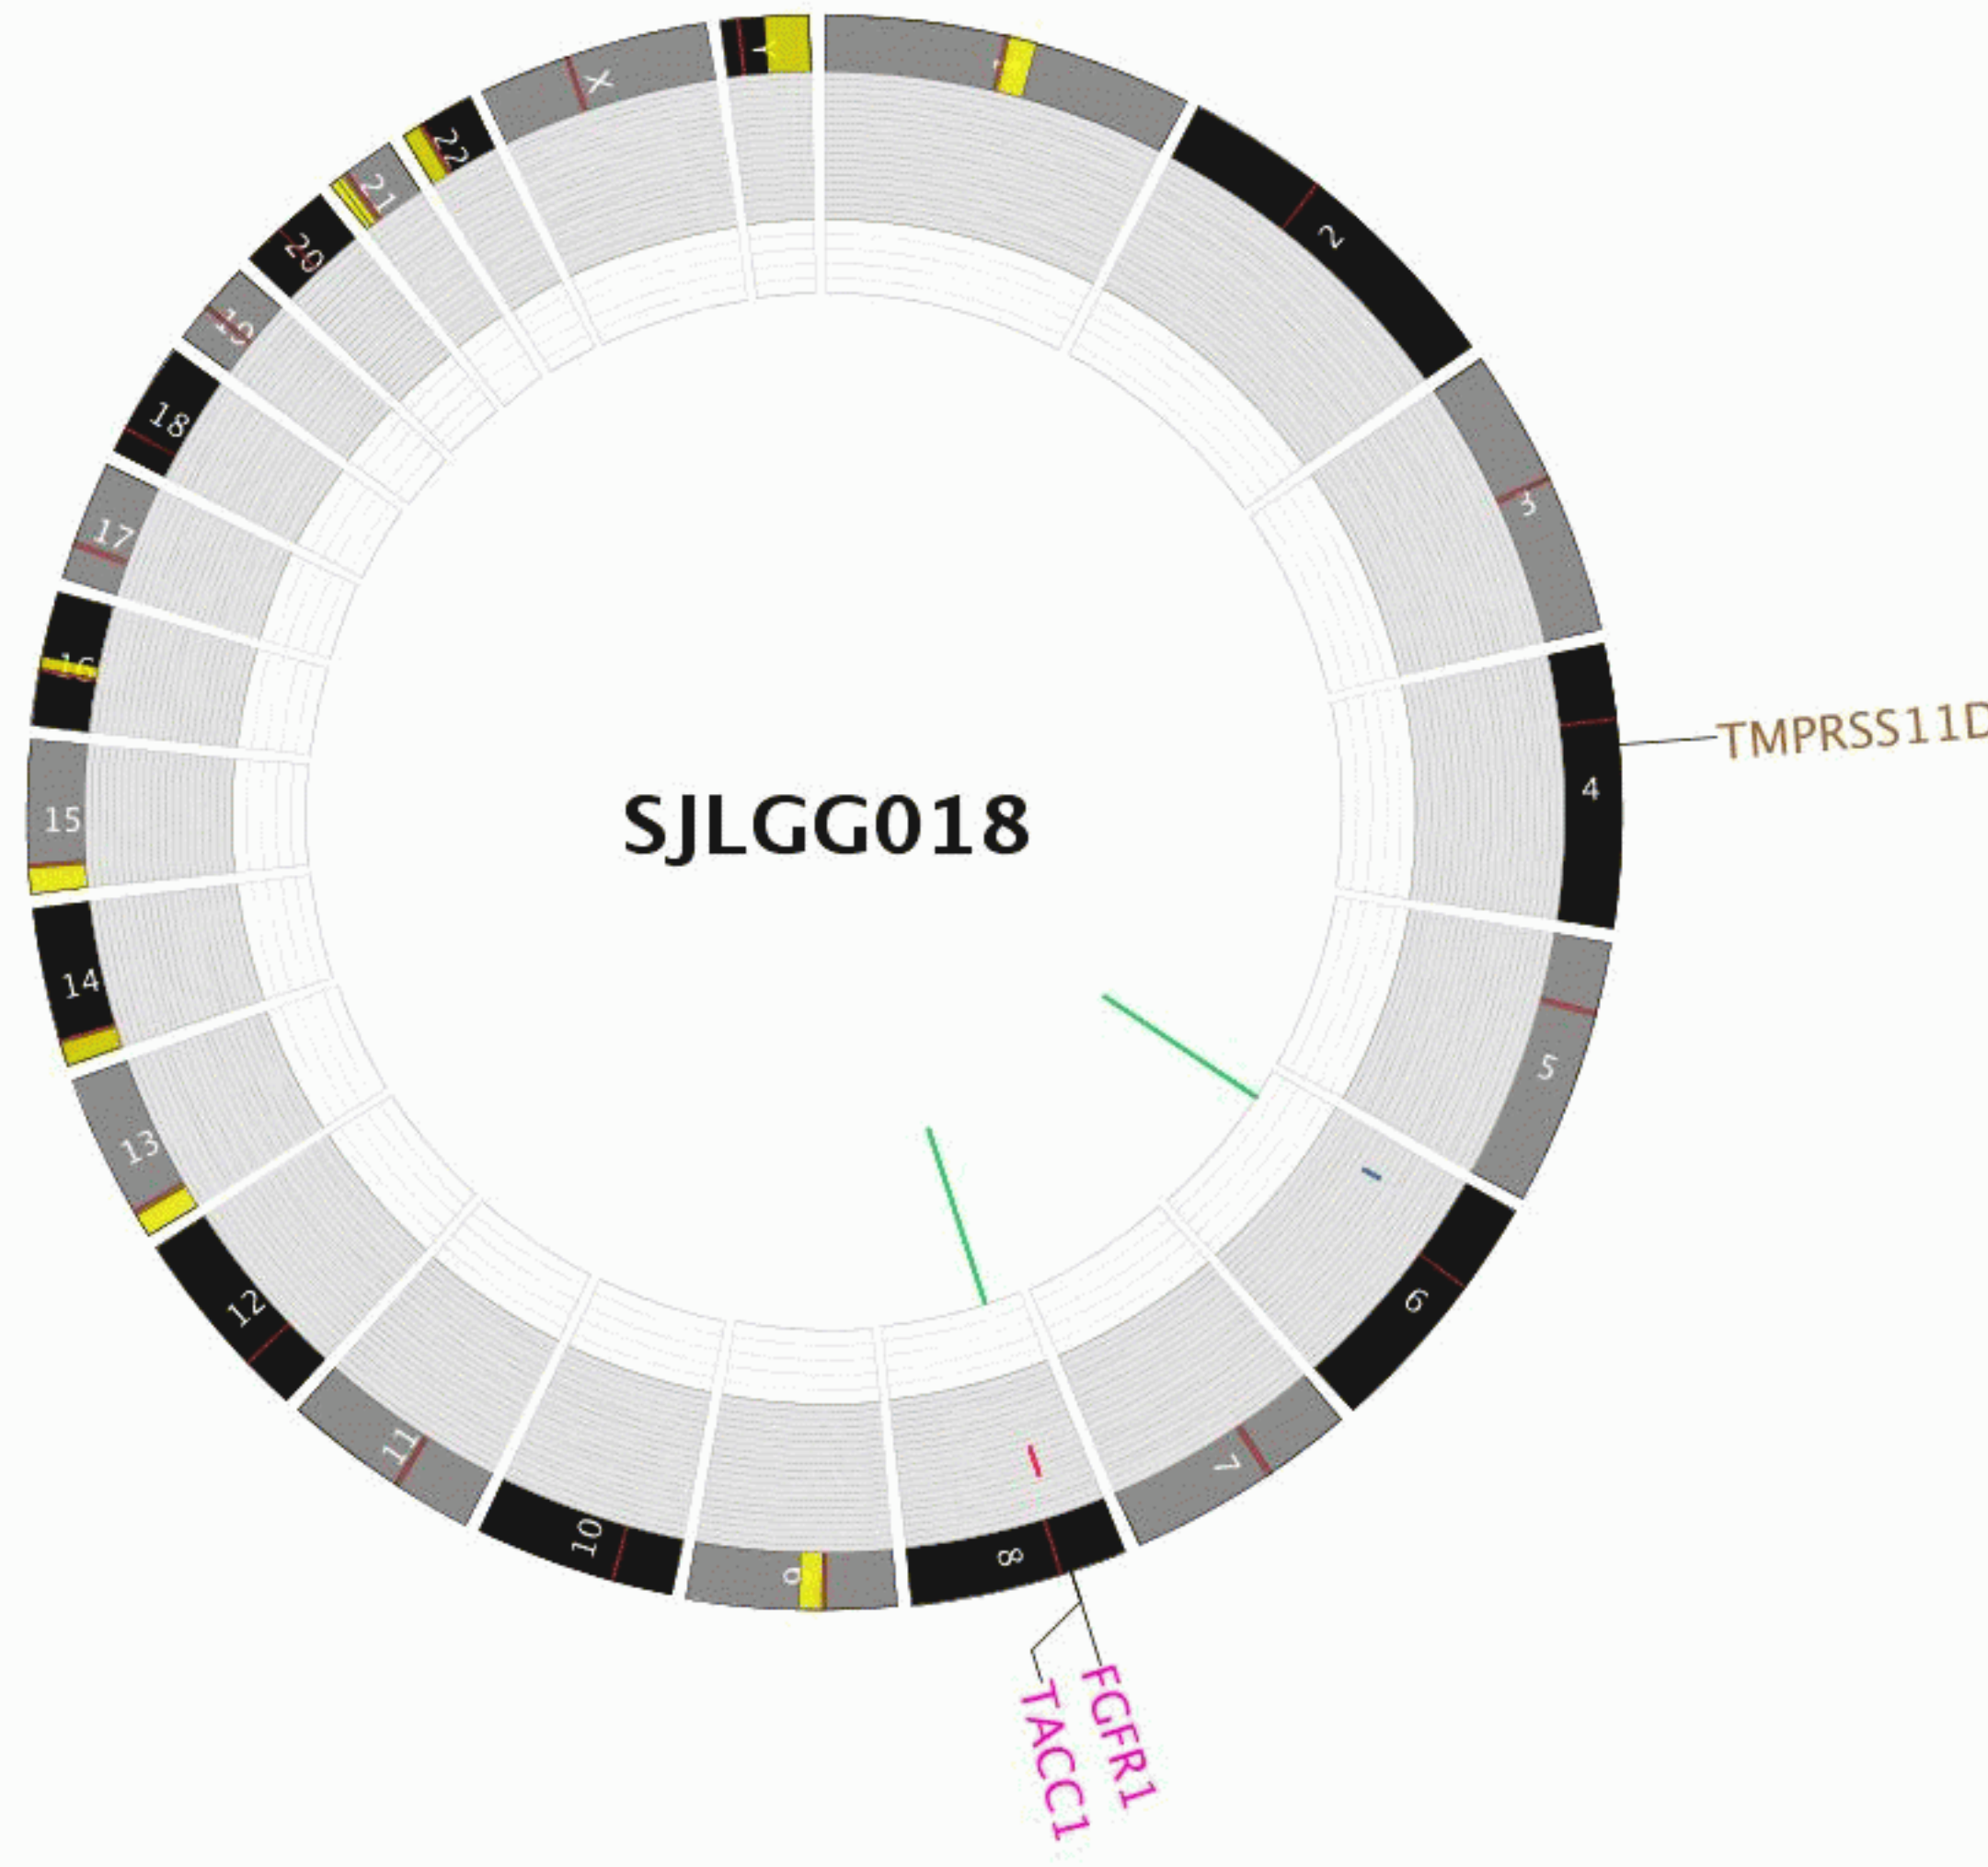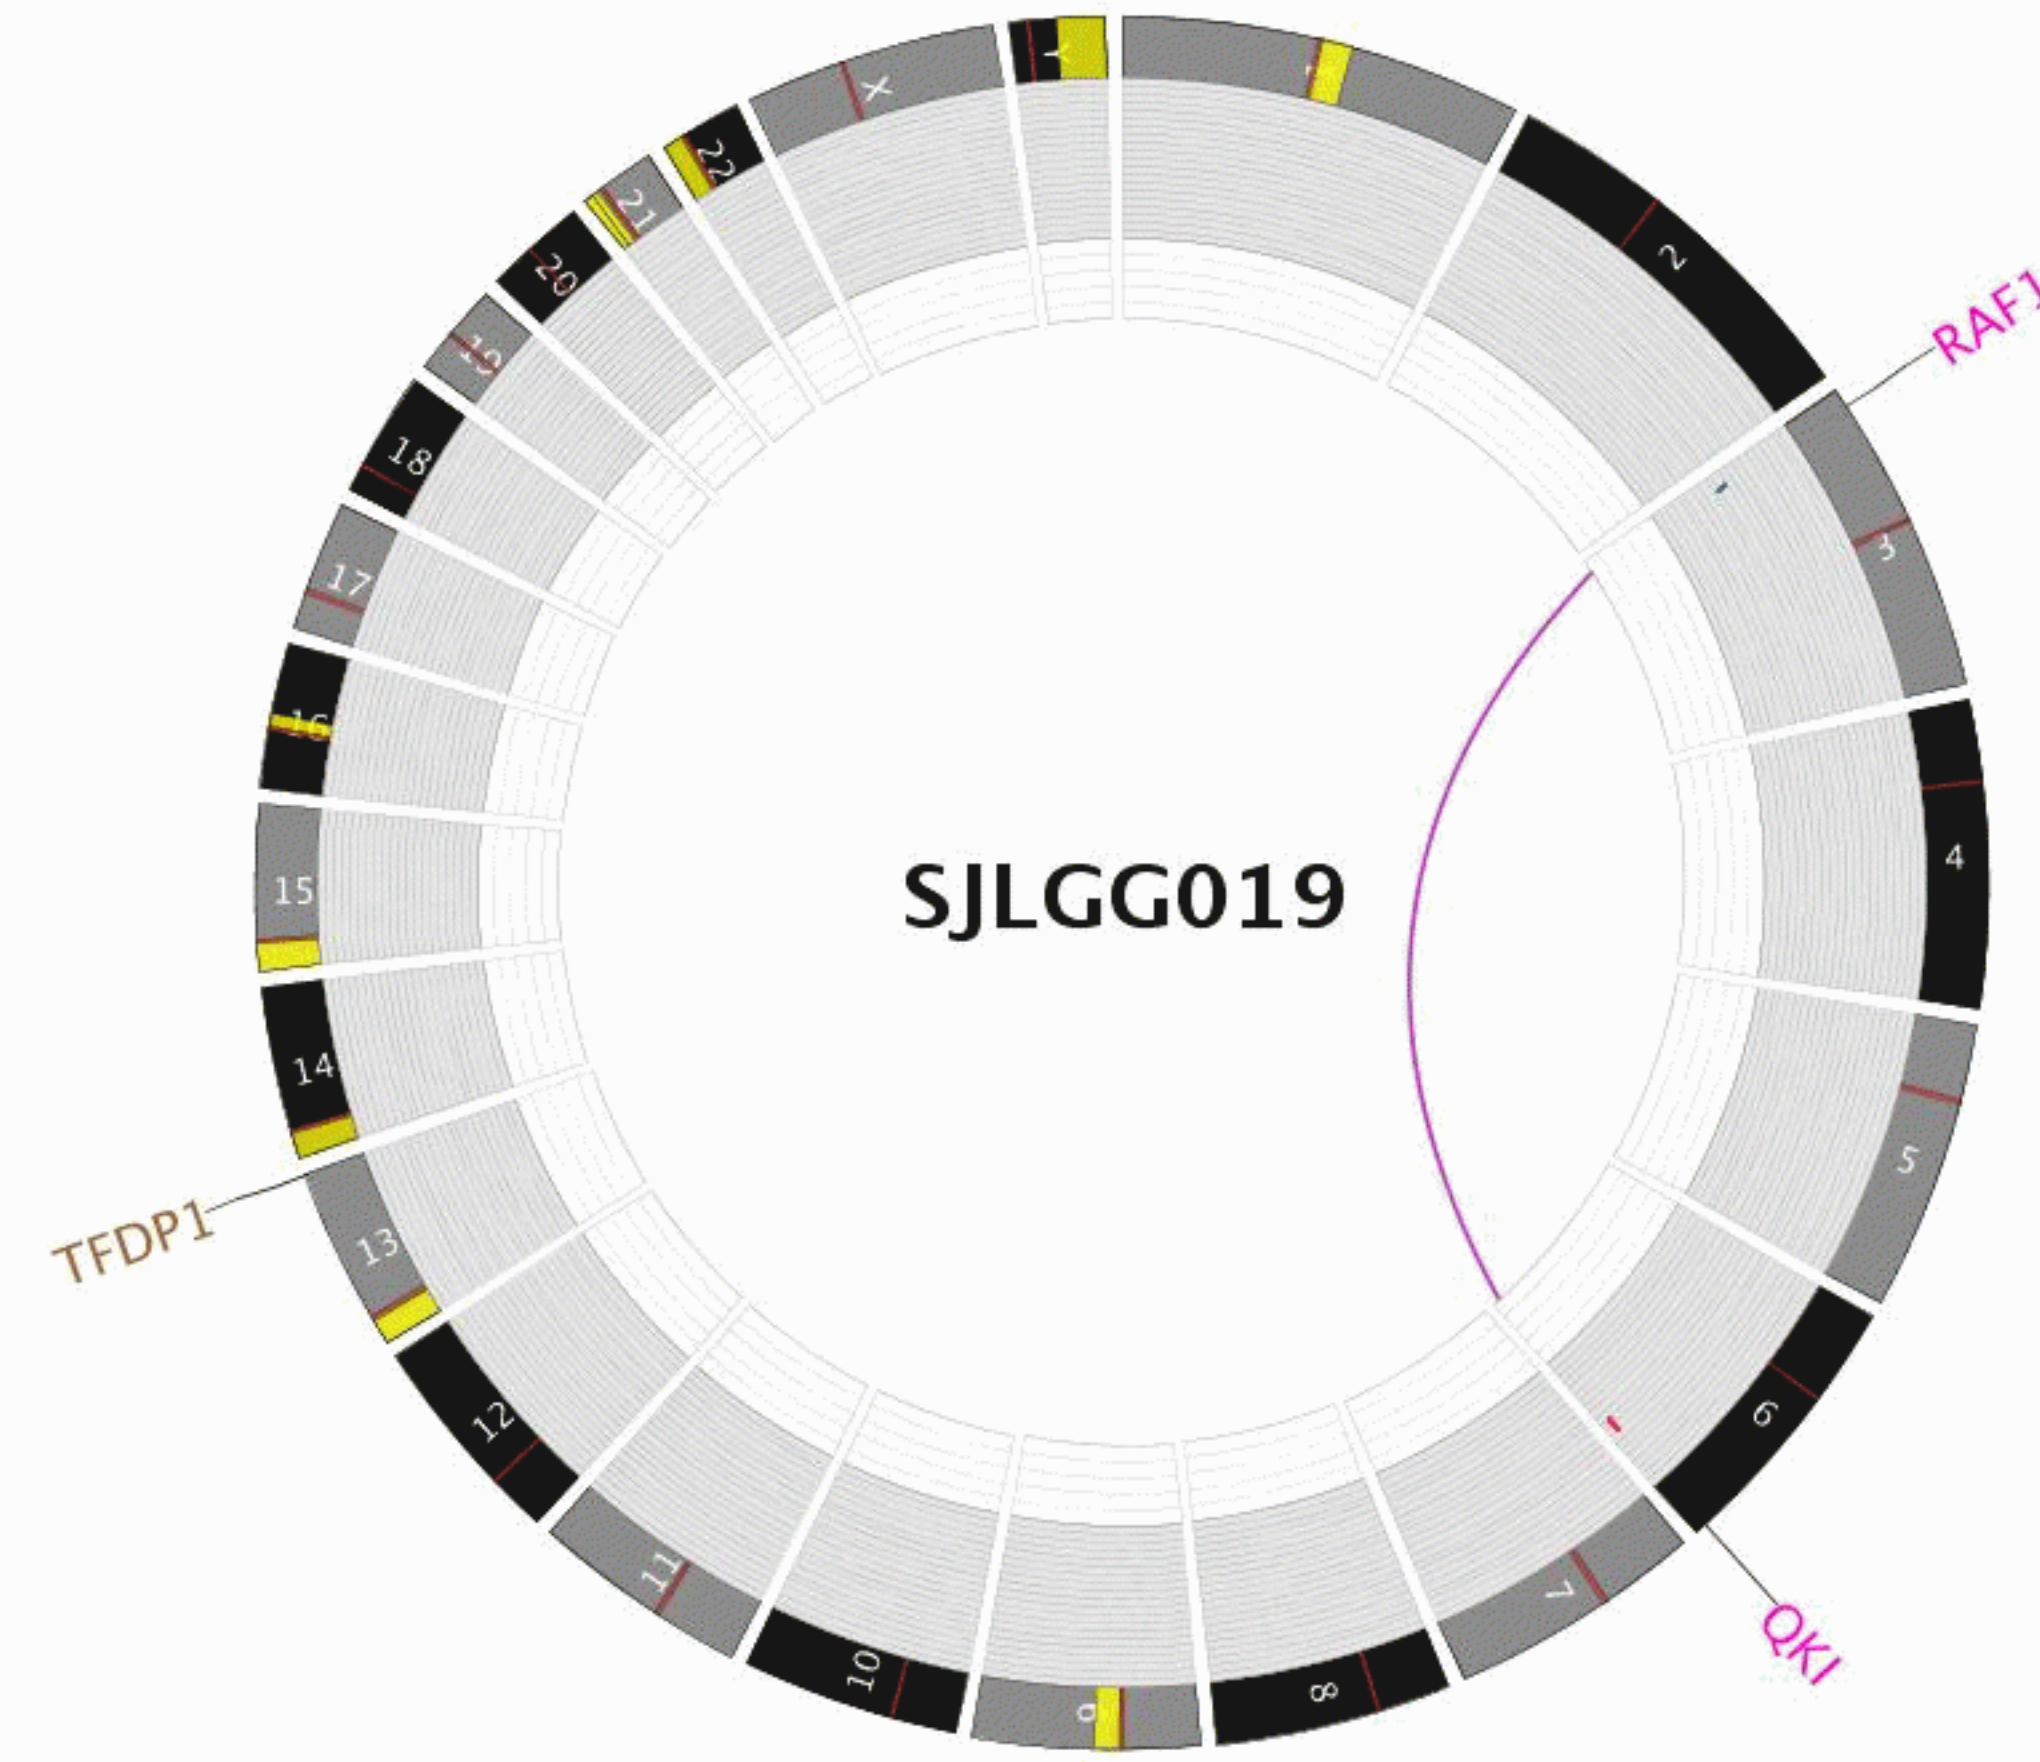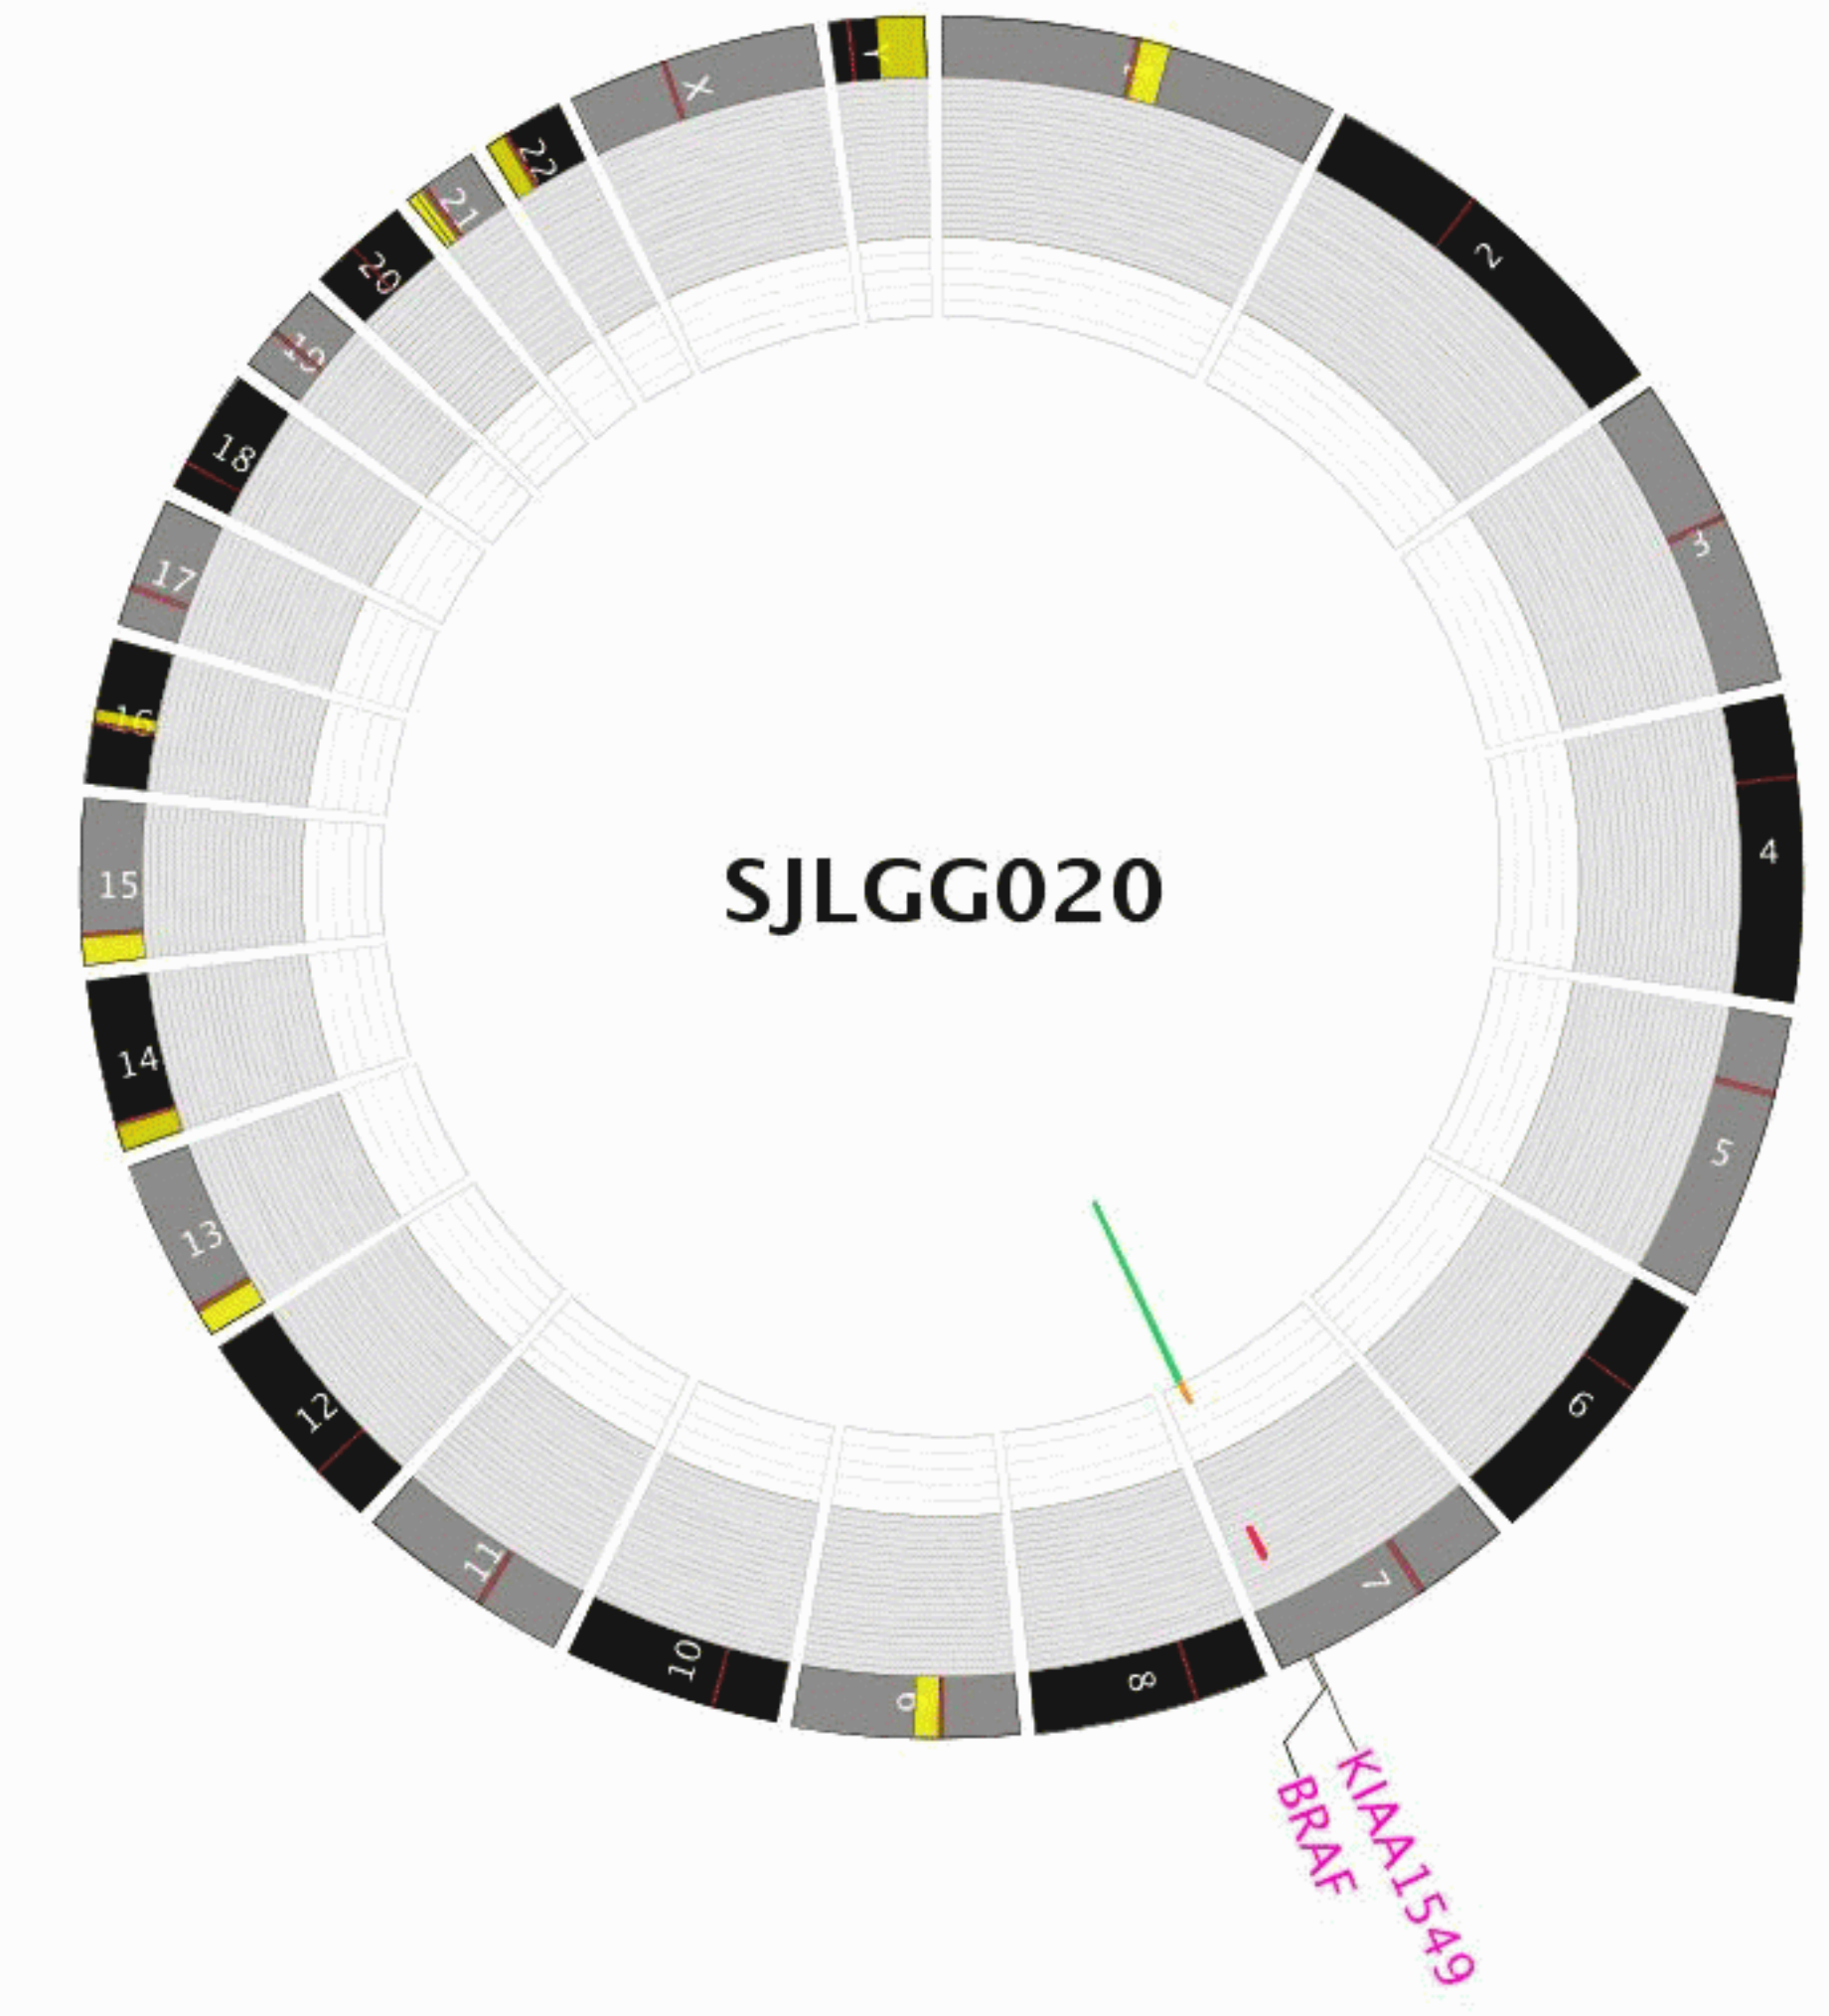



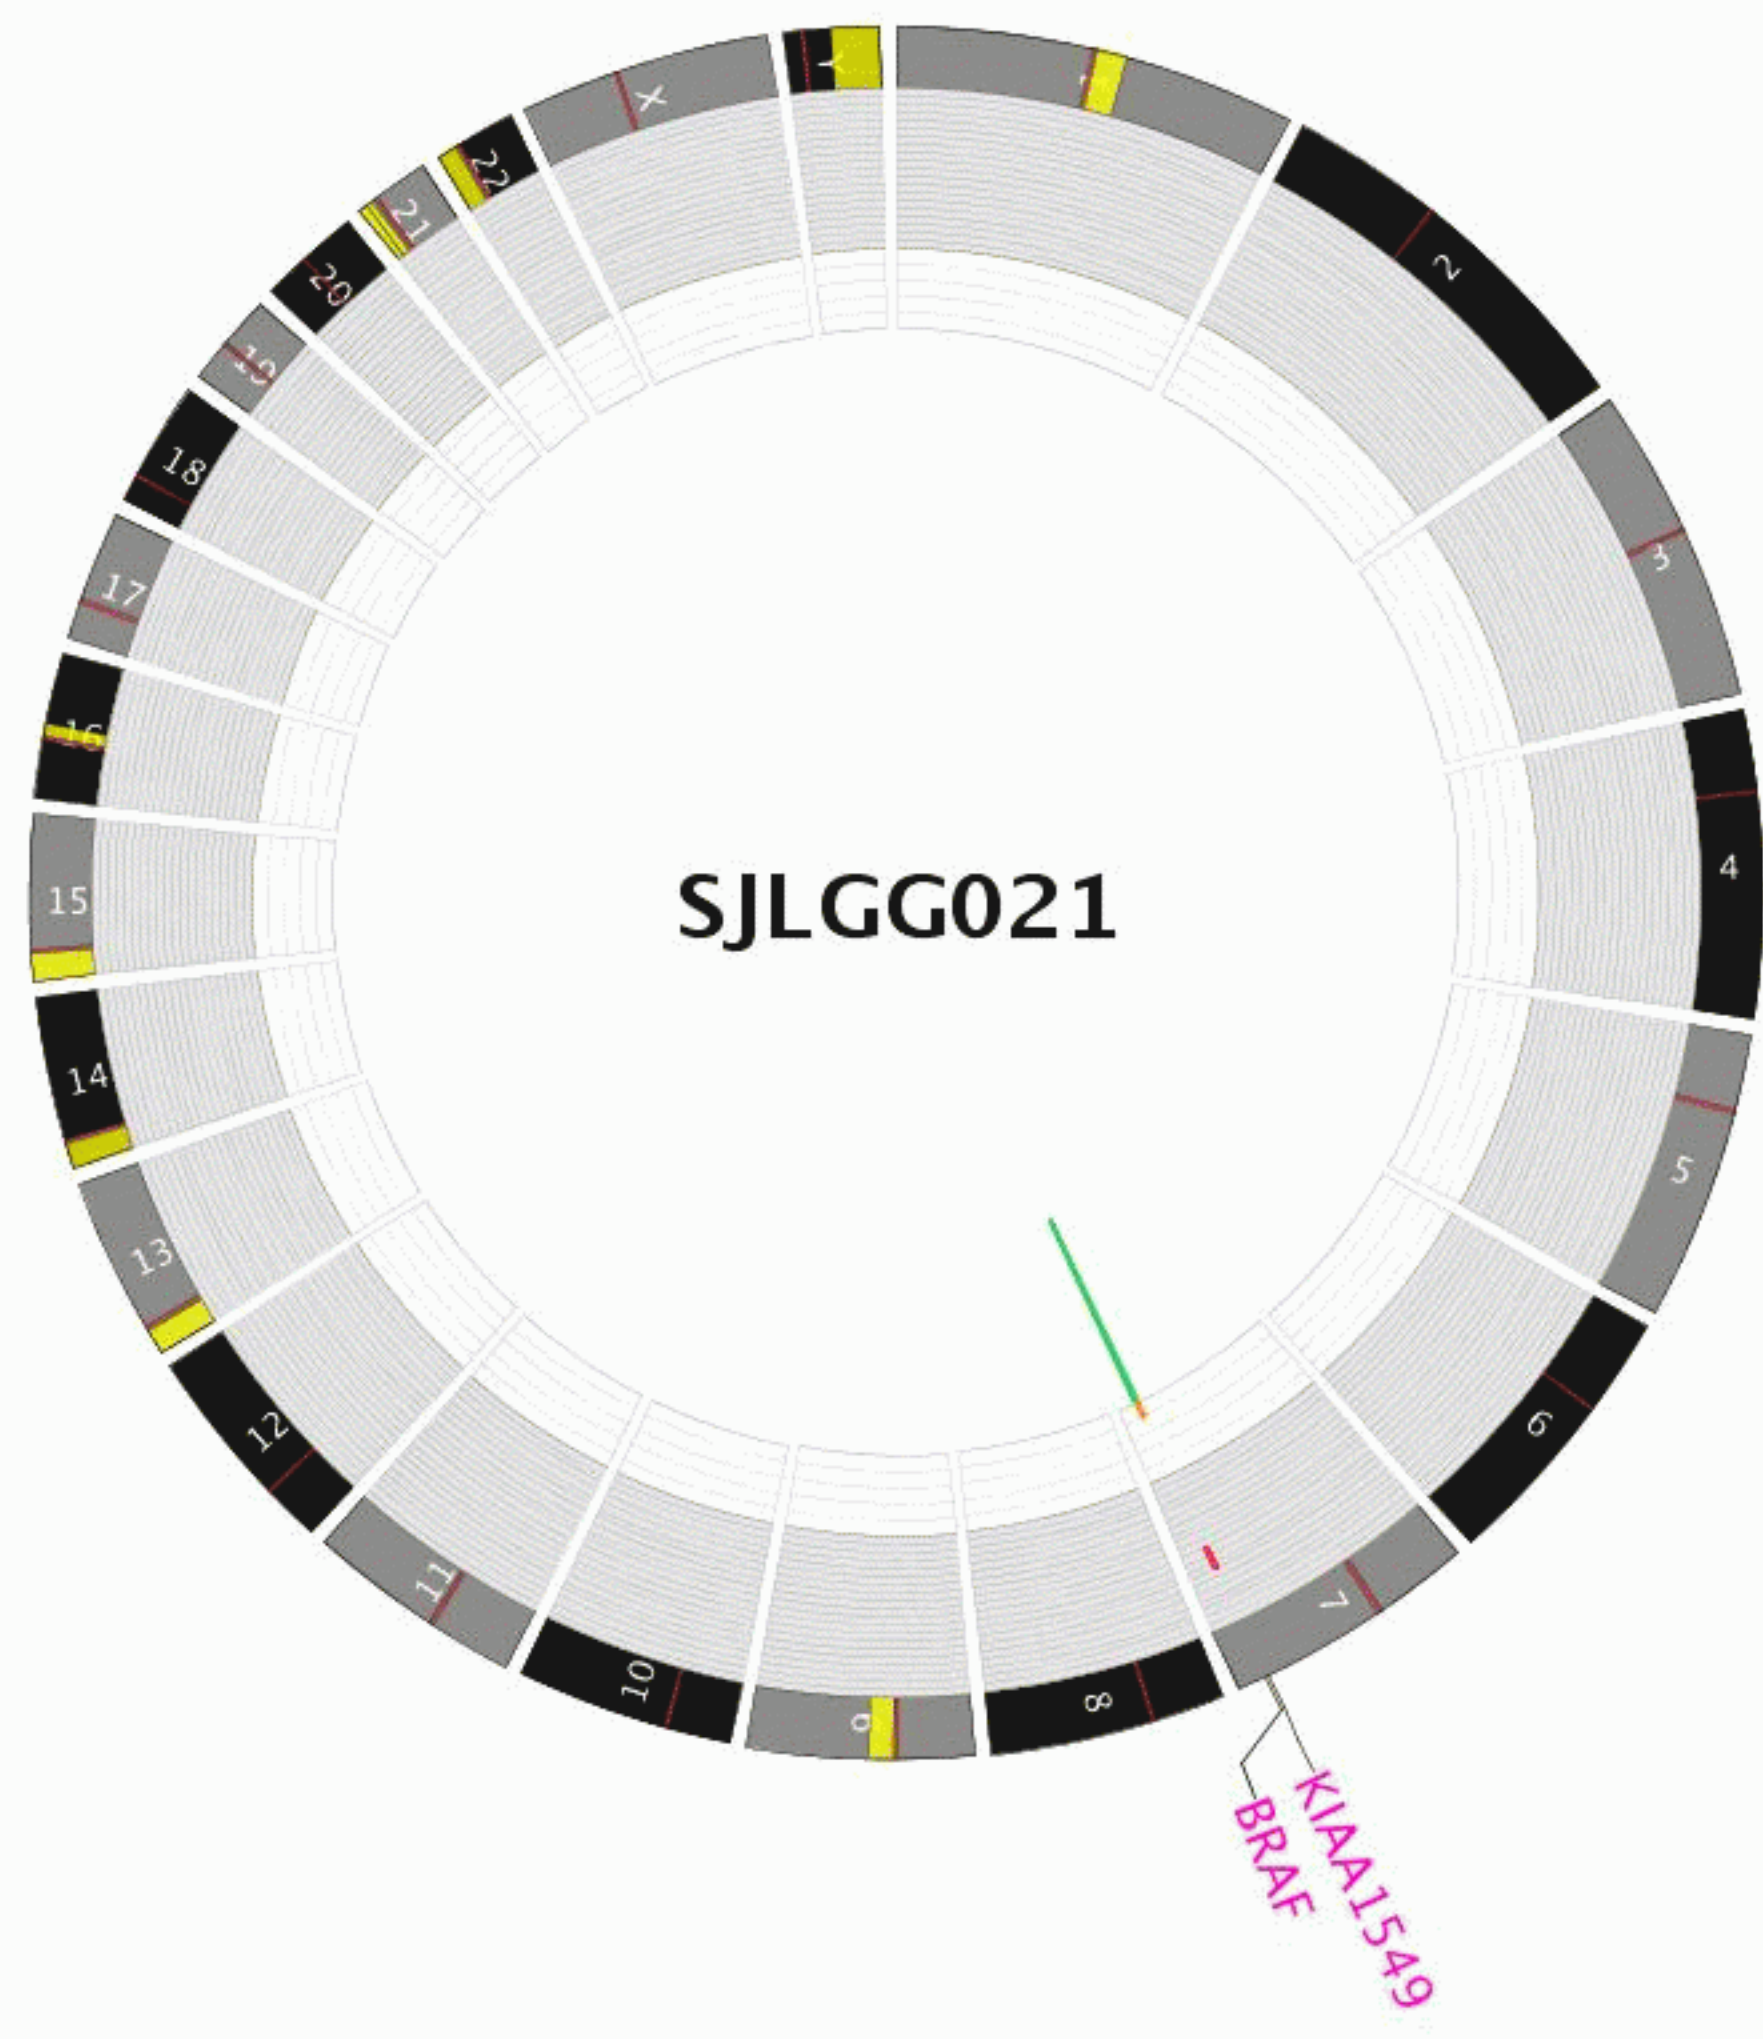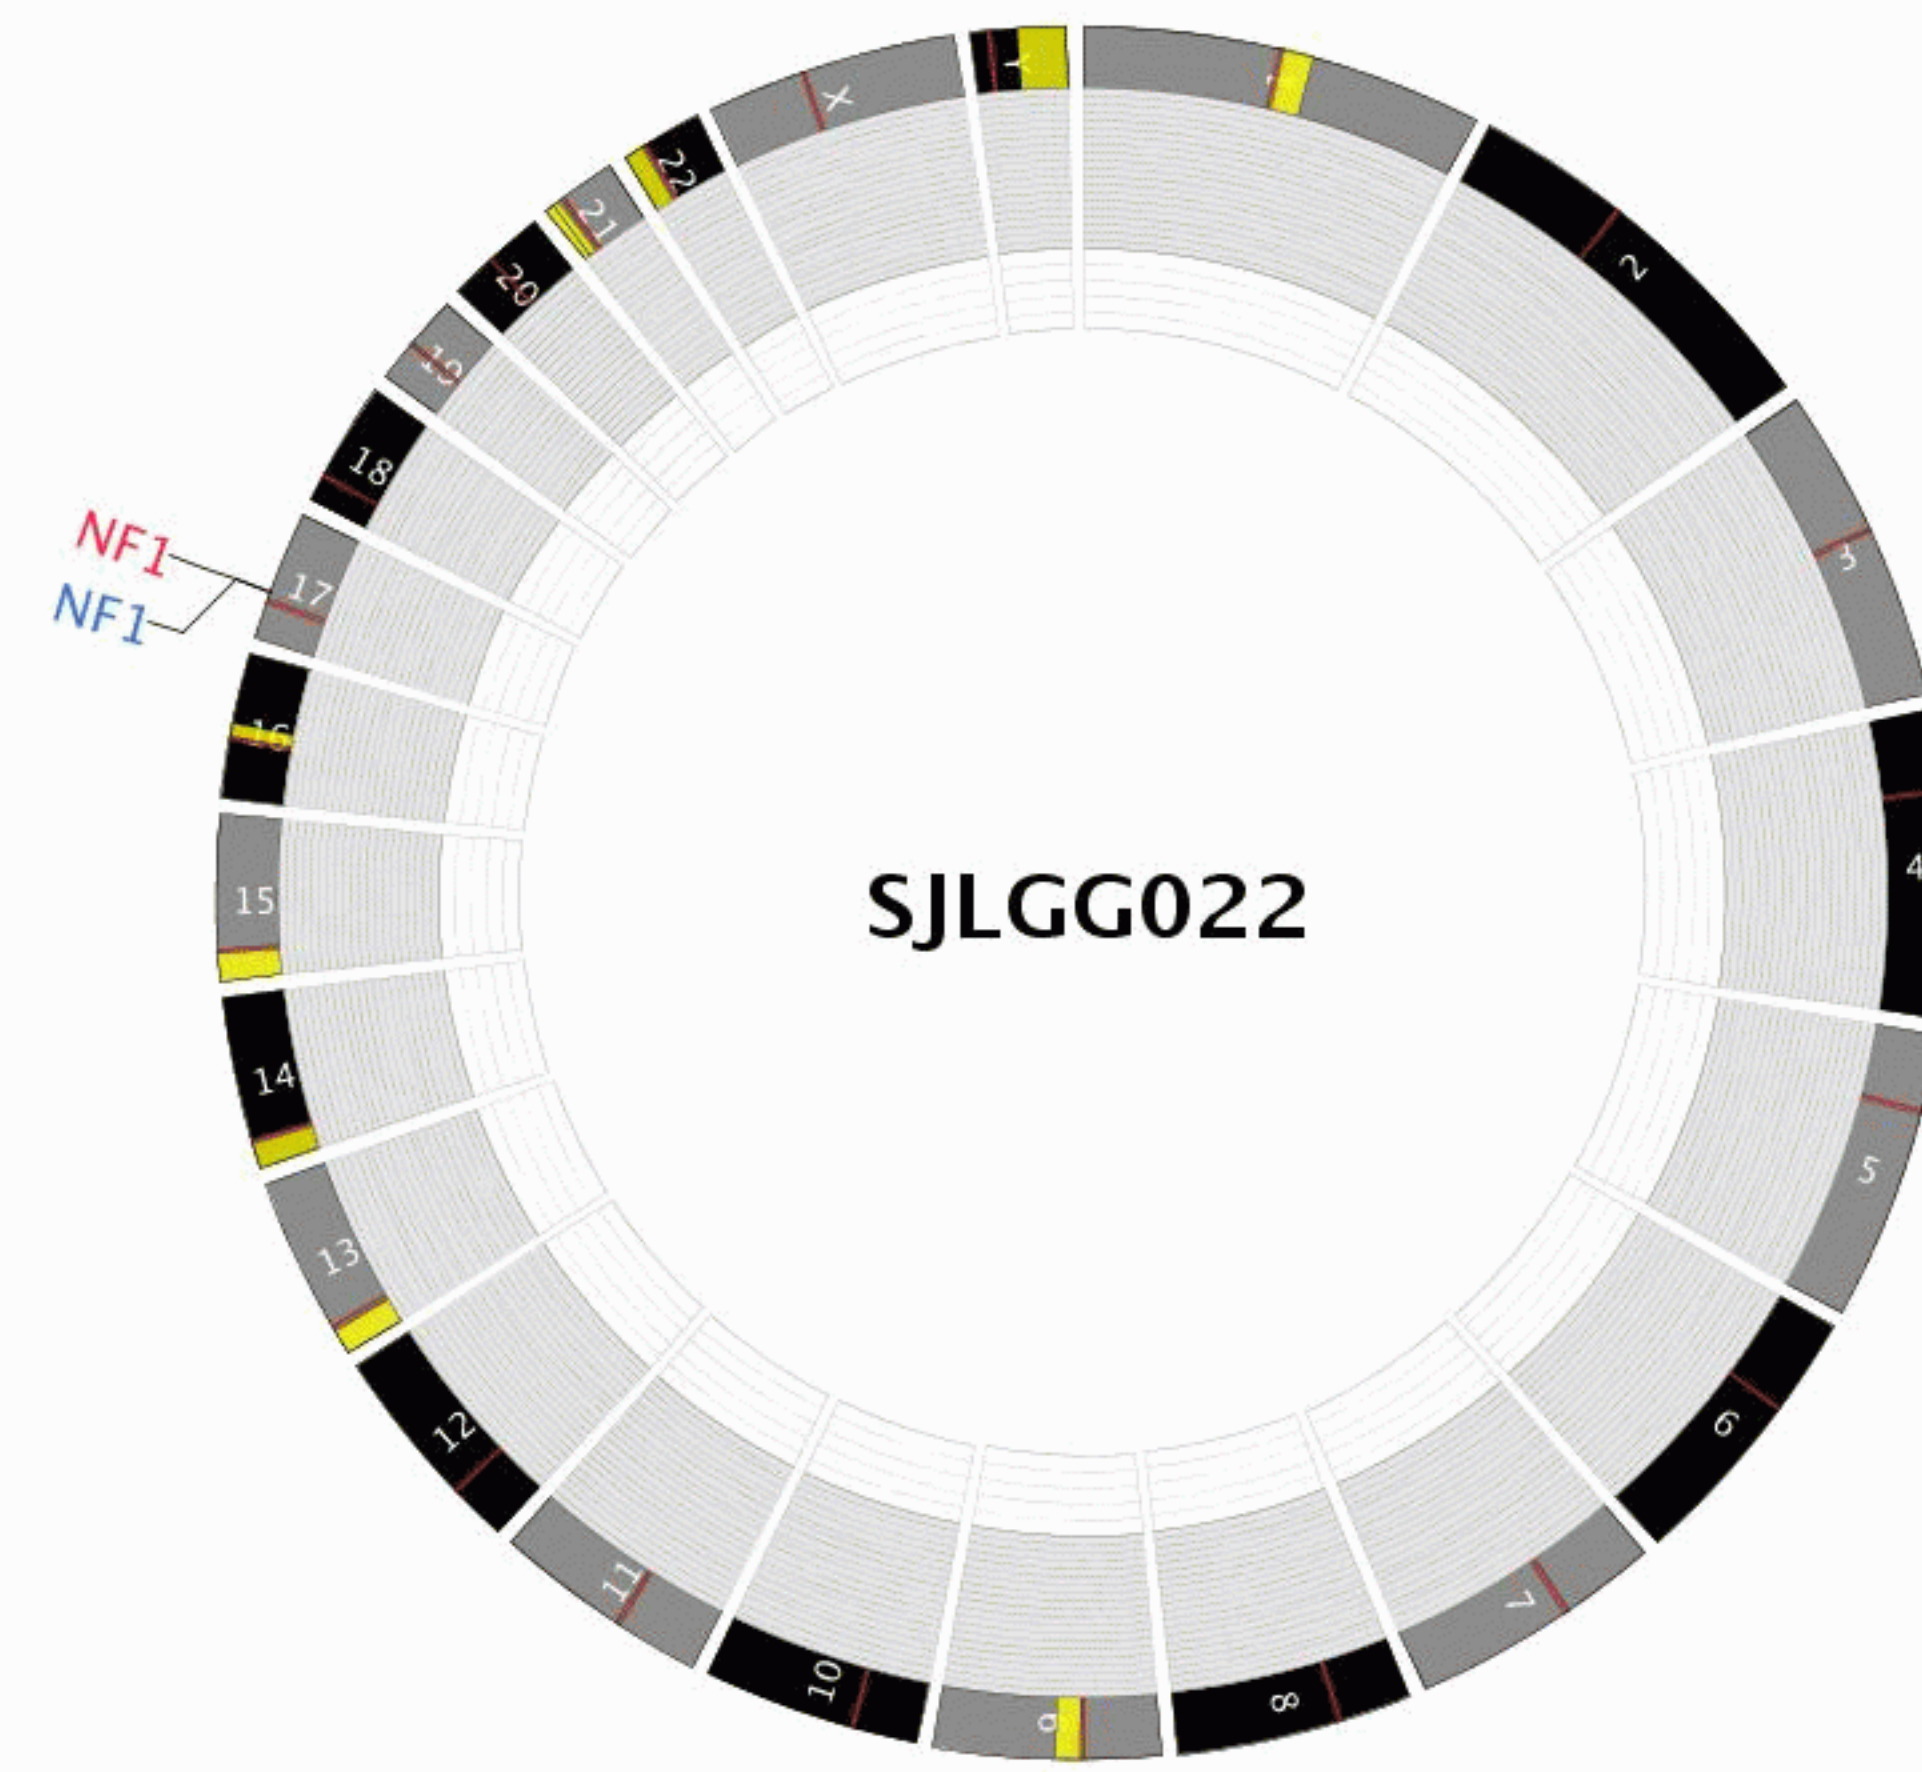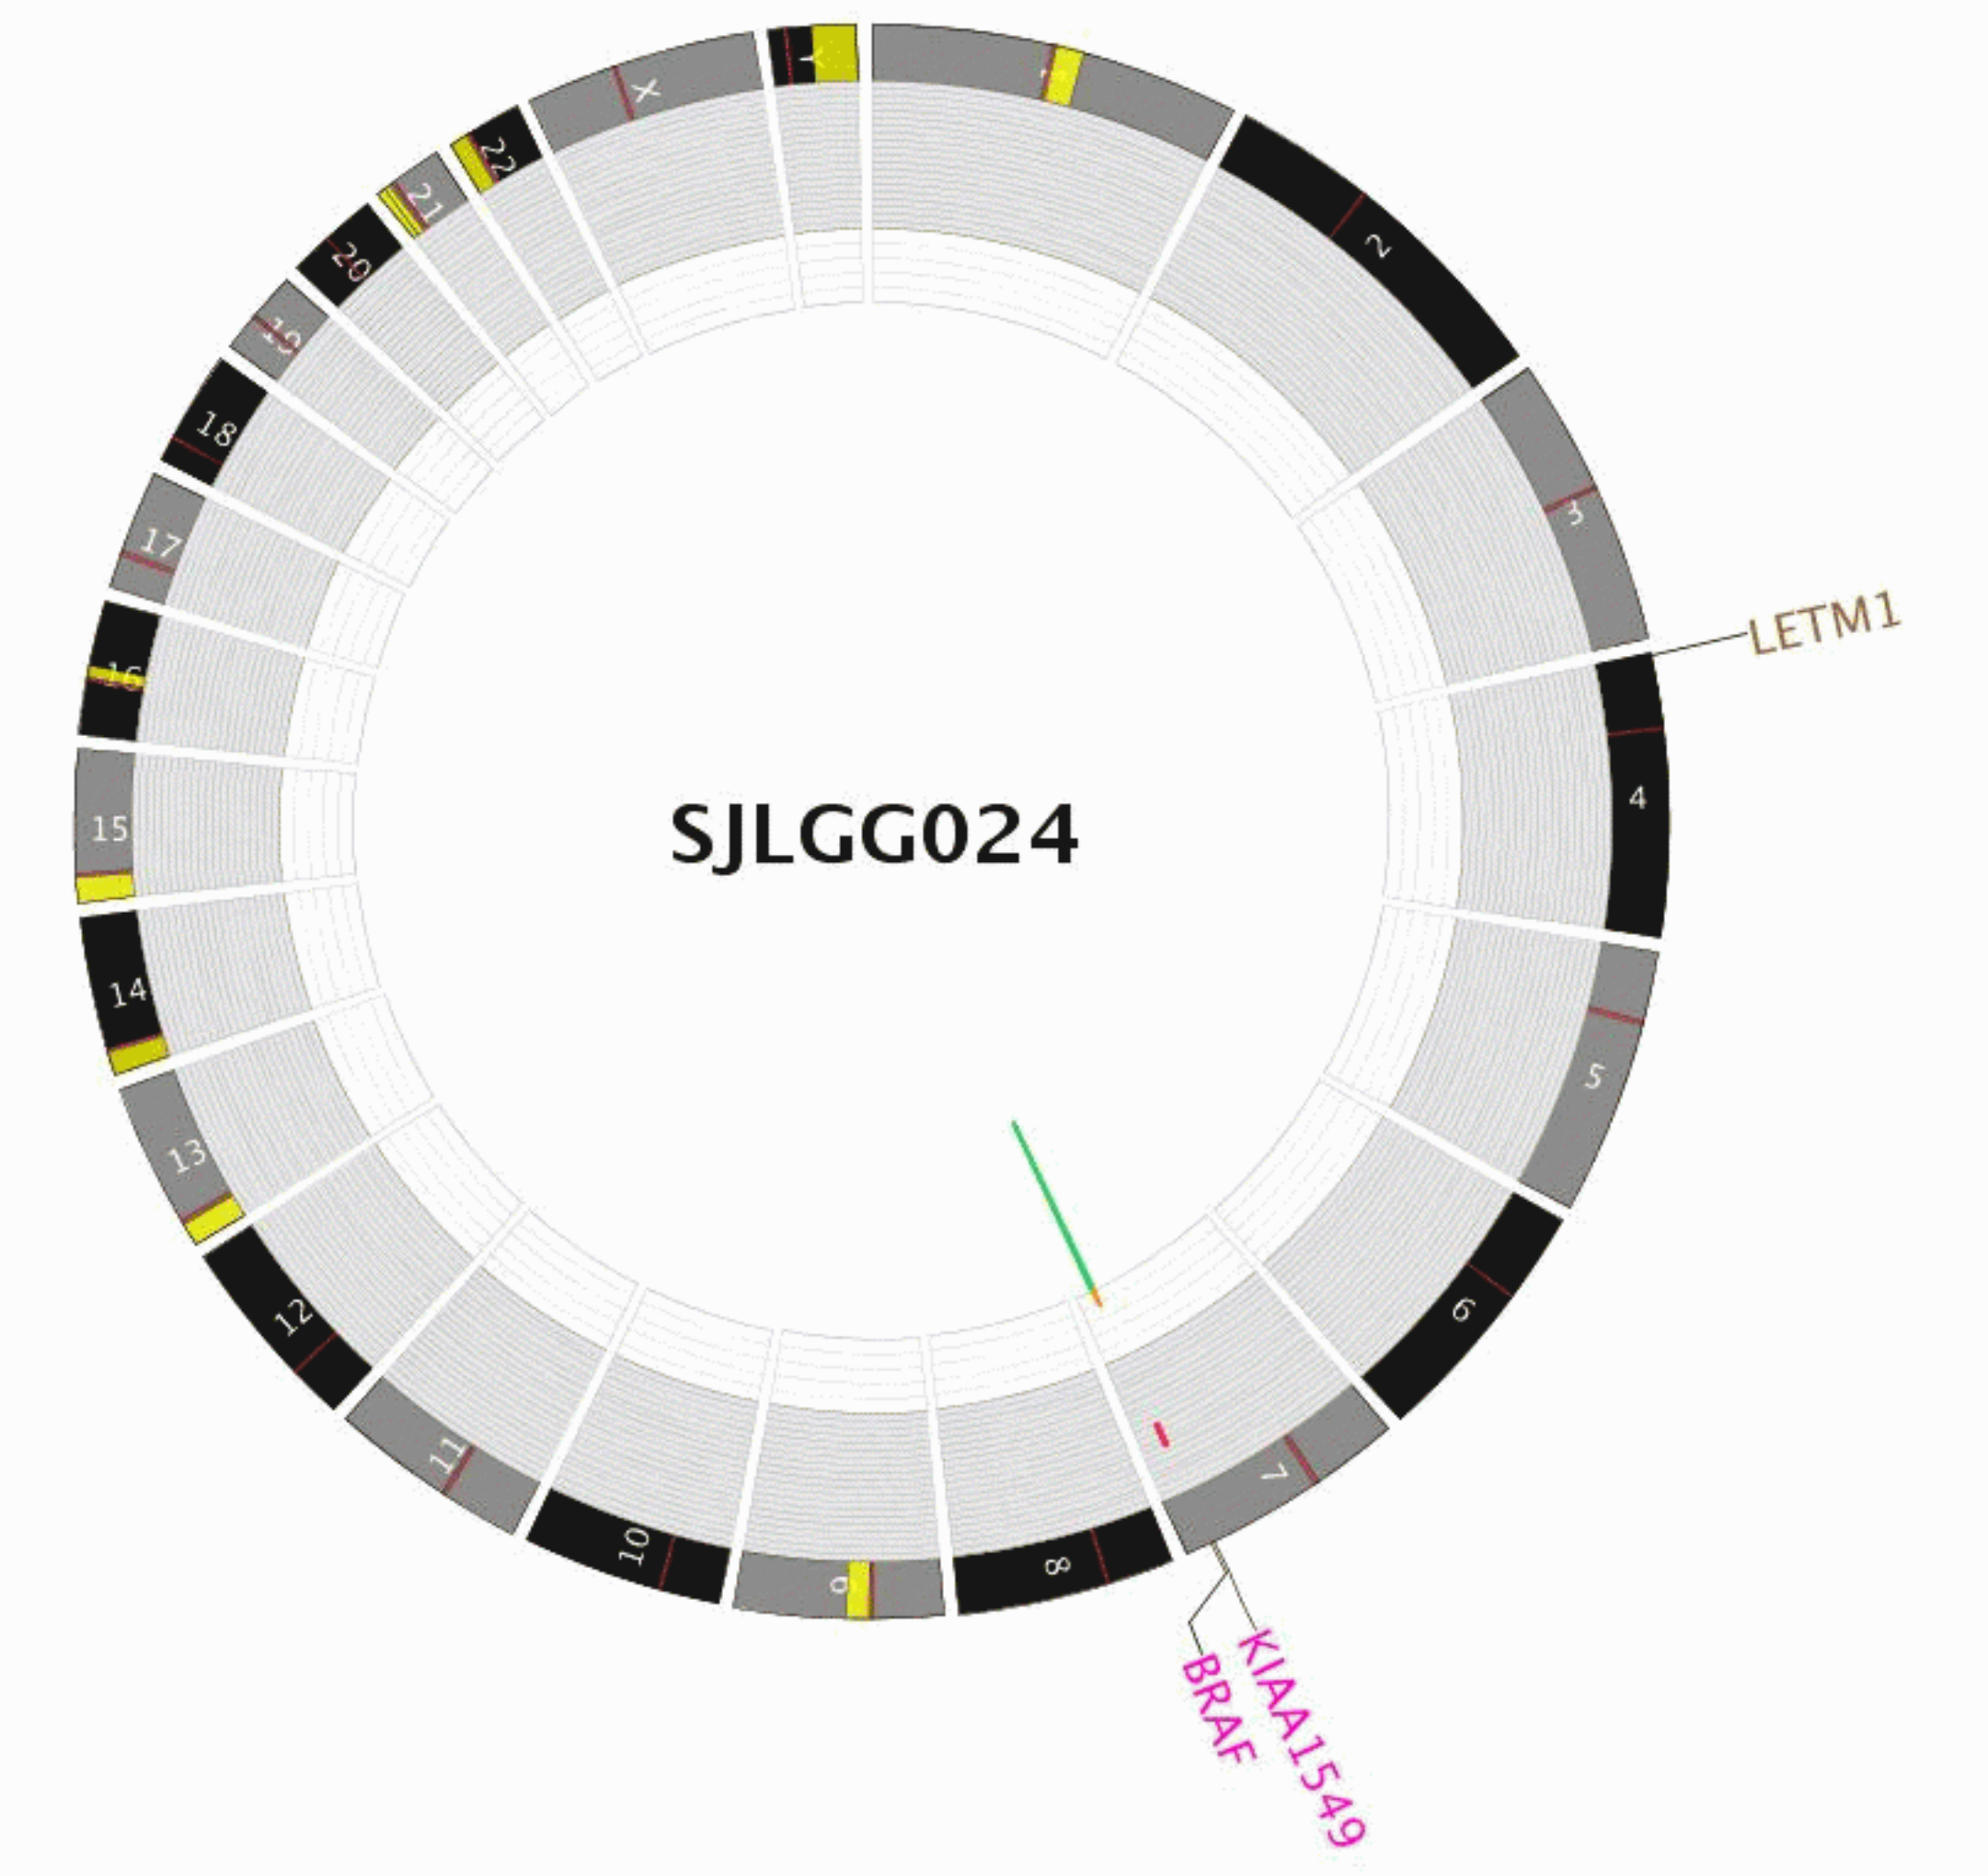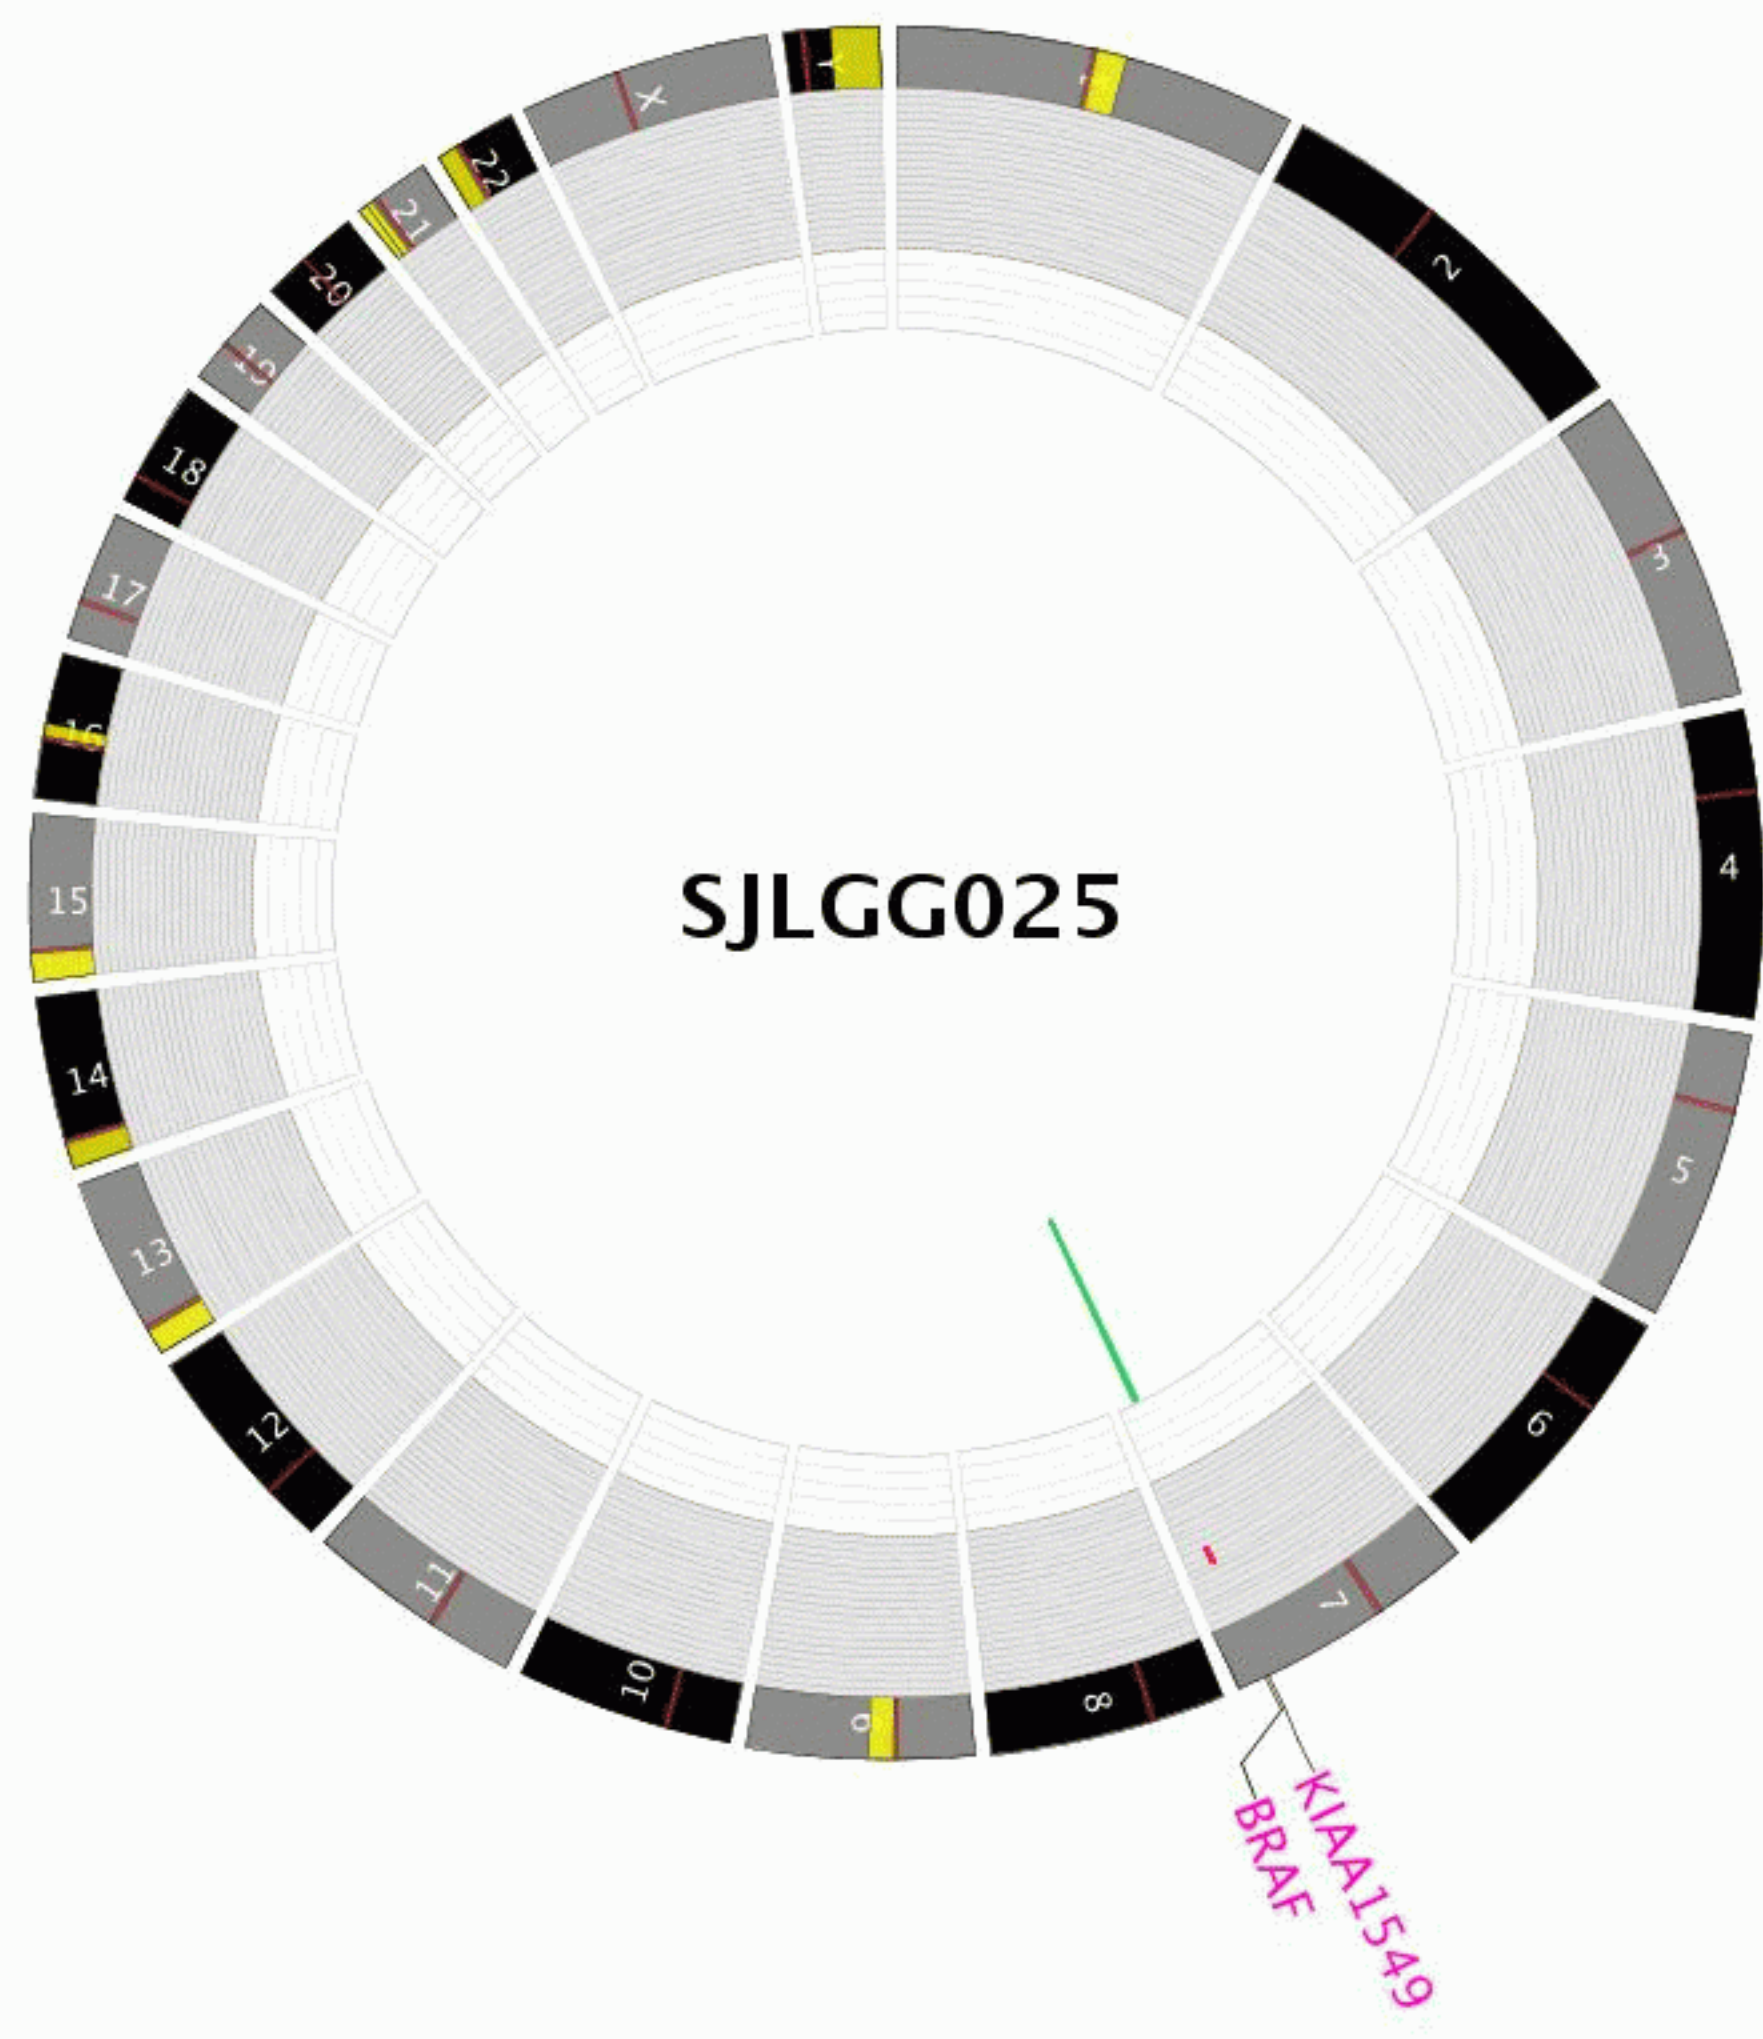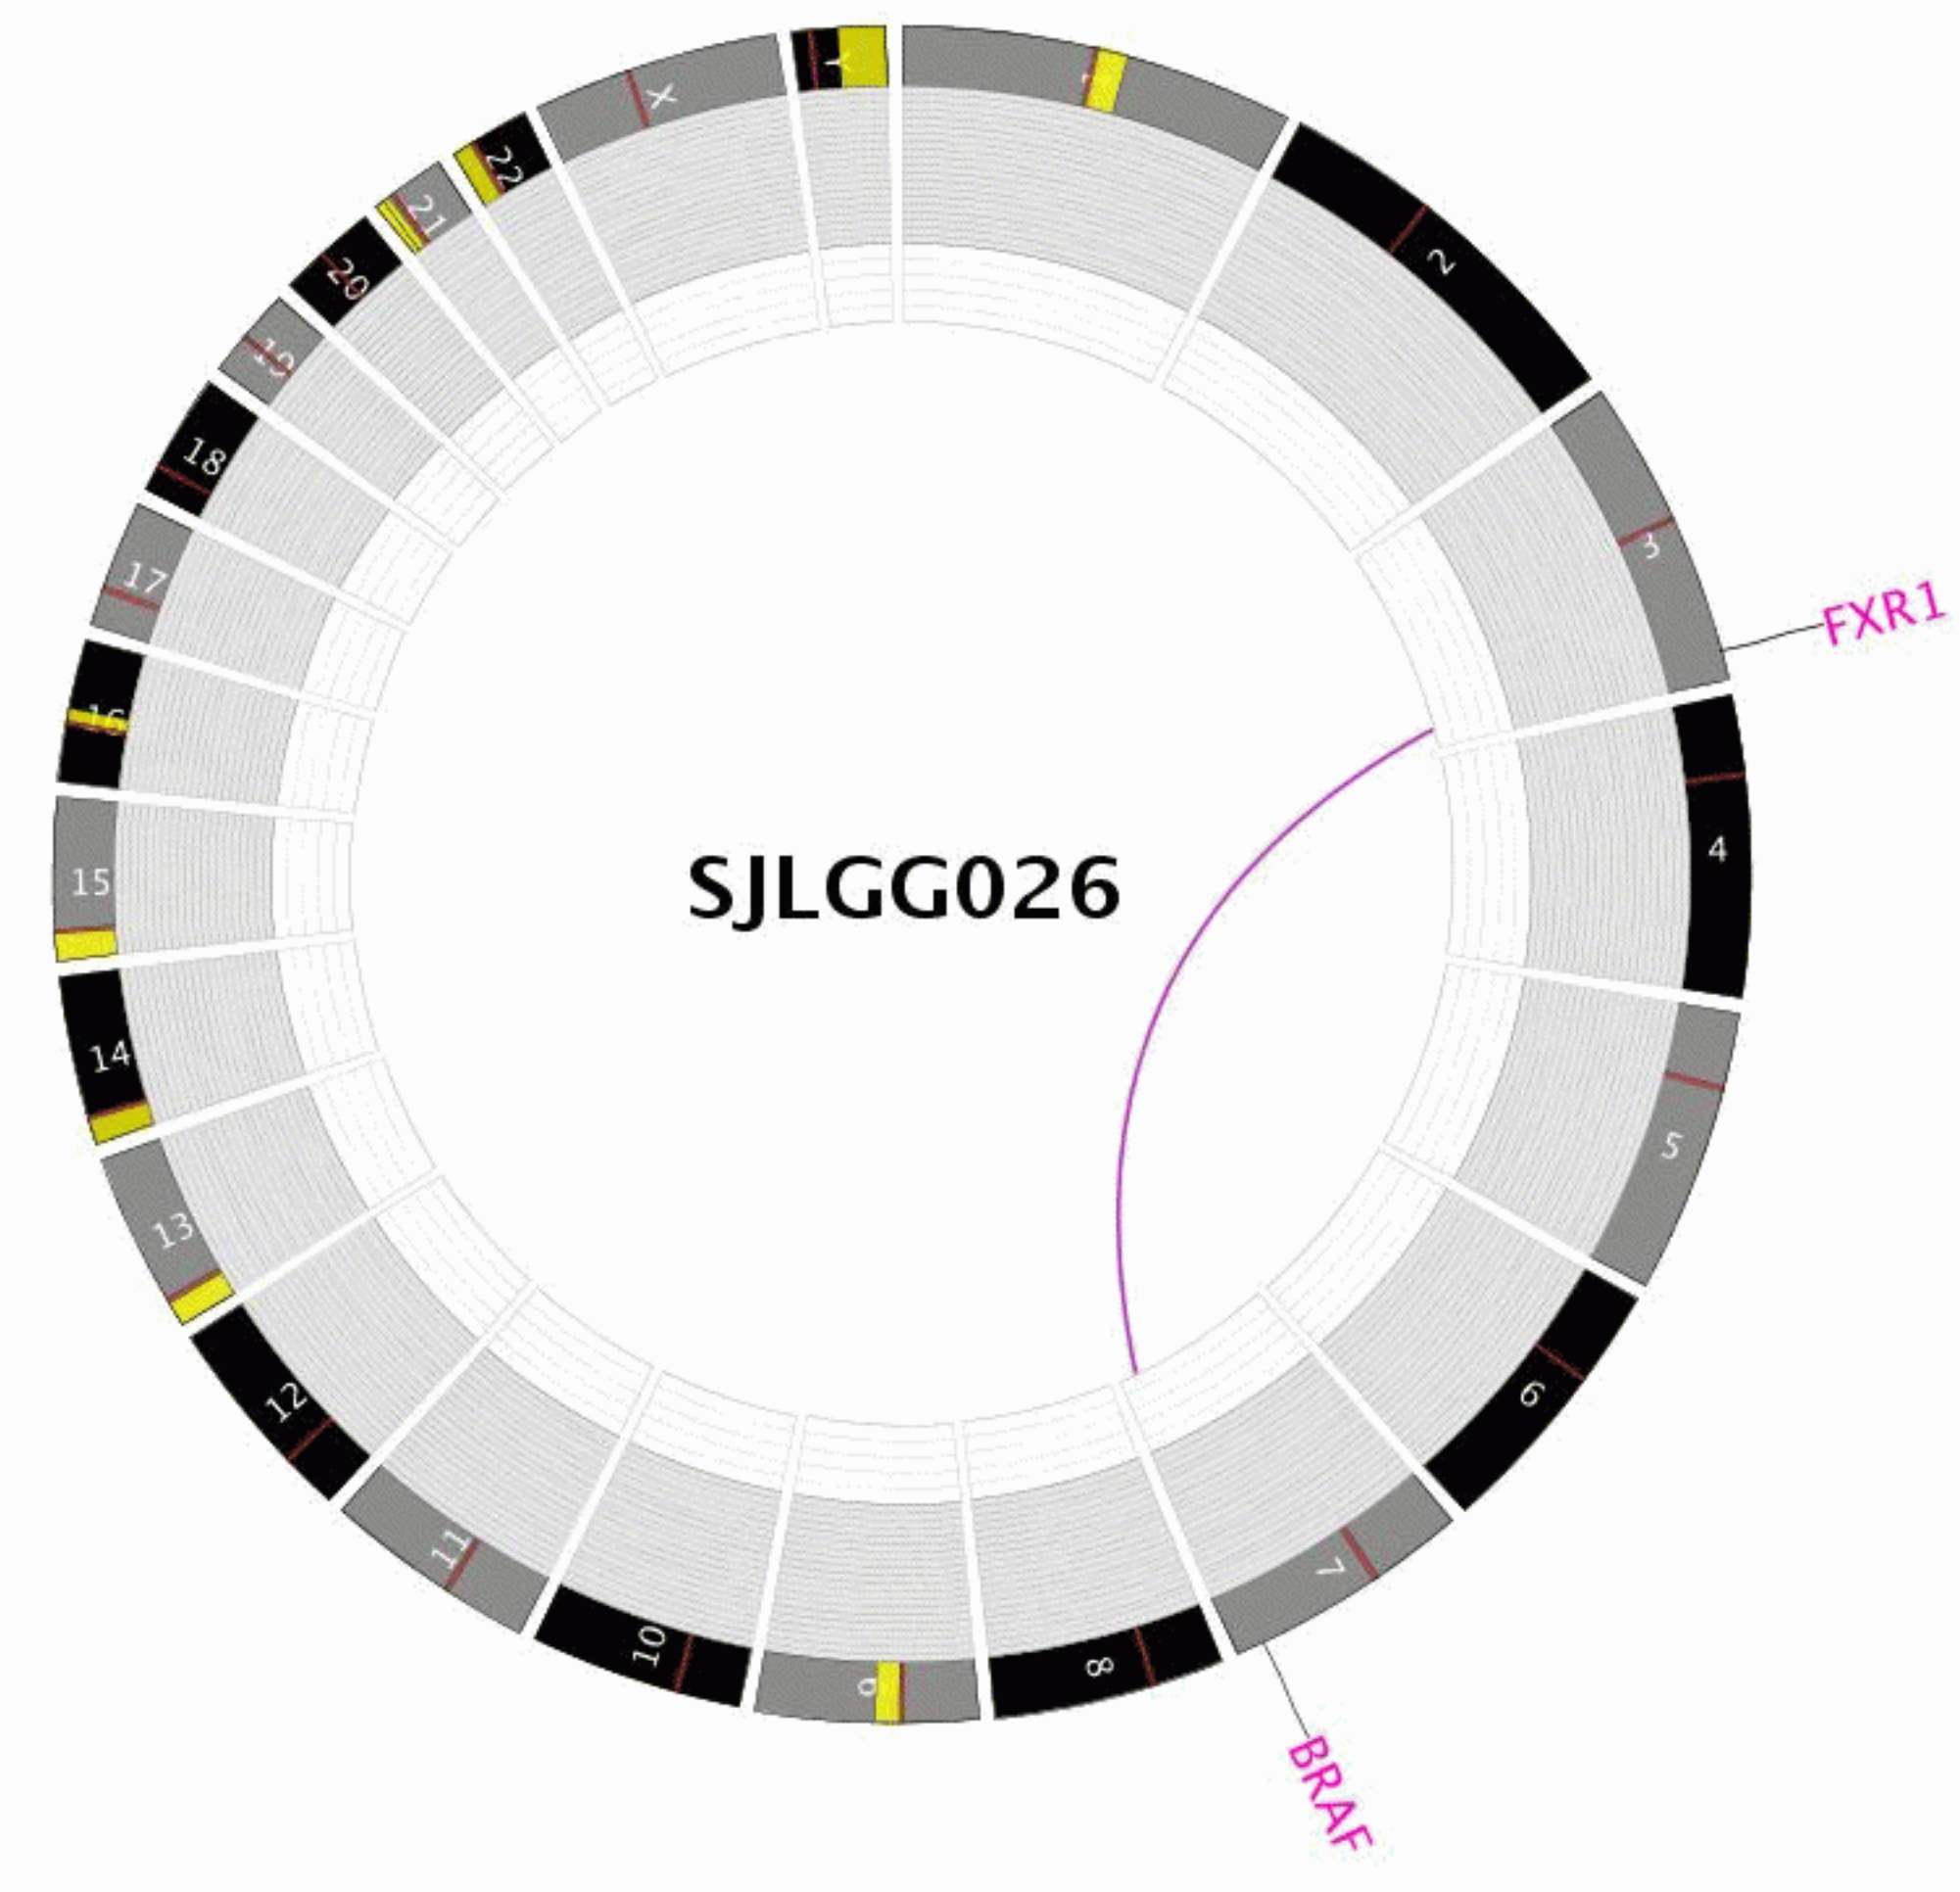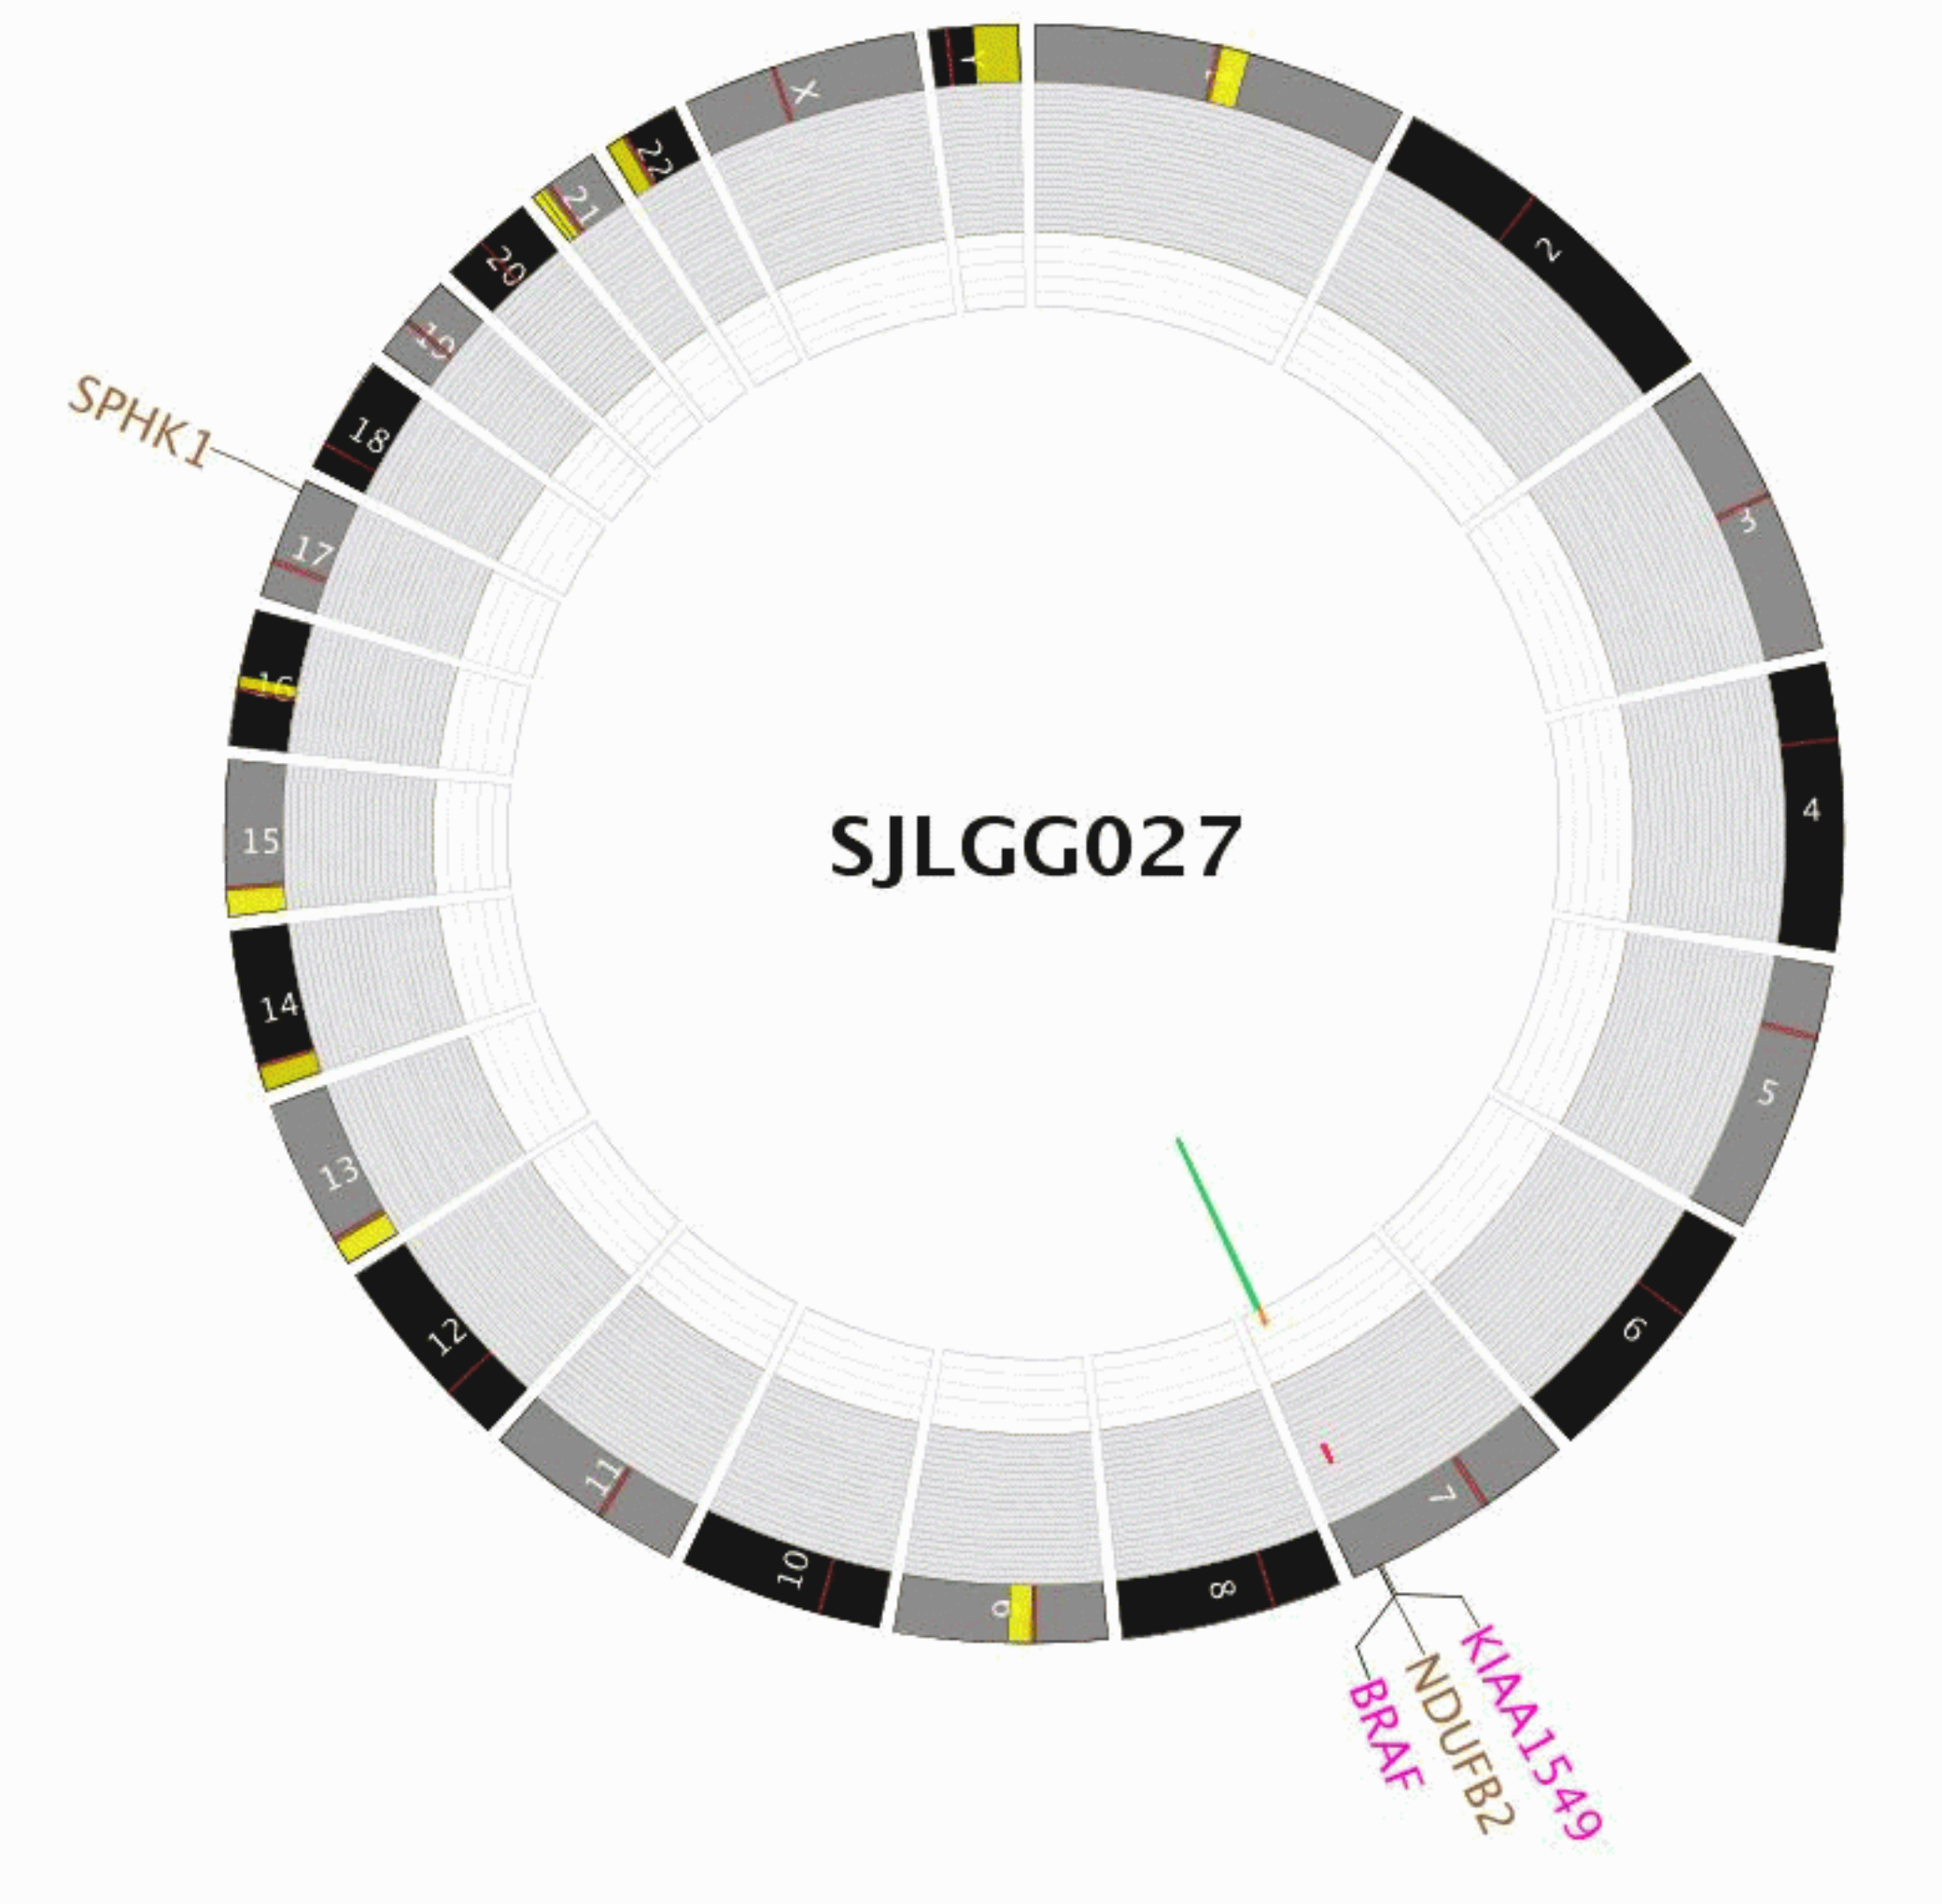



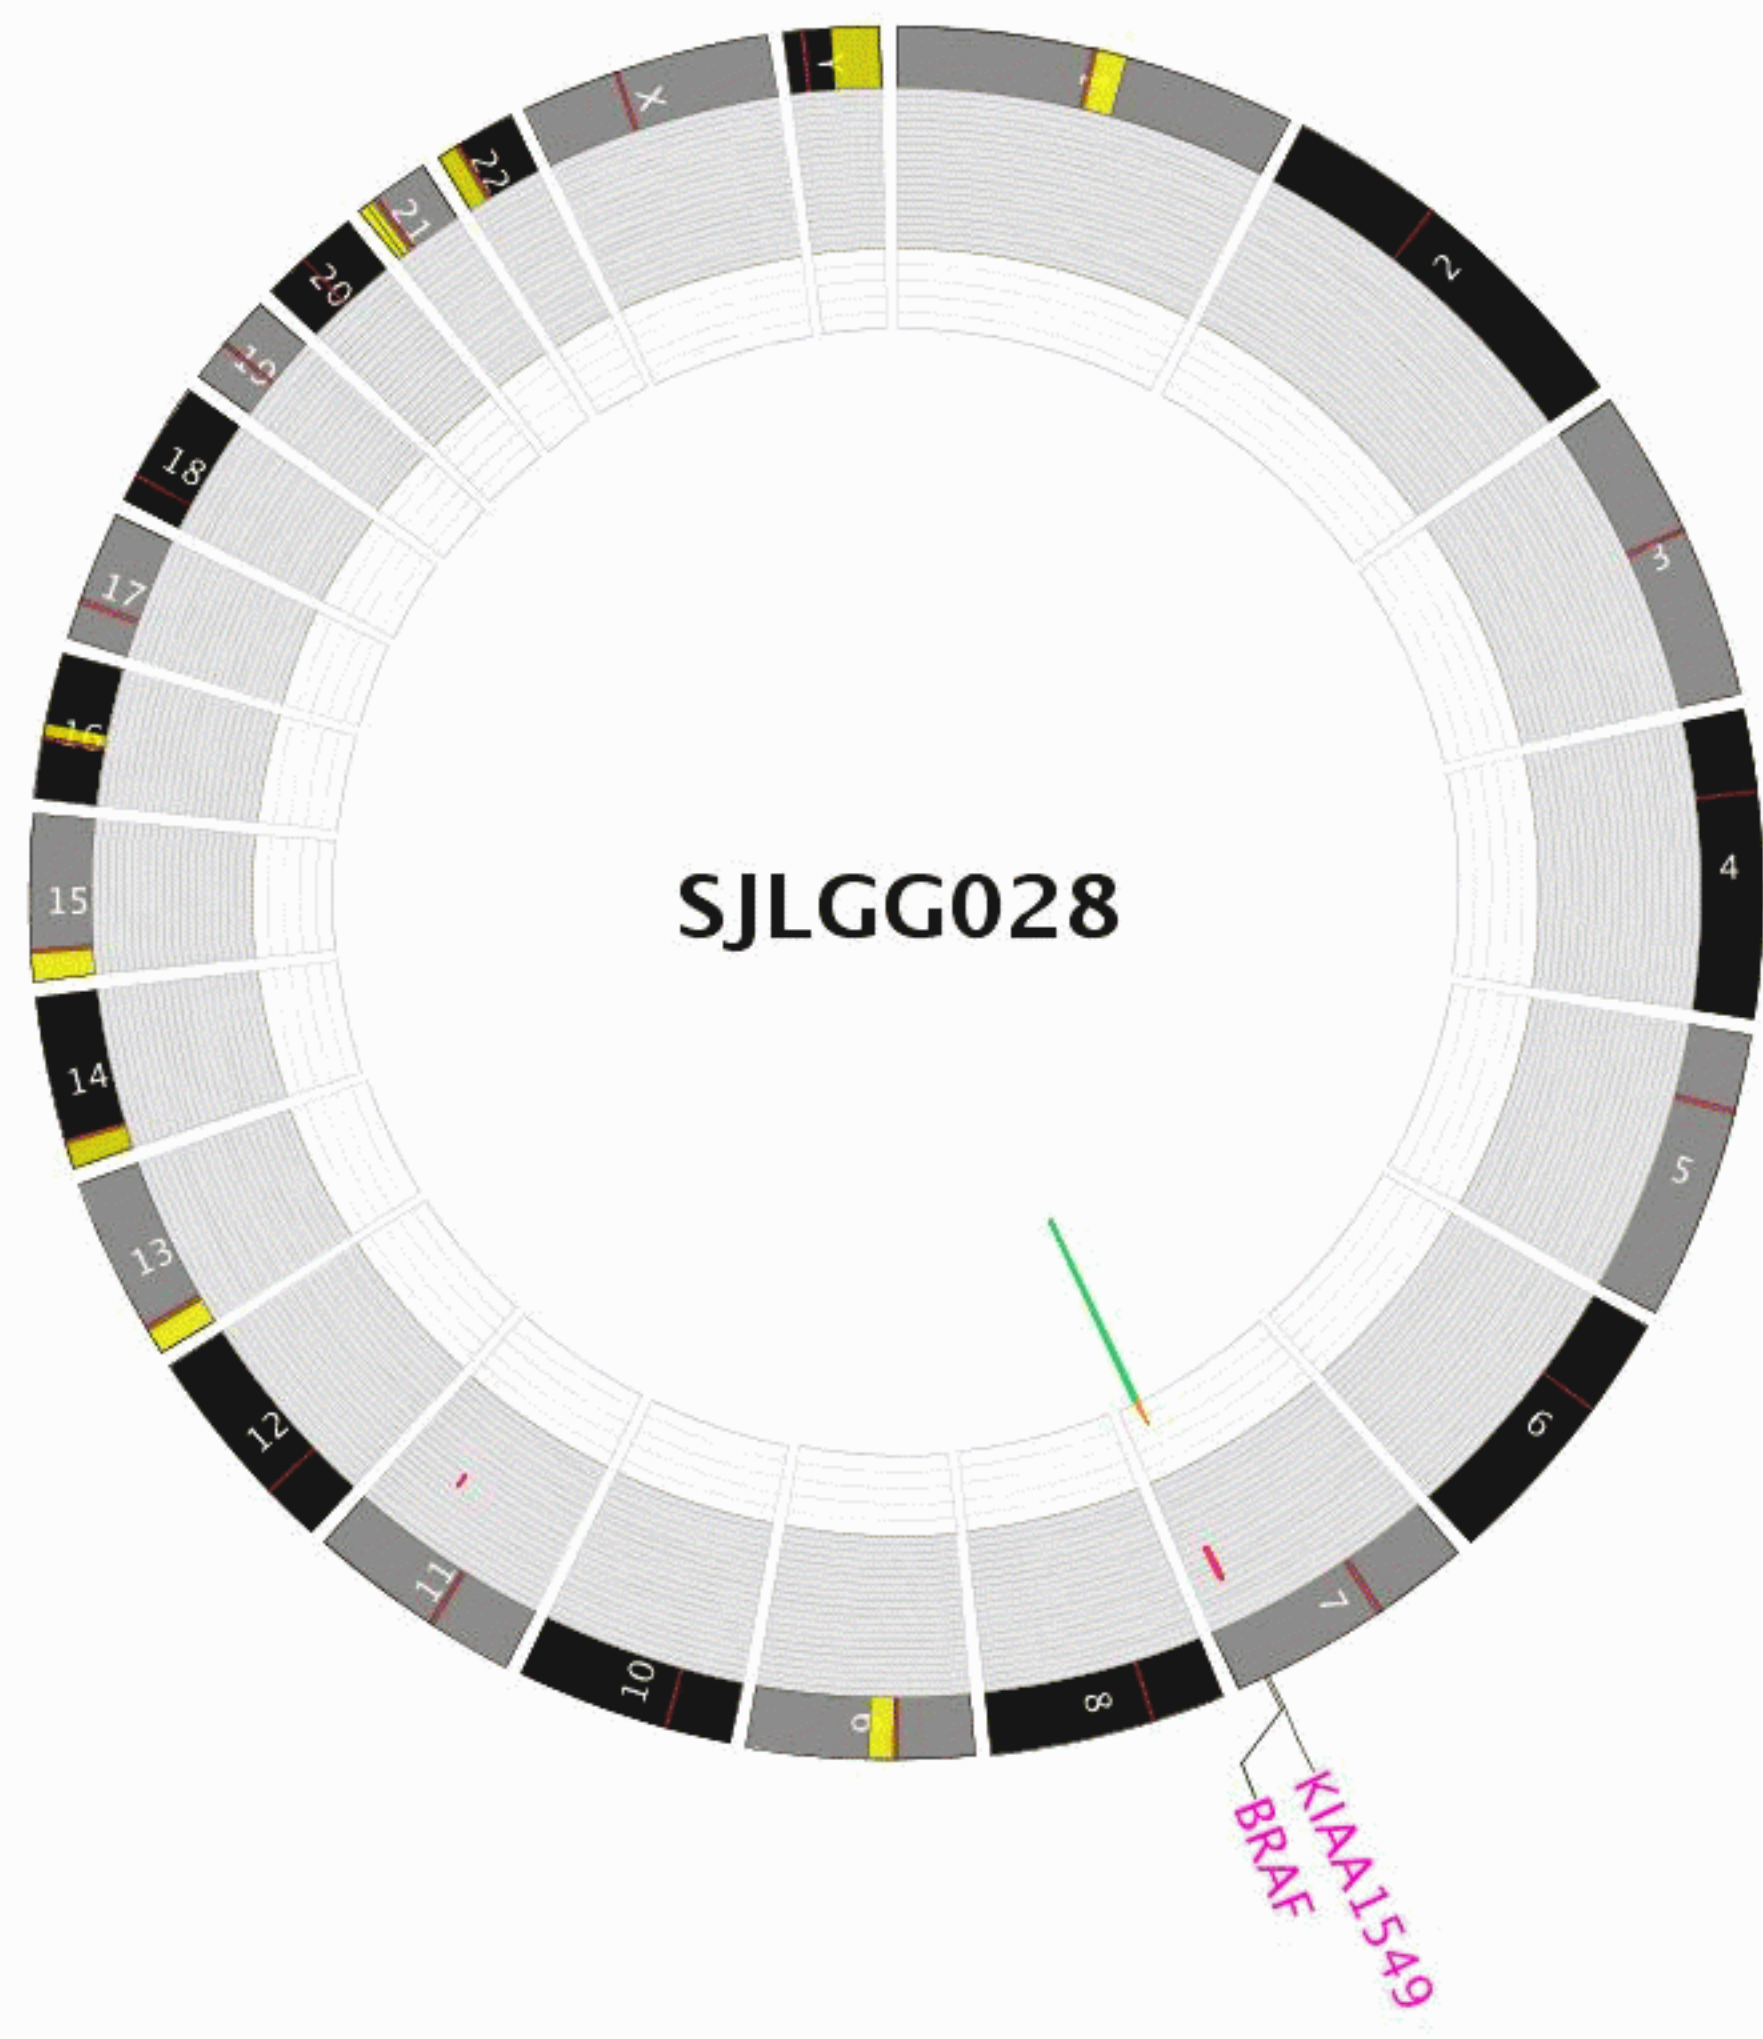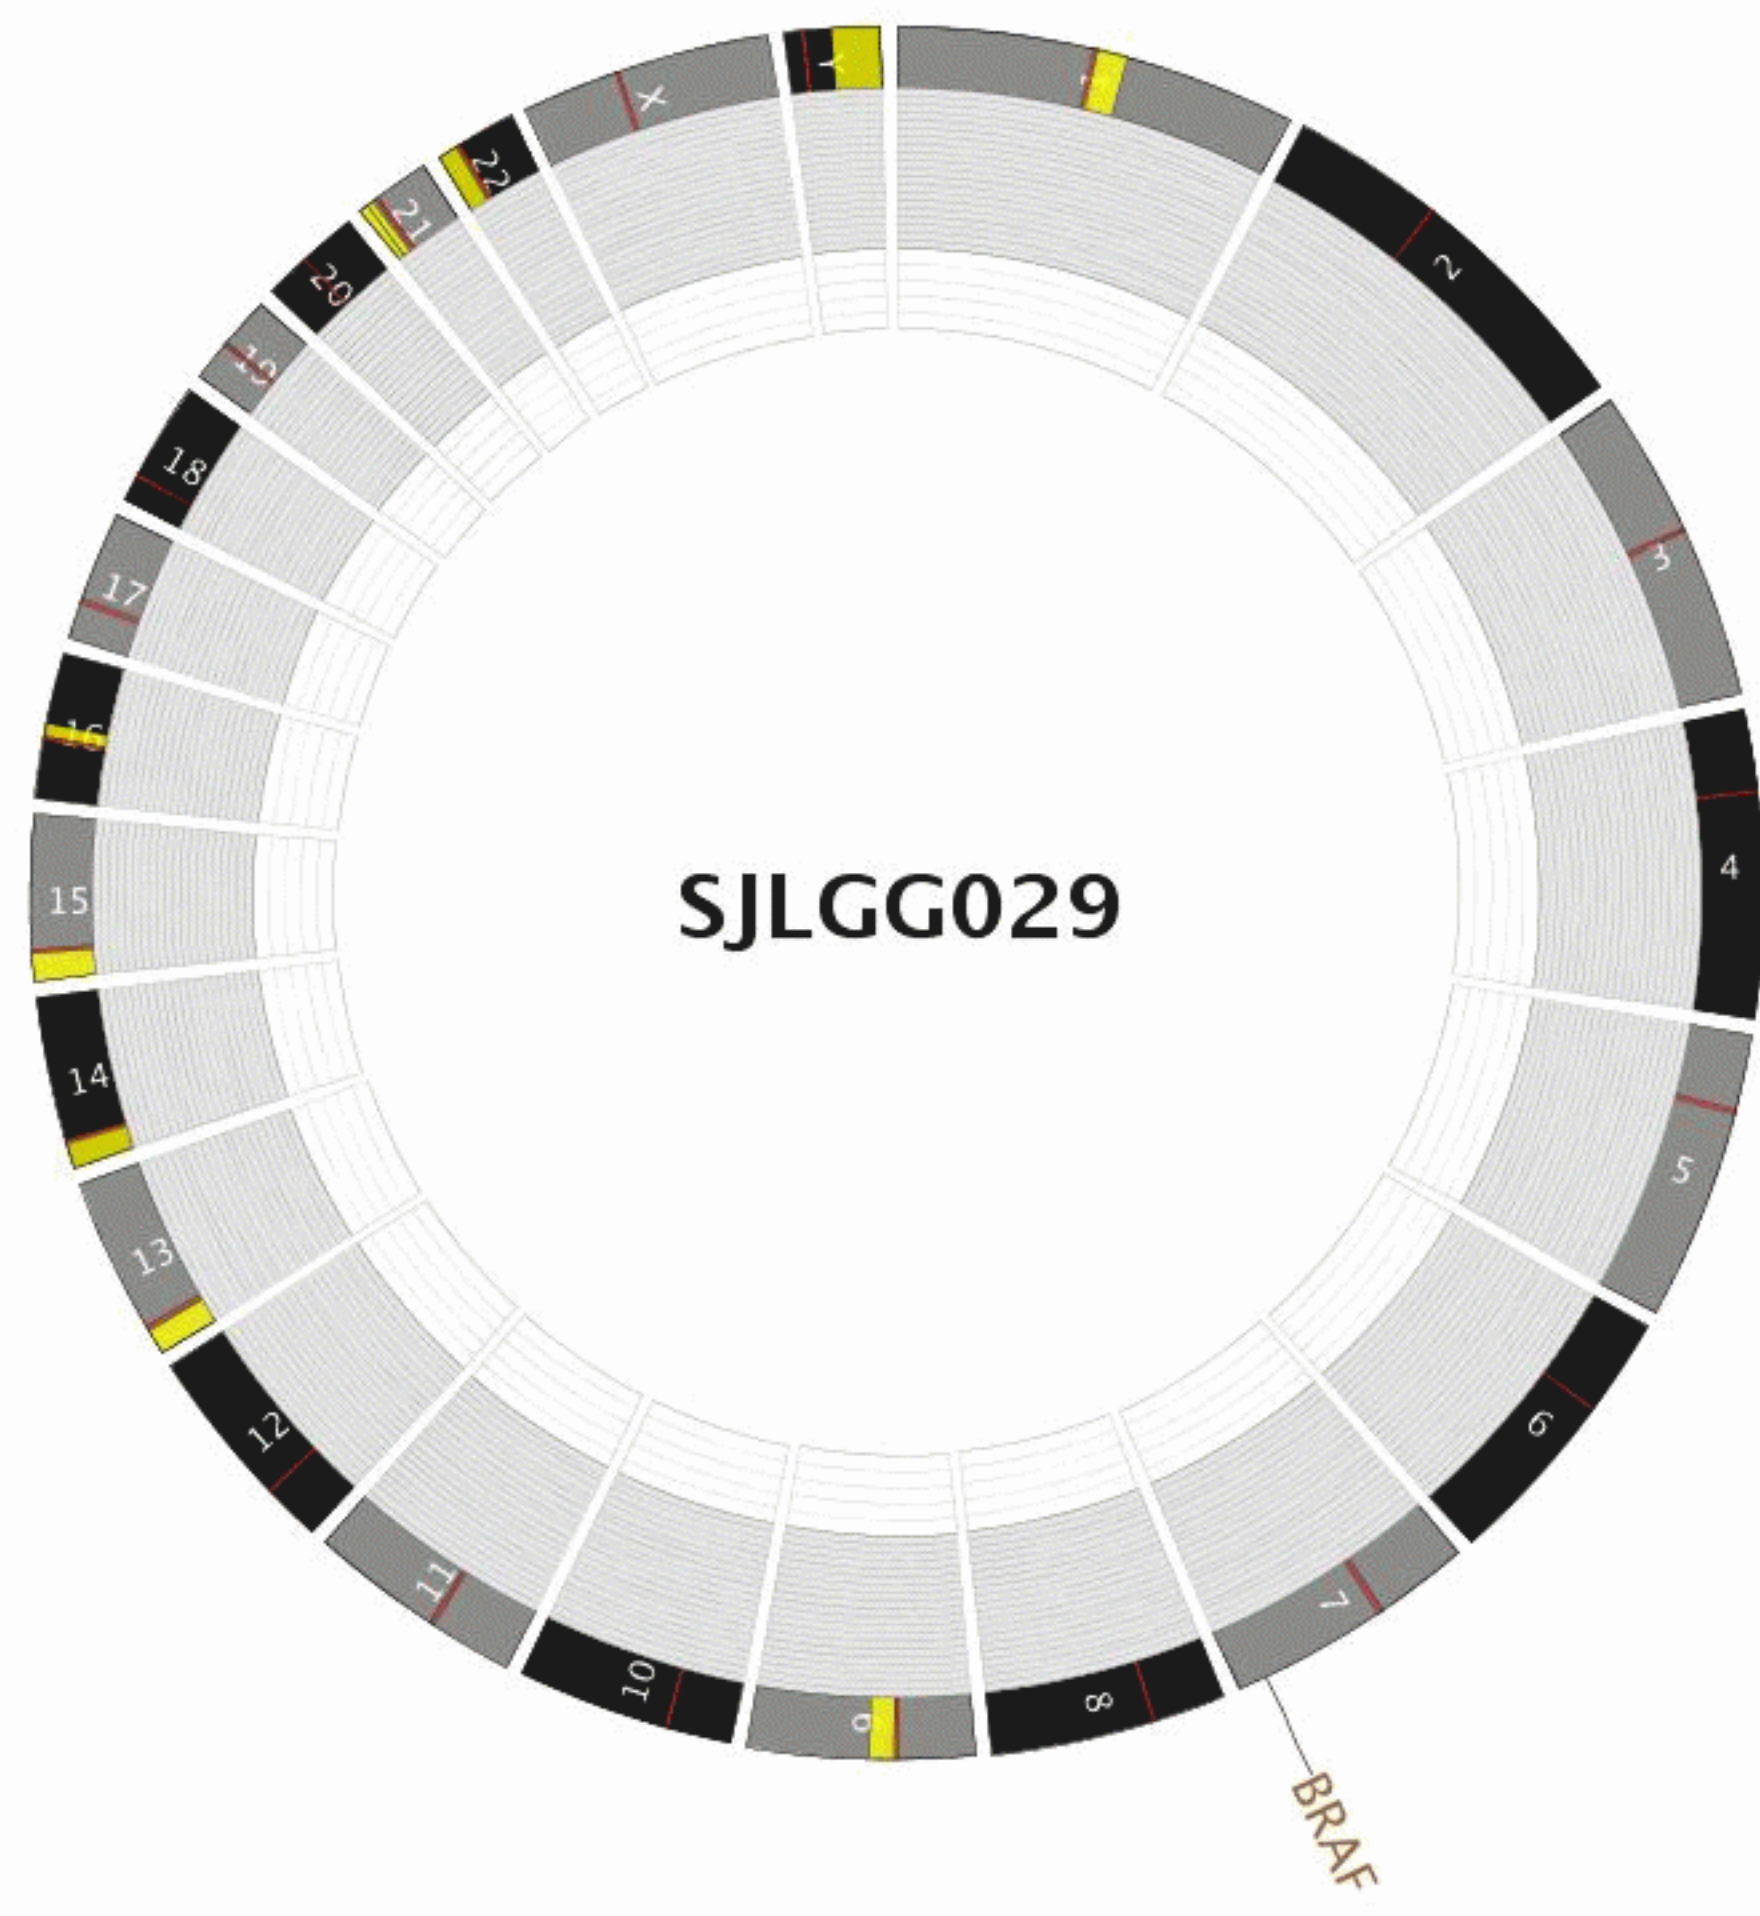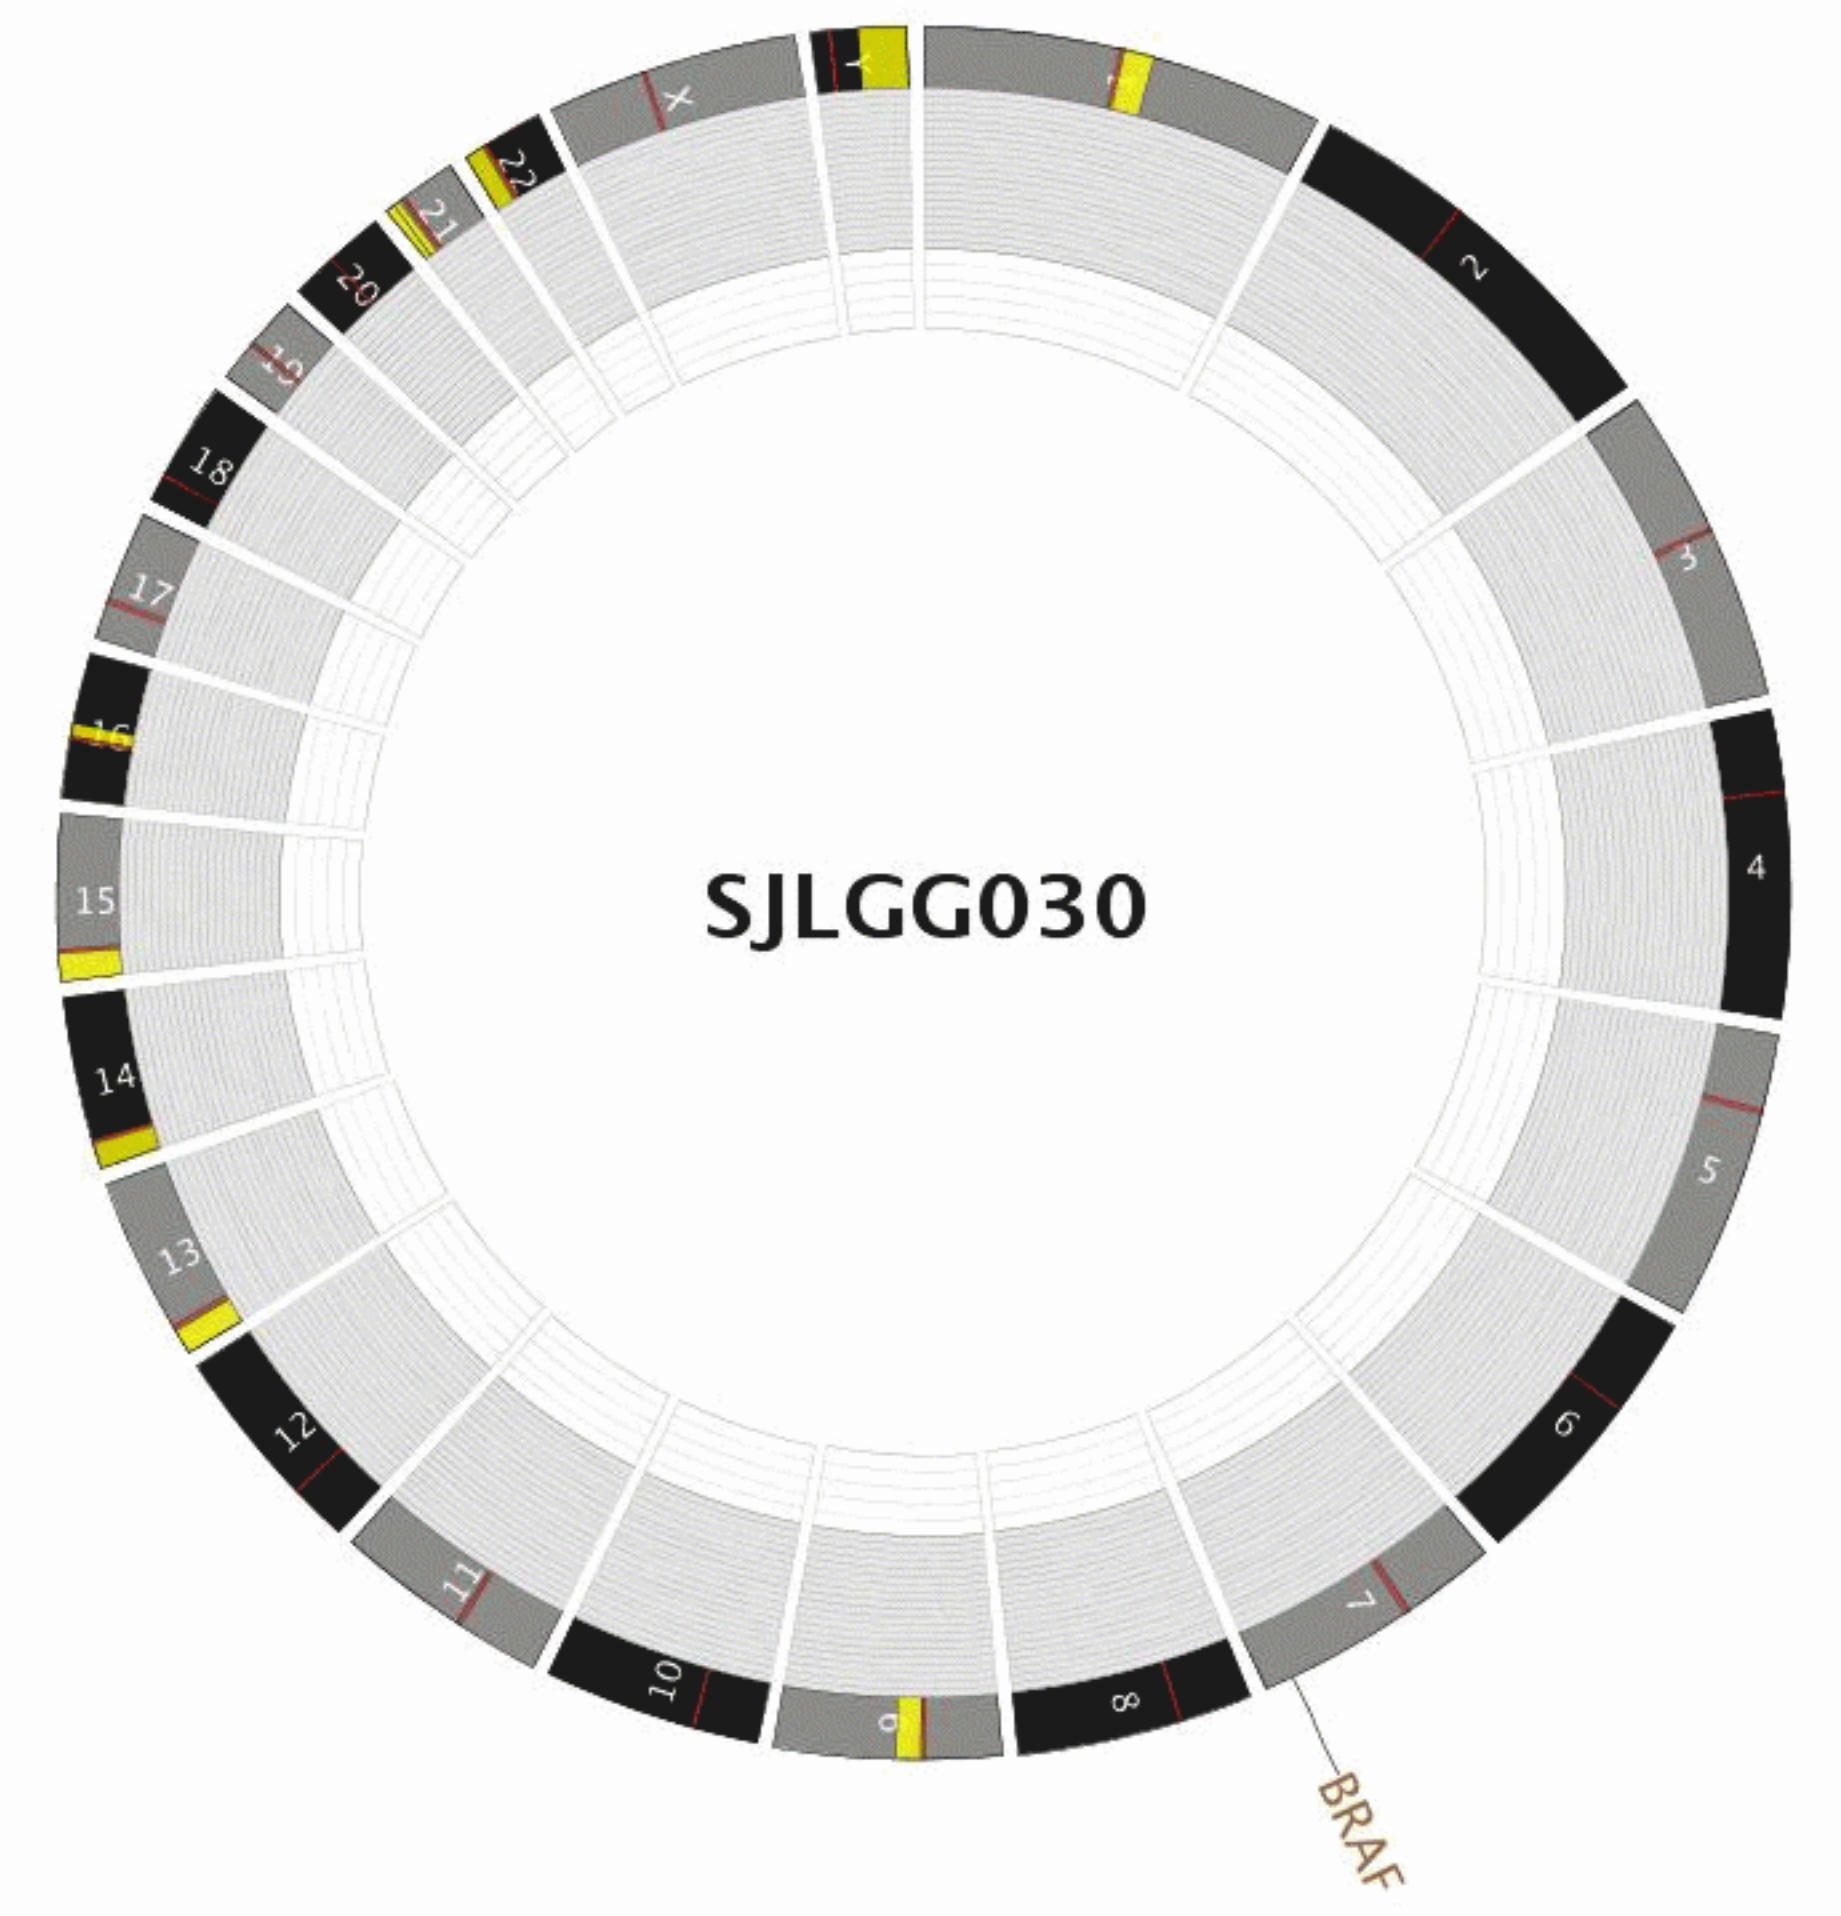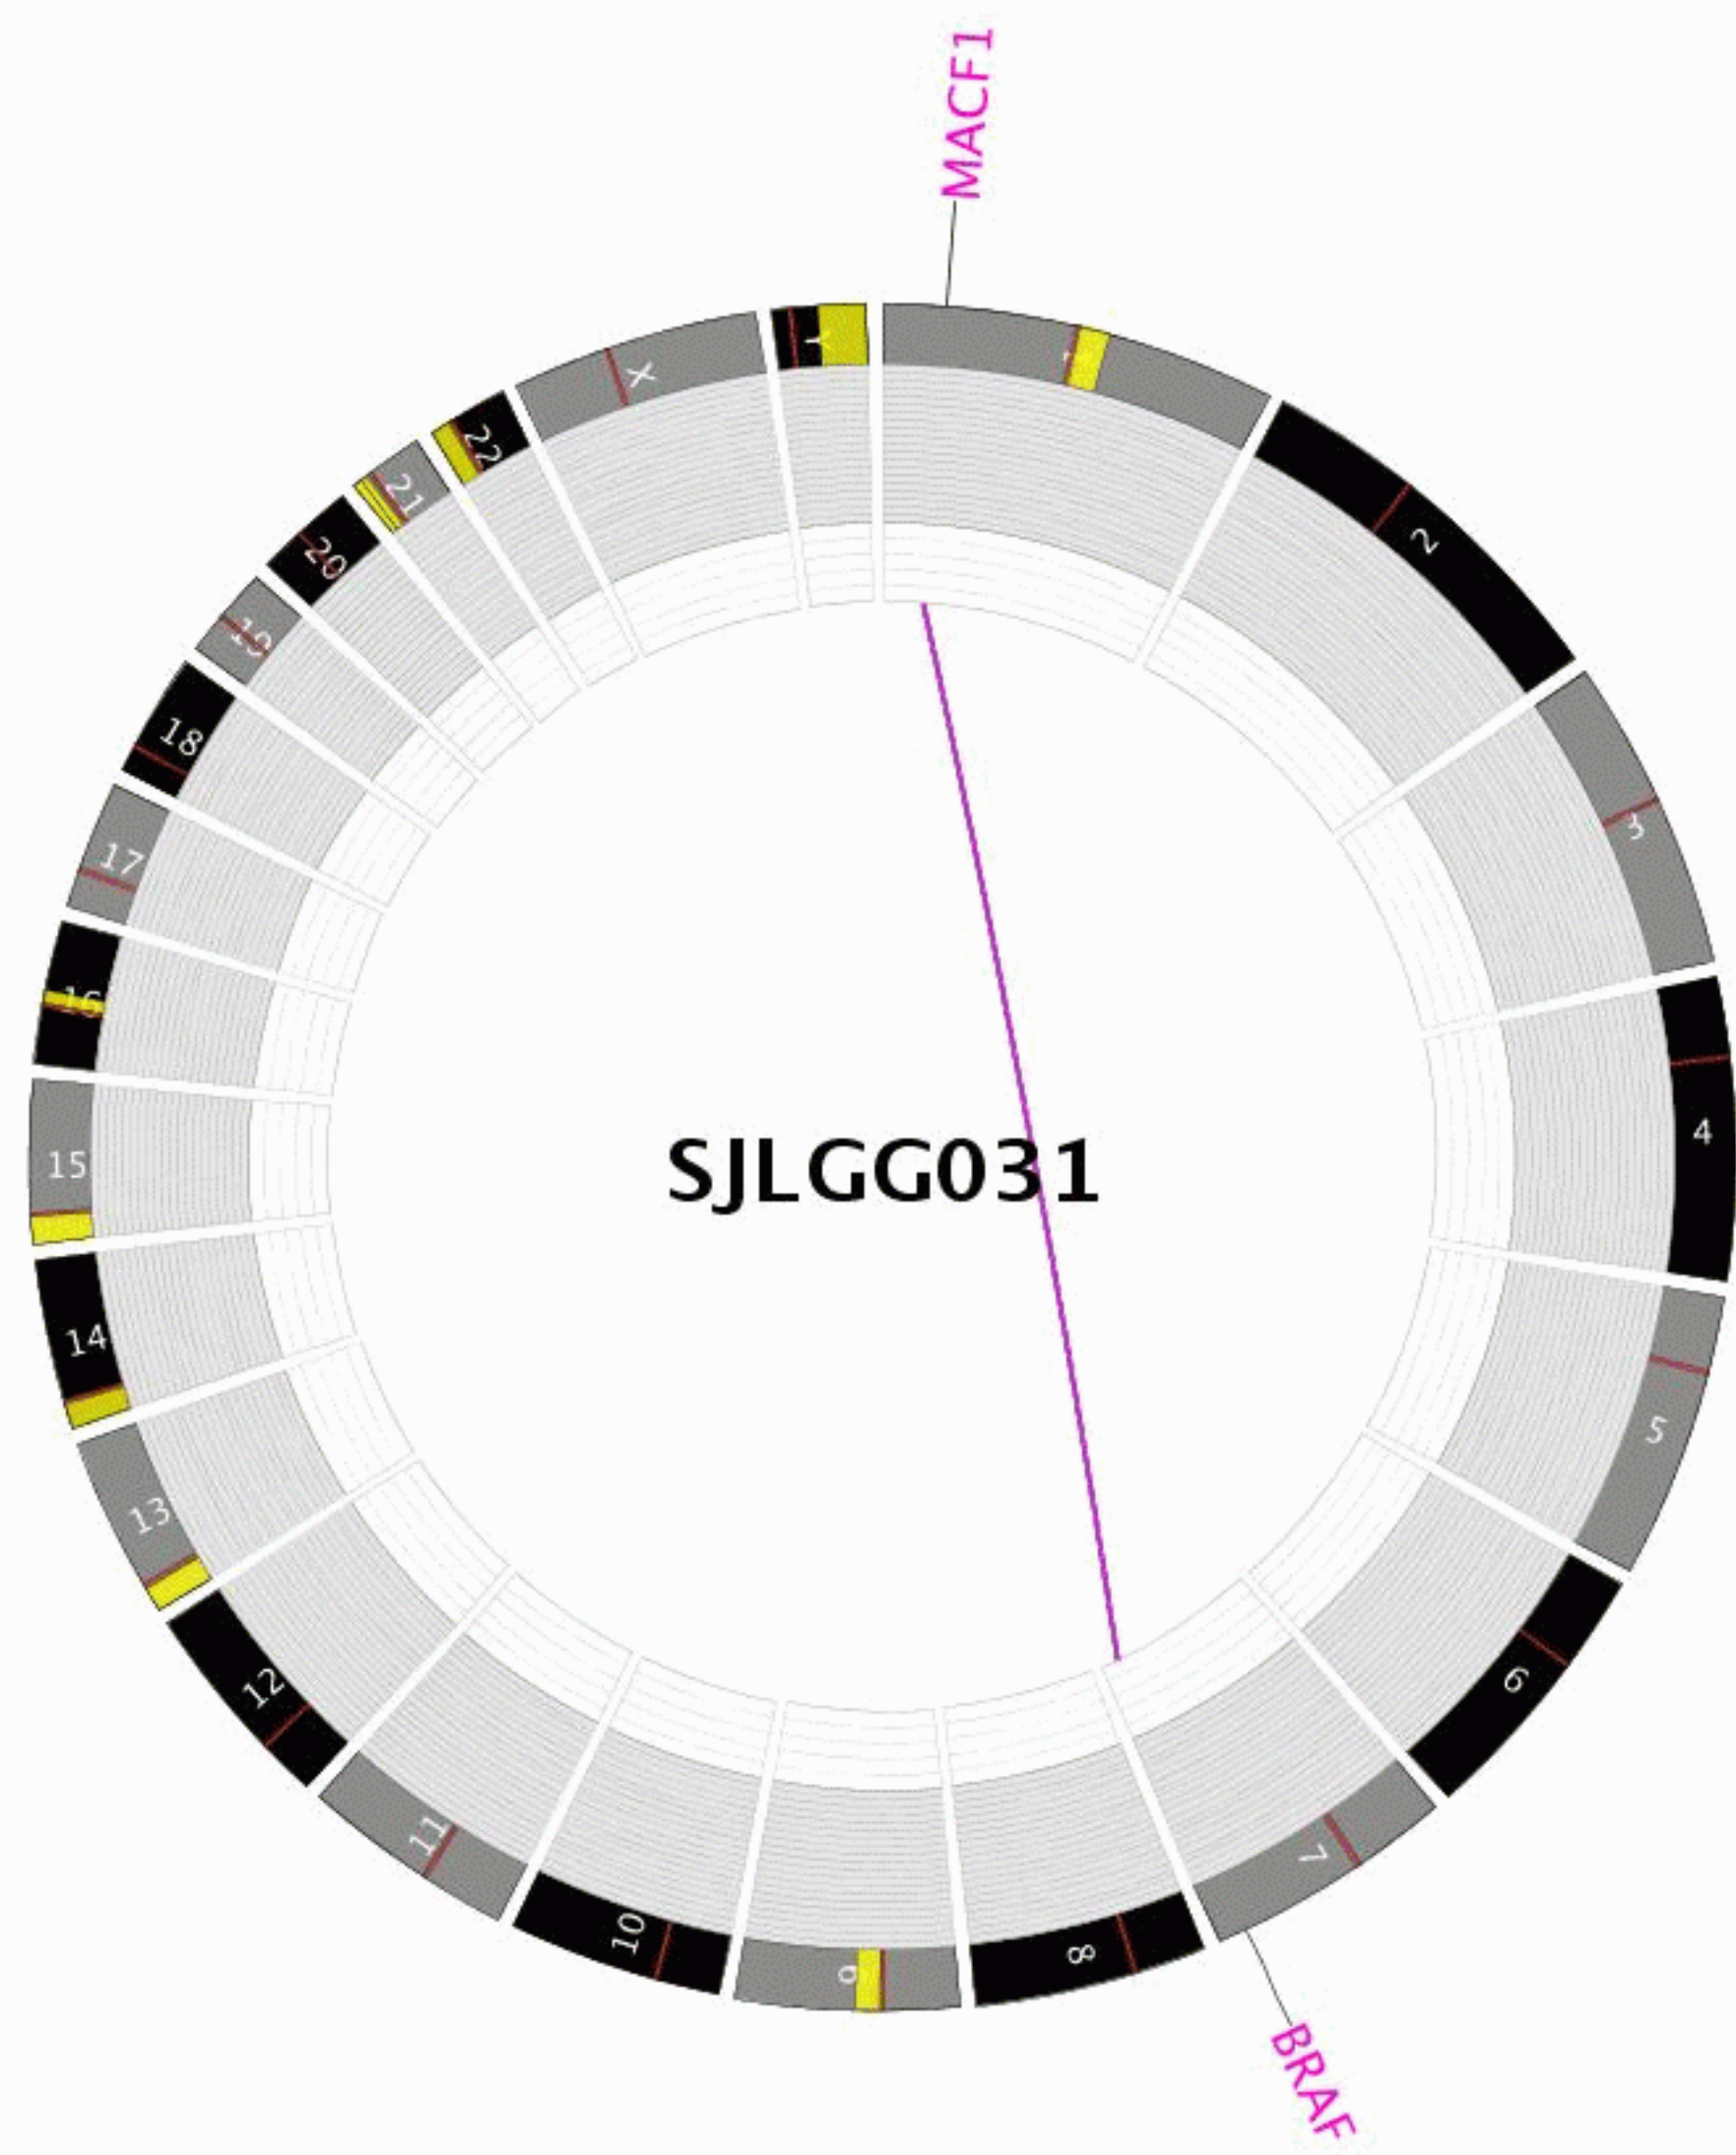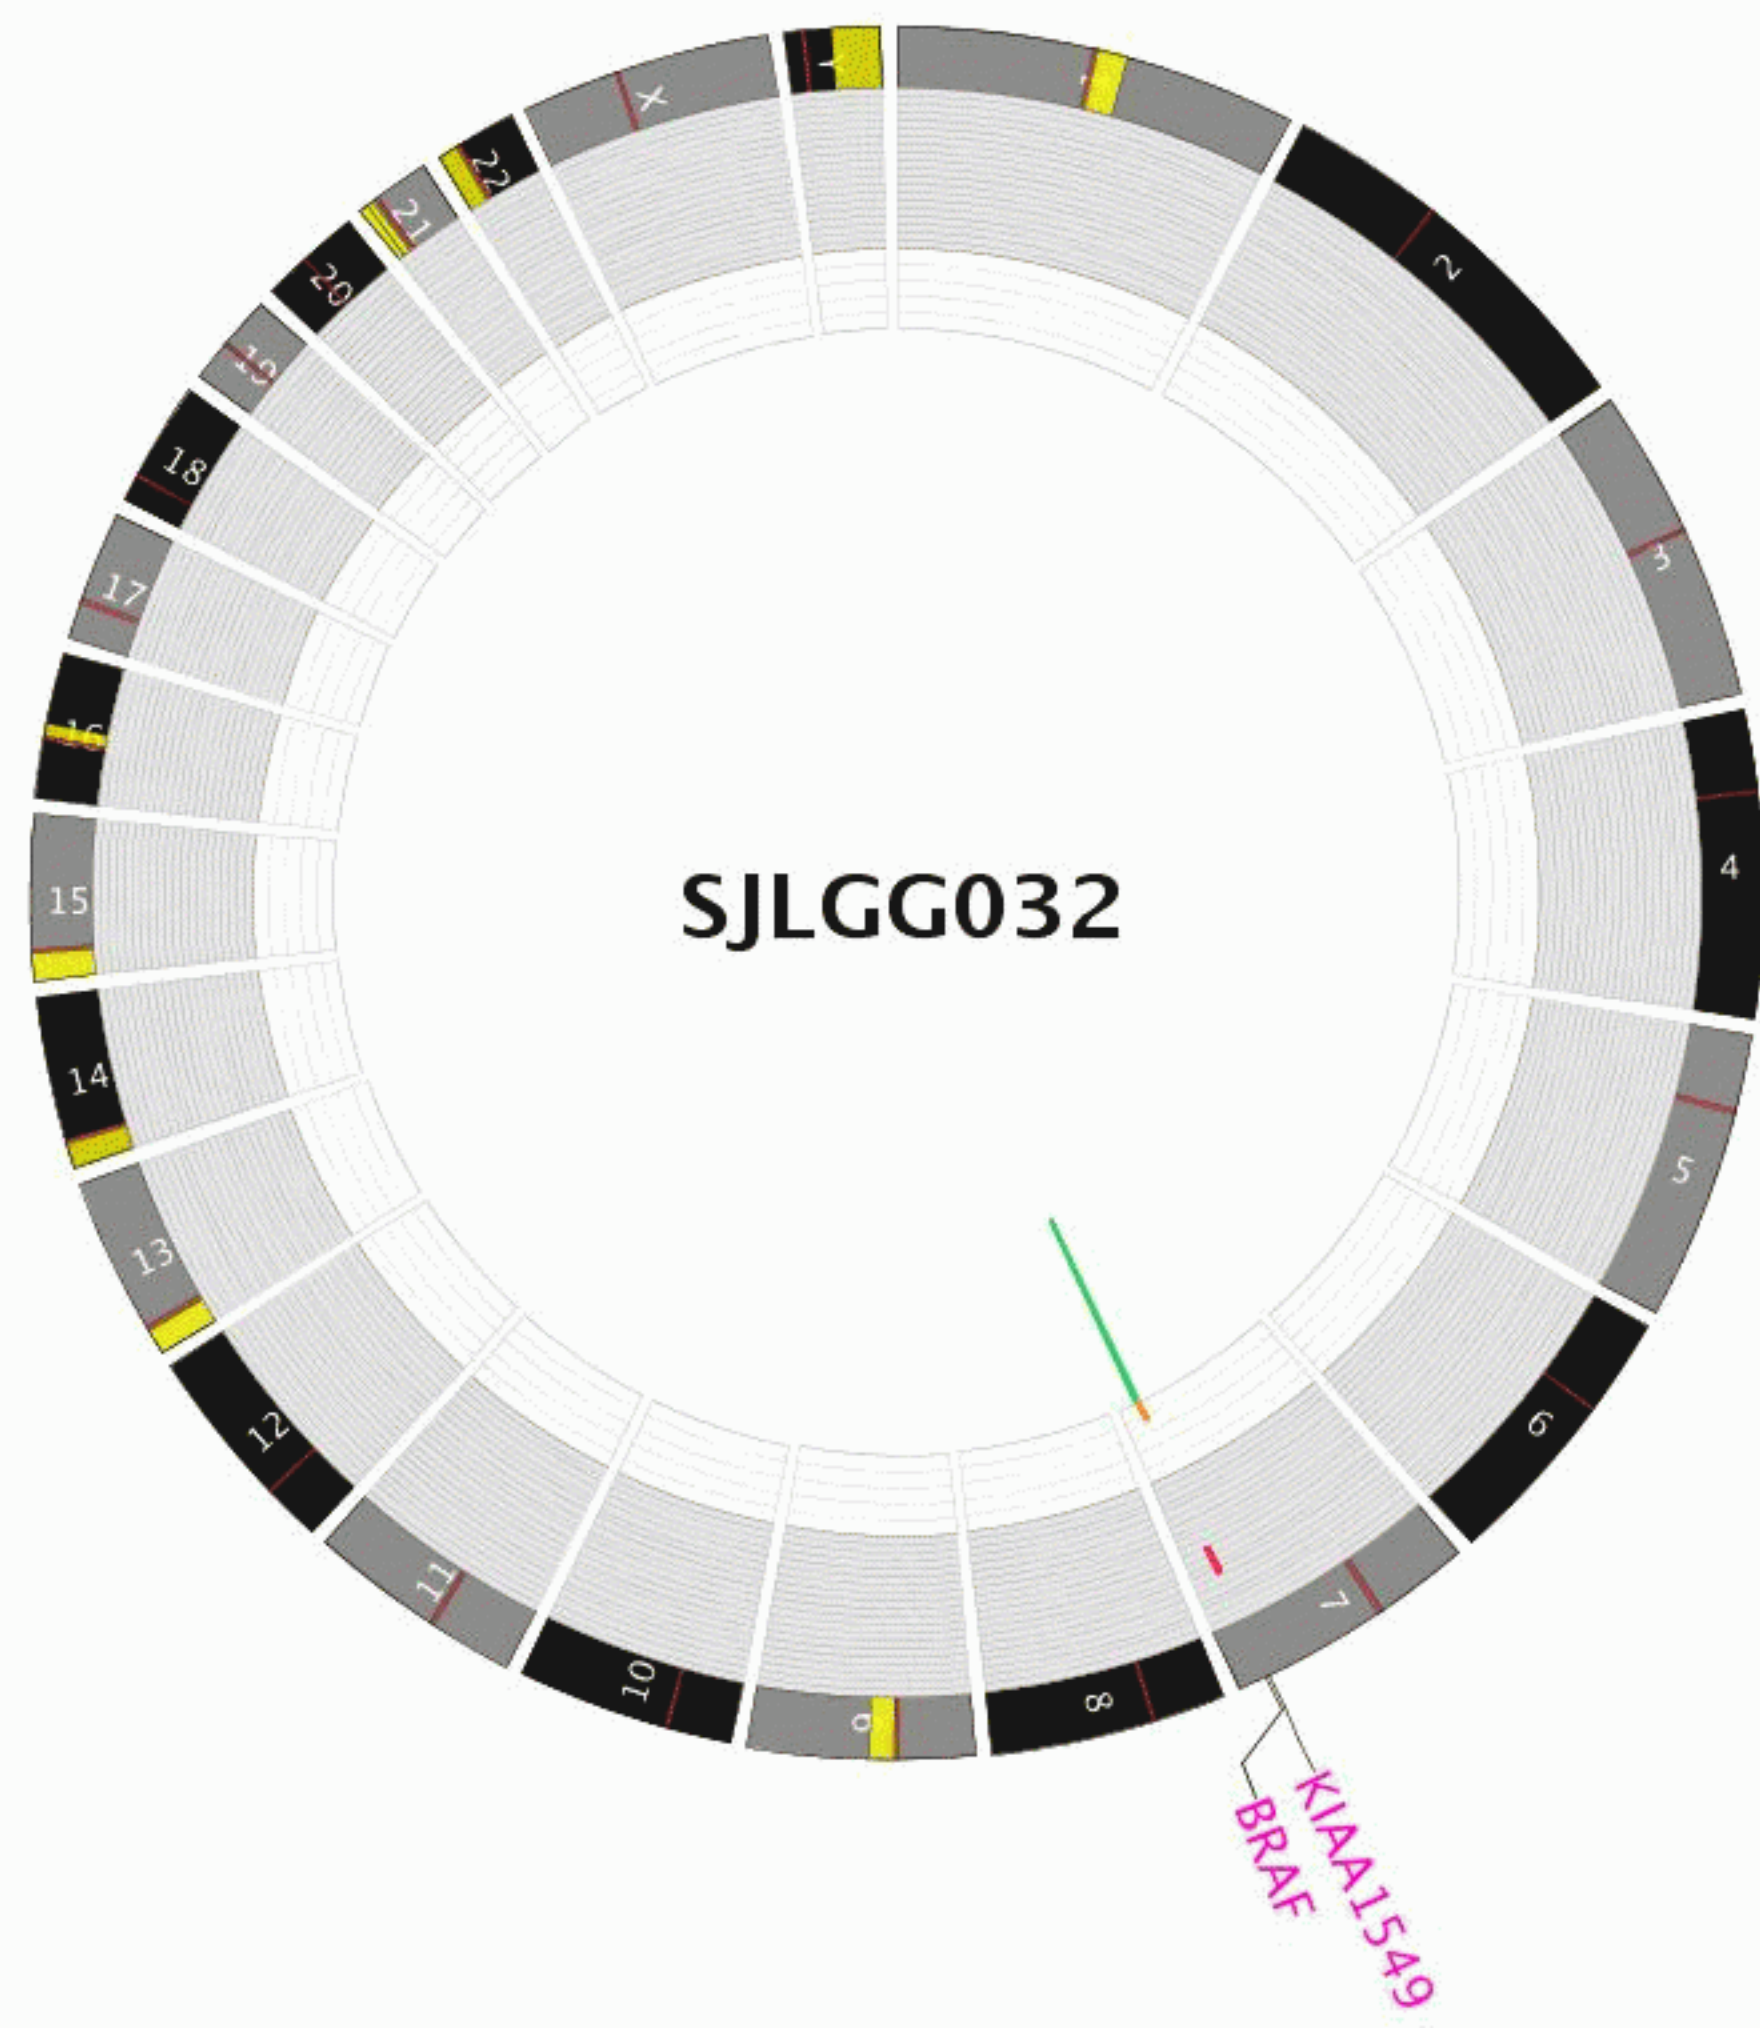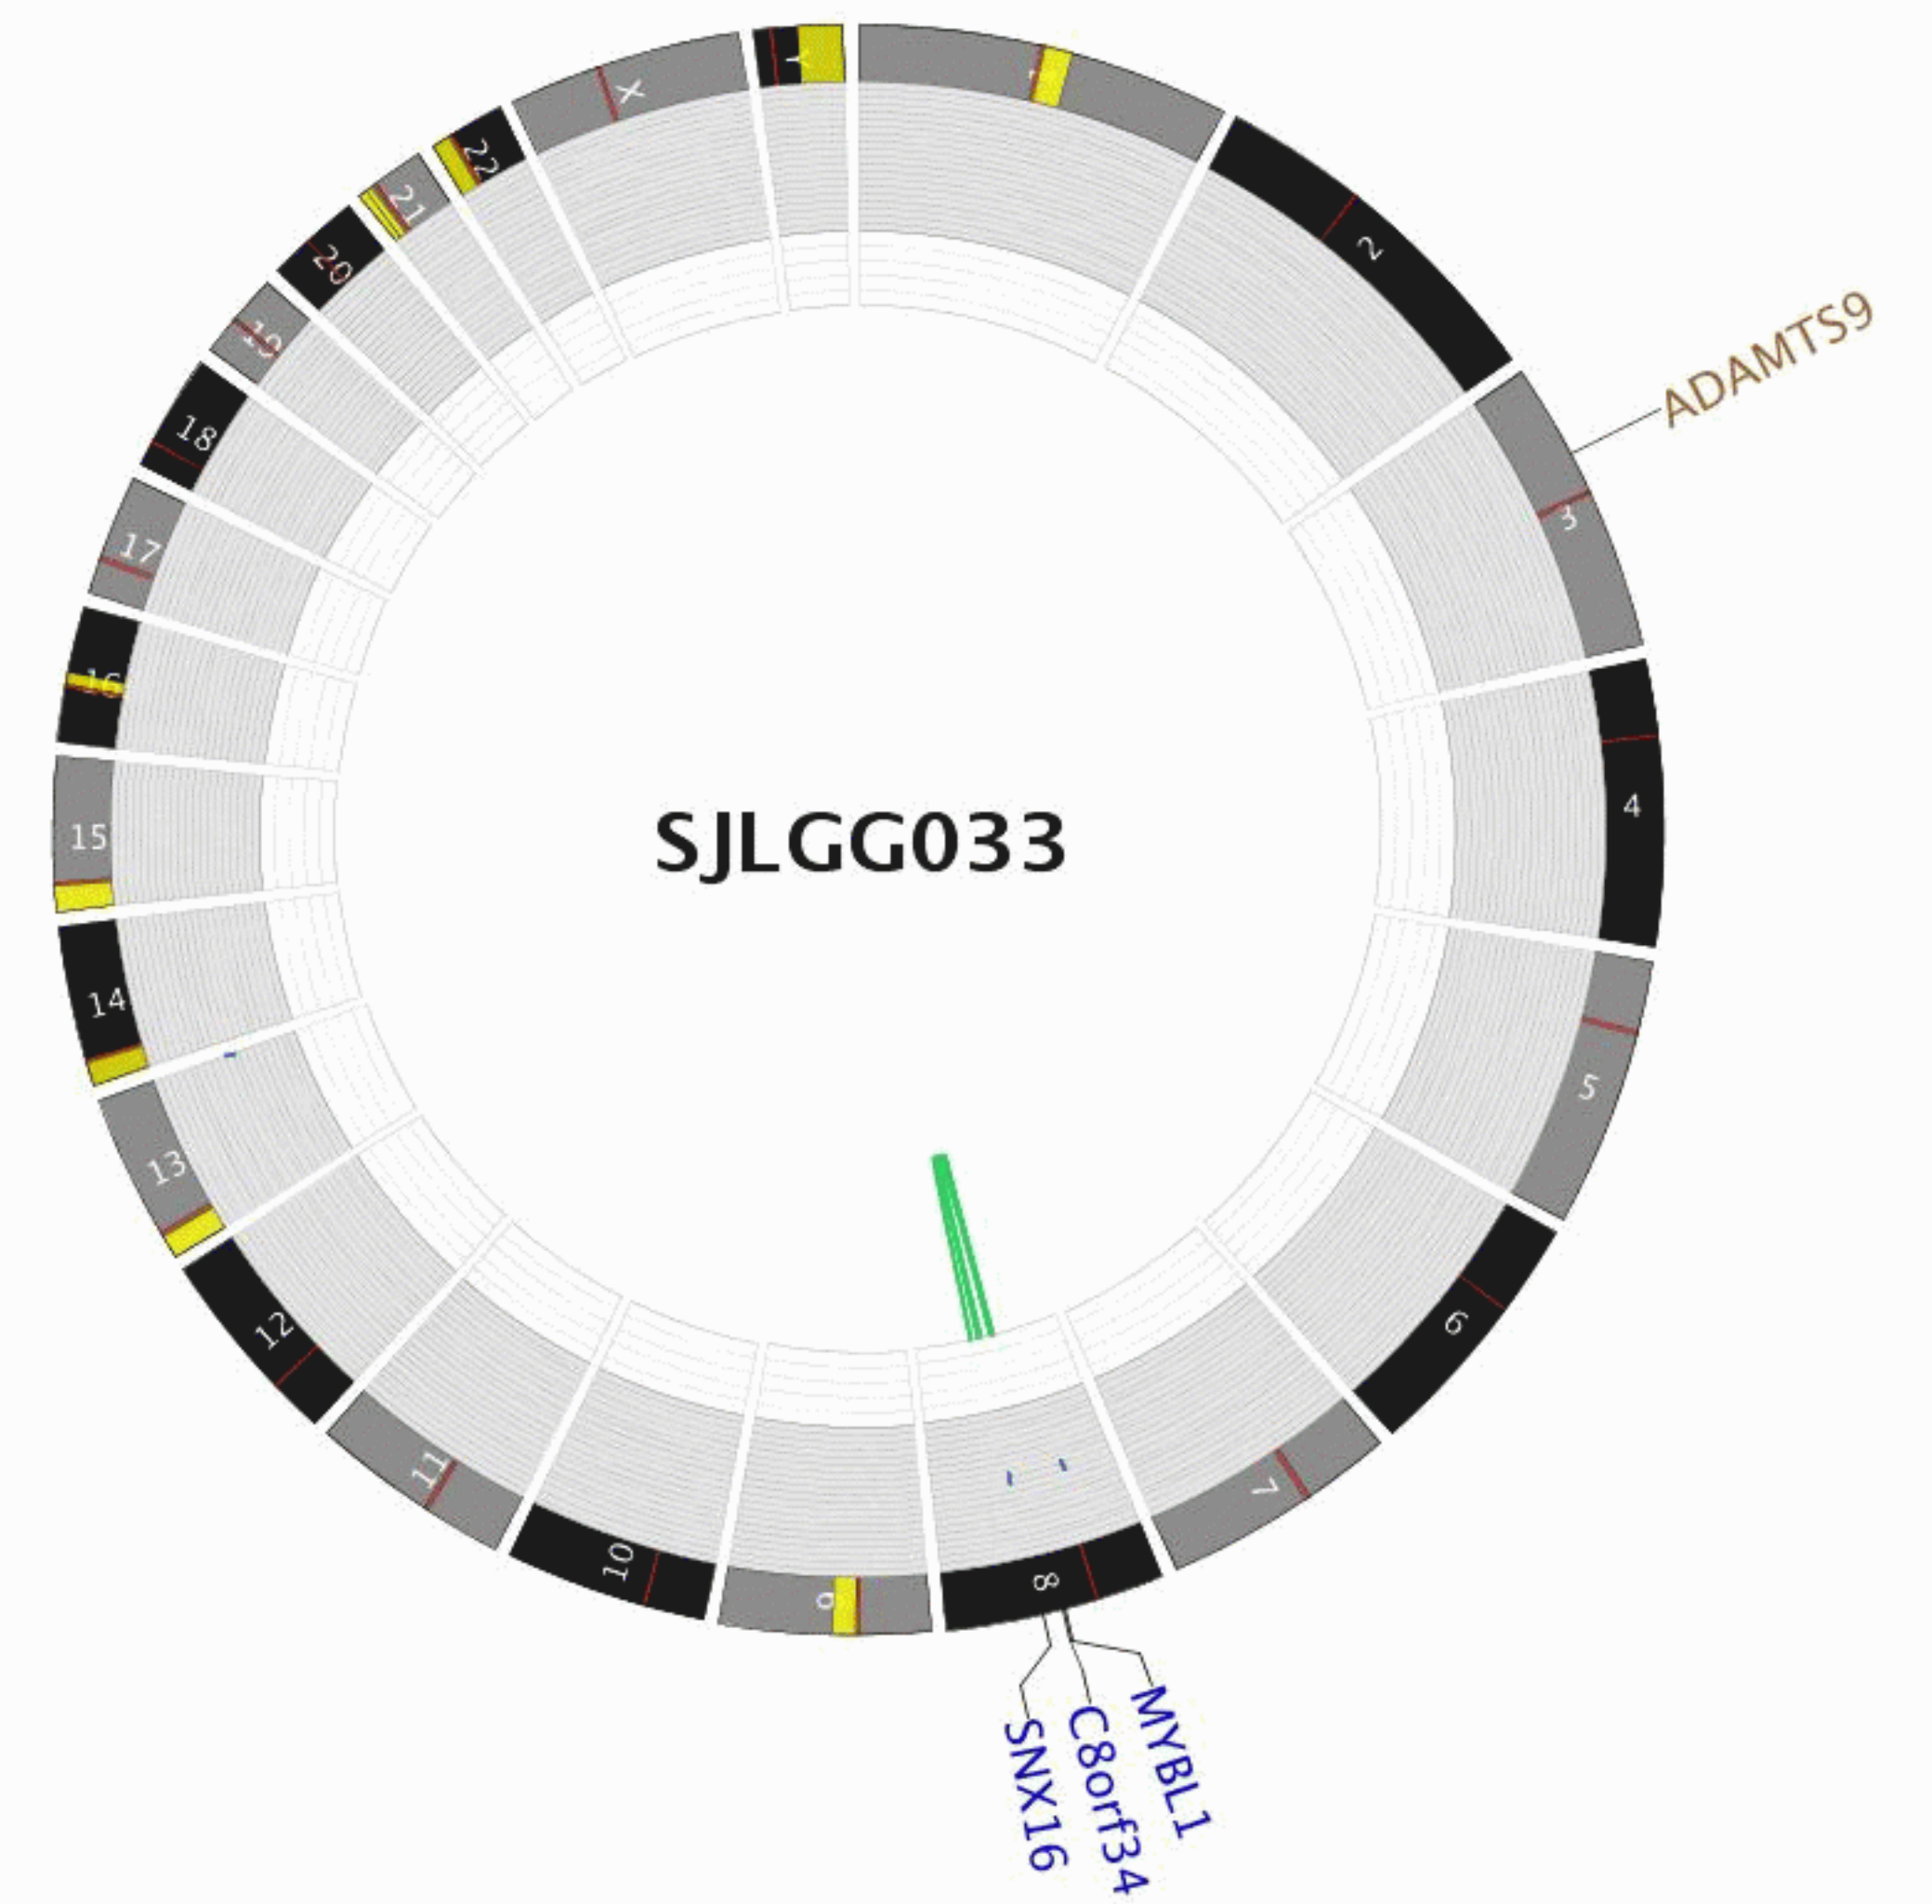



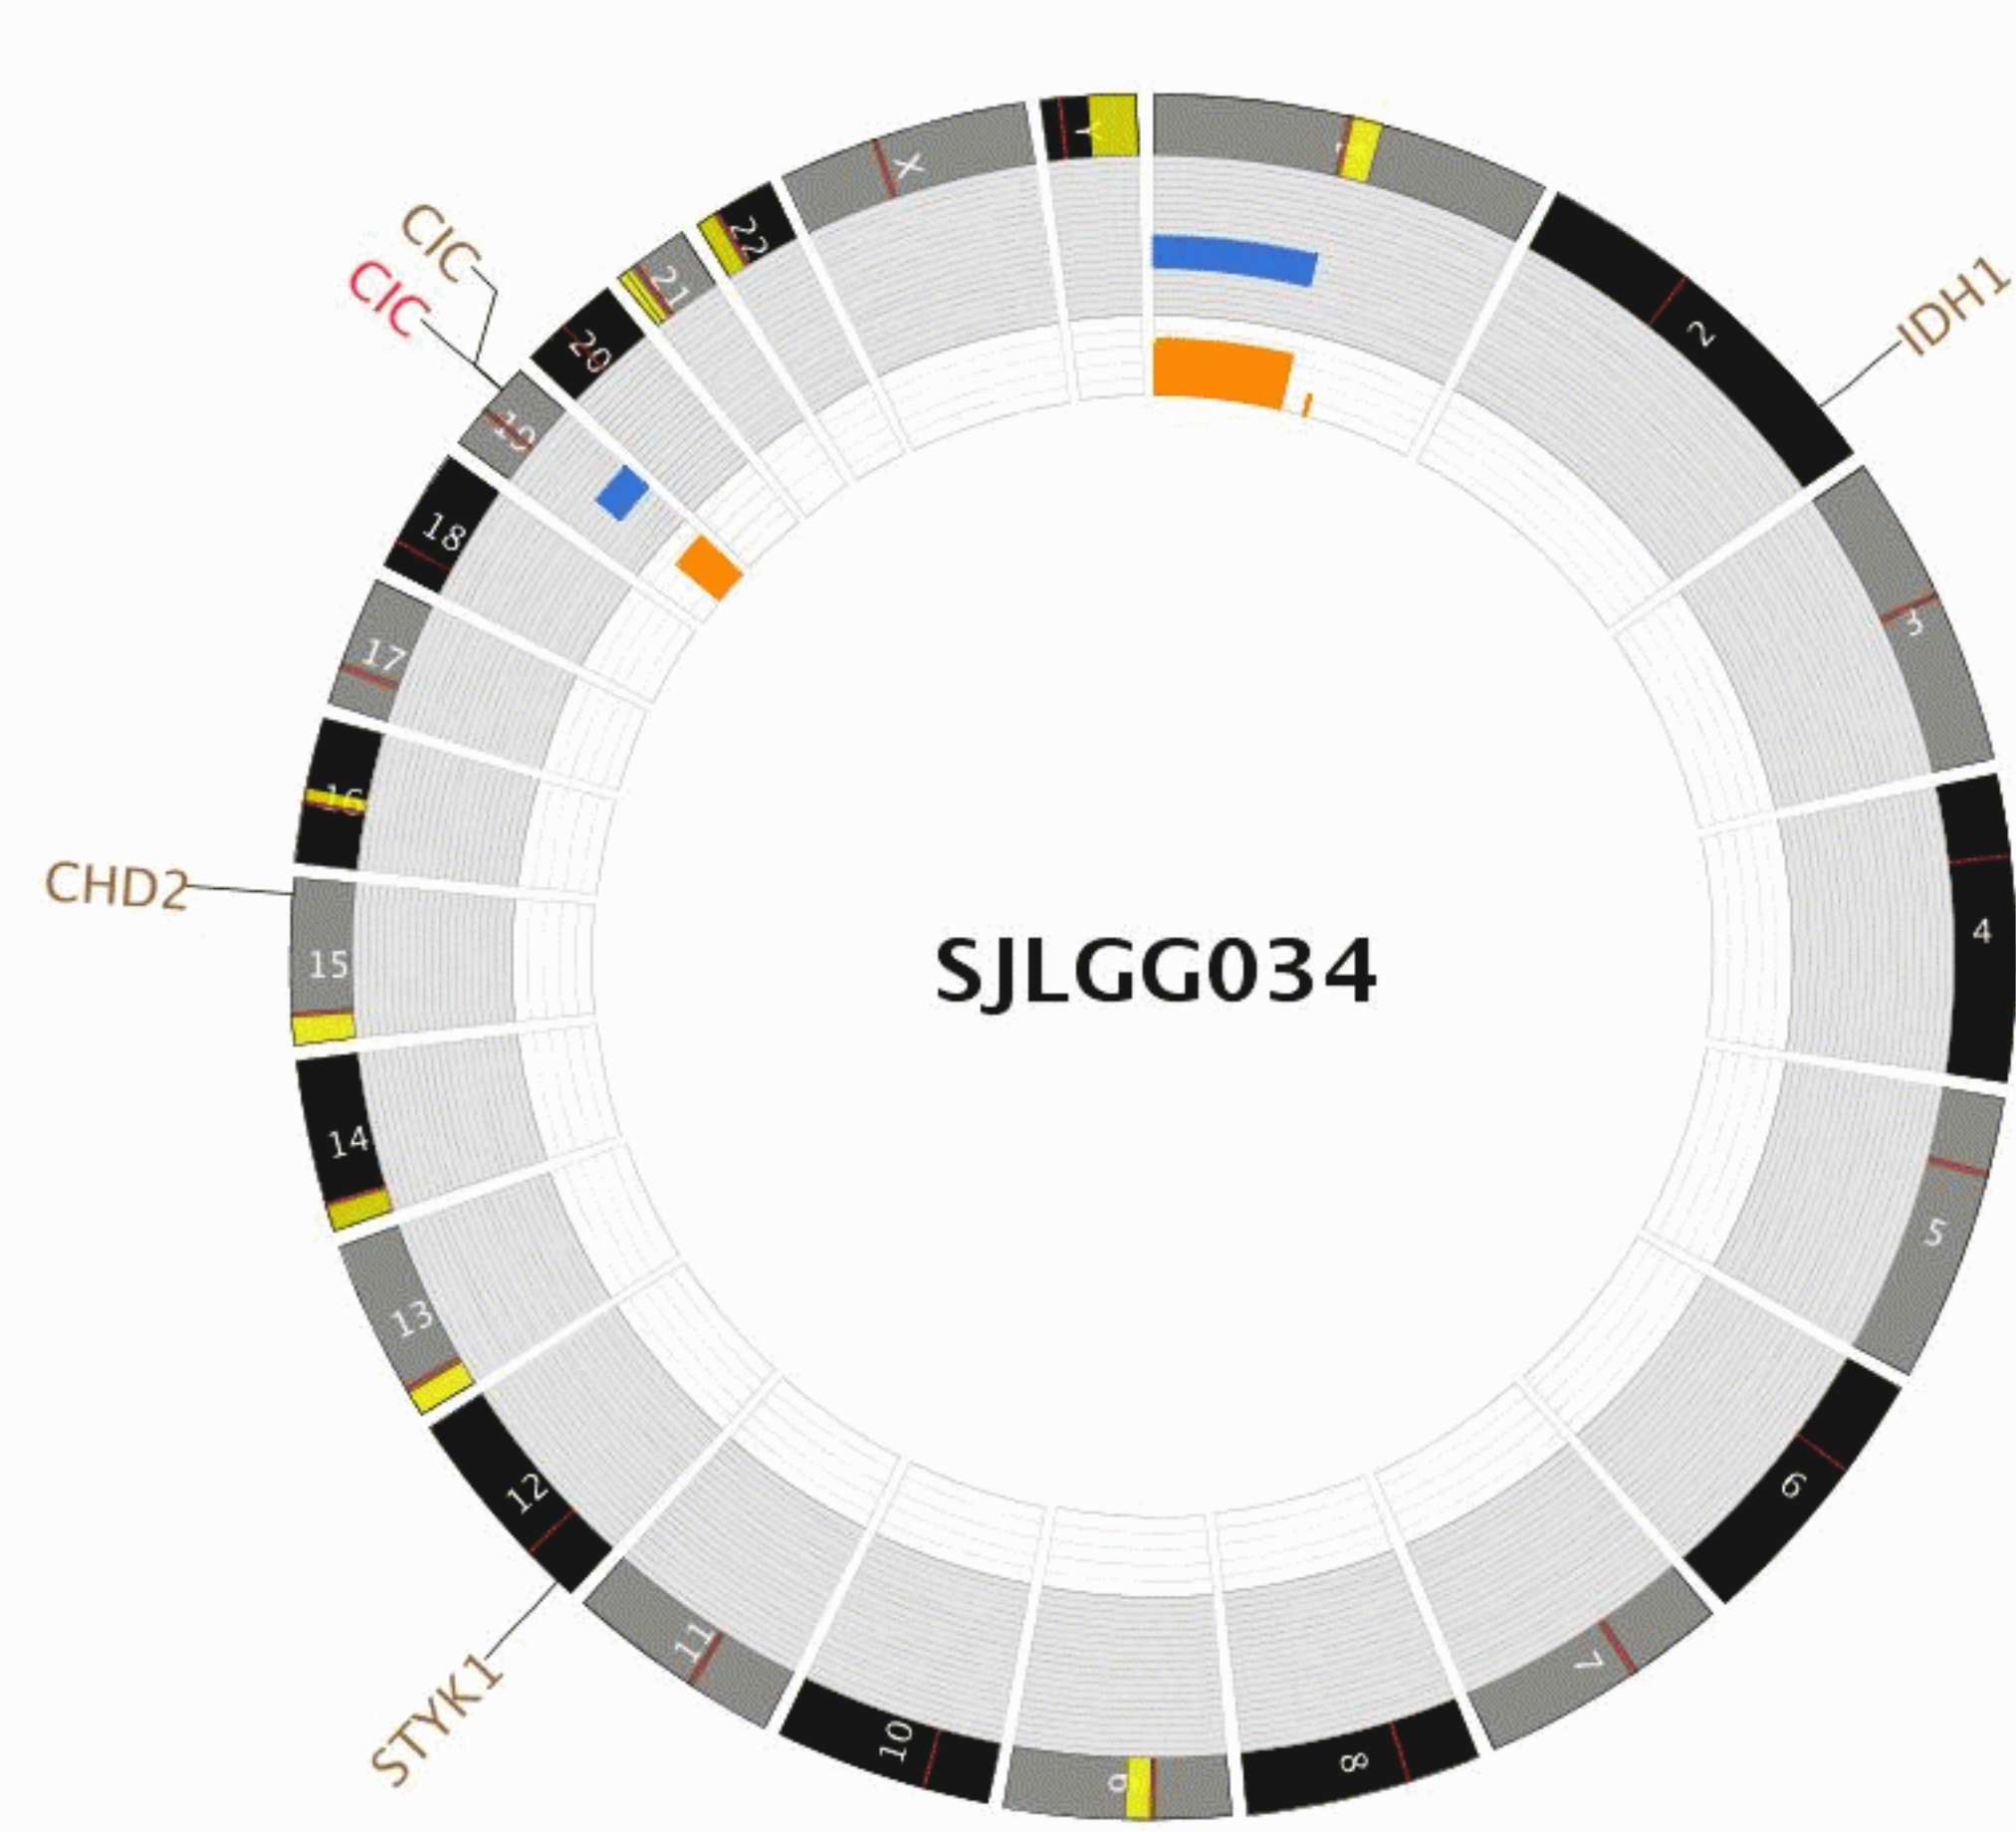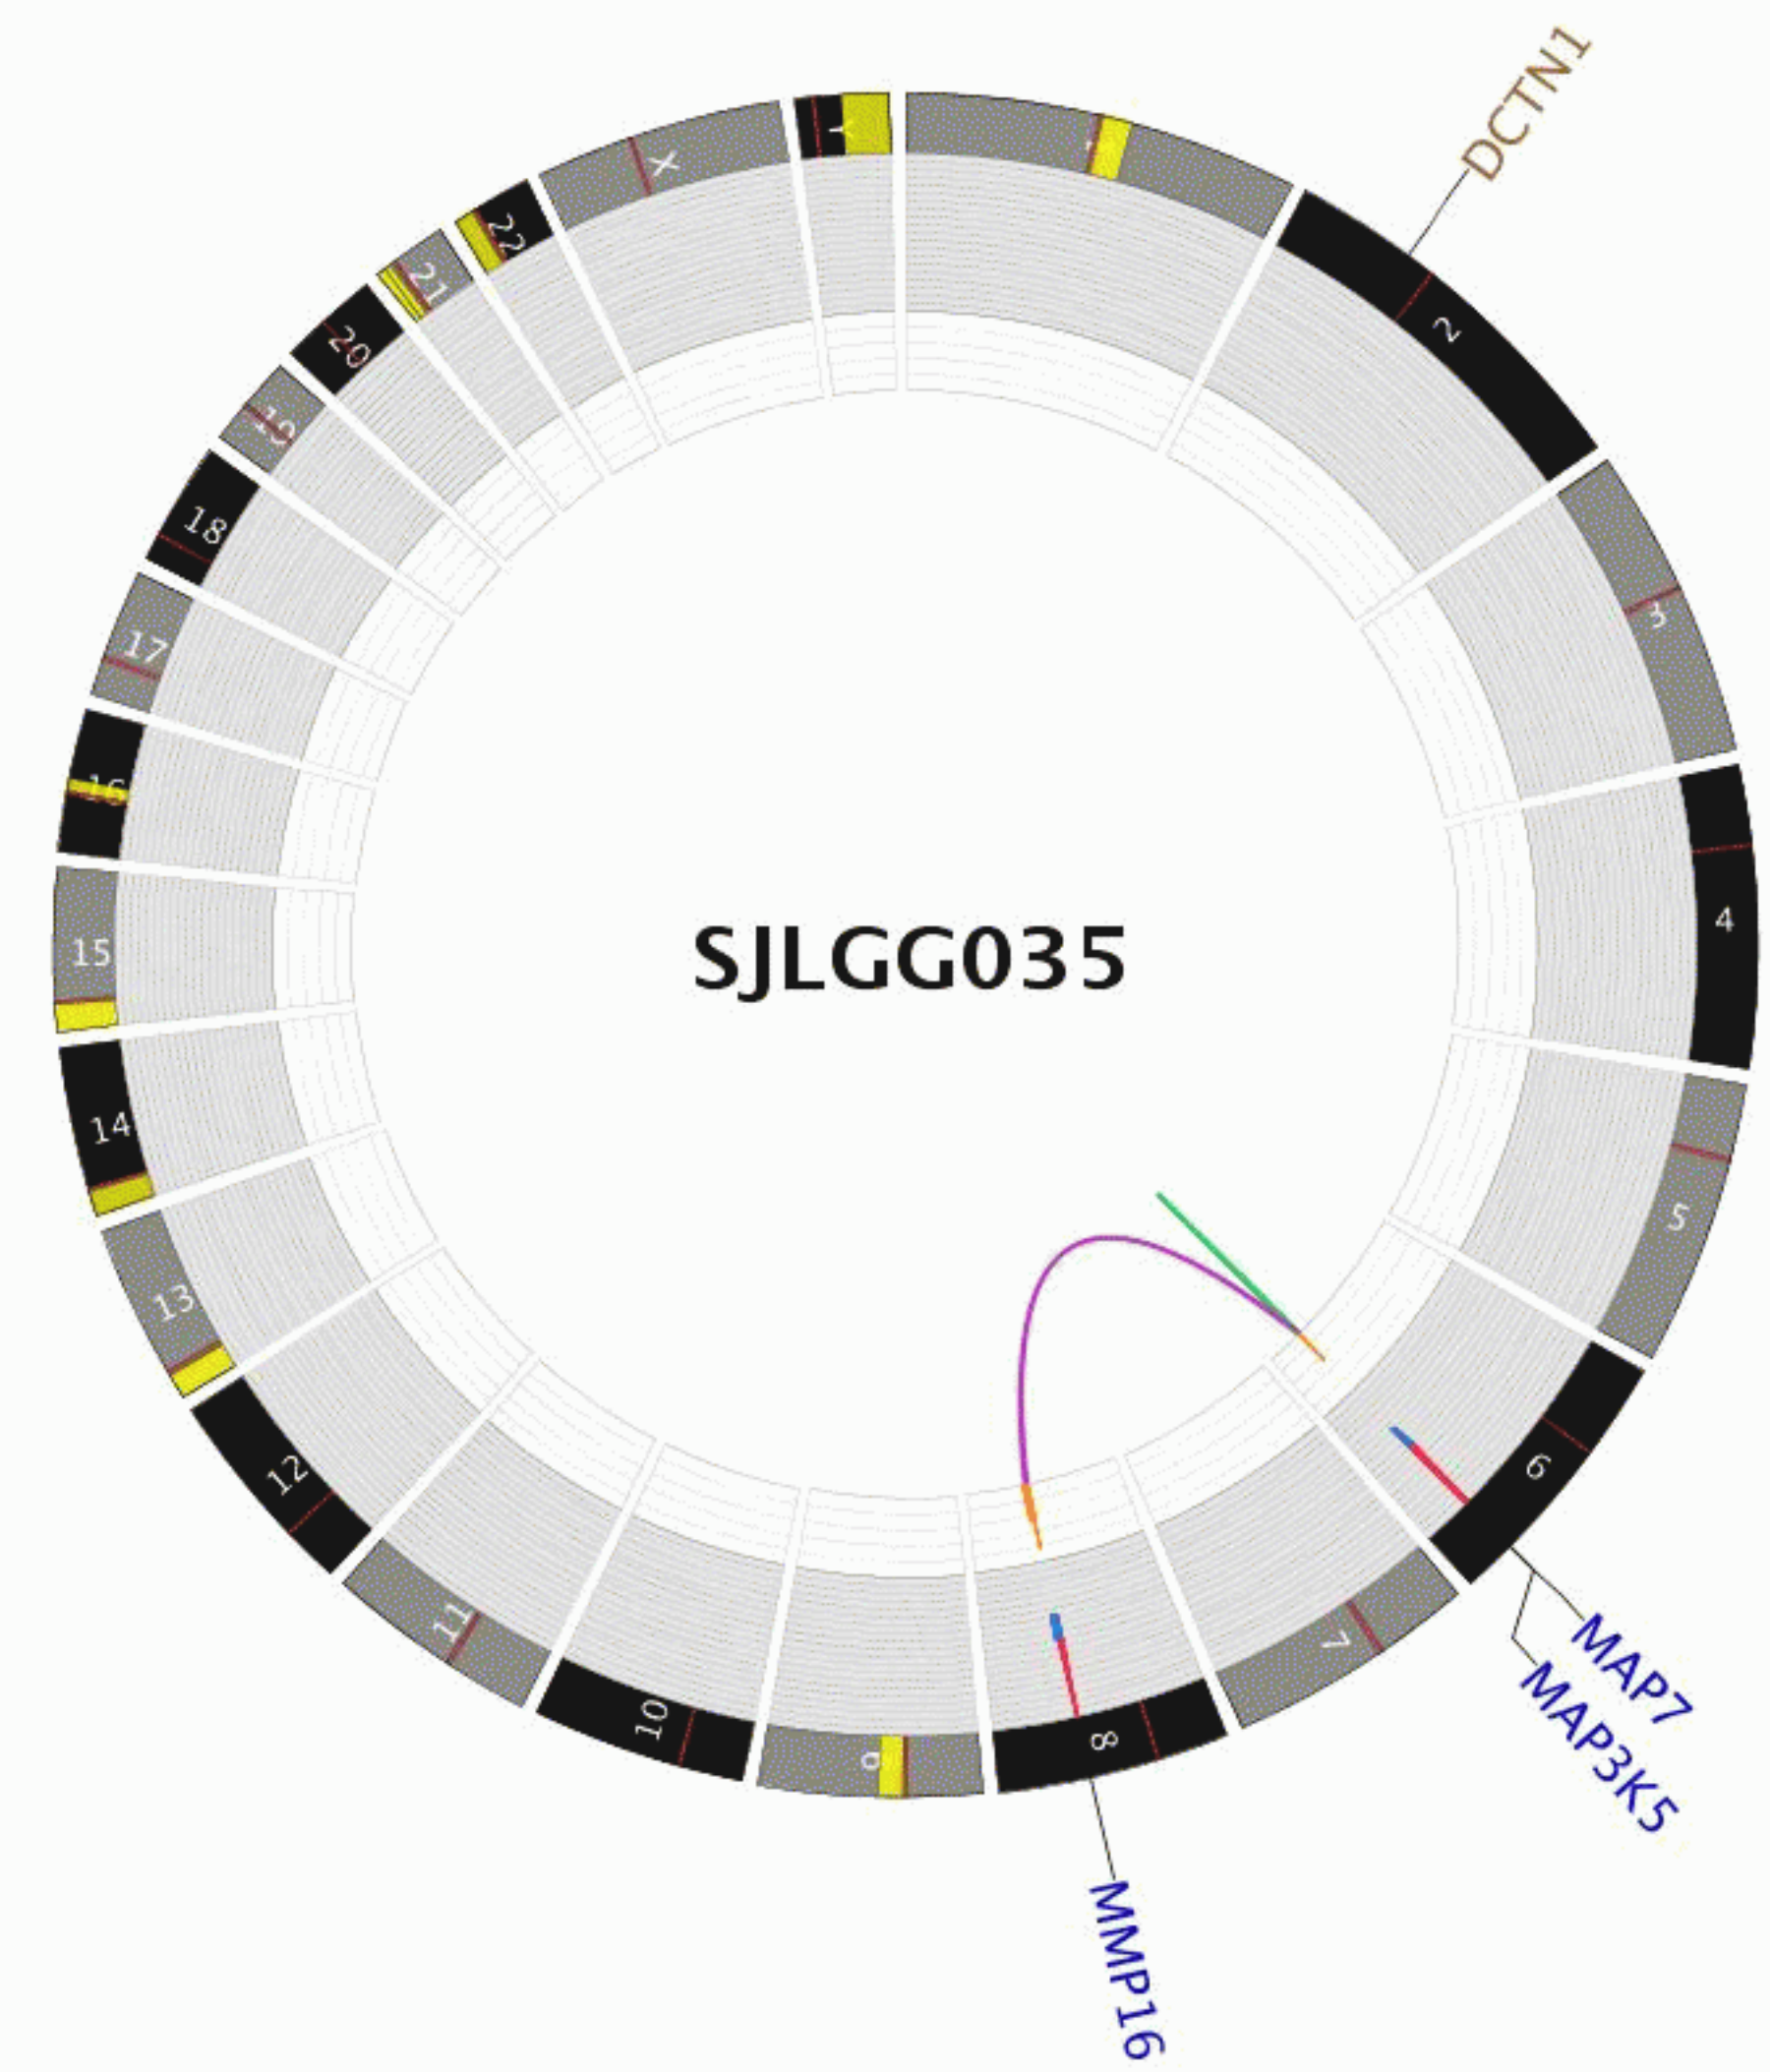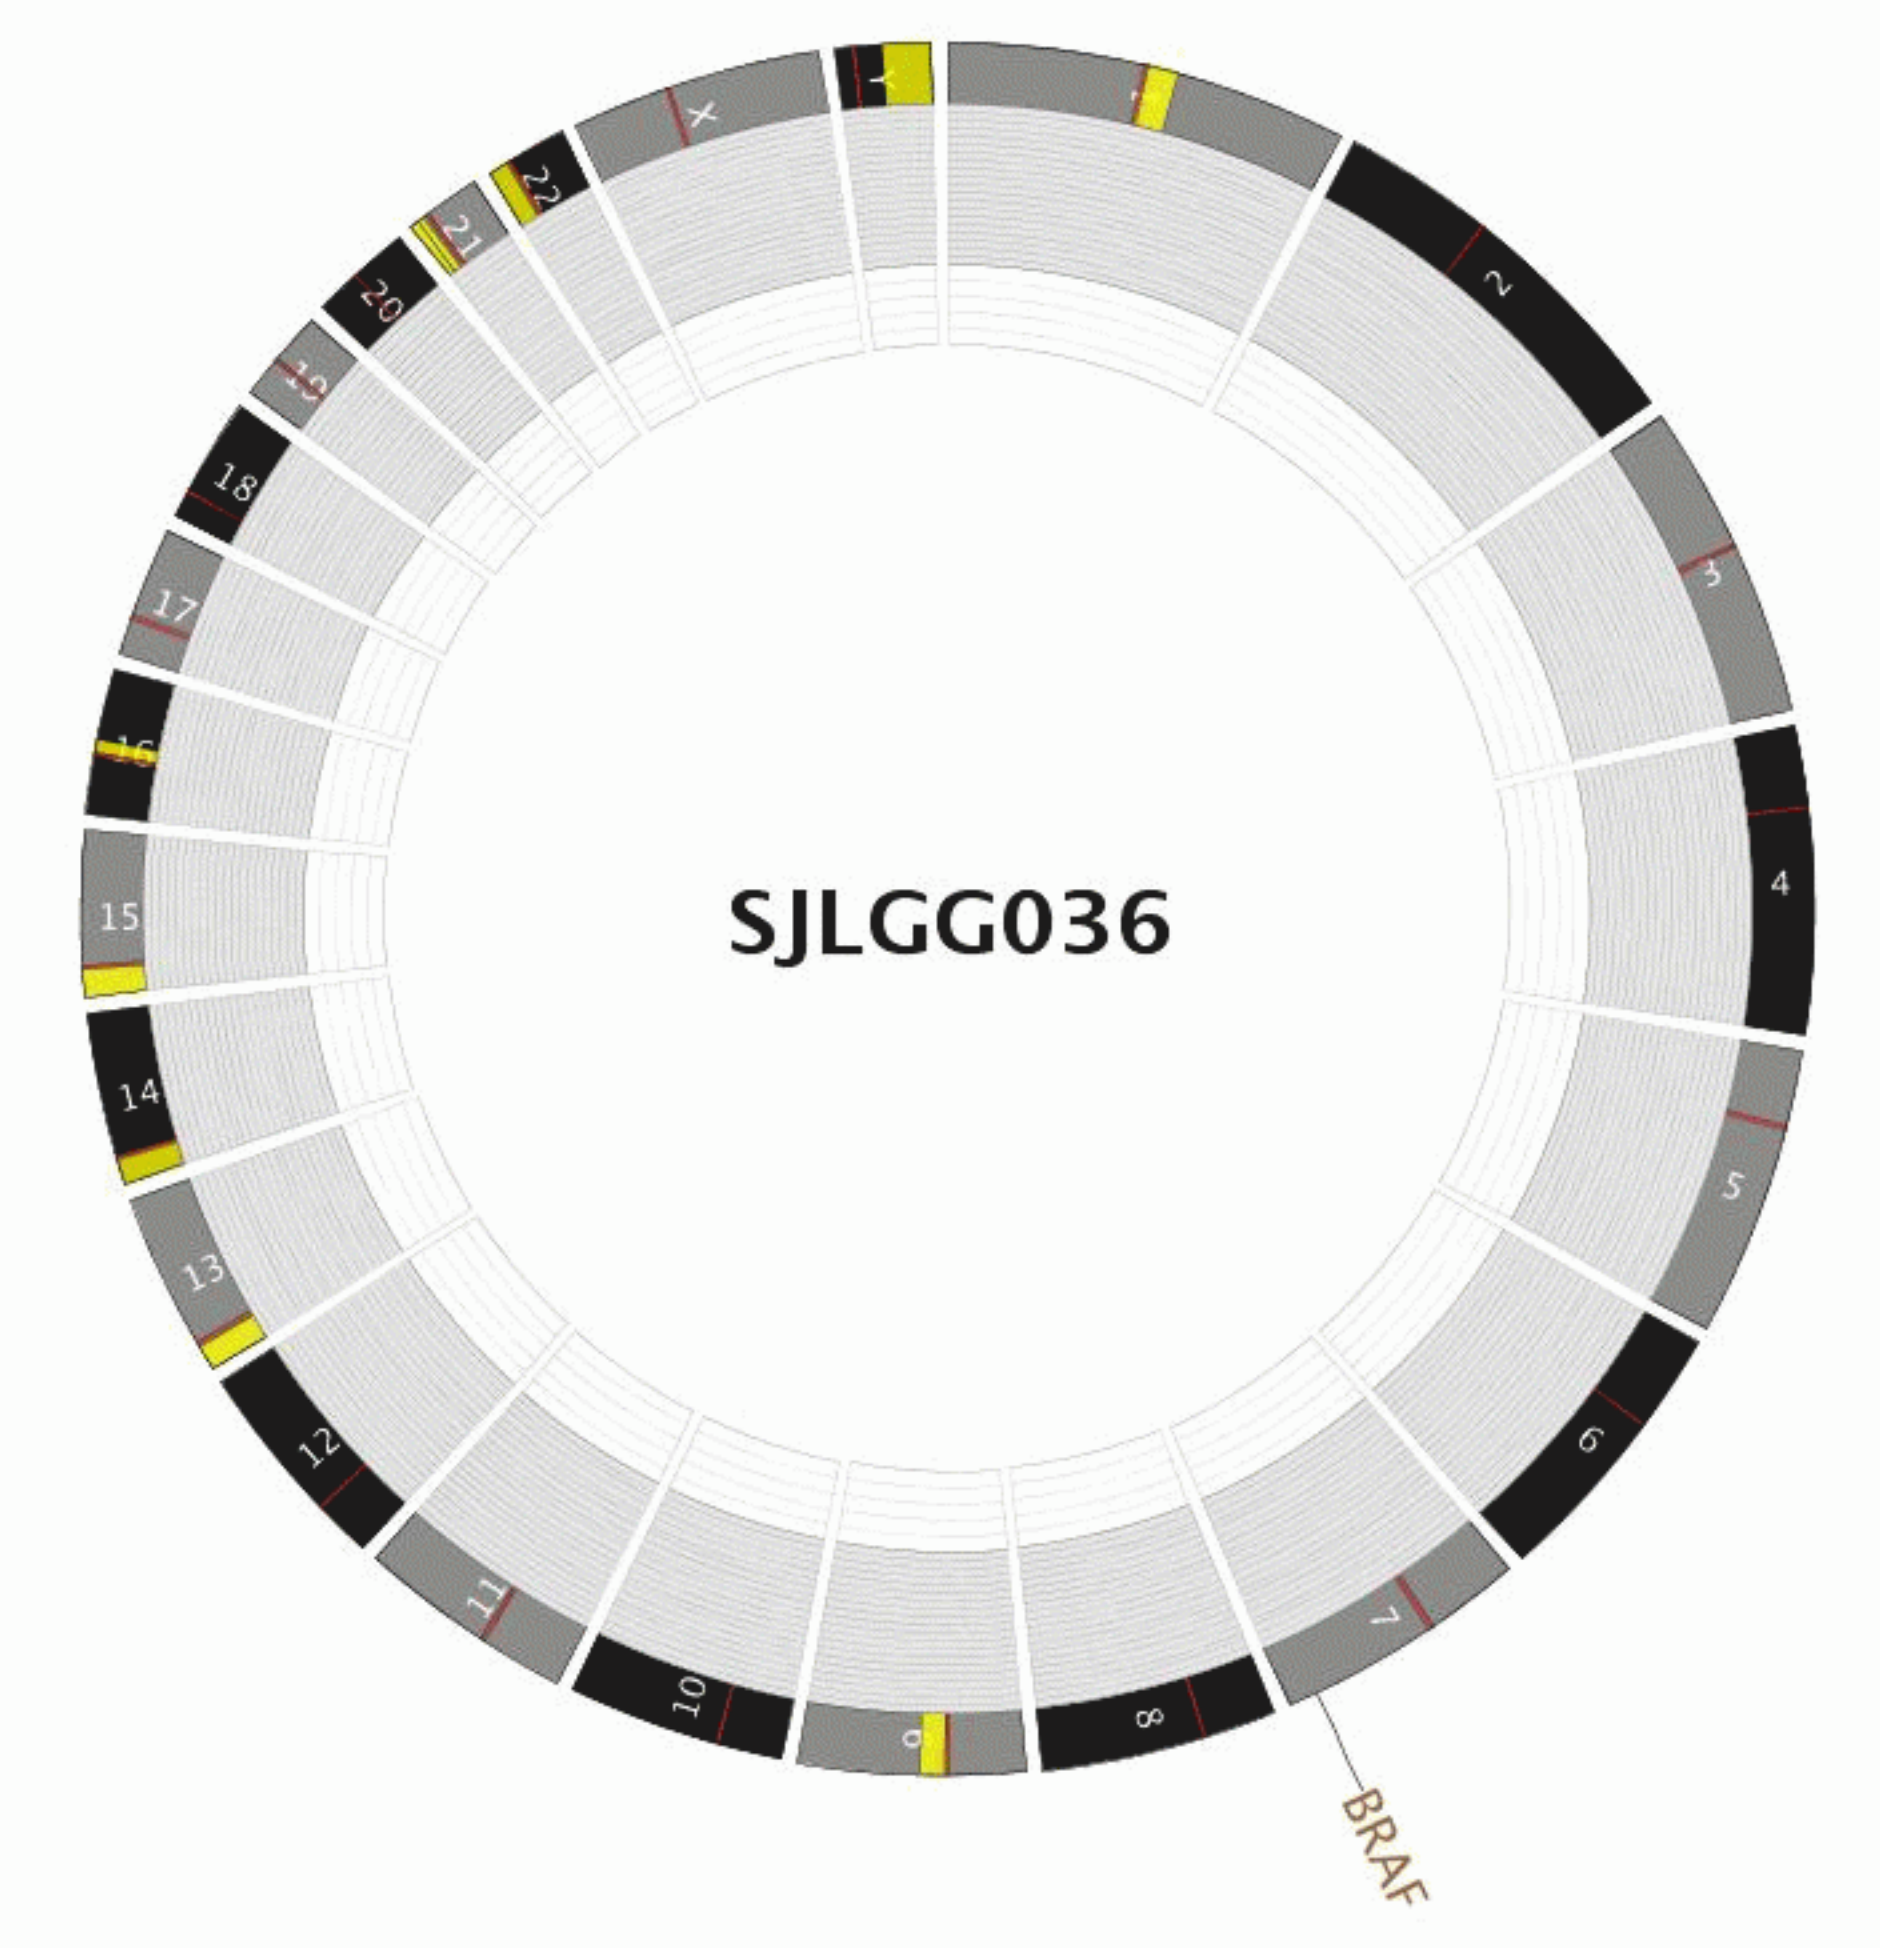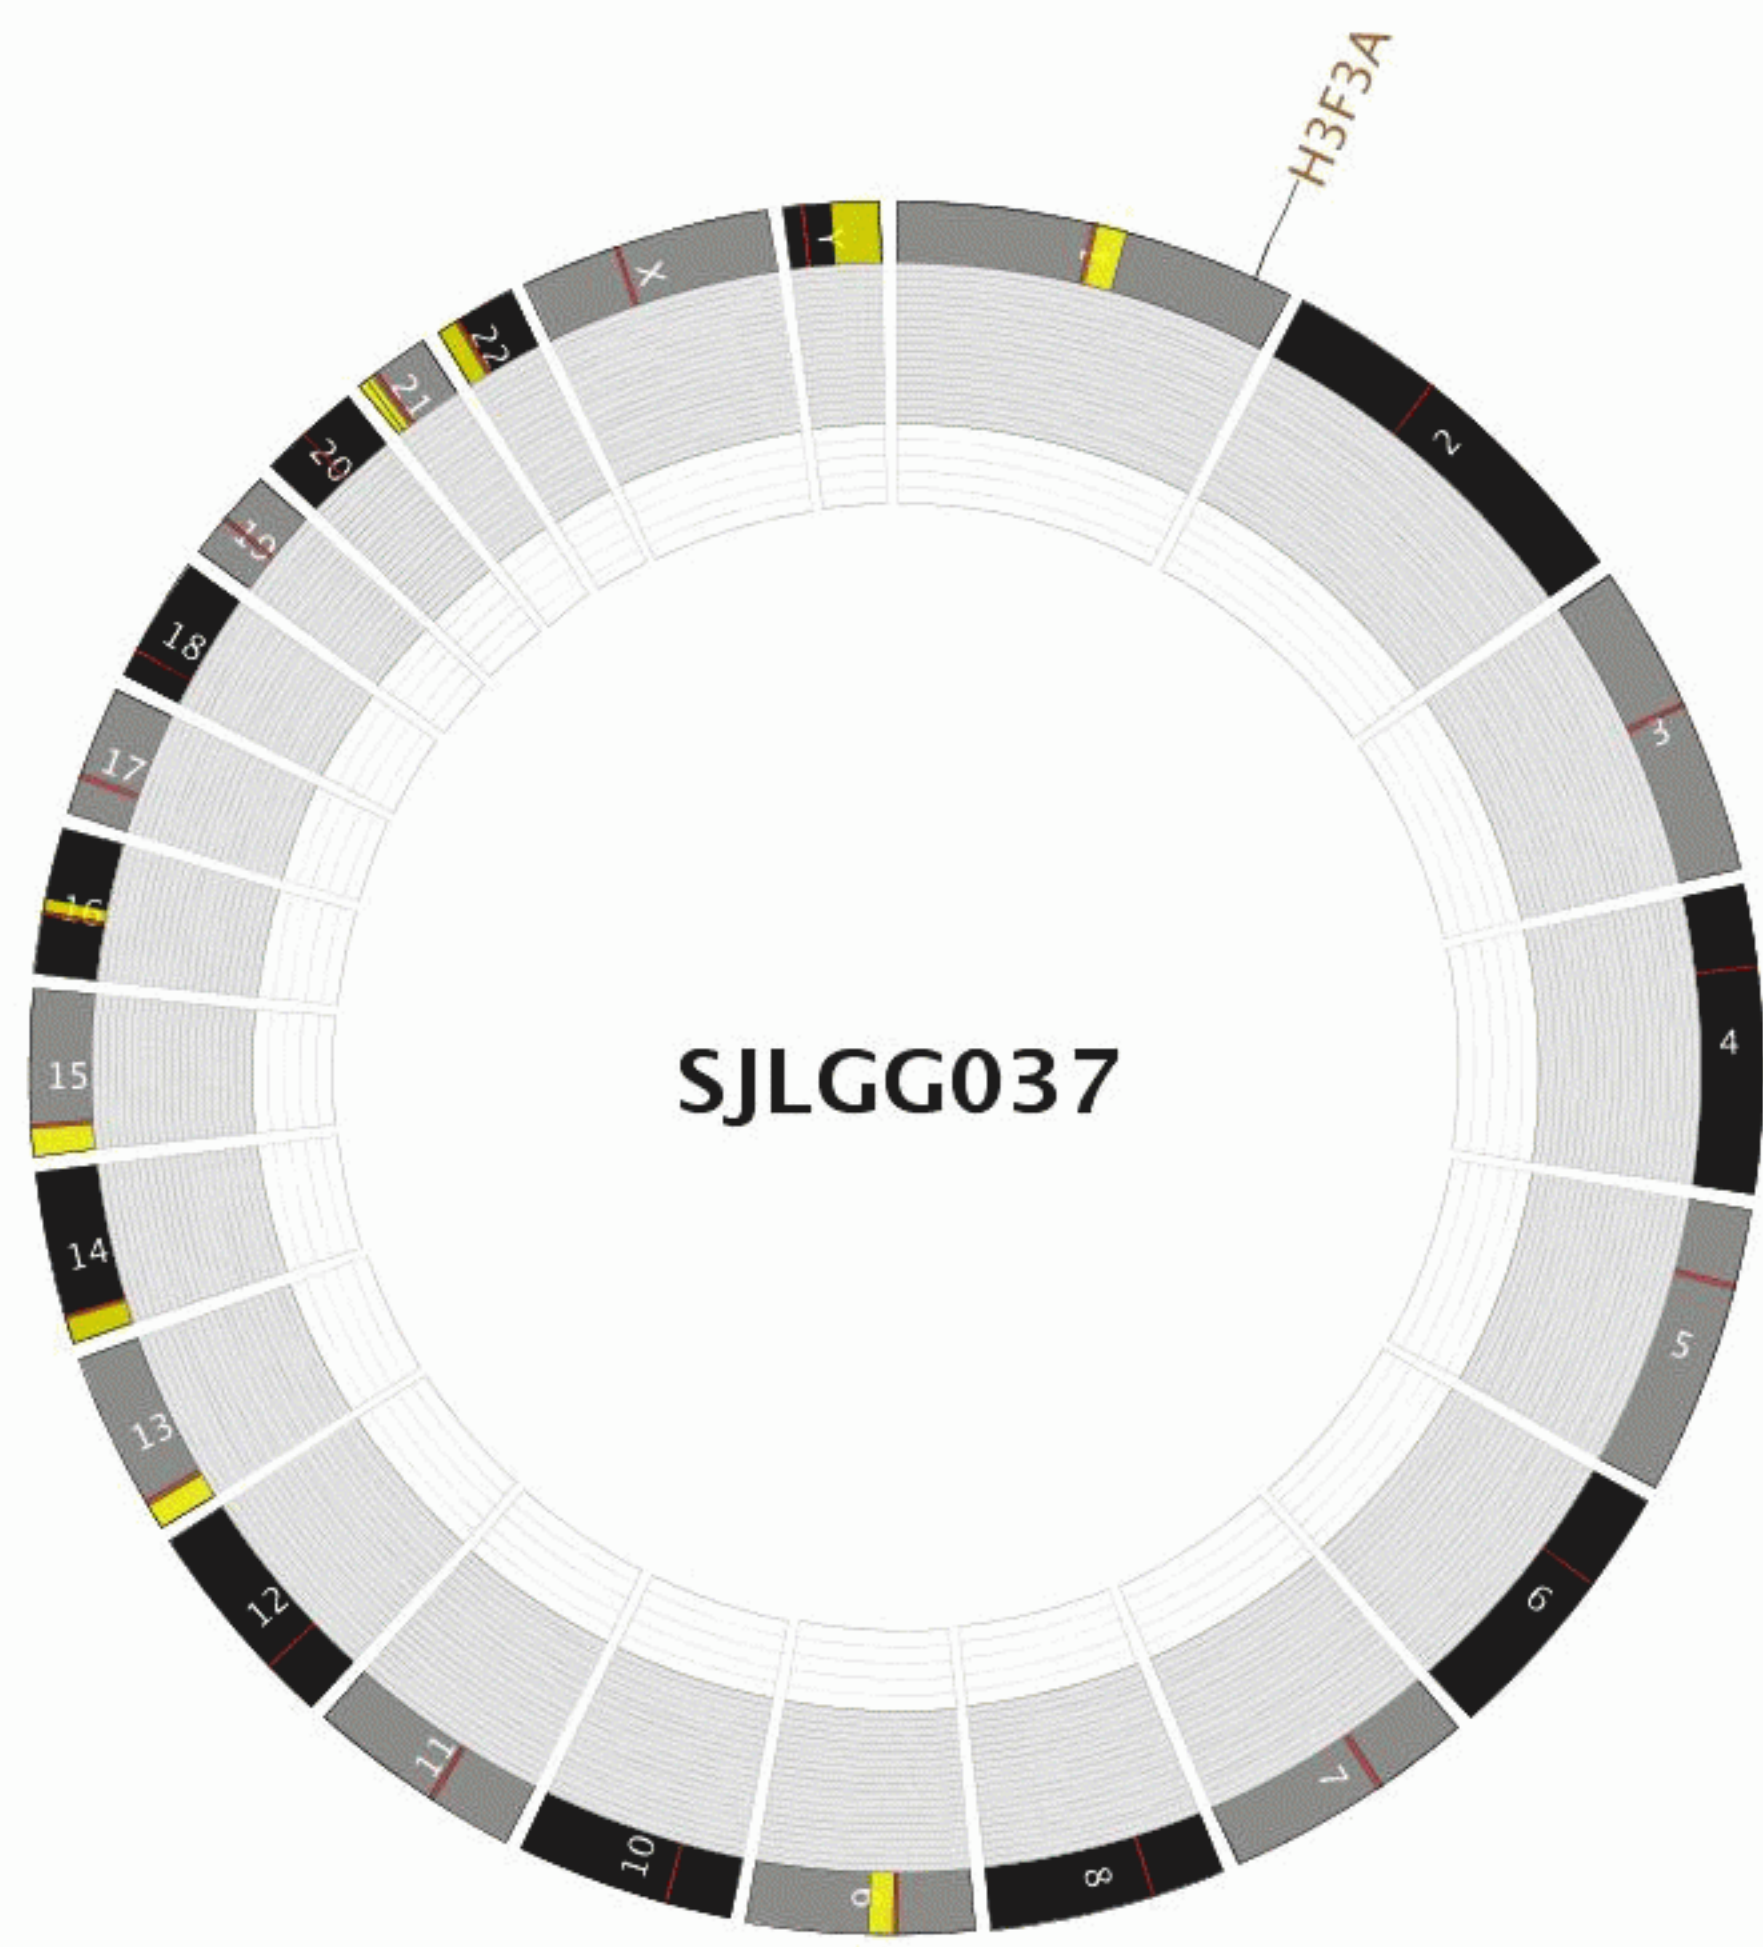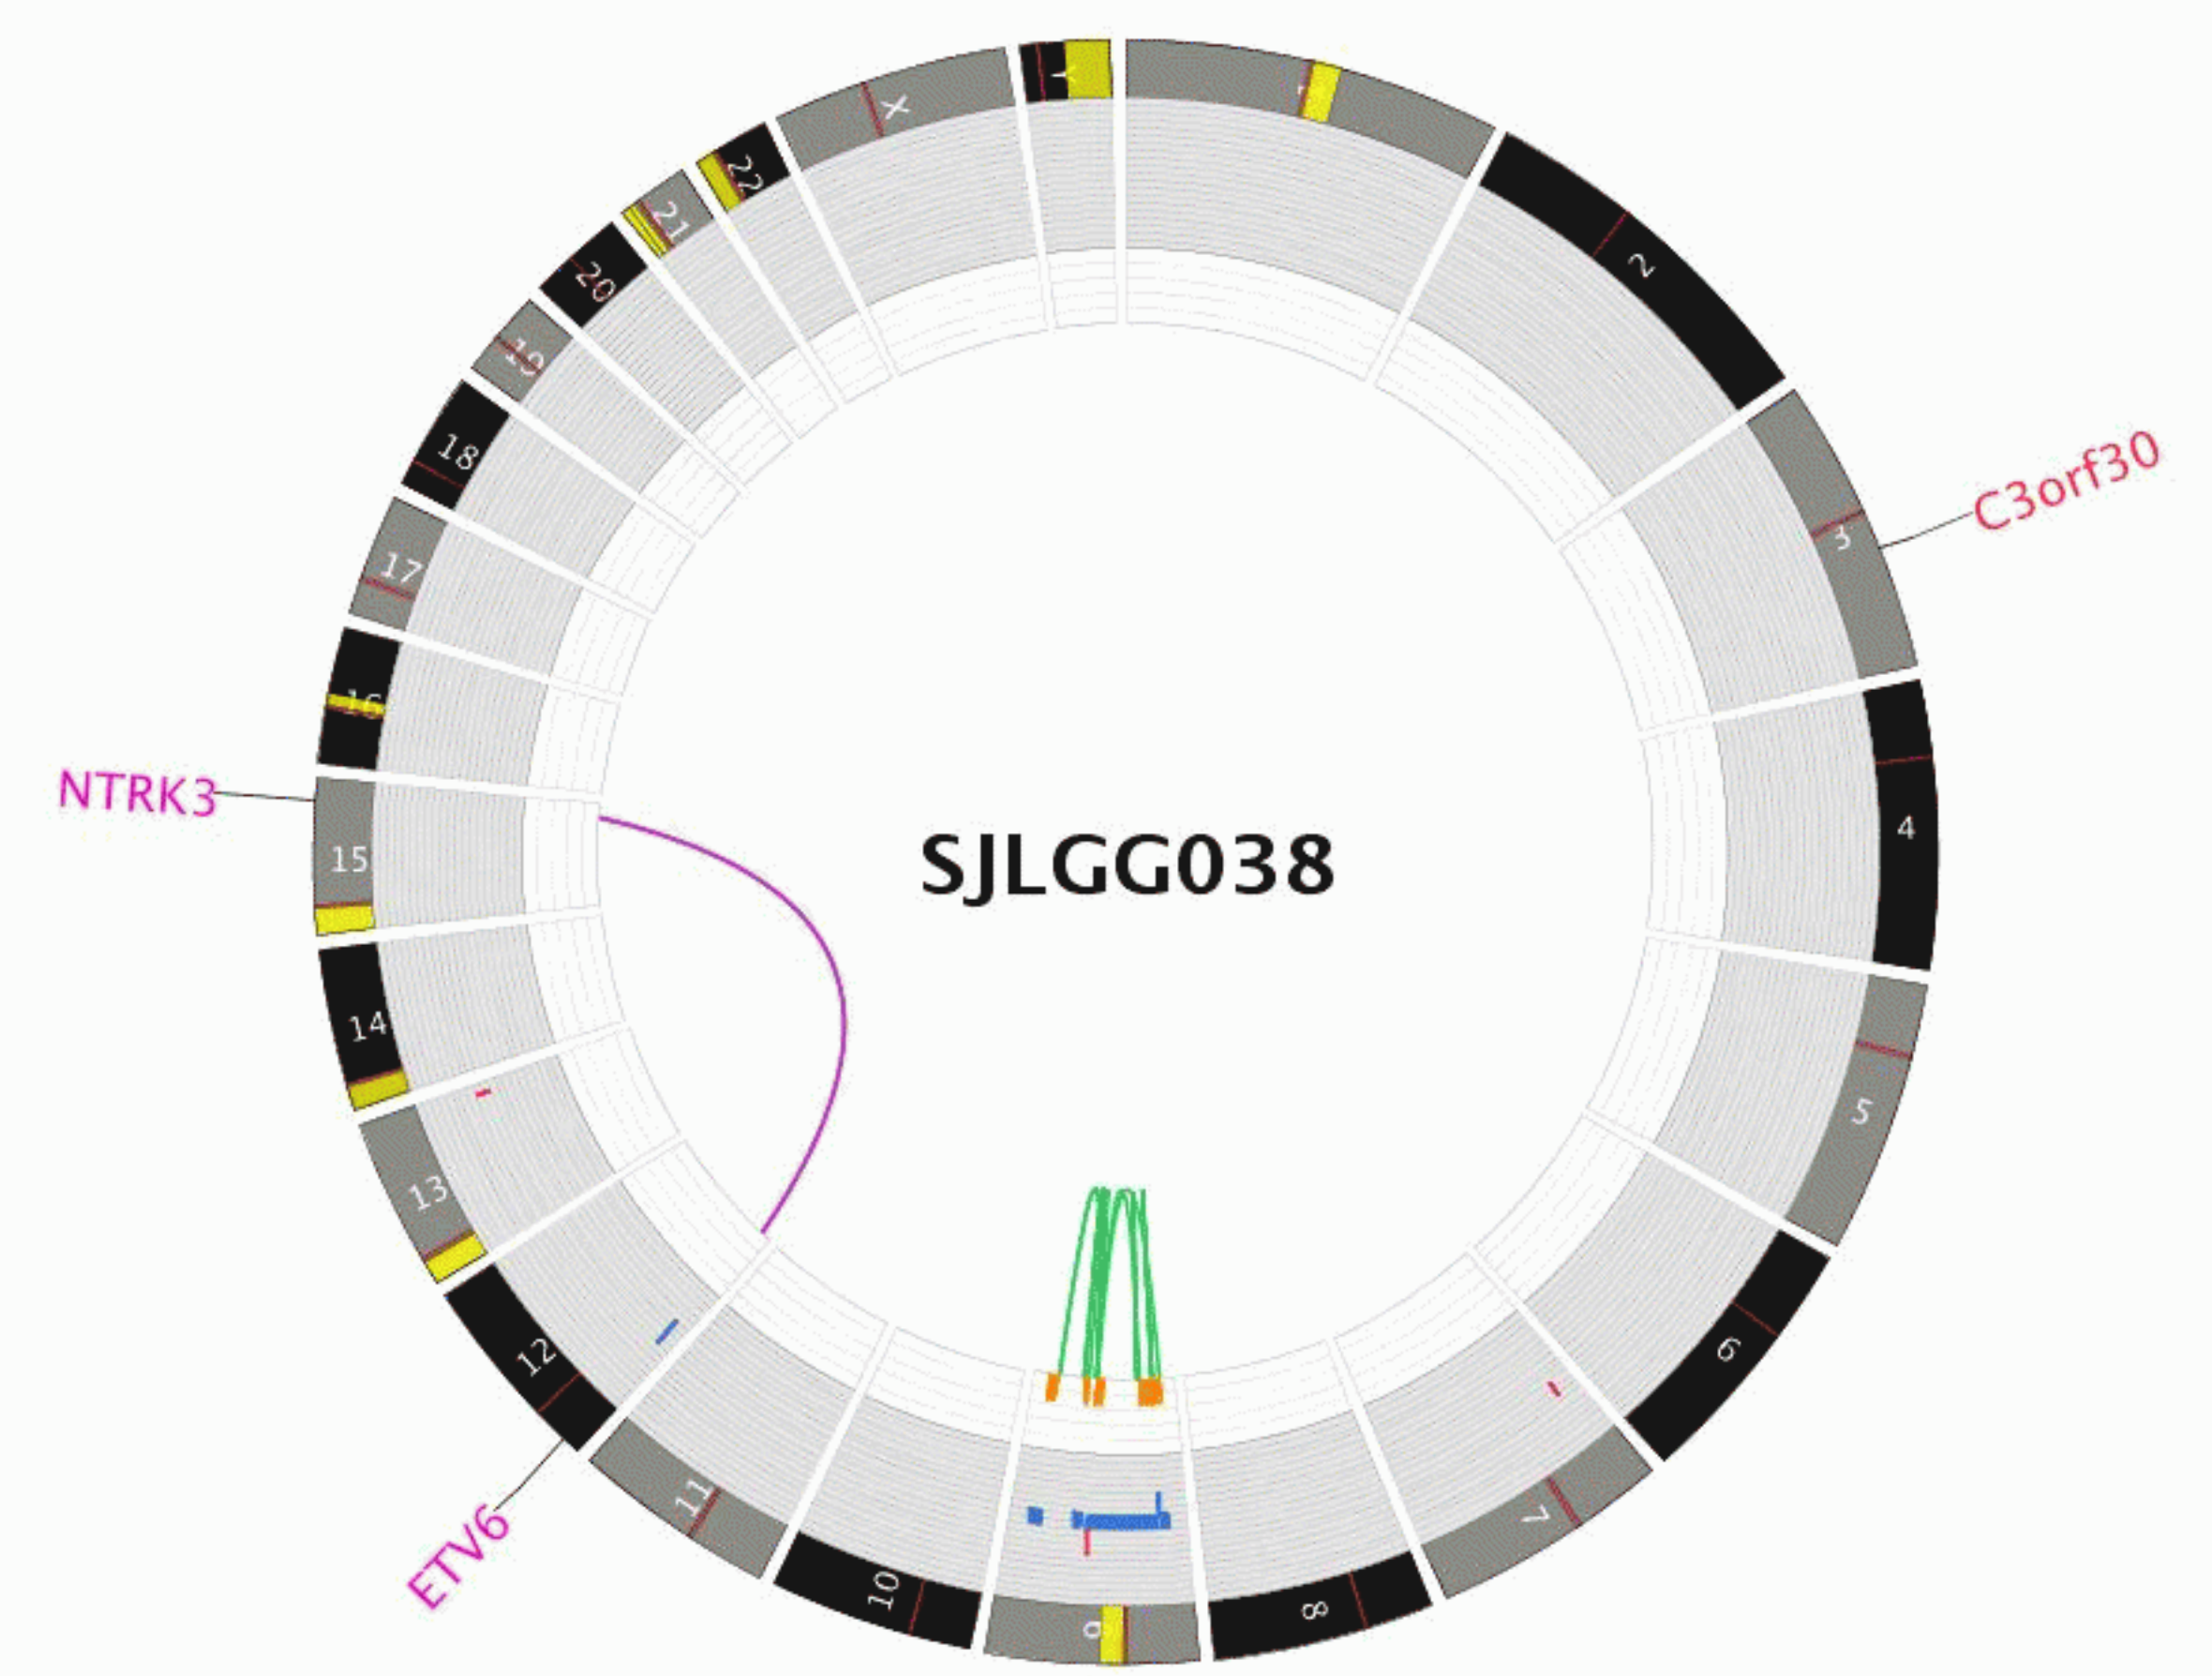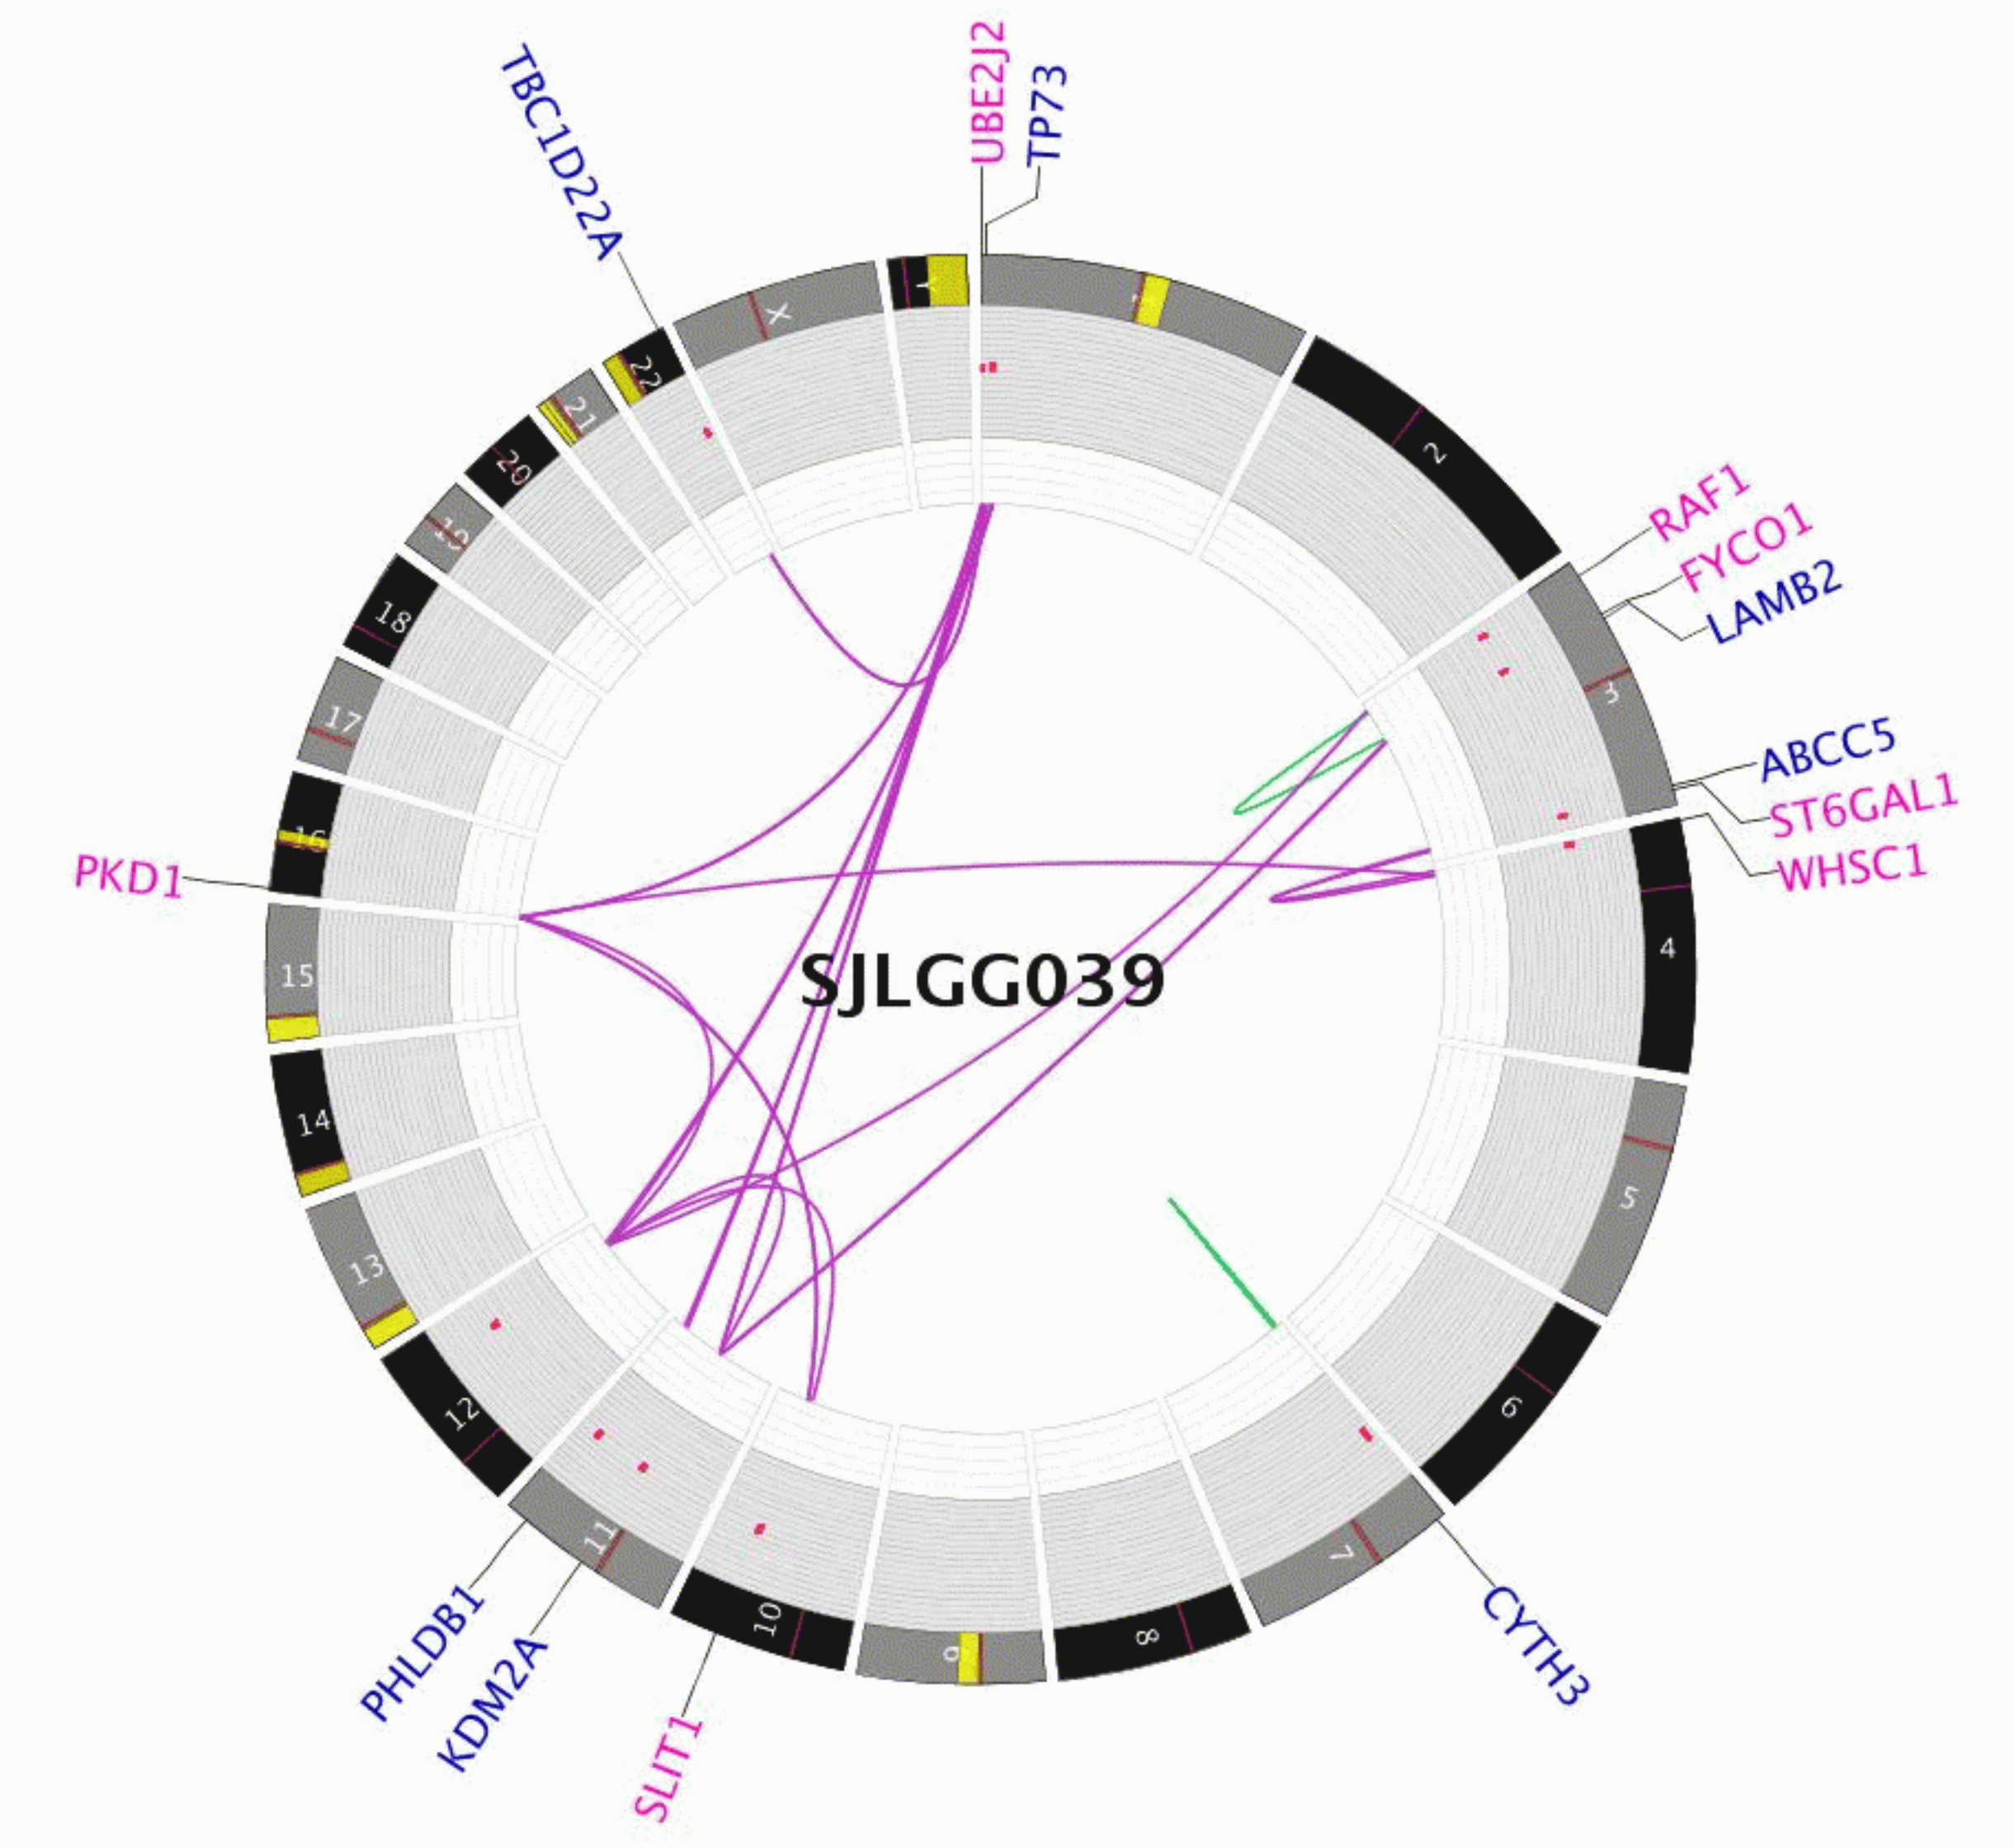



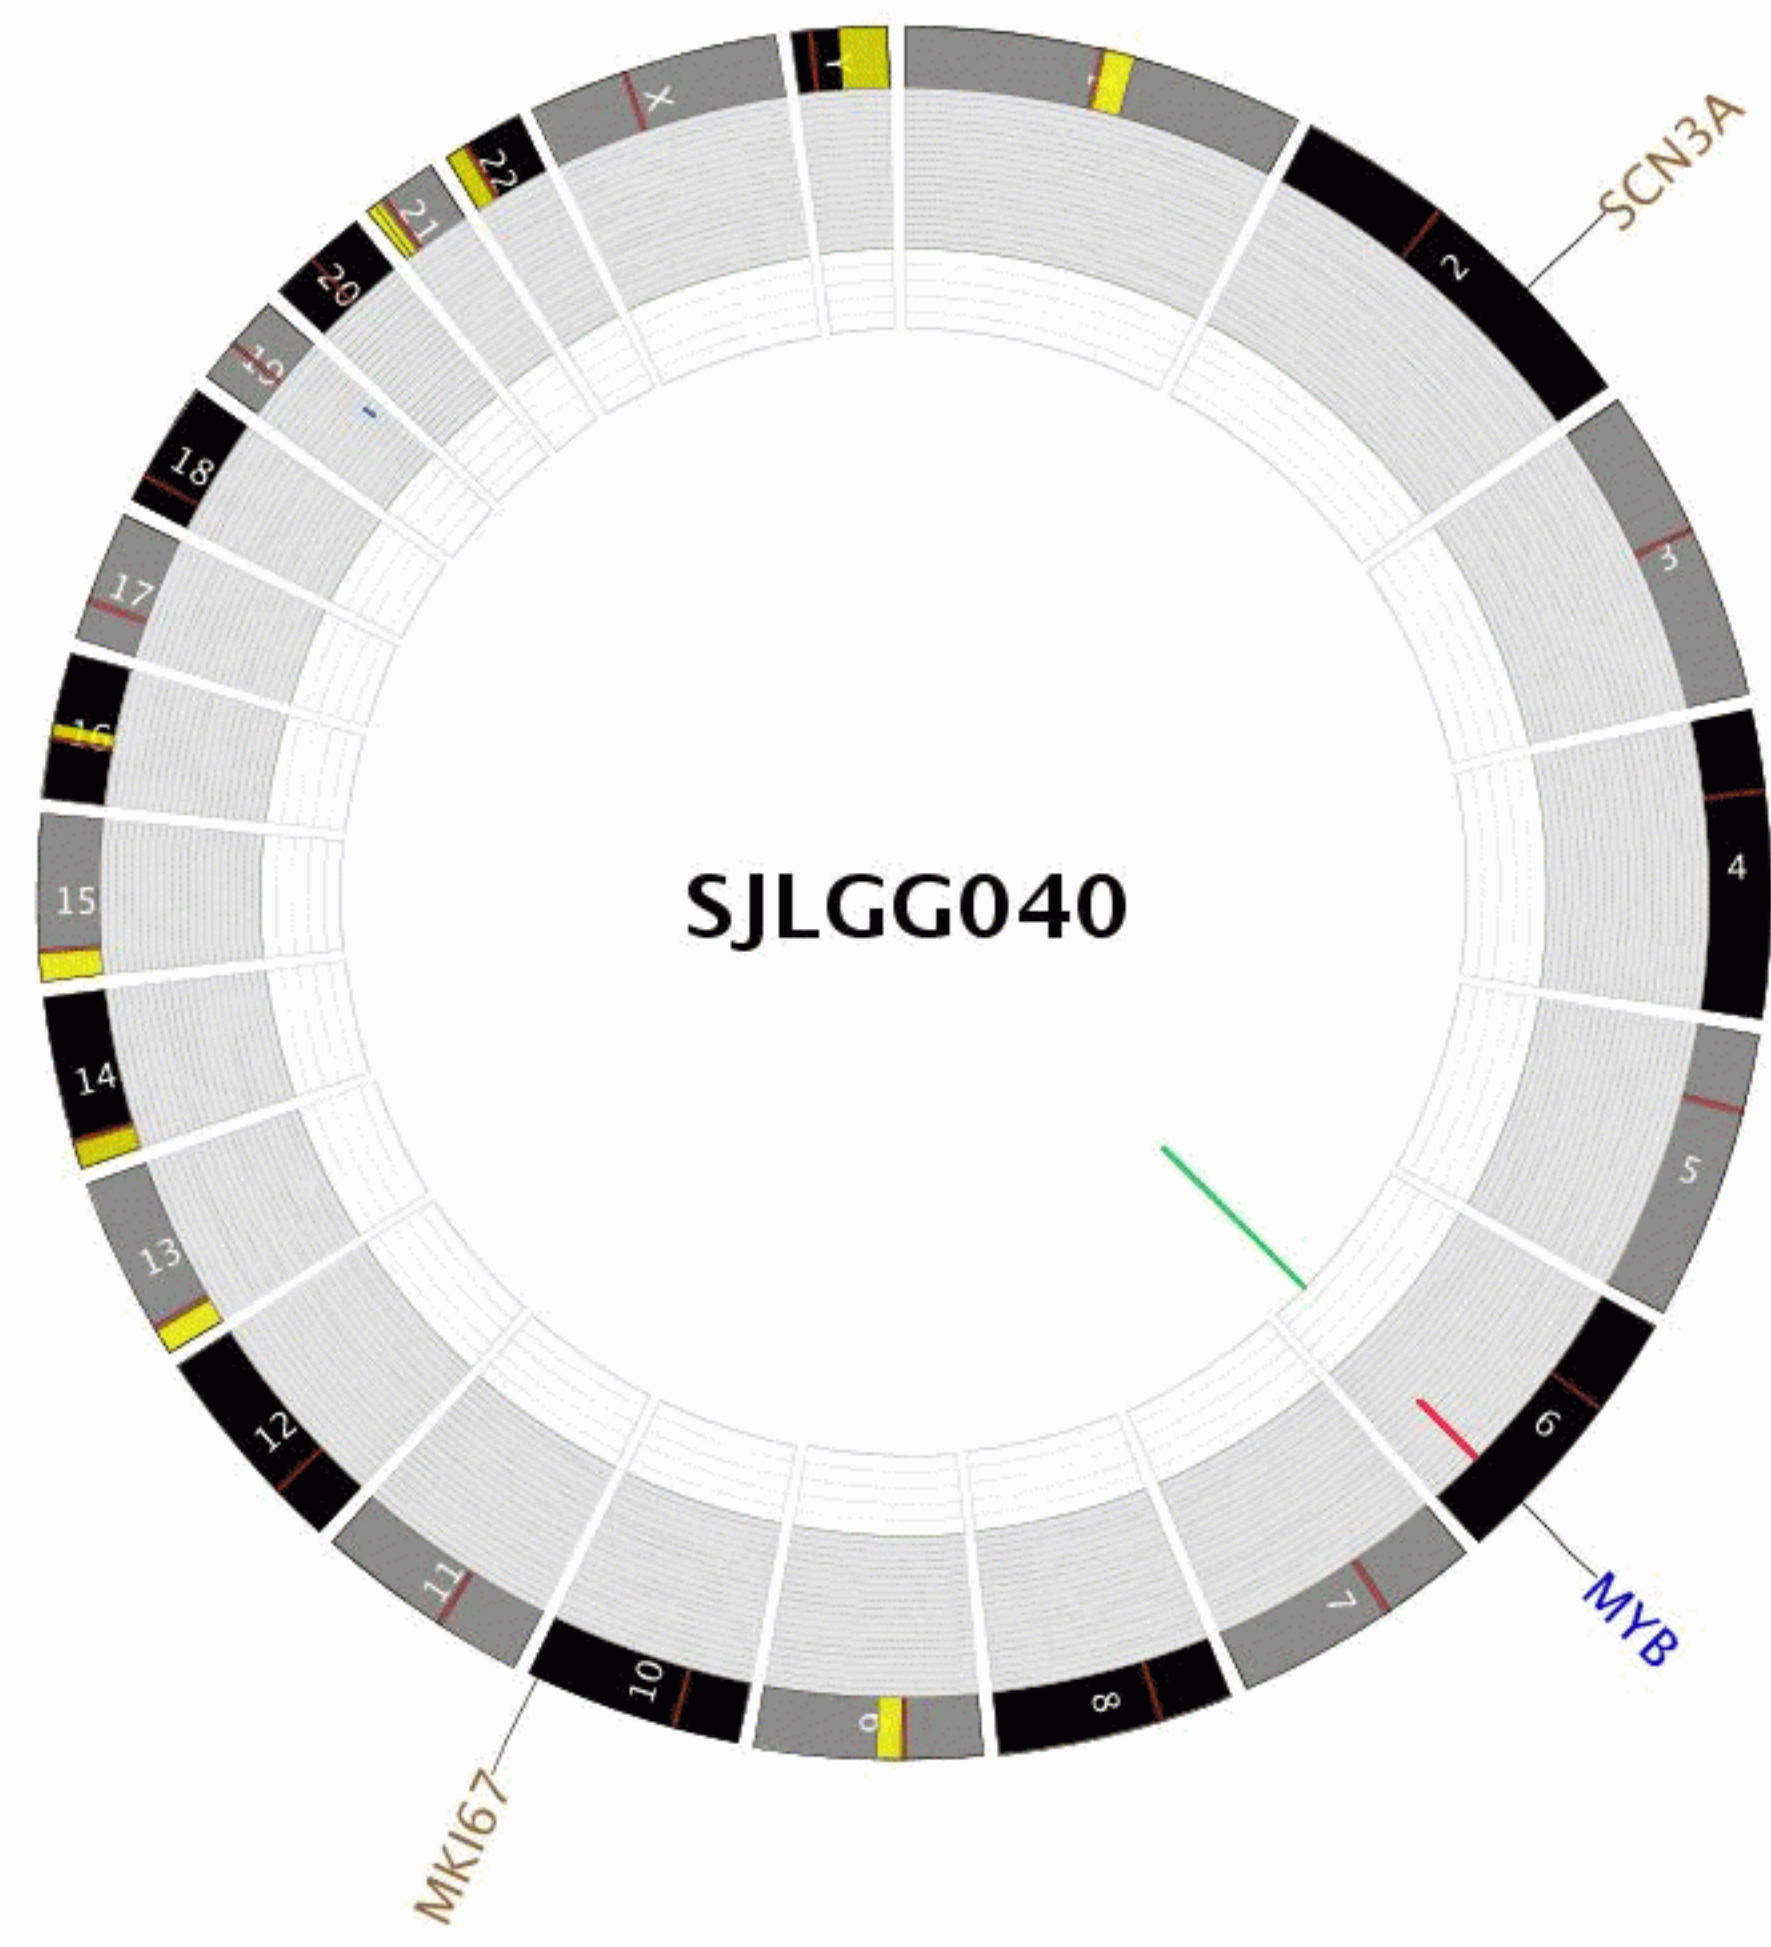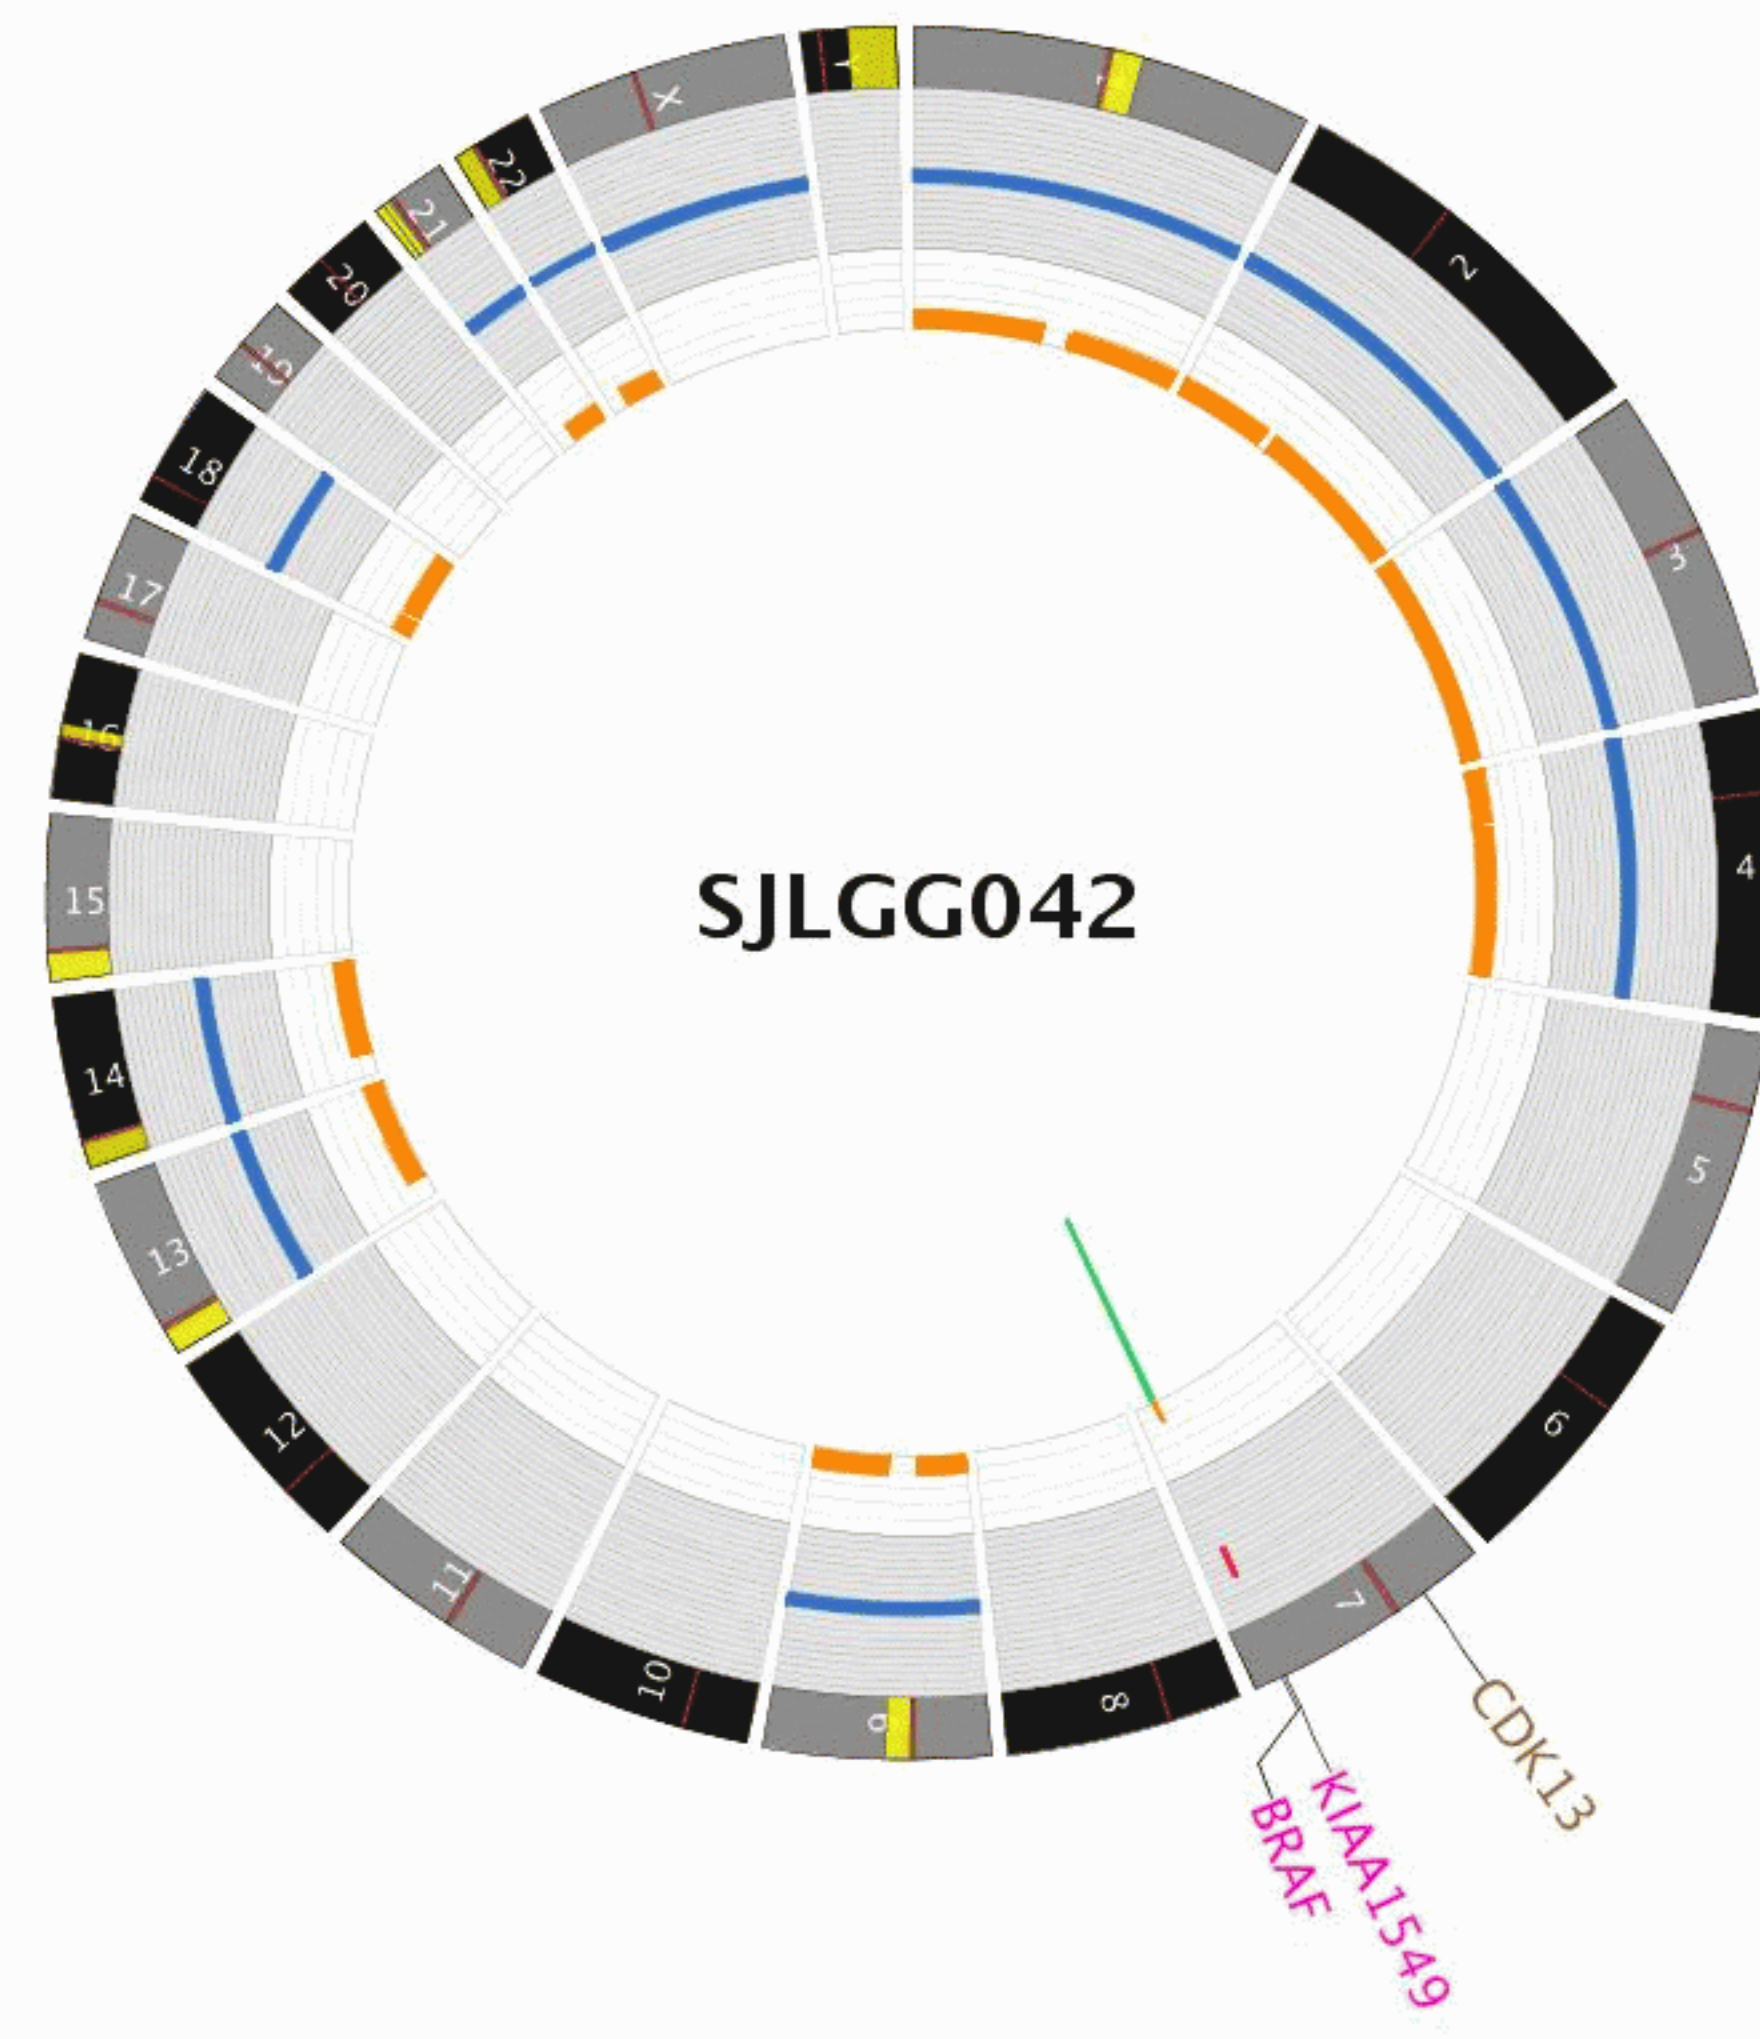

**Supplementary Figure 4. Fusion of *ST6GAL1* 5' UTR to *WHSC1* in SJLGG039**

**a.** An SV identified by WGS indicated translocation breakpoints at intron 2 of *ST6GAL1* (chr3:186716601) and intron 3 of *WHSC1* (chr4:1899271). **b.** Split reads derived from mRNA-seq at position chr4:1902353. Subsequences at left are soft-clipped reads that match the second exon of *ST6GAL1* (chr3:18661714), while subsequences at right match exon 4 of *WHSC1*. **c.** iFISH image from the tumor demonstrating an unbalanced fusion (one yellow signal) between probes to *WHSC1* (red probe) and *ST6GAL1* (green probe) amid copy number gain.

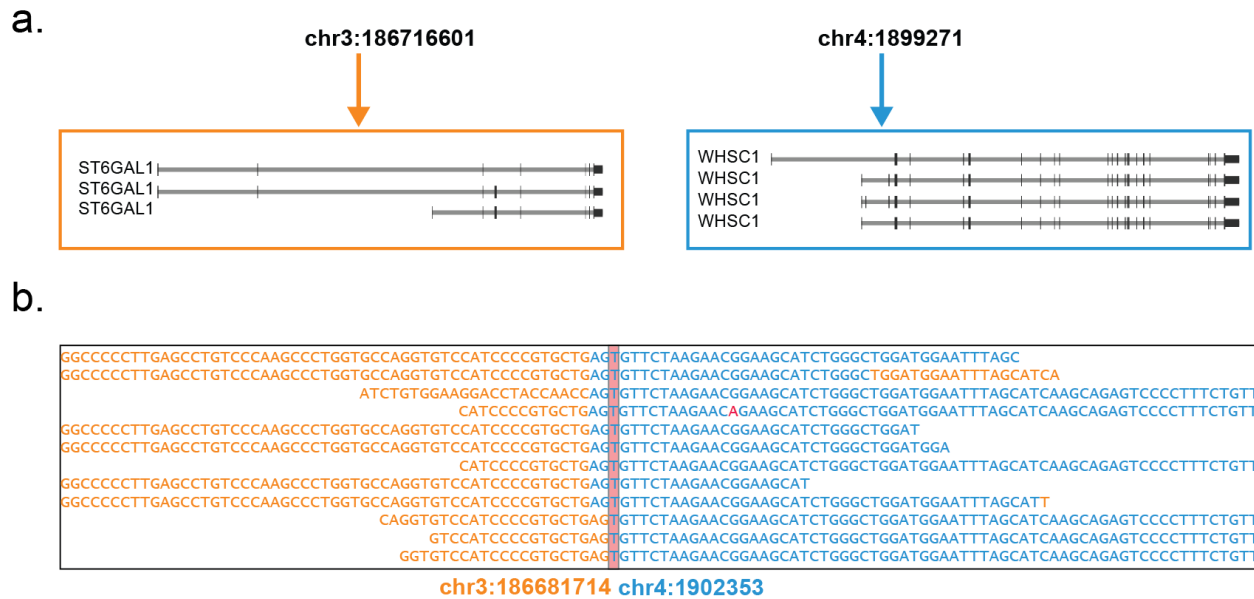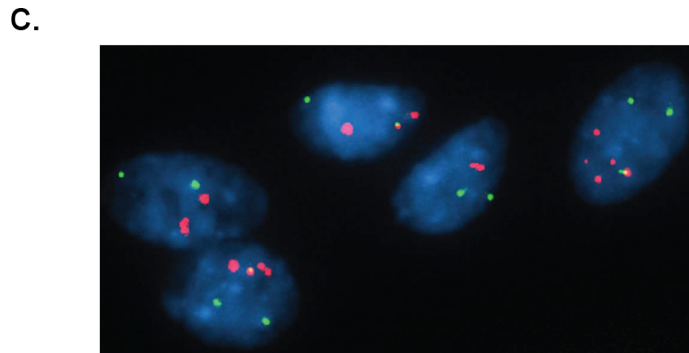

### Supplementary Figure 5. SVs and CNVs identified for SJLGG038

**a** Reciprocal translocation of chr4-chr12 resulting in two fusion proteins, ETV6-NTRK3 and NTRK3-ETV6. Another tumor, SJLGG061, contained an isolated NAV1-NTRK2 fusion (bottom).

**b** CIRCOS plot for chromosome 9 showing both CNV and SVs. All deletion segments identified by WGS were connected with SVs, except for the end point of an 8.8Mb deletion at 116Mb-125Mb. The missing SV at this site (position 125,028,999 on chromosome 9) was caused by a highly repetitive soft-clipped subsequence,

TGGAATGGAATCTTCCGGAATGGAATGGAATGGAATGGAATGGAATGGAATGGAATGA, that cannot be mapped to the reference human genome. This soft-clipped sequence can only be mapped to an unassembled genome scaffold NW\_001839627, which suggests that the SV partner at chr9:125,028,999 resides in a sequencing gap of the reference human genome. A 266kb homozygous deletion encompassing *CDKN2A*, *CDKN2B* and *MTAP* contrasts with other SVs on chromosome 9, which are inter-connected and probably arise through a complex rearrangement termed “chromothripsis”. **c** iFISH targeting *CDKN2A* (green probe) and a control locus on 9q (red probe) and demonstrating homozygous or hemizygous loss of *CDKN2A*.



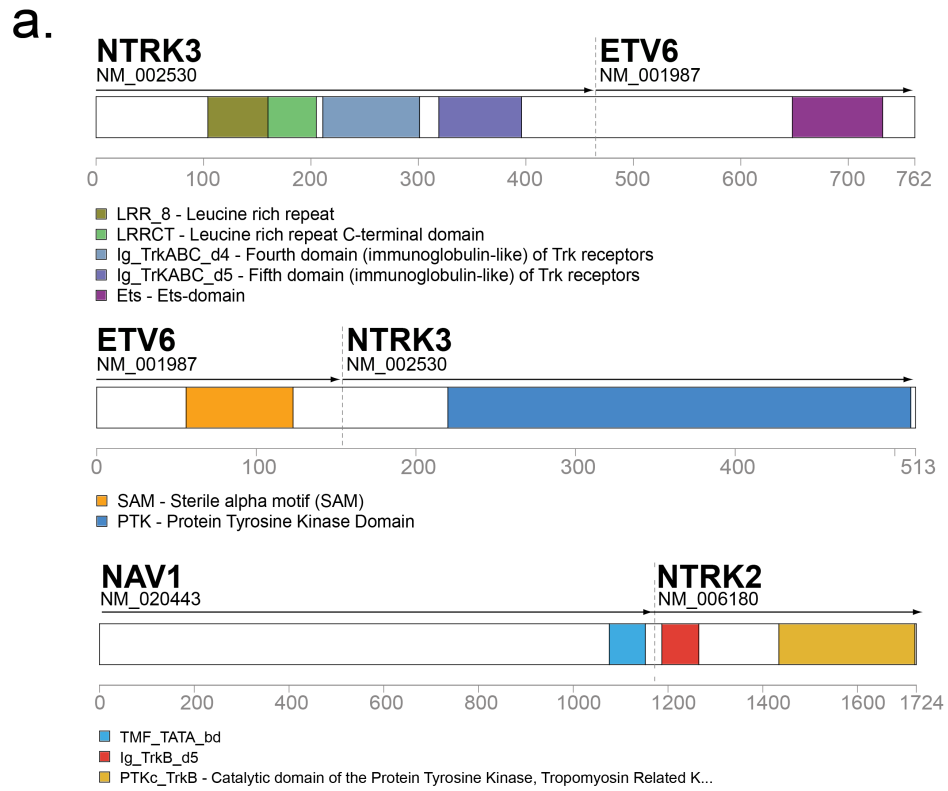

**b.**

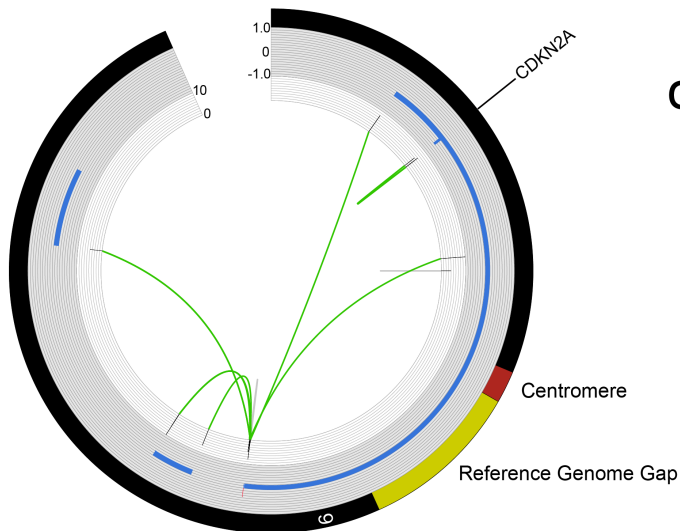

**Structural Variation**  
 —  $\geq 5$  reads supporting on either side  
 —  $< 5$  reads supporting on both sides

**Copy Number Variation**  
 ■ Gain  
 ■ Loss

**c.**

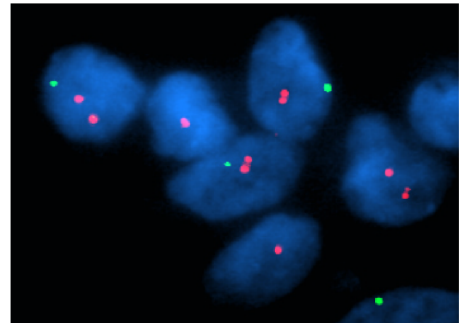

**Supplementary Figure 6. Complex rearrangement involving 5 SVs and 4 genomic segments and spanning a 21.5Mb region on chromosome 8 in SJLGG033**

**a.** Genomic locations of altered chromosomal structure and SV breakpoints involved by the rearrangement, which shows a pattern of 'closed chain' chromosomal breakage and rejoining with no concomitant copy number alteration. The coding regions of *MYBL1*, *C8orf34* and *SNX16* were disrupted. *C8orf34* is not expressed, but abnormal expression of *MYBL1* and *SNX16* was confirmed by mRNA-seq and RT-PCR of cDNA. WGS predicted that the last 7 exons of *MYBL1* are split from the 5' end of the *MYBL1* transcript in this rearrangement. Differential expression and break apart of the 5' and 3' regions of *MYBL1* were confirmed by RT-PCR and iFISH, respectively. **b.** Coverage graph of mRNA-seq data showing that SJLGG033 has abnormal expression of *MYBL1*, when compared to a control sample (SJLGG034) without *MYBL1* rearrangement; at left, the last 7 exons of *MYBL1* have reduced expression compared with the 5' end of the gene, while at right abnormal transcription in a non-genic region initiated from the 'partner' breakpoint for *MYBL1* rearrangement. **c.** *MYBL1* iFISH using 'break-apart' probes; fused probes (yellow) indicate an intact *MYBL1* gene, while separated green and red probes indicate rearrangement of the 5' and 3' regions of *MYBL1*.

a.

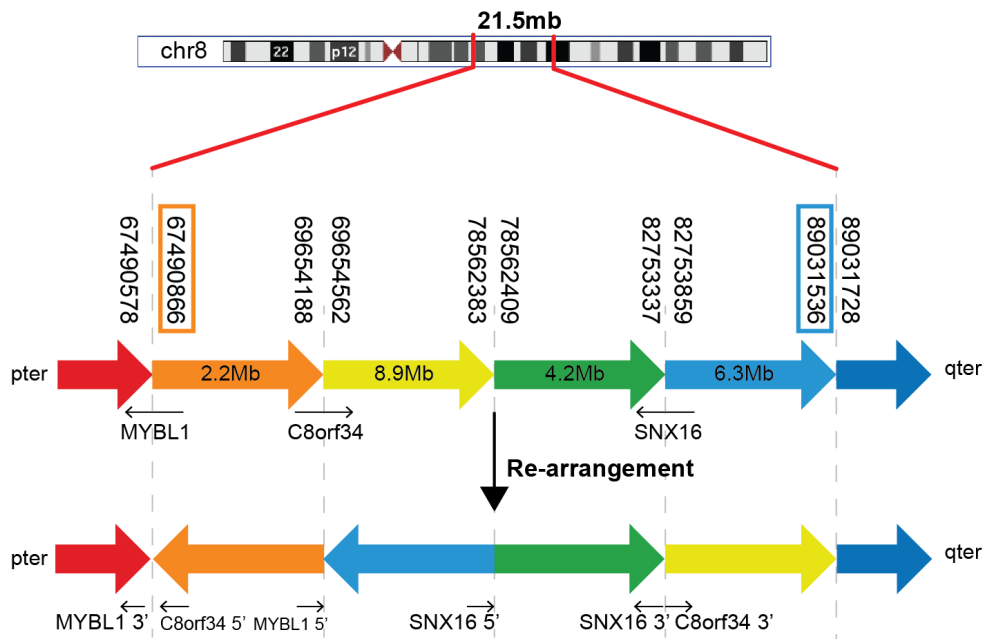

b.

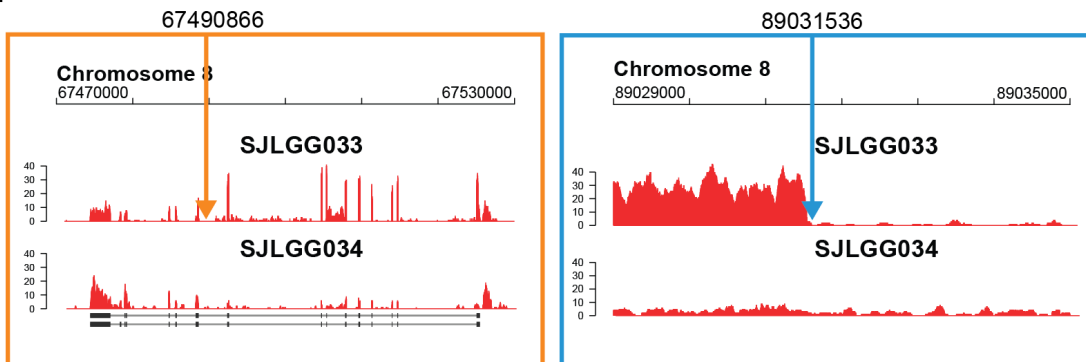

c.

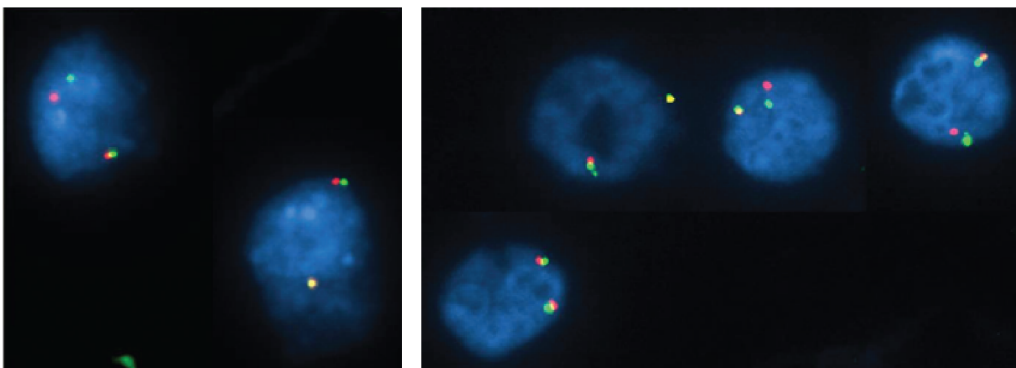



**Supplementary Figure 7. Complex rearrangement resulting in formation of a *MYB* episome in SJLGG035**

Four SVs have formed a 1.1Mb episome, consisting of two segments on chromosome 6 and one on chromosome 8 and resulting in loss of a 1.4Mb region between the two chromosome 6 segments. All three segments show >10x amplification, suggesting that replication of the episome occurs after rearrangement. One segment on chromosome 6 (chr6:135495476-135540965) contains the *MYB* oncogene, which is likely to be the target gene. The segment ends 654bp downstream of the *MYB* 3' UTR. **a.** Read-depth of chromosome 6 and chromosome 8 regions connected by SVs. **b.** Orientation of elements from chromosomes 6 and 8 that will form the episome by inter-chromosomal rearrangement (**c.**). **d.** iFISH verification of predicted episome replication to cause amplification; multiple signals are seen with a (red) *MYB* probe versus a green (copy number control) chromosome 6p probe.

a.

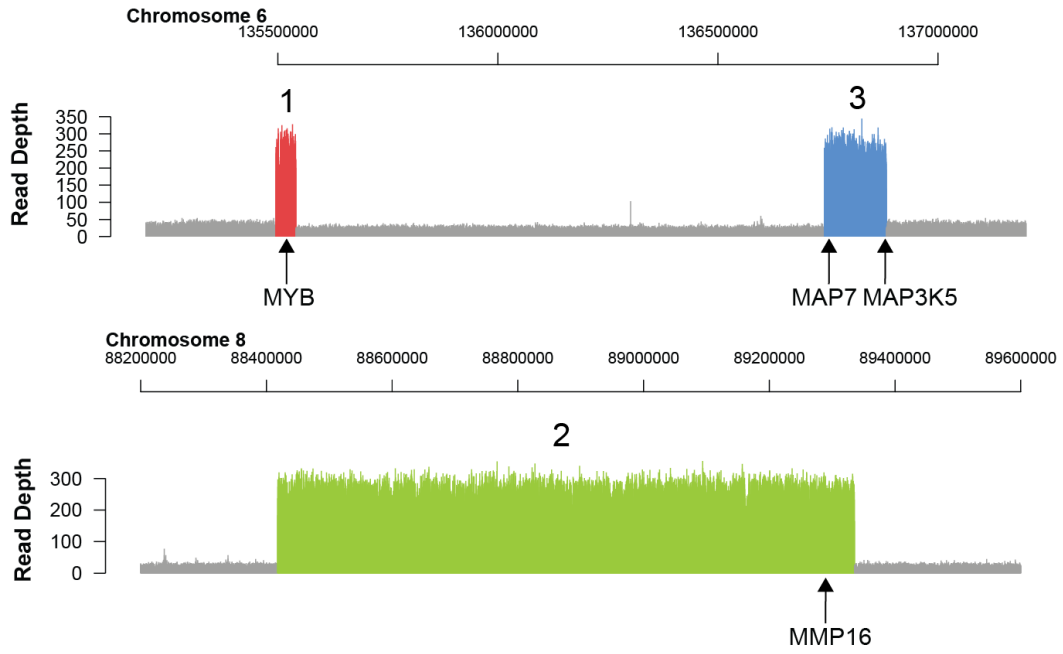

b.

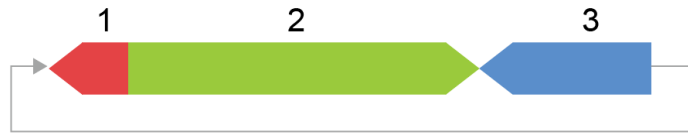

c.

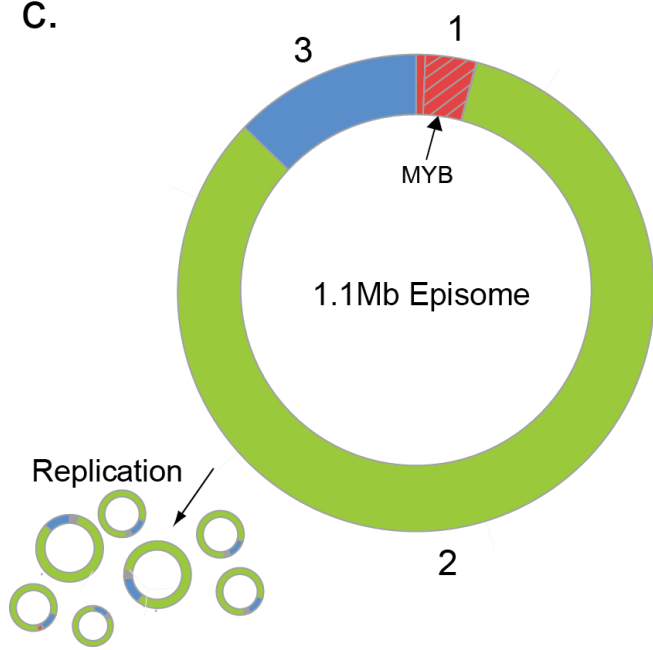

d.

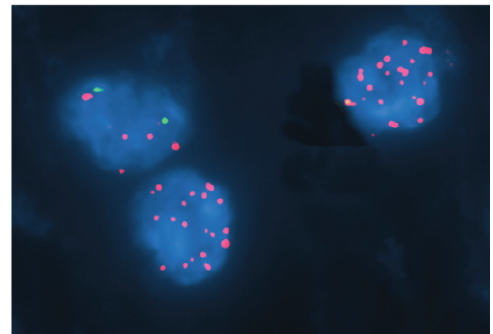

**Supplementary Figure 8. Translocation of 31Mb segment from chromosome 6 to chromosome 5 producing an in-frame fusion of *MYB* and *PCDHGA* in SJLGG005**

**a.** Three SVs were identified, including two chr5-chr6 SVs and one intra-chromosomal SV. The rearrangement predicts a 14kb deletion on chromosome 5 and a 29kb deletion on chromosome 6. **b.** Coverage plot of normalized (tumor minus normal) read-depth for a 39kb region centered on the 29kb deletion projected from the rearrangement. Reduced read depth in the box confirms the deletion indicated by SV analysis.

**a.**

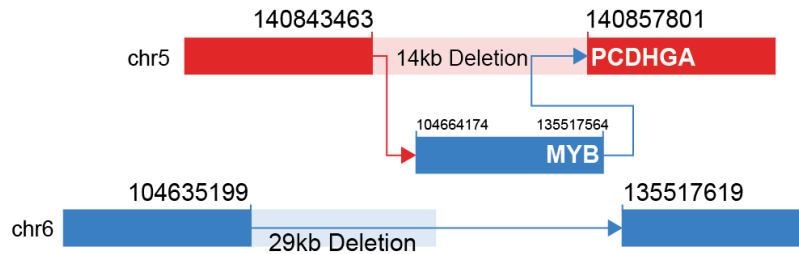

**b.**

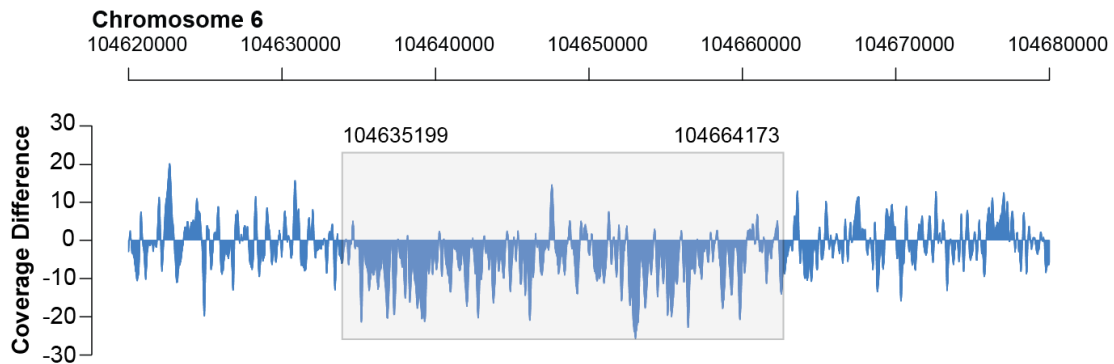

**Supplementary Figure 9. Sanger chromatogram for SJLGG001225 centered on the NF1 W571\* locus**

Wild-type allele is G and mutant allele is A. Top two panels are forward and reverse reads from germline DNA, while bottom two panels are forward and reverse reads from tumor DNA. Note the difference in peak heights for the mutant and wild-type alleles in the tumor sample reflecting loss of heterozygosity at this locus.

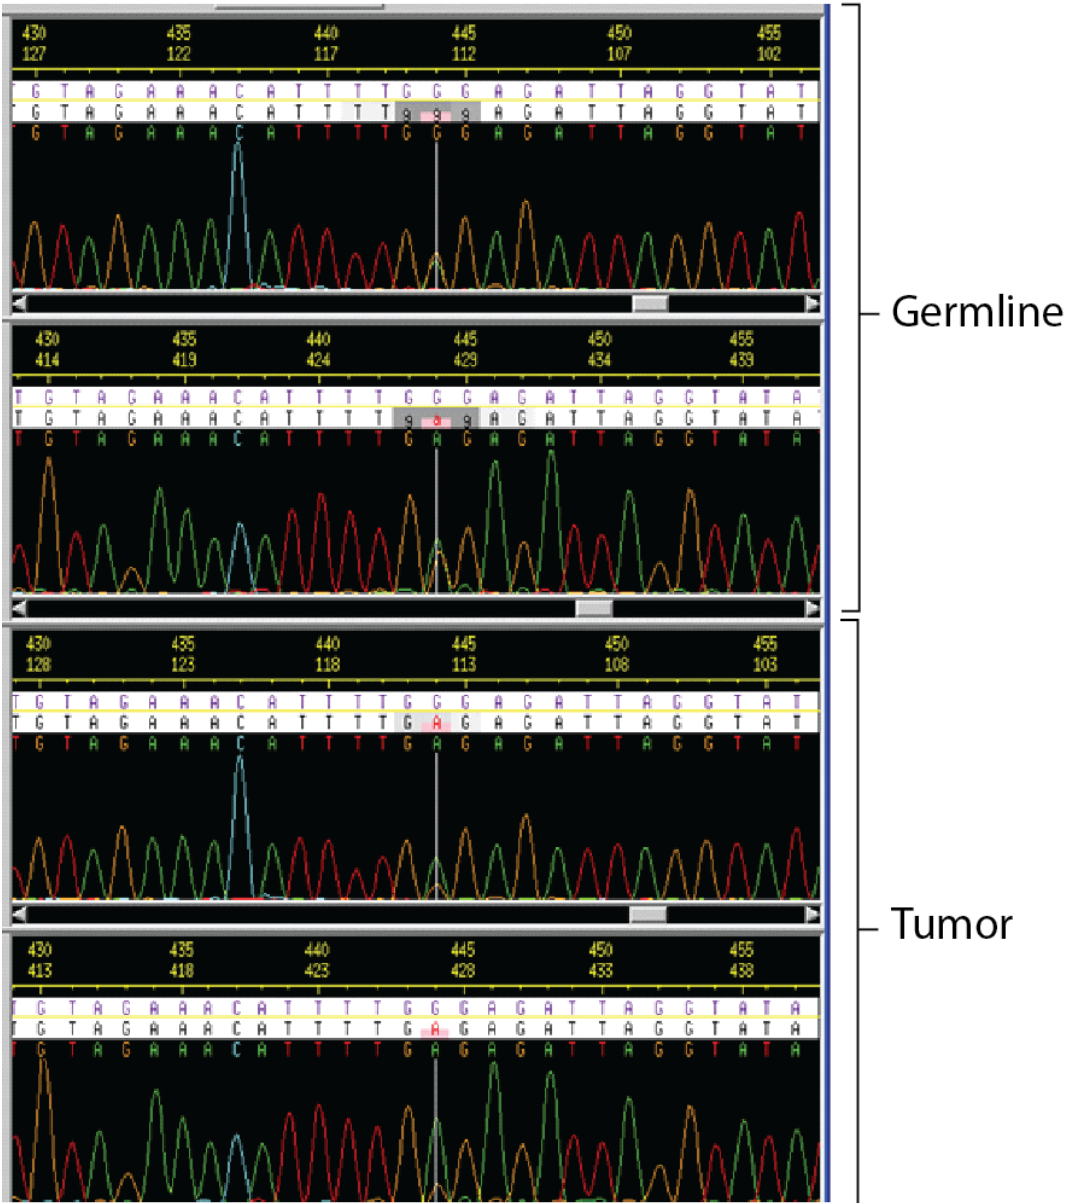

**Supplementary Figure 10. Copy number heatmaps generated for WGS tumor series and non-WGS tumors using SNP array data**

**a.** Copy number estimated from WGS data using CONSERVING. Scale from -1.5 to 1.5.

**b.** Copy number (non-WGS cases) estimated from SNP6 array data. Scale from -1.5 to 1.5.

Tumors are grouped on the basis of clinicopathological features labeled according to color code (see legend box).

**a.**

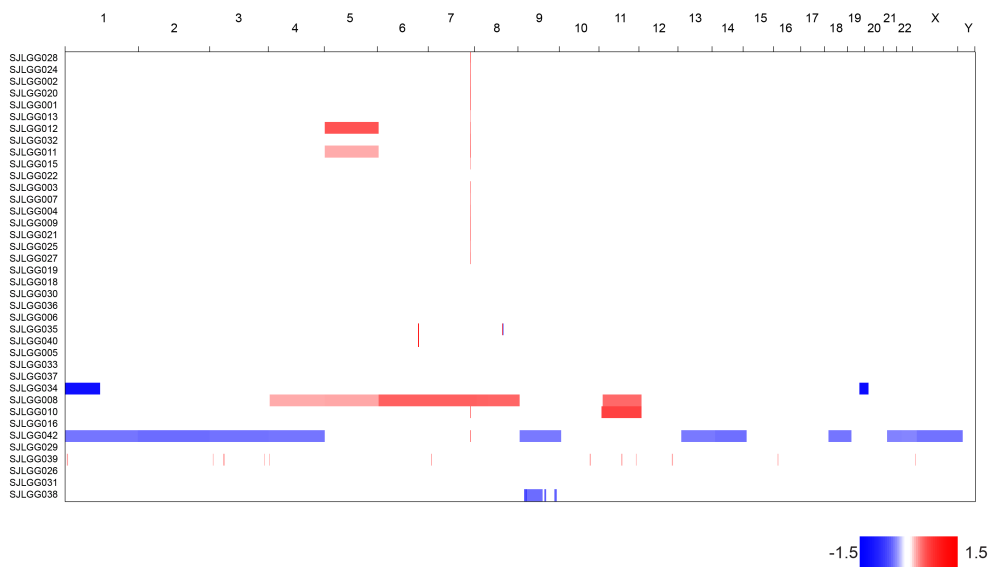

**Legend for Patient Subgroups**

|                                                                                                                     |                                                                                                                             |
|---------------------------------------------------------------------------------------------------------------------|-----------------------------------------------------------------------------------------------------------------------------|
|  KIAA1549-BRAF - Cerebral Cortex |  BRAF <sup>V600E</sup> - Cerebral Cortex |
|  KIAA1549-BRAF - Diencephalon    |  BRAF <sup>V600E</sup> - Diencephalon    |
|  KIAA1549-BRAF - Cerebellum      |  BRAF <sup>V600E</sup> - Brainstem       |
|  KIAA1549-BRAF - Brainstem       |  Other RAS/RAF Aberration                |
|  KIAA1549-BRAF - Spinal Cord     |  FGFR1 Duplication                       |
|                                                                                                                     |  Other Aberration                        |

b.

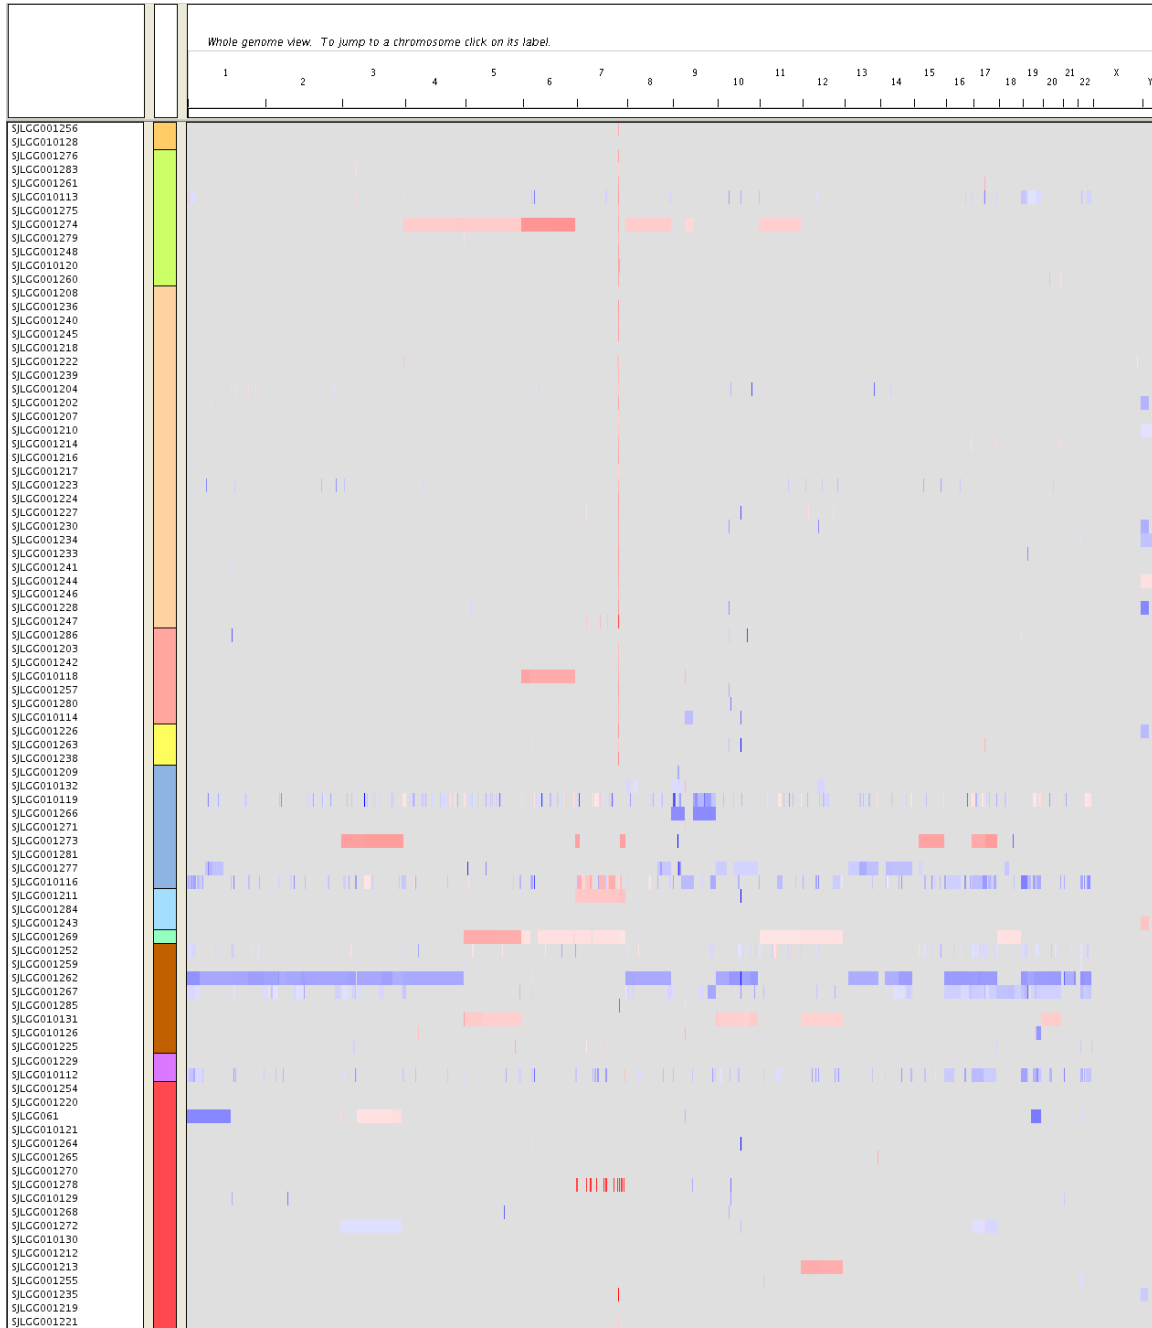

**Supplementary Figure 11. Subclonal multi-chromosome copy number alterations (CNAs) detected by both WGS (top) and SNP array (bottom)**

Alternating green and black blocks represent chromosomes 1-22, X. The y-axis is the  $\log_2$  ratio of the tumor / normal signal derived from (top) the read-depth of WGS data and (bottom) from SNP array probe hybridization signals. **a.** CNA profile for SJLGG008. **b.** CNA profile for SJLGG042. Six chromosomes (4, 5, 6, 7, 8, 11) in SJLGG008 show low-amplitude copy number gain, while 11 chromosomes (1, 2, 3, 4, 9, 13, 14, 18, 21, 22, X) have low-level copy number loss in SJLGG042. Low-level copy number abnormalities were also corroborated by the  $\log_2$  ratio of SNP array data, indicating the presence of subclonal aneuploidy in these tumors.

**a.**

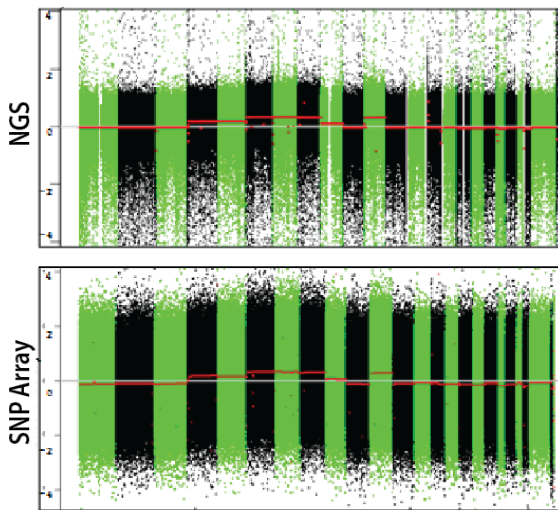

**b.**

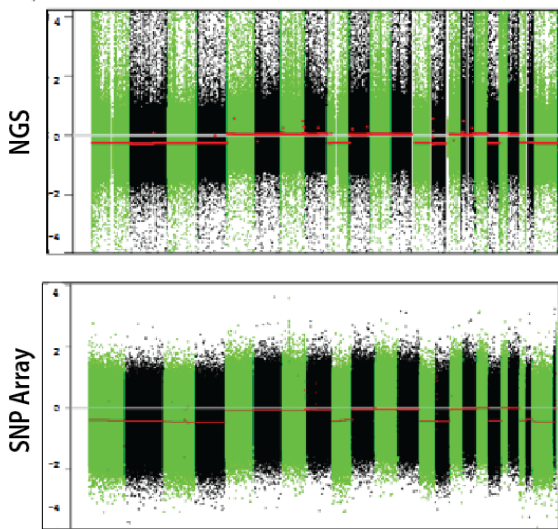

**Supplementary Figure 12. Fusions between FGFR1 and TACC1 (SJLGG018) and FGFR3 and TACC3 (SJLGG001206)**

**a.** Normalized read count of tumor genome (diagnostic sample – red), of matching germline genome (green), and the difference between them (blue) at chr8: 38,100,000-39,000,000 where a rearrangement caused by two SVs was identified. The ends of the amplicon are indicated by dashed lines, while a solid strip marks a 6kb unamplified segment within the amplicon. The breakpoints of the two SVs are indicated diagrammatically in an episome involving *FGFR1* and *TACC1*. **b.** Detail of the genomic read count around the 6kb unamplified segment. **c.** FGFR1-TACC1 fusion protein constructed from the SV junction reads of mRNA-seq data. **d.** FGFR3-TACC3 fusion in tumor SJLGG001206.



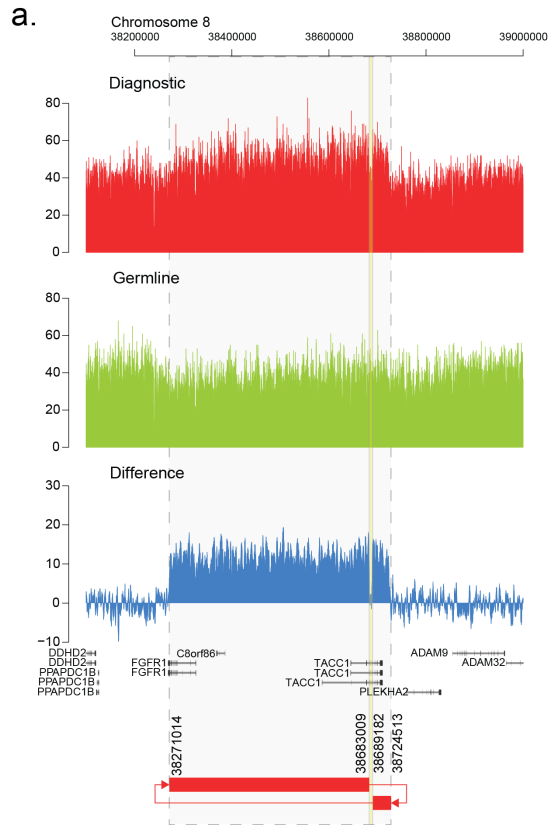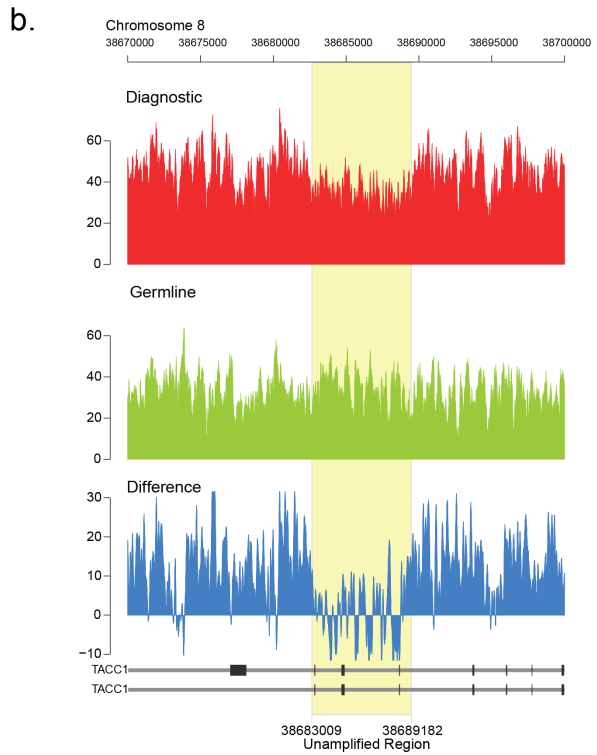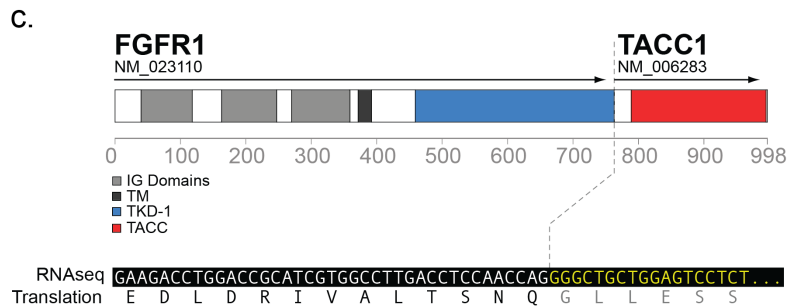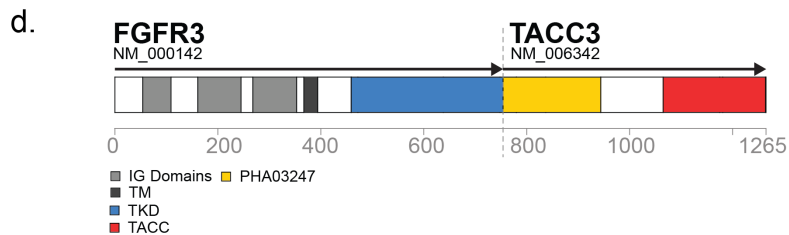

**Supplementary Figure 13. MYB rearrangements identified by WGS and mRNA-seq**

**a.** *MYB* rearrangement indicated by the splitting of green and red signals with 'break apart' iFISH probes. **b.** Start positions of breakpoints across a schematic of the *MYB* protein; the breakpoint for each tumor is indicated by its SJ sample number. **c.** *MYB* fusion partner genes; the breakpoint for each tumor is indicated by its SJ sample number. The *MYB-PCDHGA1* fusion was found in two samples. **d.** Fusion proteins resulting from *MYB* rearrangement; the *MYB-QKI* translocation is reciprocal, resulting in both *MYB-QKI* and *QKI-MYB* gene products.

a.

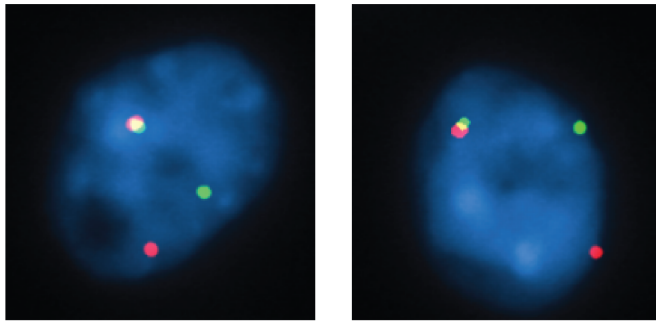

b.

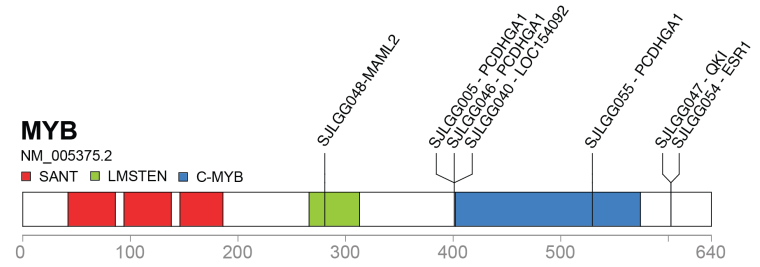

c.

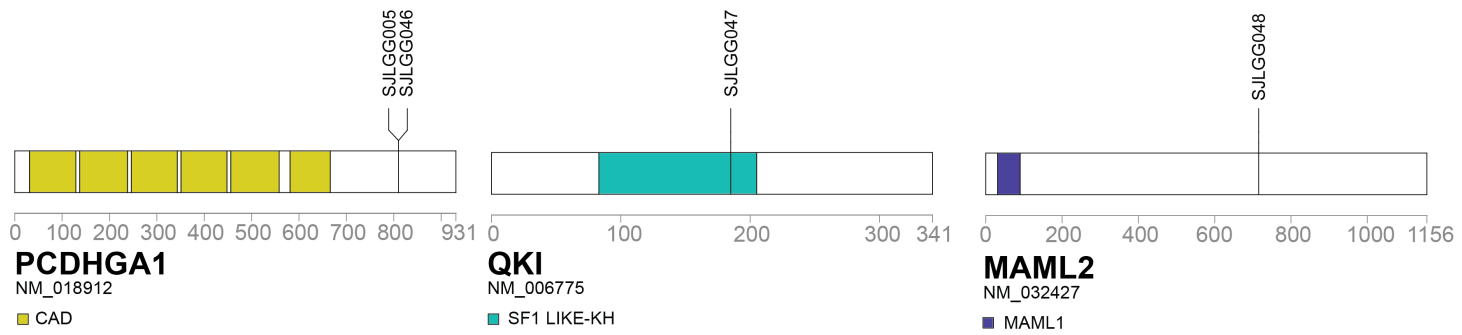

d.

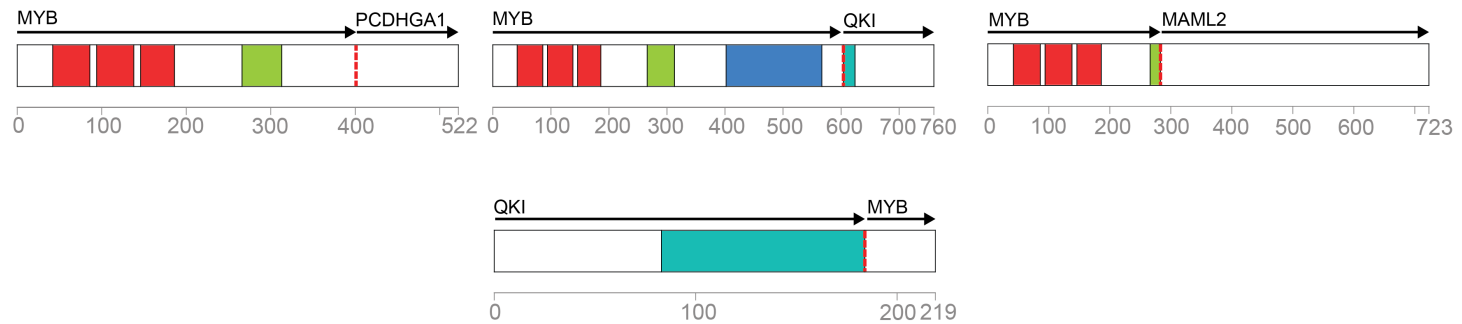

## Supplementary Figure 14. Gene expression profiling using arrays and mRNA-seq

**a.** Unsupervised hierarchical clustering of tumors with gene expression array (Affymetrix U133 plus 2) profiling using top 10% most variable probe sets. The dotted line shows the threshold for determining subgroups. Status (positive: red) of each tumor for genetic alterations (*BRAF*, *FGFR1*, *MYB*), pathological phenotype (pilocytic), sex and anatomic site (ST: supratentorial). **b.** Analysis of association between variables and gene expression subgroups. Raw p values (two-sided Fisher's exact test) were calculated using 2X4 contingency tables. Variables significantly enriched or depleted in each subgroup are marked in red and green, respectively. Significance was determined by FWER (Familywise Error Rate) <0.05. **c.** Gene expression profiling using top 10% most variable exons based on read-depth in mRNA-seq. The dotted line shows the threshold for determining subgroups. Status (positive: red) of each tumor for genetic alterations (*BRAF*, *FGFR* including *FGFR3-TACC3* fusion, *MYB* including *MYBL1* rearrangement), pathological phenotype (pilocytic), sex and anatomic site (ST: supratentorial). **d.** Analysis of association between variables and gene expression subgroups. Raw p values (two-sided Fisher's exact tests) were calculated using 2X3 contingency tables. Variables significantly enriched or depleted in each subgroup are marked in red and green, respectively. Significance was determined by FWER (Familywise Error Rate) <0.05.

a.

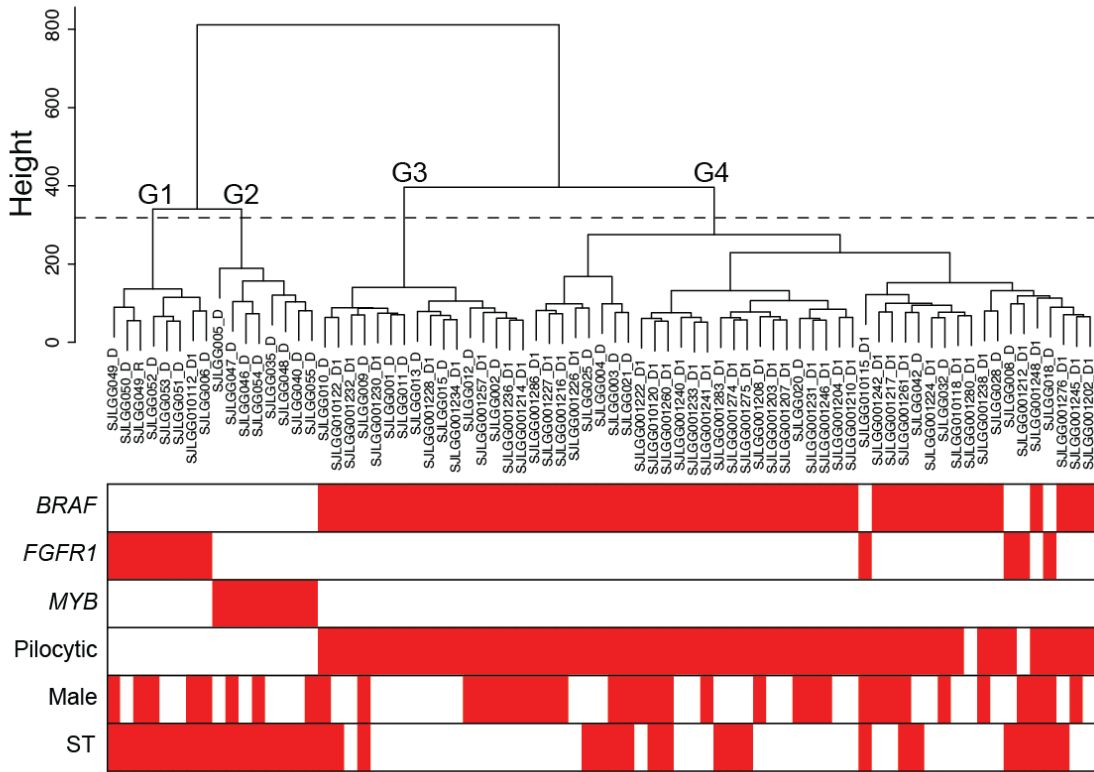

Sample clustering with top 10% most variable probesets

b.

| Group       | G1 (n = 8)                 | G2 (n = 8)                 | G3 (n = 16)                 | G4 (n = 43)                | Total |
|-------------|----------------------------|----------------------------|-----------------------------|----------------------------|-------|
| <i>BRAF</i> | 0 (0%)<br>$p = 7.47E-06$   | 0 (0%)<br>$p = 7.47E-06$   | 16 (100%)<br>$p = 4.18E-03$ | 39 (91%)<br>$p = 1.35E-04$ | 55    |
| <i>FGFR</i> | 8 (100%)<br>$p = 2.93E-08$ | 0 (0%)<br>$p = 3.41E-01$   | 0 (0%)<br>$p = 5.91E-02$    | 4 (9%)<br>$p = 1.09E-01$   | 12    |
| <i>MYB</i>  | 0 (0%)<br>$p = 5.88E-01$   | 8 (100%)<br>$p = 5.93E-11$ | 0 (0%)<br>$p = 1.90E-01$    | 0 (0%)<br>$p = 6.23E-04$   | 8     |
| Pilocytic   | 0 (0%)<br>$p = 2.59E-06$   | 0 (0%)<br>$p = 2.59E-06$   | 16 (100%)<br>$p = 8.48E-03$ | 41 (95%)<br>$p = 5.94E-06$ | 57    |
| Male        | 5 (62%)<br>$p = 7.11E-01$  | 3 (38%)<br>$p = 4.80E-01$  | 7 (44%)<br>$p = 5.83E-01$   | 23 (53%)<br>$p = 6.44E-01$ | 38    |
| ST          | 8 (100%)<br>$p = 1.79E-03$ | 8 (100%)<br>$p = 1.79E-03$ | 3 (19%)<br>$p = 1.08E-02$   | 17 (40%)<br>$p = 1.06E-01$ | 36    |

c.

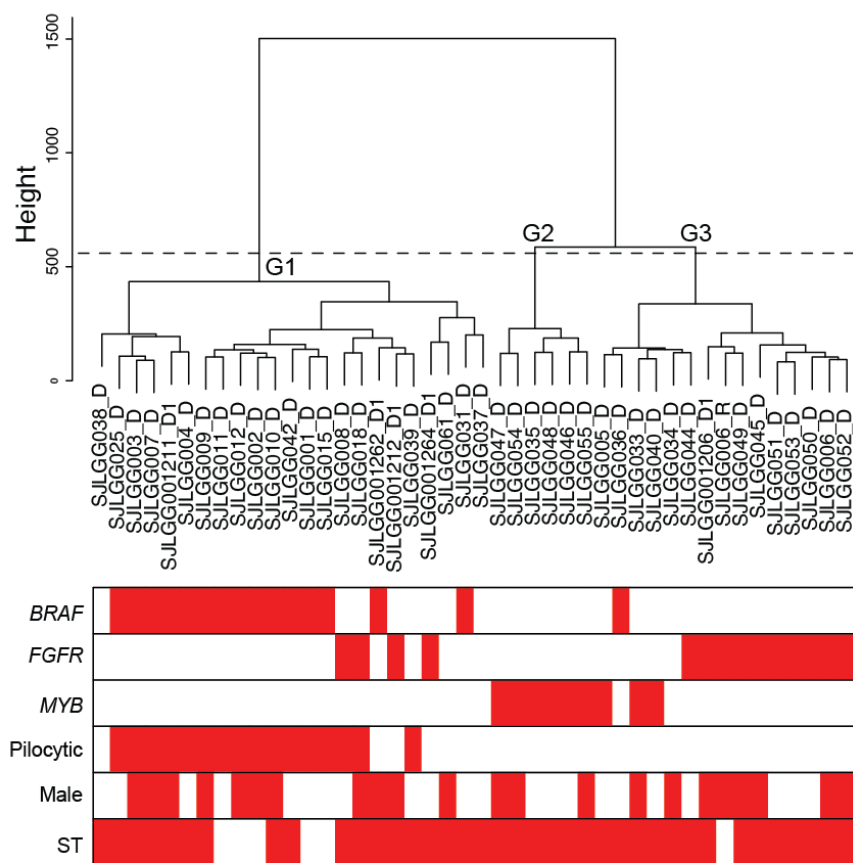

Sample clustering with top 10% most variable exons

d.

| Group         | G1 (n = 23)                | G2 (n = 6)                 | G3 (n = 15)                | Total |
|---------------|----------------------------|----------------------------|----------------------------|-------|
| <i>BRAF</i>   | 15 (65%)<br>$p = 2.83E-05$ | 0 (0%)<br>$p = 7.18E-02$   | 1 (7%)<br>$p = 3.37E-03$   | 16    |
| * <i>FGFR</i> | 4 (17%)<br>$p = 5.16E-02$  | 0 (0%)<br>$p = 1.55E-01$   | 10 (67%)<br>$p = 6.65E-04$ | 14    |
| <i>MYB</i>    | 0 (0%)<br>$p = 4.15E-04$   | 6 (100%)<br>$p = 1.19E-05$ | 3 (20%)<br>$p = 1.00$      | 9     |
| Pilocytic     | 16 (70%)<br>$p = 6.37E-07$ | 0 (0%)<br>$p = 7.18E-02$   | 0 (0%)<br>$p = 1.90E-04$   | 16    |
| Male          | 11 (48%)<br>$p = 1.00$     | 3 (50%)<br>$p = 1.00$      | 8 (53%)<br>$p = 1.00$      | 22    |
| ST            | 18 (78%)<br>$p = 1.88E-01$ | 6 (100%)<br>$p = 5.73E-01$ | 14 (93%)<br>$p = 6.47E-01$ | 38    |

\*Includes *FGFR1* lesions as well as *FGFR3-TACC3* fusion.

### **Supplementary Figure 15. TKD-duplicated FGFR1 proteins**

**a.** The program IUPred was used to analyze disorder, which reflects polypeptide flexibility within the natural N- and C-termini of wild-type (WT) FGFR1, as well as within the linker segments observed in the dual TKD fusion constructs. The C- terminal and N-terminal boundaries of the linkers between the proximal (TKD-1) and distal (TKD-2) TKDs were defined as Y766 and G459 (based on numbering of the WT domain). The IUPred per residue scores (graph between TKD-1 and TKD-2) range from 0 to 1 (light gray bars), with the value of 0.5 as a black bar. Values less than 0.5 are associated with order (foldedness) and those greater than 0.5 are associated with disorder (flexibility). The results indicate that linker peptides are predominantly disordered, consistent with a high degree of flexibility. Samples marked \* were those tested for activity in HEK293T cells.

**b.** HEK293T cells transfected with expression vectors for wt FGFR1 (WT), a dual-TKD FGFR1 variant with no linker (Dp-NLK), and variants of Dp-NLK, Dp006, and Dp008 in which either the proximal or distal TKD was inactivated by mutation (e.g. Dp-NLK-KD-prox or Dp-NLK-KD-dist; KD = kinase-dead). Western blot analysis showed: (i) that Dp-NLK without any inactivating mutation could auto-phosphorylate, but not activate the MAPK pathway, (ii) that ligand-independent auto-phosphorylation was observed with most, but not all, partially kinase-dead mutants, and (iii) that kinase-dead mutants did not activate the MAPK pathway.

a.

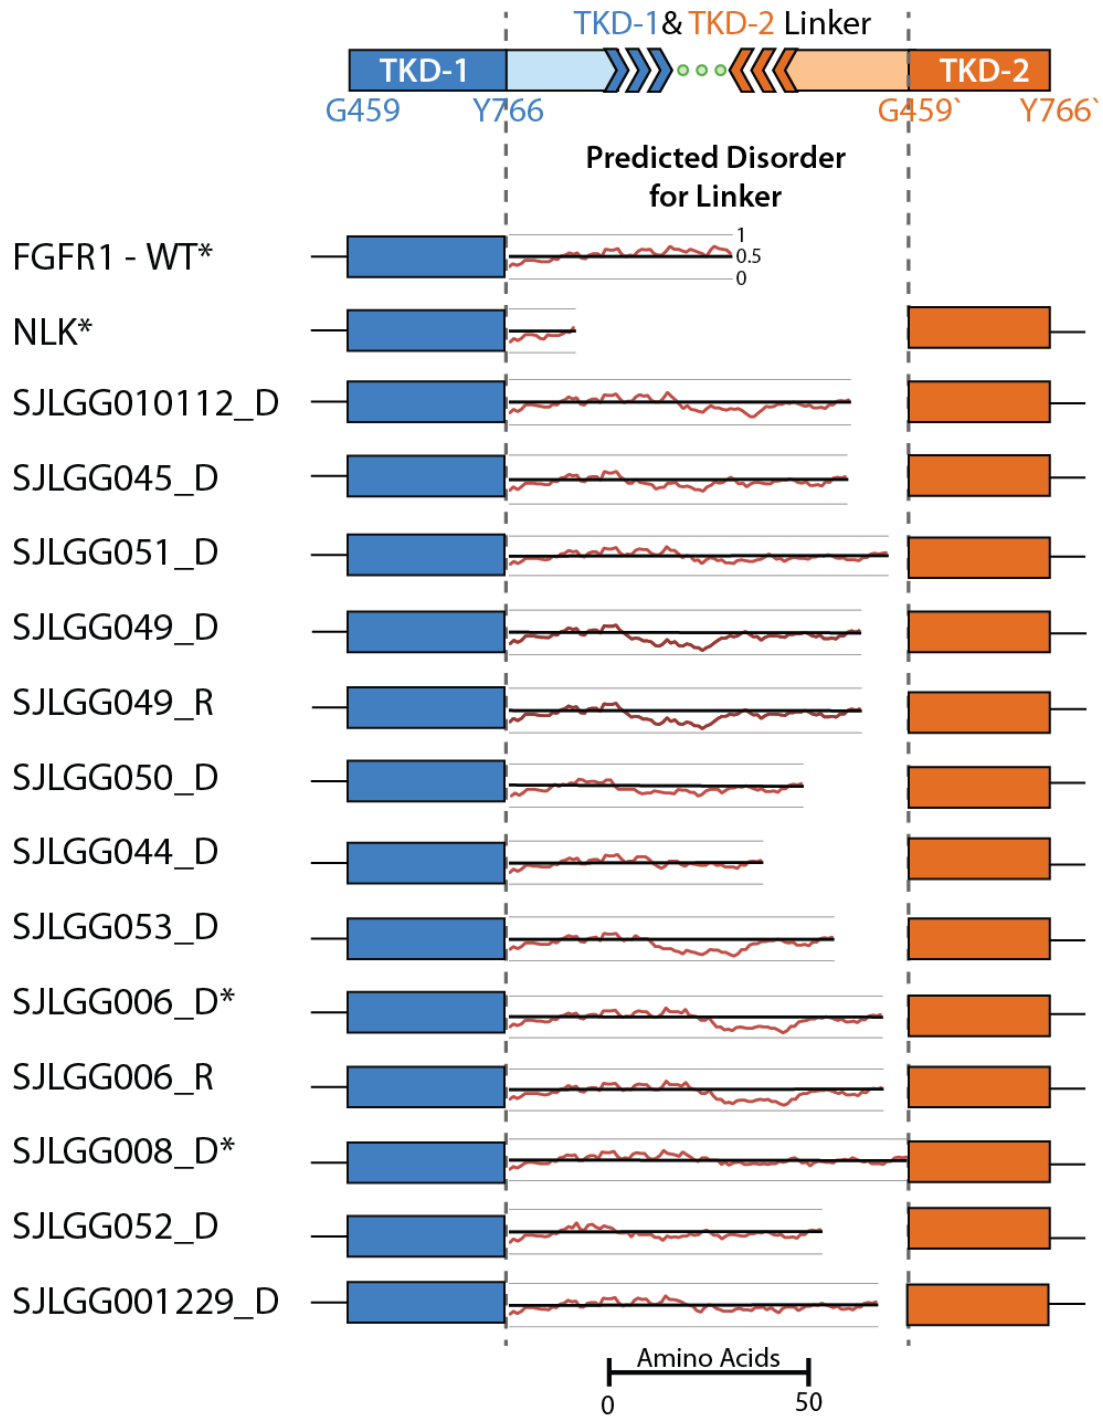



b.

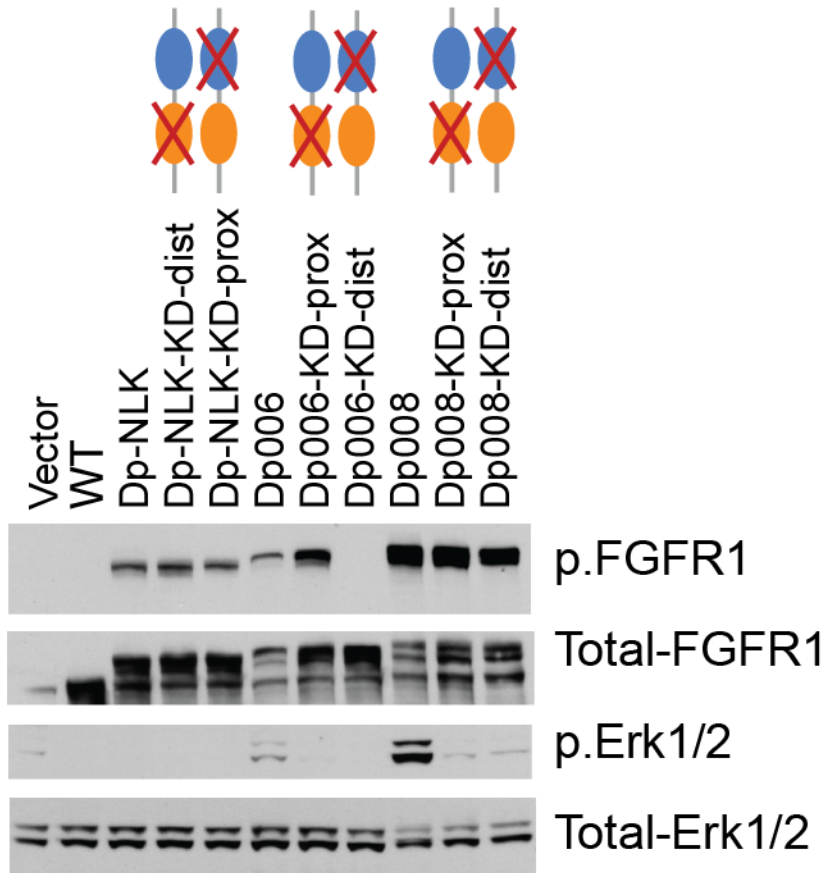

-  Proximal Tyrosine Kinase domain 1 (TKD-1)
-  Distal Tyrosine Kinase domain 2 (TKD-2)
-  Kinase Domain with inactivating mutation (KD)

**Supplementary Table 1**

**Coverage and mapping status of WGS data**

Genomic Coverage: the average coverage of all non-ambiguous bases in hg19.  
 Exon Coverage: the average coverage at all exonic bases (including all noncoding RNAs annotated in RefSeq).  
 % genomic bases covered: the percentage of all non-ambiguous bases covered at least 10x.  
 % exonic bases covered: the percentage of all bases in RefSeq annotated exons covered at least 10x.  
 % coding bases covered: the percentage of all RefSeq protein coding bases covered at least 10x.  
 % SNP detection: concordance of genotype calls derived by WGS and those of Affymetrix SNP 6.0

| Patient  | Sample    | Lanes | % Reads Mapped | Nucleotides Sequenced | Genome Coverage | Haploid Coverage | Exon Coverage | % Genomic bases covered | % Exonic bases covered | % Coding bases covered | % SNP Detection |
|----------|-----------|-------|----------------|-----------------------|-----------------|------------------|---------------|-------------------------|------------------------|------------------------|-----------------|
| SJLGG001 | Diagnosis | 5     | 95.18          | 166,408,914,800       | 46.2            | 41.93            | 42.4          | 99                      | 93                     | 93                     | 99.23           |
| SJLGG001 | Germline  | 4     | 95.4           | 100,849,617,400       | 29              | 34.6             | 26.2          | 98                      | 90                     | 89                     | 99.22           |
| SJLGG002 | Diagnosis | 8     | 94.96          | 186,395,497,400       | 51.2            | 38.21            | 45.8          | 99                      | 93                     | 93                     | 99.38           |
| SJLGG002 | Germline  | 8     | 94.96          | 104,221,185,000       | 29.8            | 34.23            | 27            | 98                      | 91                     | 90                     | 99.51           |
| SJLGG003 | Diagnosis | 5     | 95.31          | 149,292,812,200       | 41.2            | 41.85            | 38.1          | 99                      | 94                     | 93                     | 99.12           |
| SJLGG003 | Germline  | 4     | 94.98          | 128,421,658,800       | 35.5            | 36.06            | 32.6          | 98                      | 92                     | 91                     | 99.4            |
| SJLGG004 | Diagnosis | 5     | 95.21          | 146,398,835,200       | 41.9            | 42.62            | 37.1          | 99                      | 93                     | 92                     | 99.14           |
| SJLGG004 | Germline  | 4     | 95.31          | 128,902,756,600       | 34.6            | 35.15            | 33.4          | 99                      | 97                     | 97                     | 99.59           |
| SJLGG005 | Diagnosis | 5     | 95.42          | 193,918,962,400       | 50.8            | 51.16            | 46.4          | 99                      | 93                     | 93                     | 99.14           |
| SJLGG005 | Germline  | 4     | 95.21          | 128,242,772,800       | 32.2            | 32.29            | 30.8          | 99                      | 97                     | 97                     | 99.54           |
| SJLGG006 | Diagnosis | 5     | 95.2           | 203,604,103,600       | 55.8            | 57.79            | 47.8          | 98                      | 90                     | 89                     | 99.28           |
| SJLGG006 | Germline  | 3     | 93.65          | 118,647,418,400       | 33.3            | 34.04            | 29            | 98                      | 88                     | 86                     | 99.17           |
| SJLGG006 | Relapse   | 5     | 94.97          | 167,357,521,600       | 47.6            | 48.42            | 43.3          | 99                      | 93                     | 92                     | 99.45           |
| SJLGG007 | Diagnosis | 5     | 94.25          | 202,384,639,000       | 56.3            | 57.4             | 49.2          | 99                      | 91                     | 90                     | 99.29           |
| SJLGG007 | Germline  | 3     | 94.54          | 116,042,216,000       | 33.9            | 34.42            | 29.9          | 98                      | 90                     | 89                     | 99.26           |
| SJLGG008 | Diagnosis | 5     | 95.72          | 191,580,567,800       | 52.1            | 52.88            | 45.1          | 99                      | 93                     | 92                     | 99.47           |
| SJLGG008 | Germline  | 3     | 94.48          | 119,935,146,000       | 35              | 35.56            | 30.9          | 99                      | 93                     | 93                     | 99.51           |
| SJLGG009 | Diagnosis | 5     | 95.8           | 206,164,401,200       | 51              | 52.17            | 48.6          | 99                      | 98                     | 99                     | 99.59           |
| SJLGG009 | Germline  | 3     | 95.83          | 124,671,895,400       | 33.4            | 34.04            | 32.1          | 99                      | 97                     | 98                     | 99.58           |
| SJLGG010 | Diagnosis | 5     | 95.41          | 194,699,337,600       | 48.6            | 49.3             | 46.8          | 99                      | 98                     | 99                     | 99.57           |
| SJLGG010 | Germline  | 3     | 95.16          | 124,693,263,800       | 33.8            | 34.31            | 32.1          | 99                      | 97                     | 98                     | 99.56           |
| SJLGG011 | Diagnosis | 5     | 95.96          | 190,182,982,400       | 46.8            | 47.14            | 44.9          | 99                      | 99                     | 99                     | 99.55           |
| SJLGG011 | Germline  | 3     | 95.56          | 117,541,885,000       | 32              | 32.22            | 30.5          | 99                      | 98                     | 98                     | 99.53           |
| SJLGG012 | Diagnosis | 5     | 95.76          | 171,595,046,600       | 43.3            | 43.68            | 41.5          | 99                      | 98                     | 98                     | 99.59           |
| SJLGG012 | Germline  | 3     | 95.56          | 112,886,966,600       | 29.7            | 29.93            | 28.4          | 98                      | 97                     | 97                     | 99.56           |
| SJLGG013 | Diagnosis | 5     | 95.61          | 192,615,886,800       | 47.8            | 48.09            | 41.8          | 98                      | 92                     | 92                     | 99.5            |
| SJLGG013 | Germline  | 3     | 95.73          | 116,031,634,800       | 34.8            | 35.04            | 30.4          | 97                      | 90                     | 88                     | 99.34           |
| SJLGG015 | Diagnosis | 5     | 96.24          | 207,816,677,400       | 61.4            | 62.16            | 54.1          | 99                      | 95                     | 94                     | 99.55           |
| SJLGG015 | Germline  | 3     | 93.62          | 127,812,011,200       | 36.3            | 36.59            | 32.4          | 99                      | 93                     | 92                     | 99.49           |
| SJLGG016 | Diagnosis | 5     | 95.45          | 183,555,139,400       | 48.9            | 49.63            | 43.5          | 99                      | 94                     | 93                     | 99.51           |
| SJLGG016 | Germline  | 3     | 95.58          | 121,900,720,600       | 35.9            | 36.53            | 32.1          | 98                      | 93                     | 92                     | 99.48           |
| SJLGG018 | Diagnosis | 5     | 95.25          | 161,350,454,600       | 46.3            | 47.63            | 41.1          | 99                      | 96                     | 96                     | 99.57           |
| SJLGG018 | Germline  | 3     | 93.28          | 110,778,253,800       | 31.4            | 32.37            | 27.3          | 98                      | 94                     | 94                     | 99.47           |
| SJLGG019 | Diagnosis | 5     | 92.83          | 160,018,056,000       | 46.2            | 47.61            | 43            | 98                      | 97                     | 97                     | 99.55           |
| SJLGG019 | Germline  | 3     | 94.51          | 103,983,775,000       | 29.8            | 31.54            | 28.1          | 98                      | 96                     | 96                     | 99.5            |
| SJLGG020 | Diagnosis | 5     | 94.26          | 147,912,380,800       | 43.5            | 44.24            | 41.3          | 99                      | 98                     | 98                     | 99.56           |
| SJLGG020 | Germline  | 3     | 93.64          | 98,277,317,400        | 29.2            | 29.62            | 27.1          | 98                      | 96                     | 96                     | 99.5            |
| SJLGG021 | Diagnosis | 5     | 94.41          | 156,384,864,600       | 45.6            | 46.19            | 42.7          | 99                      | 98                     | 98                     | 99.57           |
| SJLGG021 | Germline  | 3     | 94.63          | 136,805,499,600       | 40.1            | 27.74            | 36.8          | 99                      | 97                     | 97                     | 99.44           |
| SJLGG022 | Diagnosis | 5     | 94.67          | 165,283,001,600       | 49.5            | 50.03            | 46.6          | 98                      | 98                     | 98                     | 99.59           |
| SJLGG022 | Germline  | 3     | 94.72          | 101,757,995,600       | 30.8            | 31.04            | 28.9          | 98                      | 97                     | 97                     | 99.56           |
| SJLGG024 | Diagnosis | 5     | 94.81          | 194,310,538,600       | 57.2            | 58.01            | 52.1          | 98                      | 96                     | 96                     | 99.58           |
| SJLGG024 | Germline  | 3     | 93.23          | 120,657,136,800       | 35.4            | 35.85            | 31.6          | 98                      | 95                     | 95                     | 99.56           |
| SJLGG025 | Diagnosis | 5     | 93.18          | 216,844,979,600       | 61.4            | 65.02            | 53.8          | 98                      | 96                     | 96                     | 99.51           |
| SJLGG025 | Germline  | 3     | 91.56          | 133,551,266,800       | 37.1            | 38.73            | 32.8          | 98                      | 95                     | 95                     | 99.44           |
| SJLGG026 | Diagnosis | 5     | 93.41          | 231,236,306,400       | 65.3            | 68.06            | 60.2          | 99                      | 98                     | 98                     | 99.53           |
| SJLGG026 | Germline  | 3     | 94.34          | 135,915,628,600       | 39.7            | 41.27            | 36            | 99                      | 97                     | 97                     | 99.53           |
| SJLGG027 | Diagnosis | 5     | 89.73          | 216,501,556,600       | 60.1            | 62.26            | 54.3          | 98                      | 97                     | 97                     | 99.6            |
| SJLGG027 | Germline  | 3     | 92.53          | 130,078,719,800       | 37.8            | 39.04            | 34.4          | 98                      | 97                     | 97                     | 99.6            |
| SJLGG028 | Diagnosis | 5     | 91.13          | 205,241,413,000       | 55.5            | 59.31            | 49.4          | 98                      | 97                     | 97                     | 99.56           |
| SJLGG028 | Germline  | 3     | 89.59          | 125,184,478,800       | 33.9            | 36.14            | 29.4          | 98                      | 95                     | 95                     | 99.42           |
| SJLGG029 | Diagnosis | 5     | 93.96          | 233,216,345,400       | 66              | 69.27            | 58.3          | 99                      | 98                     | 98                     | 99.57           |
| SJLGG029 | Germline  | 3     | 92.81          | 139,871,360,000       | 39.8            | 41.31            | 34.5          | 99                      | 96                     | 97                     | 99.55           |
| SJLGG030 | Diagnosis | 5     | 93.31          | 220,768,809,200       | 61              | 64.55            | 54.6          | 99                      | 98                     | 98                     | 99.52           |
| SJLGG030 | Germline  | 3     | 92.76          | 133,882,264,600       | 37.6            | 39.53            | 33.5          | 99                      | 96                     | 97                     | 99.52           |
| SJLGG031 | Diagnosis | 5     | 92.62          | 206,461,133,400       | 57.7            | 60.46            | 50.8          | 98                      | 98                     | 98                     | 99.59           |
| SJLGG031 | Germline  | 3     | 93.99          | 132,379,685,200       | 38.2            | 39.77            | 34.2          | 98                      | 97                     | 98                     | 99.58           |
| SJLGG032 | Diagnosis | 5     | 90.51          | 173,483,837,000       | 46.7            | 49.59            | 41.9          | 99                      | 96                     | 96                     | 99.49           |
| SJLGG032 | Germline  | 3     | 91.2           | 127,724,489,400       | 35.7            | 37.35            | 32            | 99                      | 95                     | 95                     | 99.48           |
| SJLGG033 | Diagnosis | 5     | 90.21          | 214,166,032,400       | 58.4            | 61.71            | 52.1          | 99                      | 97                     | 97                     | 99.55           |
| SJLGG033 | Germline  | 3     | 90.95          | 130,830,833,000       | 35.2            | 36.78            | 31.7          | 98                      | 92                     | 91                     | 99.42           |
| SJLGG034 | Diagnosis | 5     | 91.58          | 212,051,387,600       | 58.4            | 61.45            | 51.9          | 99                      | 96                     | 96                     | 99.55           |
| SJLGG034 | Germline  | 3     | 90.45          | 123,804,138,200       | 33.5            | 34.85            | 29.6          | 98                      | 90                     | 89                     | 99.33           |
| SJLGG035 | Diagnosis | 5     | 91.79          | 195,096,456,800       | 53.6            | 55.47            | 47.7          | 98                      | 96                     | 96                     | 99.57           |
| SJLGG035 | Germline  | 3     | 92.54          | 115,639,977,200       | 33.3            | 34.29            | 29.3          | 98                      | 94                     | 94                     | 99.51           |
| SJLGG036 | Diagnosis | 5     | 91.83          | 194,104,117,200       | 52.8            | 55.18            | 47.2          | 99                      | 96                     | 96                     | 99.52           |
| SJLGG036 | Germline  | 3     | 91.71          | 116,085,183,000       | 32.7            | 33.89            | 29            | 98                      | 94                     | 94                     | 99.48           |
| SJLGG037 | Diagnosis | 5     | 94.92          | 215,432,203,600       | 61.8            | 63.78            | 55.6          | 99                      | 97                     | 97                     | 99.58           |
| SJLGG037 | Germline  | 3     | 94.29          | 130,660,147,000       | 38              | 39.03            | 33.2          | 99                      | 95                     | 95                     | 99.56           |
| SJLGG038 | Diagnosis | 5     | 94.44          | 208,642,455,600       | 60.4            | 61.79            | 53.5          | 98                      | 95                     | 95                     | 99.53           |
| SJLGG038 | Germline  | 3     | 92.94          | 127,394,657,800       | 36.8            | 37.56            | 33            | 98                      | 94                     | 94                     | 99.53           |
| SJLGG039 | Diagnosis | 5     | 94.98          | 216,169,462,000       | 63.5            | 64.97            | 57.9          | 98                      | 96                     | 96                     | 99.59           |
| SJLGG039 | Germline  | 3     | 93.38          | 123,418,128,400       | 36.6            | 37.25            | 32.8          | 98                      | 95                     | 95                     | 99.58           |
| SJLGG040 | Diagnosis | 5     | 93.92          | 226,340,769,400       | 64.2            | 66.59            | 56.9          | 98                      | 97                     | 97                     | 99.55           |
| SJLGG040 | Germline  | 3     | 94.16          | 133,771,368,600       | 39.2            | 40.16            | 35            | 98                      | 97                     | 97                     | 99.55           |
| SJLGG042 | Diagnosis | 5     | 91.9           | 158,260,673,800       | 44.8            | 45.9             | 38.7          | 97                      | 88                     | 86                     | 99.07           |
| SJLGG042 | Germline  | 3     | 92.16          | 120,511,902,400       | 34.6            | 35.86            | 28.8          | 96                      | 83                     | 79                     | 98.49           |

**Supplementary Table 2**

**Summary of somatic sequence mutations, SVs and copy number abnormalities identified in 39 LGG cases analyzed by WGS**

\* The majority (87%) of tier 1 mutations, including all non-silent mutations, were validated.

^ Tiers 2-3 include only high-quality or validated mutations. The average validation rate for these is 95%. Numbers of SVs and DNA CNVs in each case are not the same because (i) some SVs are copy-neutral rearrangements, (ii) CNVs from chromosomal gain or loss extending to the telomere will not be detected by WGS SV identification algorithms, and (iii) some CNV breakpoints are in repetitive or unmappable regions and will not be detected by SV algorithms.

# The background mutation rate (BMR) was derived from the number of bases in non-repetitive genomic regions covered by WGS at >10x depth. Three samples (SJLGG016, SJLGG036, SJLGG039) with low tumor content were excluded from the calculation.

| Sample             | Sequence mutations |                  |        |        |            | Copy number alterations (CNA) |          |         |          | SV | Combined CNV/SV (N) |
|--------------------|--------------------|------------------|--------|--------|------------|-------------------------------|----------|---------|----------|----|---------------------|
|                    | *tier1             | non-silent tier1 | ^tier2 | ^tier3 | #BMR       | Amp (N)                       | Amp (Mb) | Del (N) | Del (Mb) |    |                     |
| SJLGG001           | 1                  | 0                | 8      | 43     | 4.2203E-08 | 1                             | 1.94     | 0       | 0        | 1  | 1                   |
| SJLGG002           | 1                  | 0                | 3      | 36     | 3.2365E-08 | 1                             | 1.95     | 1       | 0.01     | 1  | 2                   |
| SJLGG003           | 1                  | 0                | 2      | 16     | 1.5346E-08 | 2                             | 1.94     | 1       | 0        | 1  | 3                   |
| SJLGG004           | 2                  | 1                | 2      | 24     | 2.2597E-08 | 1                             | 1.94     | 0       | 0        | 1  | 1                   |
| SJLGG005           | 1                  | 0                | 1      | 28     | 2.4183E-08 | 0                             | 0        | 3       | 0.04     | 3  | 3                   |
| SJLGG006           | 0                  | 0                | 1      | 7      | 6.5184E-09 | 1                             | 0.01     | 0       | 0        | 1  | 1                   |
| SJLGG006R          | 0                  | 0                | 1      | 7      | 6.5135E-09 | 0                             | 0        | 0       | 0        | 1  | 1                   |
| SJLGG007           | 1                  | 0                | 3      | 18     | 1.7847E-08 | 1                             | 1.94     | 0       | 0        | 1  | 1                   |
| SJLGG008           | 12                 | 3                | 13     | 146    | 1.3812E-07 | 8                             | 977.22   | 0       | 0        | 1  | 8                   |
| SJLGG009           | 5                  | 1                | 7      | 33     | 3.6056E-08 | 1                             | 1.95     | 1       | 0        | 2  | 2                   |
| SJLGG010           | 4                  | 2                | 1      | 48     | 4.2455E-08 | 2                             | 136.96   | 0       | 0        | 1  | 2                   |
| SJLGG011           | 4                  | 0                | 8      | 75     | 6.9714E-08 | 2                             | 182.86   | 0       | 0        | 1  | 2                   |
| SJLGG012           | 4                  | 1                | 9      | 91     | 8.3405E-08 | 2                             | 182.85   | 0       | 0        | 1  | 2                   |
| SJLGG013           | 1                  | 0                | 1      | 11     | 5.6801E-09 | 1                             | 1.94     | 0       | 0        | 1  | 1                   |
| SJLGG015           | 2                  | 2                | 2      | 22     | 2.0984E-08 | 2                             | 1.98     | 0       | 0        | 1  | 2                   |
| SJLGG016           | 0                  | 0                | 1      | 1      | 1.6131E-09 | 0                             | 0        | 1       | 0        | 1  | 1                   |
| SJLGG018           | 1                  | 1                | 5      | 22     | 2.2558E-08 | 2                             | 0.45     | 1       | 0        | 2  | 3                   |
| SJLGG019           | 2                  | 1                | 0      | 8      | 8.0353E-09 | 1                             | 0.04     | 1       | 0.04     | 1  | 2                   |
| SJLGG020           | 0                  | 0                | 8      | 37     | 3.6172E-08 | 1                             | 1.96     | 0       | 0        | 1  | 1                   |
| SJLGG021           | 0                  | 0                | 2      | 13     | 1.2021E-08 | 1                             | 1.94     | 0       | 0        | 1  | 1                   |
| SJLGG022           | 1                  | 1                | 2      | 1      | 3.2129E-09 | 0                             | 0        | 0       | 0        | 0  | 0                   |
| SJLGG024           | 2                  | 1                | 5      | 27     | 2.7337E-08 | 1                             | 1.95     | 0       | 0        | 1  | 1                   |
| SJLGG025           | 0                  | 0                | 1      | 22     | 1.8492E-08 | 1                             | 1.95     | 0       | 0        | 1  | 1                   |
| SJLGG026           | 0                  | 0                | 0      | 6      | 4.8074E-09 | 0                             | 0        | 0       | 0        | 1  | 1                   |
| SJLGG027           | 3                  | 2                | 5      | 31     | 3.1272E-08 | 1                             | 1.94     | 0       | 0        | 1  | 1                   |
| SJLGG028           | 1                  | 0                | 5      | 30     | 2.8972E-08 | 2                             | 1.99     | 0       | 0        | 1  | 2                   |
| SJLGG029           | 2                  | 1                | 3      | 42     | 3.7689E-08 | 0                             | 0        | 0       | 0        | 0  | 0                   |
| SJLGG030           | 1                  | 1                | 2      | 17     | 8.4189E-09 | 0                             | 0        | 0       | 0        | 0  | 0                   |
| SJLGG031           | 1                  | 0                | 1      | 4      | 4.8095E-09 | 0                             | 0        | 0       | 0        | 2  | 2                   |
| SJLGG032           | 3                  | 0                | 4      | 39     | 3.6992E-08 | 1                             | 1.95     | 0       | 0        | 1  | 1                   |
| SJLGG033           | 2                  | 1                | 3      | 27     | 2.5829E-08 | 0                             | 0        | 3       | 0        | 5  | 6                   |
| SJLGG034           | 12                 | 5                | 10     | 191    | 1.7257E-07 | 0                             | 0        | 2       | 152.59   | 0  | 2                   |
| SJLGG035           | 1                  | 1                | 4      | 21     | 2.0926E-08 | 4                             | 1.1      | 5       | 4.49     | 4  | 9                   |
| SJLGG036           | 1                  | 1                | 0      | 0      | 8.0473E-10 | 0                             | 0        | 0       | 0        | 0  | 0                   |
| SJLGG037           | 5                  | 1                | 3      | 22     | 2.4095E-08 | 0                             | 0        | 0       | 0        | 0  | 0                   |
| SJLGG038           | 1                  | 1                | 4      | 59     | 5.1495E-08 | 3                             | 0.04     | 10      | 77.3     | 13 | 13                  |
| SJLGG039           | 0                  | 0                | 1      | 11     | 9.6412E-09 | 13                            | 37.84    | 0       | 0        | 19 | 19                  |
| SJLGG040           | 7                  | 2                | 3      | 48     | 4.6502E-08 | 2                             | 0.47     | 1       | 0        | 2  | 3                   |
| SJLGG042           | 6                  | 1                | 15     | 110    | 1.0865E-07 | 1                             | 1.95     | 11      | 1578.14  | 1  | 12                  |
| All                | 91                 | 31               | 149    | 1394   |            | 59                            | 1551     | 41      | 1813     | 76 | 113                 |
| mean               | 2                  | 1                | 4      | 36     | 3.351E-08  | 2                             | 40       | 1       | 46       | 2  | 3                   |
| standard deviation | 3                  | 1                | 4      | 40     | 3.673E-08  | 2                             | 161      | 2       | 253      | 4  | 4                   |
| median             | 1                  | 1                | 3      | 24     | 2.2597E-08 | 1                             | 2        | 0       | 0        | 1  | 2                   |
| min                | 0                  | 0                | 0      | 0      | 3.2129E-09 | 0                             | 0        | 0       | 0        | 0  | 0                   |
| max                | 12                 | 5                | 15     | 191    | 1.7257E-07 | 13                            | 977      | 11      | 1578     | 19 | 19                  |

**Supplementary Table 3**

**Comparison of coverage and somatic coding mutation detection by exome sequencing and WGS**

| Sample     | Exome sequencing |                                                                                                                      |        | WGS              |                                                                                                                                                                                         |
|------------|------------------|----------------------------------------------------------------------------------------------------------------------|--------|------------------|-----------------------------------------------------------------------------------------------------------------------------------------------------------------------------------------|
|            | Average coverage | Coding mutation(s)                                                                                                   | Source | Average coverage | Coding mutation(s)                                                                                                                                                                      |
| SJLGG005_D | 303              | <i>RANBP6</i> <sup>P917L</sup>                                                                                       | UK     | 48               | <i>CACNA1A</i> <sup>Y1446Y</sup>                                                                                                                                                        |
| SJLGG008_D | 38               | <i>DSG1</i> <sup>N286Y</sup> <i>FLT1</i> <sup>L29I</sup> <i>FLT1</i> <sup>T48A</sup> <i>SLC28A2</i> <sup>A335A</sup> | BGI    | 44               | <i>DSG1</i> <sup>N286Y</sup> <i>FLT1</i> <sup>L29I</sup> <i>FLT1</i> <sup>T48A</sup> <i>SLC28A2</i> <sup>A335A</sup> <i>MUC4</i> <sup>F4995F</sup> <i>CDH13</i> <sup>V16_E2splice</sup> |
| SJLGG030_D | 63               | <i>BRAF</i> <sup>V600E</sup> <i>ALDH18A1</i> <sup>I153V</sup>                                                        | BGI    | 54               | <i>BRAF</i> <sup>V600E</sup>                                                                                                                                                            |
| SJLGG035_D | 334              | <i>DCTN1</i> <sup>R149*</sup>                                                                                        | UK     | 47               | <i>DCTN1</i> <sup>R149*</sup>                                                                                                                                                           |
| SJLGG036_D | 310              | <i>BRAF</i> <sup>V600E</sup>                                                                                         | UK     | 47               | <i>BRAF</i> <sup>V600E</sup>                                                                                                                                                            |
| SJLGG037_D | 324              | <i>COL14A1</i> <sup>P1482P</sup> <i>H3F3A</i> <sup>K27M</sup> <i>HUWE1</i> <sup>E2345E</sup>                         | UK     | 56               | <i>COL14A1</i> <sup>P1482P</sup> <i>H3F3A</i> <sup>K27M</sup> <i>HUWE1</i> <sup>E2345E</sup>                                                                                            |
| SJLGG039_D | 343              | none                                                                                                                 | UK     | 58               | none                                                                                                                                                                                    |

Mutations detected by only one method are shown in red.

Supplementary Table 4

## Clinical, pathological and genetic abnormalities of all 151 tumors in study cohort

Suffix ‘\_D’ or ‘\_D1’ denotes a biopsy from first diagnostic surgery. Two recurrent tumors have the suffix ‘\_R’.  
Genetic abnormalities were identified by multiple approaches, including WGS, RNA-seq, IFISH, and RT-PCR / Sanger sequencing.

| SJ Sample Name | Series                   | Age @ Sx | Sex | Site | Dx   | FGFR abnormality        | MYB / MYBL1 abnormality | BRAF abnormality | NF1 mutation | KRAS mutation | RAF1 fusion  | Histone-related genes | Miscellaneous SNV #1 | Miscellaneous SNV #2      | Miscellaneous SNV #3 | Miscellaneous SNV #4 | Miscellaneous SV #1 |
|----------------|--------------------------|----------|-----|------|------|-------------------------|-------------------------|------------------|--------------|---------------|--------------|-----------------------|----------------------|---------------------------|----------------------|----------------------|---------------------|
| SJ.GG008_D     | discovery_#1             | 17       | F   | CX   | PA   | FGFR1 TK duplication    |                         |                  |              |               |              |                       | DSG1:p.N280Y         | FLT1:p.T48A & FLT1:p.L29I |                      |                      |                     |
| SJ.GG045_D     | discovery_#1             | 11       | M   | CX   | DA   | FGFR1 TK duplication    |                         |                  |              |               |              |                       |                      |                           |                      |                      |                     |
| SJ.GG006_D     | discovery_#1             | 1        | M   | CX   | OA   | FGFR1 TK duplication    |                         |                  |              |               |              |                       |                      |                           |                      |                      |                     |
| SJ.GG006_R     | discovery_#1             |          |     |      | OA   | FGFR1 TK duplication    |                         |                  |              |               |              |                       |                      |                           |                      |                      |                     |
| SJ.GG044_D     | discovery_#1             | 6        | F   | CX   | OA   | FGFR1 TK duplication    |                         |                  |              |               |              |                       |                      |                           |                      |                      |                     |
| SJ.GG003_D     | discovery_#1 & series #2 | 5        | F   | CX   | DA   | FGFR1 TK duplication    |                         |                  |              |               |              |                       |                      |                           |                      |                      |                     |
| SJ.GG050_D     | discovery_#1 & series #2 | 13       | F   | CX   | DNET | FGFR1 TK duplication    |                         |                  |              |               |              |                       |                      |                           |                      |                      |                     |
| SJ.GG049_D     | discovery_#1 & series #2 | 4        | M   | CX   | O    | FGFR1 TK duplication    |                         |                  |              |               |              |                       |                      |                           |                      |                      |                     |
| SJ.GG049_R     | discovery_#1 & series #2 |          |     |      | O    | FGFR1 TK duplication    |                         |                  |              |               |              |                       |                      |                           |                      |                      |                     |
| SJ.GG052_D     | discovery_#1 & series #2 | 5        | M   | CX   | O    | FGFR1 TK duplication    |                         |                  |              |               |              |                       |                      |                           |                      |                      |                     |
| SJ.GG051_D     | discovery_#1 & series #2 | 6        | F   | CX   | OA   | FGFR1 TK duplication    |                         |                  |              |               |              |                       |                      |                           |                      |                      |                     |
| SJ.GG01229_D1  | series #2                | 2        | M   | SC   | PA   | FGFR1 TK duplication    |                         |                  |              |               |              |                       |                      |                           |                      |                      |                     |
| SJ.GG010112_D1 | series #3                | 5        | M   | CX   | DA   | FGFR1 TK duplication    |                         |                  |              |               |              |                       |                      |                           |                      |                      |                     |
| SJ.GG018_D     | discovery_#1             | 15       | M   | DE   | PA   | FGFR1-TACCT             |                         |                  |              |               |              |                       | TMPP8:p.R6S          |                           |                      |                      |                     |
| SJ.GG01212_D1  | discovery_#1 & series #2 | 13       | M   | CX   | DA   | FGFR1-TACCT             |                         |                  |              |               |              |                       |                      |                           |                      |                      |                     |
| SJ.GG01264_D1  | discovery_#1 & series #2 | 2        | F   | CX   | OA   | FGFR1-TACCT             |                         |                  |              |               |              |                       |                      |                           |                      |                      |                     |
| SJ.GG01206_D1  | discovery_#1 & series #2 | 6        | M   | CX   | DA   | FGFR3-TACC3             |                         |                  |              |               |              |                       |                      |                           |                      |                      |                     |
| SJ.GG01259_D1  | series #2                | 14       | M   | CX   | OA   | FGFR1:p.N544K           |                         |                  | NF1:p.T653H  | KRAS:p.G12D   |              |                       |                      |                           |                      |                      |                     |
| SJ.GG010115_D1 | series #3                | 17       | M   | DE   | PA   | FGFR1:p.N544K           |                         |                  |              |               |              |                       |                      |                           |                      |                      |                     |
| SJ.GG01213_D1  | series #2                | 5        | F   | DE   | PA   | FGFR1:p.N544K & p.V559M |                         |                  |              |               |              |                       |                      |                           |                      |                      |                     |
| SJ.GG035_D     | discovery_#1             | 5        | F   | CX   | DA   |                         | MYB episome             |                  |              |               |              |                       | DCTN1:p.R149*        |                           |                      |                      |                     |
| SJ.GG040_D     | discovery_#1             | 8        | F   | CX   | DA   |                         | MYB episome             |                  |              |               |              |                       | MK167:p.R1998*       | SCN3A:p.A488S             |                      |                      |                     |
| SJ.GG054_D     | discovery_#1 & series #2 | 3        | M   | CX   | AG   |                         | MYB-ESR1                |                  |              |               |              |                       |                      |                           |                      |                      |                     |
| SJ.GG048_D     | discovery_#1             | 4        | F   | CX   | O    |                         | MYB-MAML2               |                  |              |               |              |                       |                      |                           |                      |                      |                     |
| SJ.GG055_D     | discovery_#1             | 5        | F   | CX   | DA   |                         | MYB-PCDHGA1             |                  |              |               |              |                       | RANBP9:p.P917L       |                           |                      |                      |                     |
| SJ.GG046_D     | discovery_#1             | 4        | F   | CX   | DA   |                         | MYB-PCDHGA1             |                  |              |               |              |                       |                      |                           |                      |                      |                     |
| SJ.GG055_D     | discovery_#1 & series #2 | 4        | M   | CX   | DA   |                         | MYB-PCDHGA1             |                  |              |               |              |                       |                      |                           |                      |                      |                     |
| SJ.GG047_D     | discovery_#1             | 11       | M   | CX   | AG   |                         | MYB-QKI                 |                  |              |               |              |                       |                      |                           |                      |                      |                     |
| SJ.GG033_D     | discovery_#1             | 9        | M   | CX   | DA   |                         | MYBL1 rearrangement     |                  |              |               |              |                       | ADAMTS9:p.G569A      |                           |                      |                      |                     |
| SJ.GG026_D     | discovery_#1             | 0.4      | M   | CX   | DIGG |                         |                         | FXR1-BRAF        |              |               |              |                       |                      |                           |                      |                      |                     |
| SJ.GG031_D     | discovery_#1             | 11       | F   | CX   | GG   |                         |                         | BRAF-MACF1       |              |               |              |                       |                      |                           |                      |                      |                     |
| SJ.GG001262_D1 | discovery_#1 & series #2 | 14       | M   | CX   | OA   |                         |                         | BRAF:p.G503>EYSG |              |               |              |                       |                      |                           |                      |                      |                     |
| SJ.GG01284_D1  | series #2                | 10       | F   | DE   | DA   |                         |                         | BRAF:p.V600E     |              |               | H3F3A:p.K27M |                       |                      |                           |                      |                      |                     |
| SJ.GG030_D     | discovery_#1             | 3        | M   | CX   | DA   |                         |                         | BRAF:p.V600E     |              |               |              |                       | ALDH18A1:p.I153V     |                           |                      |                      |                     |
| SJ.GG036_D     | discovery_#1             | 3        | M   | CX   | DA   |                         |                         | BRAF:p.V600E     |              |               |              |                       |                      |                           |                      |                      |                     |
| SJ.GG029_D     | discovery_#1             | 5        | M   | CX   | PA   |                         |                         | BRAF:p.V600E     |              |               |              |                       |                      |                           |                      |                      |                     |
| SJ.GG001281_D1 | series #2                | 3        | F   | CX   | DA   |                         |                         | BRAF:p.V600E     |              |               |              |                       |                      |                           |                      |                      |                     |
| SJ.GG001269_D1 | series #2                | 17       | F   | CB   | GG   |                         |                         | BRAF:p.V600E     |              |               |              |                       |                      |                           |                      |                      |                     |
| SJ.GG01271_D1  | series #2                | 15       | F   | CX   | GG   |                         |                         | BRAF:p.V600E     |              |               |              |                       |                      |                           |                      |                      |                     |
| SJ.GG001211_D1 | discovery_#1 & series #2 | 3        | M   | DE   | PA   |                         |                         | BRAF:p.V600E     |              |               |              |                       |                      |                           |                      |                      |                     |
| SJ.GG001243_D1 | series #2                | 12       | F   | DE   | PA   |                         |                         | BRAF:p.V600E     |              |               |              |                       |                      |                           |                      |                      |                     |
| SJ.GG001209_D1 | series #2                | 8        | M   | CX   | PXA  |                         |                         | BRAF:p.V600E     |              |               |              |                       |                      |                           |                      |                      |                     |
| SJ.GG001266_D1 | series #2                | 16       | F   | CX   | PXA  |                         |                         | BRAF:p.V600E     |              |               |              |                       |                      |                           |                      |                      |                     |
| SJ.GG001273_D1 | series #2                | 8        | F   | CX   | PXA  |                         |                         | BRAF:p.V600E     |              |               |              |                       |                      |                           |                      |                      |                     |
| SJ.GG001277_D1 | series #2                | 9        | F   | CX   | PXA  |                         |                         | BRAF:p.V600E     |              |               |              |                       |                      |                           |                      |                      |                     |
| SJ.GG010117_D1 | series #3                | 9        | M   | CX   | DA   |                         |                         | BRAF:p.V600E     |              |               |              |                       |                      |                           |                      |                      |                     |
| SJ.GG010124_D1 | series #3                | 8        | F   | BS   | GG   |                         |                         | BRAF:p.V600E     |              |               |              |                       |                      |                           |                      |                      |                     |
| SJ.GG010123_D1 | series #3                | 2        | M   | BS   | PA   |                         |                         | BRAF:p.V600E     |              |               |              |                       |                      |                           |                      |                      |                     |
| SJ.GG010133_D1 | series #3                | 13       | F   | DE   | PA   |                         |                         | BRAF:p.V600E     |              |               |              |                       |                      |                           |                      |                      |                     |
| SJ.GG010116_D1 | series #3                | 6        | F   | CX   | PXA  |                         |                         | BRAF:p.V600E     |              |               |              |                       |                      |                           |                      |                      |                     |
| SJ.GG010119_D1 | series #3                | 8        | M   | CX   | PXA  |                         |                         | BRAF:p.V600E     |              |               |              |                       |                      |                           |                      |                      |                     |
| SJ.GG010132_D1 | series #3                | 12       | F   | CX   | PXA  |                         |                         | BRAF:p.V600E     |              |               |              |                       |                      |                           |                      |                      |                     |
| SJ.GG001285_D1 | series #2                | 14       | F   | CX   | DA   |                         |                         | KIAA1549-BRAF    |              |               |              |                       |                      |                           |                      |                      |                     |
| SJ.GG015_D     | discovery_#1             | 10       | F   | CB   | PA   |                         |                         | KIAA1549-BRAF    |              |               |              |                       |                      |                           |                      |                      |                     |
| SJ.GG009_D     | discovery_#1             | 6        | M   | DE   | PA   |                         |                         | KIAA1549-BRAF    |              |               |              |                       |                      |                           |                      |                      |                     |
| SJ.GG042_D     | discovery_#1             | 9        | F   | CX   | PA   |                         |                         | KIAA1549-BRAF    |              |               |              |                       |                      |                           |                      |                      |                     |
| SJ.GG012_D     | discovery_#1             | 13       | M   | CB   | PA   |                         |                         | KIAA1549-BRAF    |              |               |              |                       |                      |                           |                      |                      |                     |
| SJ.GG024_D     | discovery_#1             | 3        | F   | BS   | PA   |                         |                         | KIAA1549-BRAF    |              |               |              |                       |                      |                           |                      |                      |                     |
| SJ.GG027_D     | discovery_#1             | 10       | F   | DE   | PA   |                         |                         | KIAA1549-BRAF    |              |               |              |                       |                      |                           |                      |                      |                     |
| SJ.GG004_D     | discovery_#1             | 0.5      | F   | DE   | PA   |                         |                         | KIAA1549-BRAF    |              |               |              |                       |                      |                           |                      |                      |                     |
| SJ.GG010_D     | discovery_#1             | 3        | M   | CX   | PA   |                         |                         | KIAA1549-BRAF    |              |               |              |                       |                      |                           |                      |                      |                     |
| SJ.GG001_D     | discovery_#1             | 4        | F   | CB   | PA   |                         |                         | KIAA1549-BRAF    |              |               |              |                       |                      |                           |                      |                      |                     |
| SJ.GG002_D     | discovery_#1             | 6        | M   | CB   | PA   |                         |                         | KIAA1549-BRAF    |              |               |              |                       |                      |                           |                      |                      |                     |
| SJ.GG003_D     | discovery_#1             | 1        | M   | DE   | PA   |                         |                         | KIAA1549-BRAF    |              |               |              |                       |                      |                           |                      |                      |                     |
| SJ.GG011_D     | discovery_#1             | 12       | F   | CB   | PA   |                         |                         | KIAA1549-BRAF    |              |               |              |                       |                      |                           |                      |                      |                     |
| SJ.GG013_D     | discovery_#1             | 7        | F   | CB   | PA   |                         |                         | KIAA1549-BRAF    |              |               |              |                       |                      |                           |                      |                      |                     |
| SJ.GG016_D     | discovery_#1             | 14       | M   | CX   | PA   |                         |                         | KIAA1549-BRAF    |              |               |              |                       |                      |                           |                      |                      |                     |
| SJ.GG020_D     | discovery_#1             | 5        | M   | CB   | PA   |                         |                         | KIAA1549-BRAF    |              |               |              |                       |                      |                           |                      |                      |                     |
| SJ.GG021_D     | discovery_#1             | 4        | M   | DE   | PA   |                         |                         | KIAA1549-BRAF    |              |               |              |                       |                      |                           |                      |                      |                     |
| SJ.GG025_D     | discovery_#1             | 5        | F   | DE   | PA   |                         |                         | KIAA1549-BRAF    |              |               |              |                       |                      |                           |                      |                      |                     |
| SJ.GG028_D     | discovery_#1             | 1        | F   | SC   | PA   |                         |                         | KIAA1549-BRAF    |              |               |              |                       |                      |                           |                      |                      |                     |
| SJ.GG032_D     | discovery_#1             | 9        | M   | CB   | PA   |                         |                         | KIAA1549-BRAF    |              |               |              |                       |                      |                           |                      |                      |                     |
| SJ.GG007_D     | discovery_#1             | 1        | M   | DE   | PMA  |                         |                         | KIAA1549-BRAF    |              |               |              |                       |                      |                           |                      |                      |                     |
| SJ.GG001280_D1 | series #2                | 13       | F   | BS   | GG   |                         |                         | KIAA1549-BRAF    |              |               |              |                       |                      |                           |                      |                      |                     |
| SJ.GG001202_D1 | series #2                | 18       | F   | CB   | PA   |                         |                         | KIAA1549-BRAF    |              |               |              |                       |                      |                           |                      |                      |                     |
| SJ.GG001203_D1 | series #2                | 5        | F   | BS   | PA   |                         |                         | KIAA1549-BRAF    |              |               |              |                       |                      |                           |                      |                      |                     |





|           |            |    |           |               |                       |           |              |    |    |   |    |       |          |                                             |                                              |         |                  |                  |
|-----------|------------|----|-----------|---------------|-----------------------|-----------|--------------|----|----|---|----|-------|----------|---------------------------------------------|----------------------------------------------|---------|------------------|------------------|
| H3F3A     | SJLGG037_D | 1  | 226252135 | MISSENSE      | K28M                  | 4504279   | NM_002107    | 24 | 67 | 0 | 23 | A     | T        | A/T                                         | GGCTACAAAAGCCGCTCGCA[AT]GAGTGGCCCTCTACTGGAG  | SOMATIC | VALID            | SangerSequencing |
| HUWE1     | SJLGG037_D | X  | 53590777  | SILENT        | E2345E                | 61676188  | NM_031407    | 16 | 26 | 0 | 16 | C     | T        | C/T                                         | ATCAGTCTCTCAGCTCATT[C/T]TCAACCTGGAGAGAAATAGA | SOMATIC | VALID            | MiSeq            |
| JPH2      | SJLGG037_D | 20 | 42740854  | UTR_3         | E6_UTR_3              | 21704281  | NM_020433    | 11 | 37 | 0 | 22 | A     | G        | A/G                                         | CACAGAAATGAAGGGAGGAC[A/G]GCGAGGTTCCCTCTGGCTC | SOMATIC | VALID            | MiSeq            |
| TBX18     | SJLGG037_D | 6  | 85444386  | UTR_3         | E8_UTR_3              | 122937456 | NM_001080508 | 9  | 63 | 0 | 44 | T     | C        | T/C                                         | ATACTCATTTGGTATCA[T/C]CTGAATGATCAACGGCAAG    | SOMATIC | VALID            | MiSeq            |
| C3orf90   | SJLGG038_D | 3  | 118865071 | FRAMESHIFT    | P12fs                 | 282847424 | NM_162539    | 13 | 64 | 0 | 29 | ----- | GGCTGAAC | -----GGC'CTGGCTGAAC[-----GGCTGAAC]CCTTGAACA | SOMATIC                                      | VALID   | SangerSequencing |                  |
| MKI67     | SJLGG040_D | 10 | 129904112 | NONSENSE      | R1998*                | 103472005 | NM_002417    | 9  | 47 | 0 | 45 | G     | A        | G/A                                         | CCCCAAGGATATCTTGGT[C/GA]TTCCTGGAGCTTGTGGGG   | SOMATIC | VALID            | SangerSequencing |
| MORC1     | SJLGG040_D | 3  | 108829638 | SPLICE_REGION | R40_E3splice_region   | 221625538 | NM_014429    | 12 | 64 | 0 | 48 | C     | G        | C/G                                         | AGCCCCTGCATCTCTGAA[A/G]AATACAAAATATATTTCT    | SOMATIC | VALID            | MiSeq            |
| NEBL      | SJLGG040_D | 10 | 21073603  | UTR_3         | E7_UTR_3              | 47087157  | NM_213569    | 19 | 57 | 0 | 41 | G     | T        | G/T                                         | CCAGCTTCGATCTGCTGACT[G/T]GTCTCTGTACATTTCTTC  | SOMATIC | VALID            | MiSeq            |
| SCN3A     | SJLGG040_D | 2  | 166003458 | MISSENSE      | A488S                 | 126362947 | NM_001081676 | 17 | 58 | 0 | 52 | C     | A        | C/A                                         | TTTGGAGCTCAACTTTGATG[C/A]TCTGGAAGACTTTCCAACA | SOMATIC | VALID            | SangerSequencing |
| SLC26A7   | SJLGG040_D | 8  | 92407399  | UTR_3         | E19_UTR_3             | 16306483  | NM_052832    | 16 | 59 | 1 | 54 | C     | A        | C/A                                         | TATGCTGGCATTTCACAA[C/A]TTTGGTTGTTAGATCCT     | SOMATIC | VALID            | MiSeq            |
| SLC30A8   | SJLGG040_D | 8  | 118187125 | UTR_3         | E11_UTR_3             | 64762489  | NM_173851    | 7  | 60 | 0 | 50 | G     | A        | G/A                                         | GTTTATATGGCAAAATGCA[A/G]AATCTACAGGGAGATT     | SOMATIC | VALID            | MiSeq            |
| ZNF493    | SJLGG040_D | 19 | 21590539  | UTR_5         | UTR_5                 | 115511042 | NM_175910    | 24 | 77 | 0 | 44 | A     | G        | A/G                                         | TCAATGACTGTGGTTTTT[A/G]GTGTAAAGTTATATGTTCC   | SOMATIC | VALID            | MiSeq            |
| CDK13     | SJLGG042_D | 7  | 40118378  | MISSENSE      | R986H                 | 145309302 | NM_003718    | 14 | 38 | 0 | 28 | G     | A        | G/A                                         | TGCCTGGATCCAGTAAG[C/GA]CTGCACTGCAACAGGCTC    | SOMATIC | VALID            | SangerSequencing |
| KIAA1033  | SJLGG042_D | 12 | 105516023 | SPLICE_REGION | A263_E10splice_region | 40018629  | NM_015275    | 9  | 52 | 0 | 42 | A     | T        | A/T                                         | GAATGATATCCAGTAAGT[A/T]GGTCTGTATCAGACTGTAAC  | SOMATIC | VALID            | MiSeq            |
| LOC678655 | SJLGG042_D | 12 | 6552721   | EXON          | E5_exon               | -1        | NR_015382    | 11 | 31 | 0 | 25 | G     | A        | G/A                                         | TTTACCACAACTGGAATG[C/GA]CTGGTACAGAAAAGTCTC   | SOMATIC | VALID            | MiSeq            |
| OTC       | SJLGG042_D | X  | 38267988  | SPLICE_REGION | G222_E7splice_region  | 38788445  | NM_000531    | 22 | 43 | 0 | 53 | C     | A        | C/A                                         | ATAAGATTAATCTTCT[C/A]CTTAGGGTATGAGCCGGA      | SOMATIC | VALID            | MiSeq            |
| RASL10B   | SJLGG042_D | 17 | 34068967  | UTR_3         | E4_UTR_3              | 15277321  | NM_033315    | 10 | 24 | 0 | 18 | T     | A        | T/A                                         | GAGGGGAGAAGGTTGAGCT[TA]CCGGCTCCAGGAGACCTC    | SOMATIC | VALID            | MiSeq            |
| ZMAT3     | SJLGG042_D | 3  | 178737580 | UTR_3         | E6_UTR_3              | 11968019  | NM_022470    | 10 | 35 | 0 | 37 | A     | T        | A/T                                         | CAATTAATAATTTGTC[C/A]TGTCTCTCGCTTAGCTGCA     | SOMATIC | VALID            | MiSeq            |

Column definition for tier 1 (extrapolate for tiers 2 & 3) listed below:

- A. GeneName: HUGO gene symbol
- B. Sample: name of the sample
- C. Chromosome: chromosome
- D. Position: chromosome position in hg19 coordinates.
- E. Class: classification based on amino acid change pattern. 'exon' refers to mutations in non-coding RNA genes; 'splice\_region' refers to mutations not directly affecting the canonical splice sites but located within 10bp of the canonical splice sites.
- F. AACChange: predicted amino acid change for the mutation
- G. ProteinGI: NCBI protein GI number
- H. mRNAAccession: RefSeq accession number
- I. # Mutant\_In\_Tumor: number of WGS reads containing mutant allele (tumor)
- J. # Total\_In\_Tumor: number of WGS reads covering the site (tumor)
- K. # Mutant\_In\_Normal: number of WGS reads containing mutant allele (normal)
- L. # Total\_In\_Normal: number of WGS reads covering the site (normal)
- M. # Mutant\_In\_Tumor\_Validation: number of reads containing mutant allele in 454 validation sequencing (tumor)
- N. # Total\_In\_Tumor\_Validation: number of reads covering the site in 454 validation sequencing (tumor)
- O. # Mutant\_In\_Normal\_Validation: number of reads containing mutant allele in 454 validation sequencing (normal)
- P. # Total\_In\_Normal\_Validation: number of reads covering the site in 454 validation sequencing (normal)
- Q. Reference Allele: the allele represented in the reference human genome. Reference allele is marked as '-' for an insertion.
- R. Non-reference Allele
- S. Genotype of the tumor sample
- T. Flanking: 20bp [reference allele/mutant allele] 20bp
- U. Origin: somatic or germline mutation
- V. Status: is this a putative mutation or a experimentally validated mutation
- W. Validation Method: one of 454 or MySEQ or Sanger sequencing



Supplementary Table 5b

Single nucleotide substitutions in conserved regions for tumors analyzed by WGS

| Name                      | SJQuality | Sample   | Chromosome | Position  | Mut Reads Tumor | Total Reads Tumor | Mut Reads Normal | Total Reads Normal | Reference Allele | Non-reference Allele | Flanking Region                                |
|---------------------------|-----------|----------|------------|-----------|-----------------|-------------------|------------------|--------------------|------------------|----------------------|------------------------------------------------|
| chr1_163776629_163776897  | SJHQ      | SJLGG001 | chr1       | 163776690 | 8               | 33                | 0                | 20                 | C                | T                    | GACAGGTACCCCGAGAAATTC[CT]GATAGATGCCTGACAGGCCA  |
| chr13_65191339_65191723   | SJHQ      | SJLGG001 | chr13      | 65191512  | 17              | 40                | 0                | 37                 | C                | G                    | TATGTCTGTAAACAGATGAT[CT]GCAAGTGATGAGGAGTGAAGG  |
| chr2_119191407_119191523  | SJHQ      | SJLGG001 | chr2       | 119191421 | 9               | 31                | 0                | 17                 | A                | G                    | GGGGGGGGAAAGGCAAGTGA[GA]GACGTGACGACATTTCTGAGCA |
| chr6_110157149_110157465  | SJHQ      | SJLGG001 | chr6       | 110157436 | 7               | 47                | 0                | 44                 | G                | T                    | CCTTTTGAATCATTGTTTCA[CT]GTCATTAACATTTGTGTAA    |
| chrX_128461194_128461326  | SJHQ      | SJLGG001 | chrX       | 128461258 | 18              | 44                | 0                | 35                 | C                | T                    | GTCCACCCATTGGAACATCA[CT]TTCCCTGCAAAATCTTTGCT   |
| chrX_129164032_129164239  | SJHQ      | SJLGG001 | chrX       | 129164182 | 8               | 51                | 0                | 34                 | G                | A                    | ATAACCATAAAGTCTCC[CT]GACAGGTTGCTGTGCATCATTTG   |
| V\$CEBP_C                 | SJHQ      | SJLGG001 | chr21      | 24762805  | 13              | 54                | 0                | 37                 | G                | A                    | CAACTGAAGTAAATCTGT[CT]GAAATGACCCATGAAGCTTTG    |
| chr7_69563014_69563545    | SJHQ      | SJLGG002 | chr7       | 69563511  | 15              | 68                | 0                | 42                 | G                | C                    | GCCATGCAGCTGTGCCATG[CT]TAGCTGTGGGTACCCGGTG     |
| chrX_73381103_73381237    | SJHQ      | SJLGG002 | chrX       | 73381138  | 17              | 28                | 0                | 14                 | C                | A                    | ATGTTCCCACTTTCTGT[CT]GACAGCTTAATGTGCAGAGG      |
| V\$POU3F2_01              | SJHQ      | SJLGG003 | chr13      | 40854817  | 14              | 52                | 0                | 40                 | C                | T                    | TAATAAAATAATGATGA[CT]GAATAAAATAAATAAACAAGA     |
| V\$RORA1_01               | SJHQ      | SJLGG003 | chr2       | 232983699 | 6               | 45                | 0                | 39                 | C                | T                    | CCTTAATCACTTGGTATG[CT]TCTCTTTTCAGGTACACACC     |
| chr5_167231777_167231877  | SJHQ      | SJLGG004 | chr5       | 167231769 | 10              | 49                | 0                | 32                 | G                | T                    | ATCAGCCGATGGCATCAAG[CT]GACAGCTTAATGTGCAGAGG    |
| chrX_139380963_139381915  | SJHQ      | SJLGG004 | chrX       | 139381840 | 12              | 42                | 0                | 26                 | C                | A                    | CATTATCTTACGTAGGAA[CT]GATTCATCTGGTGTGTTGTAAC   |
| chr6_135516249_135516393  | SJHQ      | SJLGG005 | chr6       | 135516392 | 13              | 61                | 0                | 32                 | G                | C                    | TCTGTTTCTAACCCAGT[CT]GATTCATCTGATCTCACTGTC     |
| chr3_87122977_87123456    | SJHQ      | SJLGG007 | chr3       | 87123426  | 12              | 83                | 0                | 38                 | A                | T                    | ATCATTAATAAATAATCATA[AT]GACAAACAAAATGTCAATT    |
| chr3_90190823_90191161    | SJHQ      | SJLGG007 | chr3       | 90191138  | 8               | 47                | 0                | 40                 | C                | T                    | AGCTCCCTGTACACTG[CT]GACAGGGGGTGGAAAGAGTA       |
| chr5_166075134_166075254  | SJHQ      | SJLGG007 | chr5       | 166075151 | 17              | 77                | 0                | 31                 | A                | G                    | GCATTACAGACTTTTACCT[AT]GACATGAAGAATGCTCAAG     |
| chr10_111188977_111189105 | SJHQ      | SJLGG008 | chr10      | 111189059 | 10              | 53                | 0                | 38                 | A                | C                    | CAAGCCTTCCACACTGAA[AT]GACATTTACAGCTCTCTGAG     |
| chr11_78521249_78521381   | SJHQ      | SJLGG008 | chr11      | 78521250  | 21              | 52                | 0                | 28                 | C                | G                    | ACACAAGGACACGCAATG[CT]GCTTCCACAGAGAAACAGAA     |
| chr11_92422575_92422678   | SJHQ      | SJLGG008 | chr11      | 92422597  | 16              | 62                | 0                | 33                 | C                | T                    | TAATAGCACCTCAAGTGT[CT]ATCAATTAACGACATCCT       |
| chr12_86147258_86147417   | SJHQ      | SJLGG008 | chr12      | 86147415  | 8               | 50                | 0                | 40                 | T                | C                    | AATAAATGAATCATTGTT[CT]ATTATACAATAAATAAAGA      |
| chr4_80461441_80461618    | SJHQ      | SJLGG008 | chr4       | 80461513  | 14              | 40                | 0                | 39                 | T                | C                    | GTGGCTGAAATCTGCAAGT[CT]GATAAAGCATCAGATGCTGT    |
| chr8_29886831_29886955    | SJHQ      | SJLGG008 | chr8       | 29886830  | 18              | 59                | 0                | 36                 | G                | C                    | TGGCATACTTTCTCTGA[CT]GACATGATGAAGATGAGC        |
| chr8_38515478_38515681    | SJHQ      | SJLGG008 | chr8       | 38515624  | 9               | 60                | 0                | 30                 | T                | C                    | GGAGCCAGGGGCAATGAA[CT]ATAACAAGCATTTTTTACA      |
| chrX_78020252_78020354    | SJHQ      | SJLGG008 | chrX       | 78020243  | 8               | 52                | 0                | 44                 | G                | A                    | AATGGACTCAGTGTCT[CT]GACAGGCAAACTTTTGGAAA       |
| CpG_DEPTOR_0              | SJHQ      | SJLGG008 | chr8       | 120885289 | 10              | 29                | 0                | 21                 | G                | A                    | TAGCAGCCGCCCGCCAGT[CT]ATTTATATTTCTCCATCGG      |
| CpG_PRKD1_0               | SJHQ      | SJLGG008 | chr14      | 30396237  | 4               | 12                | 0                | 18                 | T                | C                    | ACTGGAGAGAAATCGGTAA[CT]AGAGGAAGATGGGCGAGAG     |
| V\$HEN1_02                | SJHQ      | SJLGG008 | chr15      | 93153494  | 5               | 34                | 0                | 38                 | C                | T                    | GGCCCTCGTTTACAGGCT[CT]CCGTGGCAGCAGCTGCCTT      |
| V\$PAX4_02                | SJHQ      | SJLGG008 | chrX       | 86873968  | 7               | 53                | 0                | 50                 | T                | C                    | AGGTGTAATTTTAAATGT[CT]GATGATGATGAAGATGAGC      |
| chr10_95083974_95084199   | SJHQ      | SJLGG009 | chr10      | 95083998  | 9               | 60                | 0                | 49                 | T                | A                    | TTTTTGAGTGTCTGTAGAC[CT]ACTGCTTCCAGCAAAAACA     |
| chr13_88940658_88941046   | SJHQ      | SJLGG009 | chr13      | 88940805  | 7               | 46                | 0                | 35                 | T                | C                    | CAGCTGTAGTACTTCATA[CT]TGCCCTCCCAAGACTGAT       |
| chr2_144827672_144828232  | SJHQ      | SJLGG009 | chr2       | 144828206 | 12              | 49                | 0                | 41                 | T                | C                    | AGTGAGCTGTGTAAACAAT[CT]GACATGATGATGAGGAGCA     |
| chr5_166713874_166714566  | SJHQ      | SJLGG009 | chr5       | 166713910 | 8               | 56                | 0                | 32                 | C                | A                    | TGTTTGTCTTTTCCCTC[CT]GATGATAAATGAGGTTG         |
| V\$RFX1_02                | SJHQ      | SJLGG009 | chr19      | 51017982  | 8               | 26                | 0                | 32                 | T                | C                    | CCCAGCCACCACTGGTACC[CT]GCTGCGAGTGTTCATGGCA     |
| CpG_WDR85_0               | SJHQ      | SJLGG010 | chr9       | 140473002 | 7               | 29                | 0                | 32                 | G                | C                    | ATCCCTTCTTACTTCTGA[CT]GACATGATGATGAGGCTTTCG    |
| chr12_119895523_119895791 | SJHQ      | SJLGG011 | chr12      | 119895528 | 6               | 35                | 0                | 30                 | G                | A                    | ACTTGTGTGGTGGCGGGG[GA]JAGAATAACAACACATCCT      |
| chr1_3057065_3057211      | SJHQ      | SJLGG011 | chr1       | 3057175   | 18              | 44                | 0                | 27                 | G                | A                    | GGCTATTATTTTTCAGAG[CT]GATATTTTACCTCAGAGCTG     |
| chr16_64235741_64235891   | SJHQ      | SJLGG011 | chr16      | 64235802  | 7               | 47                | 0                | 35                 | A                | T                    | TGTGACTCTTTTAACTAA[CT]GGTCTCCCAAGCTTGTGCC      |
| chr8_21480877_21481184    | SJHQ      | SJLGG011 | chr8       | 21481113  | 23              | 52                | 0                | 31                 | G                | A                    | GGAAATACAGACAGCTT[GA]CTGAAAGTGAAGTTTCCACC      |
| chr9_120820403_120820726  | SJHQ      | SJLGG011 | chr9       | 120820645 | 22              | 48                | 1                | 24                 | G                | G                    | GGAAAGAAAATACCCAA[AT]GAGGTTGATGACCTGGAATG      |
| V\$HNF1_C                 | SJHQ      | SJLGG011 | chr6       | 92991729  | 5               | 26                | 0                | 30                 | G                | C                    | TCAAATCAGAATGGGAAA[AT]GACATGATGATGATGATGAG     |
| V\$SNKX22_01              | SJHQ      | SJLGG011 | chr14      | 57253200  | 8               | 33                | 0                | 30                 | A                | T                    | GGCTTTTCCAAATGCATATA[AT]TAAACATTAAGTGTCTCT     |
| chr10_120001038_120001184 | SJHQ      | SJLGG012 | chr10      | 120001108 | 11              | 38                | 0                | 28                 | G                | G                    | GAAGAACCCTGAGGAAAG[AT]GAGCCACAGCTTTTCCAAAA     |
| chr12_63149021_63150071   | SJHQ      | SJLGG012 | chr12      | 63149804  | 8               | 41                | 0                | 32                 | C                | T                    | AAGGTGGTGAAGCAGAGCT[CT]GAGACCCCTCAGGGGACATC    |
| chr2_156987724_156988147  | SJHQ      | SJLGG012 | chr2       | 156987906 | 13              | 43                | 0                | 39                 | G                | C                    | GGTACTTATATACAAGATA[CT]GATGAAGGGGAAAAAAGGAG    |
| chr8_31941899_31942035    | SJHQ      | SJLGG012 | chr8       | 31942039  | 10              | 41                | 0                | 41                 | G                | A                    | CTTCCCATGGTTTATTTAA[CT]GATGATGATGATGATGATG     |
| chrX_128382209_128382761  | SJHQ      | SJLGG012 | chrX       | 128382293 | 14              | 24                | 0                | 13                 | C                | T                    | AGGGCCAAAGCTGCAAGT[CT]GCTTCAATGAAACATTTCT      |
| CpG_NELF_0                | SJHQ      | SJLGG012 | chr9       | 140349840 | 6               | 25                | 0                | 27                 | G                | T                    | GGGACAGTGGTGGCAGCA[CT]GGCCCGCAGGGGCTGTGGG      |
| V\$LMQ2COM_02             | SJHQ      | SJLGG012 | chr7       | 110082825 | 14              | 48                | 0                | 37                 | G                | A                    | TTTTAAAAAGGAACCTC[CT]GATCAGTGTTCCTTCTCAGT      |
| V\$PXB1_02                | SJHQ      | SJLGG012 | chr12      | 60365511  | 22              | 62                | 0                | 39                 | C                | T                    | CTTTGATGATATTTTAA[CT]GTGAGCAAACTGATCACTCA      |
| chr12_110522399_110522515 | SJHQ      | SJLGG015 | chr12      | 110522459 | 7               | 58                | 0                | 39                 | A                | G                    | GGCCCAACAGGGAAAAAG[GA]GATTCGGGGTGGGTAAGA       |
| chr8_74363813_74364286    | SJHQ      | SJLGG015 | chr8       | 74363941  | 16              | 65                | 0                | 37                 | G                | C                    | TGACAGACCTTGTGGAGG[GA]GAAAGGGGCTTTTGTGCAG      |
| chr6_44095961_44096359    | SJHQ      | SJLGG016 | chr6       | 44096345  | 5               | 11                | 0                | 14                 | C                | G                    | TGGTCCCTGGGCAAGGCT[CT]GAGCCCTCAGGGGCAAGCCT     |
| chr2_174440927_174441088  | SJHQ      | SJLGG018 | chr2       | 174441042 | 6               | 37                | 0                | 29                 | T                | C                    | AGCAAAAGTCCACCTT[CT]GATTCCTGTACACTTCTT         |
| chr4_22711471_22712394    | SJHQ      | SJLGG018 | chr4       | 22711892  | 19              | 52                | 0                | 47                 | C                | T                    | GAAGAAGTCAATAGTTT[CT]GATGATTTACAGTAGGTTA       |
| chr5_73737453_73737656    | SJHQ      | SJLGG018 | chr5       | 73737617  | 14              | 43                | 0                | 30                 | G                | A                    | AGCTTGTGCCAAGGAGG[CT]GATGATGATGATGATGATGATG    |
| chr7_41505176_41505538    | SJHQ      | SJLGG018 | chr7       | 41505476  | 4               | 29                | 0                | 33                 | C                | T                    | ATGTGACATGAAAGTTA[CT]GGACTGTGGGCAATTTTAC       |
| CpG_ORQ3_Q3_600694        | SJHQ      | SJLGG018 | chr14      | 19614672  | 10              | 16                | 0                | 16                 | G                | A                    | TGGCTGCAGCCCGACTG[CT]GAGTGTGGAGGCTTCTGAG       |
| chr10_20466218_20466360   | SJHQ      | SJLGG020 | chr10      | 20466238  | 5               | 16                | 0                | 15                 | G                | A                    | CTGTTGCTTGGTGAAT[CT]GATTTCTTCTCTCCCTGAGCA      |
| chr5_84012887_84013205    | SJHQ      | SJLGG020 | chr5       | 84013146  | 19              | 60                | 0                | 45                 | G                | A                    | CATTTCTGTAGAGGATAG[CT]GATTTATCAAGTAGTGA        |
| chr5_87030133_87030240    | SJHQ      | SJLGG020 | chr5       | 87030225  | 15              | 34                | 0                | 38                 | T                | C                    | AAAAGTTTTAGGATG[CT]GATTTATCTTGAATTCATTC        |
| chr7_139376443_139376570  | SJHQ      | SJLGG020 | chr7       | 139376550 | 14              | 73                | 0                | 25                 | G                | T                    | TGAAACGAGCTGCTGATG[CT]GATTAATGAACTGATACACA     |
| CpG_CHRNA4_0              | SJHQ      | SJLGG020 | chr20      | 61979359  | 15              | 30                | 0                | 24                 | G                | A                    | GGGGACGGCCCGCCTC[CT]GATCCCTTCTGATGCTGCTT       |
| CpG_MLN_171812            | SJHQ      | SJLGG020 | chr6       | 33944016  | 9               | 35                | 0                | 18                 | C                | T                    | CAGGATGGGGTCCCTC[CT]GAAAGGCTGGCTTCTCAT         |
| CpG_XKR5_0                | SJHQ      | SJLGG020 | chr8       | 6692247   | 9               | 27                | 0                | 17                 | G                | A                    | GTTCCGAGGAGCCCGG[CT]GATGATGATGATGATGATGATG     |
| CpG_XKR5_0                | SJHQ      | SJLGG020 | chr8       | 6692248   | 9               | 27                | 0                | 16                 | G                | C                    | CTTCCGAGGAGCCCGG[CT]GATGATGATGATGATGATGATG     |
| chr7_140419082_140419833  | SJHQ      | SJLGG021 | chr7       | 140419500 | 8               | 62                | 0                | 53                 | T                | C                    | TCCATTTGACTGAAAATAA[CT]GATCTTTTATGAATGAA       |
| V\$FOX3_01                | SJHQ      | SJLGG021 | chr13      | 67639147  | 13              | 57                | 0                | 43                 | T                | C                    | TGAATGAACTAAGGATTA[CT]GATGATTAAGAGAGATGCC      |
| CpG_FAM19A5_0             | SJHQ      | SJLGG022 | chr22      | 49141136  | 8               | 29                | 0                | 25                 | A                | G                    | CGTCCGCGCTGGCTG[CT]GATGATGATGATGATGATGATG      |
| CpG_RIMBP2_123439         | SJHQ      | SJLGG022 | chr12      | 131125952 | 6               | 37                | 0                | 26                 | G                | A                    | ATGTTGACTGACCCGACT[CT]GAGCCGACATCGGGCTGGA      |
| chr11_2724618_2725033     | SJHQ      | SJLGG024 | chr11      | 2724726   | 15              | 47                | 0                | 26                 | G                | G                    | TGTGACCCGAGAGCAGCA[CT]GACACACGCACTCACAGCT      |
| chr4_65758897_65759345    | SJHQ      | SJLGG024 | chr4       | 65759237  | 7               | 67                | 0                | 46                 | G                | C                    | TCGTGATATGAACCTTT[CT]GATGATGATGATGATGATGATG    |
| chr7_140481193_140481290  | SJHQ      | SJLGG024 | chr7       | 140481226 | 19              | 57                | 0                | 41                 | T                | G                    | TATTTCCCAATTTTGT[CT]GAGAACTTTTGGAGGAGTCC       |
| chrX_54501045_54501170    | SJHQ      | SJLGG024 | chrX       | 54501155  | 14              | 45                | 0                | 40                 | C                | T                    | CACCTGGAGGTTGGCAGG[CT]GAGGATGTTGTTGGAGAGAC     |
| V\$S8_01                  | SJHQ      | SJLGG024 | chr14      | 84592290  | 17              | 54                | 0                | 34                 | C                | A                    | TGAGATCTCGGCTGAAAT[CT]GATGATGATGATGATGATG      |
| chrX_117851769_117851897  | SJHQ      | SJLGG025 | chrX       | 117851843 | 14              | 57                | 0                | 52                 | C                | A                    | CACCAAAAACAGAAAGCA[CT]GATGATGATGATGATGATG      |
| chr2_7845179_7845522      | SJHQ      | SJLGG027 | chr2       | 7845287   | 19              | 70                | 0                | 34                 | G                | C                    | ATGAATATAAATTTATTT[CT]GATTTTATGCTGCTTATTA      |
| chr6_43045726_43045833    | SJHQ      | SJLGG027 | chr6       | 43045816  | 16              | 43                | 0                | 35                 | T                | T                    | TGCTCGTTGGTGGTGGT[CT]GATGATGATGATGATGATG       |
| chr7_96517972_96518073    | SJHQ      | SJLGG027 | chr7       | 96518026  | 21              | 55                | 0                | 46                 | T                | C                    | TTTTTGCTTCTGAAGT[CT]GATGATGATGATGATGATGATG     |
| chrX_114882154_114882358  | SJHQ      | SJLGG027 | chrX       | 114882202 | 10              | 46                | 0                | 40                 | T                | A                    | AATCTCAGATTTGTTCT[CT]GATGATGATGATGATGATG       |



**Supplementary Table 5c**  
**Single nucleotide substitutions in non-repetitive regions for tumors analyzed by WGS**

| SJQuality | Sample   | Chromosome | Position  | Mut Reads Tumor | Total Reads Tumor | Mut Reads Normal | Total Reads Normal | Reference Allele | Non-reference Allele | Flanking Region                                  |
|-----------|----------|------------|-----------|-----------------|-------------------|------------------|--------------------|------------------|----------------------|--------------------------------------------------|
| SJHQ      | SJLGG001 | chr11      | 21673456  | 18              | 42                | 0                | 35                 | G                | T                    | ACTTGCCCGGGATGTTCTT[G/T]AATTTTTTCTATTCTTGTG      |
| SJHQ      | SJLGG001 | chr1       | 143651193 | 20              | 34                | 0                | 27                 | G                | A                    | TATGATGGTTAACTGAGAC[G/A]TGTGCCAGGAAGTTAGGGT      |
| SJHQ      | SJLGG001 | chr1       | 1558087   | 13              | 38                | 0                | 23                 | C                | T                    | CCTGCCTCTGCTCGAGTATC[C/T]GGCCCTCTGCTGAGTGCCCT    |
| SJHQ      | SJLGG001 | chr12      | 101416249 | 11              | 58                | 0                | 32                 | G                | A                    | GAACCACTCATAACATTTG[C/G]AJTACTGAATAATTTAAATGTT   |
| SJHQ      | SJLGG001 | chr12      | 3118755   | 21              | 33                | 0                | 27                 | G                | A                    | CCCTACTTCATTACCCACCG[G/A]JTGAGTACTGACATGACCCGAGA |
| SJHQ      | SJLGG001 | chr13      | 19739594  | 11              | 34                | 0                | 25                 | C                | T                    | CCAATGACATATAAGCTAGAC[C/T]GGGTGGGGCTAGATGGGTGG   |
| SJHQ      | SJLGG001 | chr13      | 28902039  | 12              | 26                | 0                | 25                 | G                | A                    | CAGACCCTTGCAGTAGAGC[G/A]GCTCTGGTTACTGTCCACAC     |
| SJHQ      | SJLGG001 | chr13      | 57352502  | 10              | 47                | 0                | 47                 | A                | T                    | CAAGGATCAGATCTGCAATG[A/T]ATTATTTTCTGACTTACCCC    |
| SJHQ      | SJLGG001 | chr13      | 57352532  | 10              | 49                | 0                | 44                 | A                | T                    | TGACTTACCCTGCCCACT[G/T]JGAGTCTGGCATAATTTTTA      |
| SJHQ      | SJLGG001 | chr13      | 93058699  | 18              | 47                | 0                | 23                 | C                | T                    | TCTCCACTACCAAAATA[A/C]TGTGGAGCTATATCAACTGG       |
| SJHQ      | SJLGG001 | chr15      | 71248469  | 13              | 47                | 0                | 28                 | T                | C                    | TAGGGGAGGAAAATTTCTAA[T/C]TGGAGAAAATTTGACTGATAT   |
| SJHQ      | SJLGG001 | chr15      | 77612936  | 10              | 43                | 0                | 24                 | A                | G                    | GGAGTTAAATGACCTTATCT[A/G]GAGCAGTAACTGAGCCCTCA    |
| SJHQ      | SJLGG001 | chr1       | 80464092  | 6               | 36                | 0                | 30                 | T                | C                    | CCATTTGACCAAAAAGGATG[C/T]AAAATATAAGATCAGATGA     |
| SJHQ      | SJLGG001 | chr18      | 7528567   | 7               | 51                | 0                | 31                 | C                | T                    | TCTATCTTACTTTTAAATTT[C/T]CATTCAAGTCCAATGGATTT    |
| SJHQ      | SJLGG001 | chr1       | 97269938  | 14              | 45                | 0                | 29                 | A                | T                    | CAAGTGTGAGTTTATGAAG[A/T]GATAGCACTTGGCGAAAAAA     |
| SJHQ      | SJLGG001 | chr2       | 192071618 | 6               | 28                | 0                | 31                 | C                | T                    | TTCCATCCTCTTCATGAA[C/T]GGCCCTTTTTCCTTAGCT        |
| SJHQ      | SJLGG001 | chr22      | 49987482  | 17              | 40                | 0                | 26                 | C                | T                    | CCTTGAAGCCCAAGAGGAGCT[C/T]ACCGCTCCAGGCAGCAGAAG   |
| SJHQ      | SJLGG001 | chr2       | 40734424  | 13              | 39                | 0                | 20                 | C                | T                    | ACATTTCAACATACGTTGAT[C/T]GAAAATGATTAATGATA       |
| SJHQ      | SJLGG001 | chr2       | 47584051  | 27              | 67                | 0                | 40                 | G                | A                    | TTATAGTTTGATAATCATT[G/A]AAACAGAATCATTTTATATC     |
| SJHQ      | SJLGG001 | chr3       | 111249777 | 10              | 46                | 0                | 21                 | T                | A                    | GATTCACACTGTGGGAAAC[T/A]TGTGCCATCCCAGGATGGCT     |
| SJHQ      | SJLGG001 | chr3       | 56321102  | 15              | 34                | 0                | 30                 | C                | G                    | CCCTCAACCTACATGCCTAA[C/G]TGGAAACCCAAATAAAGTAG    |
| SJHQ      | SJLGG001 | chr4       | 130446492 | 12              | 40                | 0                | 35                 | G                | C                    | ACTAATGGTGAATTAATCC[T/G]C/CACCAAAAGCAGACGTATTT   |
| SJHQ      | SJLGG001 | chr4       | 136490997 | 17              | 57                | 0                | 23                 | G                | C                    | TTTCCACAGAGGTATAGTTT[G/C]TTCAGCTCTATCTTGACAAA    |
| SJHQ      | SJLGG001 | chr4       | 141642990 | 20              | 54                | 0                | 36                 | G                | A                    | TCTCCTGTGACTGAATGCC[G/A]TCTTGATAACTTGCCCAACA     |
| SJHQ      | SJLGG001 | chr4       | 181804435 | 16              | 42                | 0                | 35                 | C                | T                    | ATTTCAATTTAGTAGAAACA[C/T]TGAACCTGTTCTTACCAACT    |
| SJHQ      | SJLGG001 | chr4       | 30144548  | 12              | 50                | 0                | 35                 | T                | C                    | TAAACTCCAGGGTTTGTAA[T/C]ATTATAATTTGGTTCTTAC      |
| SJHQ      | SJLGG001 | chr4       | 35339778  | 16              | 55                | 0                | 49                 | A                | T                    | AGATTAAGAGCTTTTAAATA[A/T]ACTGTTTTATGTAGAGATTG    |
| SJHQ      | SJLGG001 | chr4       | 52996906  | 20              | 63                | 0                | 43                 | G                | A                    | TTGAGCATGTATCAATGAAC[G/A]TTTATTCAGAATGAGCTACA    |
| SJHQ      | SJLGG001 | chr4       | 85529722  | 12              | 43                | 0                | 22                 | C                | T                    | CTTCCATCTGTCTTATCCT[C/T]JAGTGCTGACCTCTTAGGTA     |
| SJHQ      | SJLGG001 | chr5       | 129650866 | 20              | 47                | 0                | 32                 | G                | A                    | AATTCCATTGTTATCTCAC[G/A]TTTATGATACATGACATGCA     |
| SJHQ      | SJLGG001 | chr6       | 165850000 | 8               | 39                | 0                | 39                 | A                | G                    | GCTTTAACCTGGGTACTTG[A/G]AATTAATAACAATATAAAT      |
| SJHQ      | SJLGG001 | chr6       | 49807768  | 6               | 42                | 0                | 33                 | G                | T                    | AGACTTATGTGTTAATCTAA[G/T]AAATACATGTAGCTGAAGGA    |
| SJHQ      | SJLGG001 | chr6       | 64126231  | 10              | 39                | 0                | 29                 | T                | C                    | TGGTCCAAGGAAACATCAGAT[C/G]GCATCTGAGGGCCAACTGA    |
| SJHQ      | SJLGG001 | chr6       | 6966316   | 11              | 68                | 0                | 32                 | G                | A                    | TAATTTTAGTTAAAAATGC[G/A]TAGCCTTCCCAAGTACATTA     |
| SJHQ      | SJLGG001 | chr7       | 138558520 | 16              | 56                | 0                | 25                 | G                | T                    | CACAGACTGCAACAGAGGA[G/T]JGGATGACACAAACCCCTGGGC   |
| SJHQ      | SJLGG001 | chr7       | 138558525 | 16              | 59                | 0                | 21                 | T                | A                    | ACTGCAACCAGAGGAGGGGA[T/A]GCACAAACCCCTGGGCCACTC   |
| SJHQ      | SJLGG001 | chr8       | 24049616  | 12              | 39                | 0                | 15                 | T                | C                    | GAGAGCTTTGGGGGAATTT[C/G]C/CAGCAGGACTCCTTGCATGA   |
| SJHQ      | SJLGG001 | chr9       | 12908564  | 23              | 50                | 0                | 43                 | G                | A                    | CCTTTTCTTTTAAACTT[G/A]GAGTCCAAGAGCTTTTCATC       |
| SJHQ      | SJLGG001 | chr9       | 32348319  | 18              | 50                | 0                | 24                 | A                | T                    | TAATGGGTCTTTAAAAAA[A/T]TTCGCACATGACAAAATAAA      |
| SJHQ      | SJLGG001 | chrX       | 113932183 | 11              | 37                | 0                | 31                 | T                | A                    | TCATTACTTCTTCTGTACC[T/A]CTTACATTAACGTATTGAC      |
| SJHQ      | SJLGG001 | chrX       | 117065405 | 16              | 45                | 0                | 22                 | A                | T                    | GCCTCCAGGCTTAAAGATG[A/T]JAGGGATGTTTCAACTGGC      |
| SJHQ      | SJLGG001 | chrX       | 142936981 | 18              | 54                | 0                | 35                 | A                | G                    | TAAATATACATATAGTAT[A/G]TATTATCTTGAAGTTGTAA       |
| SJHQ      | SJLGG001 | chrX       | 5116551   | 7               | 50                | 0                | 40                 | G                | A                    | GACGACTCTGAATATAAT[G/G]AAATATTAGAAGTGAACAT       |
| SJHQ      | SJLGG002 | chr1       | 104340801 | 16              | 54                | 0                | 45                 | A                | G                    | GTTCTCATATATACTTCTT[A/G]CAAAATCCCTAAATATGCCCT    |
| SJHQ      | SJLGG002 | chr1       | 185755522 | 8               | 51                | 0                | 28                 | A                | T                    | TCTGTCAATTTATGCTTTTGC[A/T]JGGGAGCTCATTATTGGCCA   |
| SJHQ      | SJLGG002 | chr12      | 14035275  | 12              | 42                | 0                | 24                 | G                | A                    | TGGAATTTGTCTGGATAAA[C/G]AAGAGCCACCAAGCAGGAAT     |
| SJHQ      | SJLGG002 | chr1       | 227141495 | 19              | 45                | 0                | 25                 | G                | T                    | ATAGAAGCCGGGACTTGCC[C/G]TJAGATGTTTGAGTGATGCTCC   |
| SJHQ      | SJLGG002 | chr12      | 27780321  | 21              | 64                | 0                | 30                 | G                | A                    | TGACCACAGAATACTGTGG[C/G]AJTCTACCAGCATAGTCAAT     |
| SJHQ      | SJLGG002 | chr12      | 29328912  | 16              | 77                | 0                | 44                 | A                | T                    | AAAATAAGCAAAATACAA[A/T]ATTTAATATCAAAAGTAAAA      |
| SJHQ      | SJLGG002 | chr13      | 19910677  | 22              | 60                | 0                | 39                 | C                | T                    | CCAACACACTTGGTATAAT[A/C]TJTACACATTCATATTTGAA     |
| SJHQ      | SJLGG002 | chr15      | 22334208  | 14              | 124               | 0                | 83                 | C                | T                    | TATTACCTCTGAGTCTCAA[C/T]ATGTTTGAGGAATAAATTTA     |
| SJHQ      | SJLGG002 | chr16      | 62621802  | 12              | 72                | 0                | 26                 | T                | C                    | CTTTTGGCTAACCCCTAA[A/T]CTGGATGTCAGTAGGAACA       |
| SJHQ      | SJLGG002 | chr16      | 63361516  | 8               | 52                | 0                | 39                 | T                | C                    | CATGTAACATAATTTCTGT[T/C]AATCAATGCTTGCAGGAG       |
| SJHQ      | SJLGG002 | chr17      | 45794564  | 17              | 46                | 0                | 23                 | C                | T                    | GTCTTCTACCCGTTCCCTCC[C/T]TTGAGCAAGAGGCCTGCAGG    |
| SJHQ      | SJLGG002 | chr1       | 81492614  | 15              | 66                | 0                | 28                 | T                | C                    | ATCAGGCTTGTCTCTGTTG[T/C]ACAGTGATAAATAAGACAGG     |
| SJHQ      | SJLGG002 | chr20      | 3217708   | 12              | 33                | 0                | 26                 | T                | C                    | AGGTCACCTCATGGGCTAGG[C/T]ACAGGACACAGCCCTGAAGCC   |
| SJHQ      | SJLGG002 | chr2       | 124534334 | 13              | 71                | 0                | 44                 | C                | A                    | GAAAAATAACTCAAAGAT[C/A]TCAATAATCAGAAGTTTCTA      |
| SJHQ      | SJLGG002 | chr2       | 135281056 | 18              | 58                | 0                | 27                 | T                | A                    | AGAAAAATGCTTAAAAAGC[T/A]ATTACTGATGCTTTTCAAAA     |
| SJHQ      | SJLGG002 | chr2       | 141720117 | 21              | 68                | 0                | 34                 | C                | G                    | ACGGTGTCTGTAGCTTCTT[C/G]TCTGAAGAGGAGGTTGGCTC     |
| SJHQ      | SJLGG002 | chr2       | 168760734 | 19              | 50                | 0                | 31                 | T                | G                    | TTCTTTTCTTACAGGTTT[T/G]GATGGCTTTGGTTTCAAGG       |
| SJHQ      | SJLGG002 | chr2       | 180724821 | 9               | 49                | 0                | 30                 | A                | G                    | TTTGTCTTCTATAGAAC[A/G]TCTTTTGTACTACATCTTG        |
| SJHQ      | SJLGG002 | chr2       | 212222914 | 10              | 49                | 0                | 36                 | A                | G                    | TAATCAAGAAAATGATCAAG[A/G]AAGACATTATAAAAAGATG     |
| SJHQ      | SJLGG002 | chr3       | 70642818  | 28              | 70                | 0                | 34                 | G                | A                    | ATATTGAAAACATCATATCC[C/G]TTCGCTTCTGTGAATATA      |
| SJHQ      | SJLGG002 | chr3       | 88453160  | 21              | 45                | 0                | 26                 | C                | T                    | GGGGAGACAAGTCCACATA[C/T]TGGTATATTTCTTTCTTG       |
| SJHQ      | SJLGG002 | chr4       | 179660420 | 22              | 55                | 0                | 32                 | G                | A                    | ATCTTACATTTAGTTTGT[C/G]AJGATGCACTGTTTATTTCT      |
| SJHQ      | SJLGG002 | chr5       | 21093477  | 6               | 43                | 0                | 44                 | G                | T                    | AATTGTTGACATTTAATTTT[G/T]ATTATAATGTCACCATATAT    |
| SJHQ      | SJLGG002 | chr5       | 28285884  | 22              | 58                | 0                | 32                 | A                | G                    | TAAATGTTGCTTAATAGT[A/G]GGATATAAAATGCTTAAAT       |
| SJHQ      | SJLGG002 | chr5       | 51217917  | 9               | 62                | 0                | 45                 | A                | G                    | CTAGAAAATACCTAGATCTA[A/G]CTACATCTTATTTAAT        |
| SJHQ      | SJLGG002 | chr5       | 88392956  | 32              | 75                | 0                | 49                 | A                | G                    | TTTTGACCAAAAAATTC[A/A]GATCAACCTCTGTGCTCTAAT      |

|      |          |       |           |    |    |   |    |   |   |                                                 |
|------|----------|-------|-----------|----|----|---|----|---|---|-------------------------------------------------|
| SJHQ | SJLGG002 | chr5  | 91379540  | 20 | 67 | 0 | 32 | G | A | CAGGTTTCTGATTCTGATAT[G/A]TAAATCACTGTACTGTCCATA  |
| SJHQ | SJLGG002 | chr6  | 164992035 | 14 | 46 | 0 | 28 | C | A | AAGGTTTATGTCGTTGCTGCG[C/A]GTGATGGAATACGTCCTCT   |
| SJHQ | SJLGG002 | chr6  | 87139641  | 10 | 58 | 0 | 42 | C | G | TTATTTCCATCTTTCCAGT[C/G]TTCCCTTCCCATCCACAG      |
| SJHQ | SJLGG002 | chr7  | 138831656 | 24 | 80 | 0 | 28 | A | C | GGAAAGGTCAAATAGTATT[A/C]CTGTAACCTAAGGGCTTTCC    |
| SJHQ | SJLGG002 | chr7  | 83861043  | 15 | 44 | 0 | 31 | C | A | TCCTGTAATAAATAAGCA[C/A]CCTGAGGACATCCTTTGGCT     |
| SJHQ | SJLGG002 | chr8  | 49925456  | 8  | 39 | 0 | 28 | G | A | TTTATCTTTGGGATCACGT[C/G/A]TTGTTATCTTTAGGGTCACA  |
| SJHQ | SJLGG002 | chr8  | 68319496  | 18 | 49 | 0 | 30 | C | A | TGACCACCAATTACTGTCTG[C/A]ACTTAACACAGGAGGCAAGG   |
| SJHQ | SJLGG002 | chrX  | 70030849  | 23 | 33 | 0 | 15 | G | A | TAAATTTACAGAACATGTC[G/A]TACAAATATCCAAATGAGT     |
| SJHQ | SJLGG002 | chrX  | 92931352  | 7  | 24 | 0 | 25 | C | A | TACATTTGTAATCAACATCT[C/A]CAAATTAATTTATCAATATT   |
| SJHQ | SJLGG002 | chrX  | 93313112  | 16 | 21 | 0 | 19 | C | T | TAATGGCTTTAAAGACACAGT[C/G/A]TTTAAATTTTTGCAAGACT |
| SJHQ | SJLGG003 | chr10 | 37237851  | 6  | 36 | 0 | 40 | T | C | TATGGGCATAATGGAACCTT[C/T]AAAATTTCTGAAAAATCCCA   |
| SJHQ | SJLGG003 | chr11 | 2888783   | 5  | 27 | 0 | 39 | G | A | GAGACCTTCTCTGACTGAGC[G/A]CATGAAGCTGGCTCTTCCTG   |
| SJHQ | SJLGG003 | chr13 | 114253281 | 9  | 35 | 0 | 33 | C | T | ATGAAAAGTTTATTTAAAA[C/T]GTAGGGTGCAGAAAGGTGTC    |
| SJHQ | SJLGG003 | chr13 | 29585773  | 9  | 51 | 0 | 45 | T | C | TAACCTGAATAATATGGTTT[T/C]CCTTTTAAATTTATTTTCAT   |
| SJHQ | SJLGG003 | chr13 | 56627395  | 6  | 38 | 0 | 32 | T | G | TATCCAAATATATTATT[T/G]TTTCTGATGCATCACAAGAA      |
| SJHQ | SJLGG003 | chr13 | 93902566  | 10 | 38 | 0 | 36 | C | T | AAAGGAGTGACTCTTCTCA[C/G]TAAAGAAAAGTGAAGGTCCT    |
| SJHQ | SJLGG003 | chr13 | 94413478  | 10 | 40 | 0 | 41 | A | G | AATTAGGCACTGCATTATA[A/G]CTCTGATTTAAAAAGCAGT     |
| SJHQ | SJLGG003 | chr16 | 52242685  | 14 | 42 | 0 | 47 | G | A | TTTCAAACCTAGTTCAAAC[G/A]TTCTGAAATCCCTATGAGGC    |
| SJHQ | SJLGG003 | chr18 | 57520826  | 13 | 37 | 0 | 38 | T | C | AGAGTTCCCATGGGCTG[C/G]TGTCTGCTTAAGTAATGCT       |
| SJHQ | SJLGG003 | chr3  | 34733250  | 6  | 29 | 0 | 40 | T | C | ATAGTTATTGATATGCATCA[T/C]CAACTCTTTTGACATTTGTG   |
| SJHQ | SJLGG003 | chr4  | 53689686  | 11 | 29 | 0 | 42 | G | A | CAAATTAACCTTTAGGAGG[A/G]AAGAGGAGTCCATATCACTG    |
| SJHQ | SJLGG003 | chr6  | 162021358 | 8  | 35 | 0 | 38 | A | G | TTCTTTTCTATCCTCATT[C/A]GTCTGGTGGACTTCTTCCAA     |
| SJHQ | SJLGG003 | chr6  | 89159941  | 11 | 33 | 0 | 42 | T | G | CCACAGTTTTAAAAATAGG[A/T]JACATTTTCCAAATGTGAGC    |
| SJHQ | SJLGG003 | chr7  | 98144403  | 10 | 48 | 0 | 51 | C | T | GTTTTCTCTAGTCCCCTT[C/T]CTGTGATGATGAATGTCTGG     |
| SJHQ | SJLGG003 | chr8  | 99232972  | 10 | 43 | 0 | 29 | A | G | TTTCGCAACCTTTTACC[A/G]CCGGTCTTGGTTAAACT         |
| SJHQ | SJLGG003 | chr9  | 29161784  | 14 | 38 | 0 | 39 | A | G | TTCTGTGTAACAAGCCACT[A/G]TATAGTAACAATAAAAACTA    |
| SJHQ | SJLGG004 | chr10 | 98059142  | 11 | 47 | 0 | 34 | G | T | CCTGTATAAATAAATAAGT[A/G]TAAATCTTTGACTCTGTATG    |
| SJHQ | SJLGG004 | chr1  | 192542717 | 14 | 36 | 0 | 37 | T | A | AATTAATAGGGAACCTTCAA[T/A]GCCCTGCCATGCCTGTGCA    |
| SJHQ | SJLGG004 | chr1  | 195397308 | 12 | 37 | 0 | 33 | T | A | GAAGAGGAACTTTAAGCAA[T/A]TTTTTAAGTGGGAAGGGTAC    |
| SJHQ | SJLGG004 | chr12 | 40533284  | 7  | 35 | 0 | 38 | A | G | CACAAAAAAGTCATTTGC[A/G]ACACGATTTAATATGCTTAG     |
| SJHQ | SJLGG004 | chr1  | 245214406 | 11 | 38 | 0 | 26 | C | T | ACCTCTGTAATACCTTAA[C/T]GTAGCAACCTGGCCAGGCT      |
| SJHQ | SJLGG004 | chr14 | 73614921  | 5  | 35 | 0 | 41 | C | A | GGCAGGCTTCTCTACTTTA[C/A]CACATTTATAATATTTGG      |
| SJHQ | SJLGG004 | chr16 | 34416541  | 10 | 31 | 0 | 35 | C | G | CATATTCATTCCACAAAGAC[C/G]TTGTCTGCACAAGCACATC    |
| SJHQ | SJLGG004 | chr19 | 45408793  | 7  | 30 | 0 | 28 | T | C | TCTGGGCGGCAGCTCCACA[T/C]TCCCCTCCACGCTTGGCCC     |
| SJHQ | SJLGG004 | chr2  | 18459634  | 5  | 28 | 0 | 32 | C | A | TTATGAGTGTCCACATAG[C/A]TTTGTGCTTTGGGTAAT        |
| SJHQ | SJLGG004 | chr2  | 207494481 | 7  | 36 | 0 | 29 | C | A | TGCAATATTTGATAGATG[C/A]TAAAGTAGCTTTGCAACTCGT    |
| SJHQ | SJLGG004 | chr3  | 167036103 | 16 | 44 | 0 | 47 | T | C | AGCCTTCTCAGTGATATTG[T/C]AGTTAATATGGATACAAAAT    |
| SJHQ | SJLGG004 | chr4  | 111786553 | 8  | 55 | 0 | 40 | C | T | TTTTATAAAGTTCCTGTTT[C/T]ATGGCATGATAATTTTTTT     |
| SJHQ | SJLGG004 | chr4  | 183012805 | 9  | 32 | 0 | 38 | C | T | GCTGGTGTGAGAATGTCAA[C/T]GAAGCTGTATGGGGAGCCTT    |
| SJHQ | SJLGG004 | chr4  | 26959013  | 12 | 41 | 0 | 24 | T | C | AAACATTGACTAAGTACTT[C/T]CAGCTGTTGCTGGTGGTGG     |
| SJHQ | SJLGG004 | chr5  | 112548492 | 10 | 46 | 0 | 43 | C | A | GGGAGGCATTCTGTACTTT[C/A]TAAATGACCAAGATGTCAC     |
| SJHQ | SJLGG004 | chr5  | 11327568  | 14 | 43 | 0 | 37 | T | C | AATCTAAAAGGTAATTTG[C/T]CACAACACTCTATTACAACC     |
| SJHQ | SJLGG004 | chr5  | 51990441  | 9  | 43 | 0 | 23 | T | C | AGATACTCCACGGAGGCAT[C/T]CTACTTTACTATAATATATC    |
| SJHQ | SJLGG004 | chr5  | 53231159  | 11 | 33 | 0 | 27 | G | A | ACAAGCAGATACATGTTG[C/G]CAGATGGAAAGTGGGAGATAA    |
| SJHQ | SJLGG004 | chr6  | 140479581 | 6  | 40 | 0 | 28 | T | C | AAACTTAAATGGAAGAAG[C/T]ATAACATTAATATAGAAAAG     |
| SJHQ | SJLGG004 | chr7  | 40560567  | 10 | 51 | 0 | 31 | A | T | TCAACTCAAACCTAGTAAAT[A/T]ATTTTATGCAAAATGTGGTT   |
| SJHQ | SJLGG004 | chr8  | 3717642   | 8  | 30 | 0 | 31 | C | T | GTTTGCTTCATATTGATCC[C/T]CTTTGAAGCTTGAATCTAA     |
| SJHQ | SJLGG004 | chr9  | 8287786   | 10 | 42 | 0 | 40 | G | A | ACAATACAACCTCACTTGG[C/G]ATAGTATTGATCTTAGCCTC    |
| SJHQ | SJLGG004 | chr9  | 85566999  | 13 | 40 | 0 | 36 | C | T | TGTTGTACAAGGGGAGGTTA[C/T]CATCAAATAGAATGAAATA    |
| SJHQ | SJLGG004 | chrX  | 96272437  | 8  | 47 | 0 | 29 | C | T | ACAACATGAATTCACATATG[C/T]ATTGAATGGGGAGGAGAGT    |
| SJHQ | SJLGG005 | chr10 | 115664145 | 13 | 51 | 0 | 27 | C | T | TGAAAACTGGTAATTTGCA[C/T]GGTATTTTTAAAAAGAAAC     |
| SJHQ | SJLGG005 | chr10 | 2774404   | 20 | 45 | 0 | 34 | C | T | CAGCCCGCCAGCAGTCTT[C/T]GTATGCTACAAGTGGGCCTG     |
| SJHQ | SJLGG005 | chr10 | 72136713  | 6  | 37 | 0 | 35 | G | A | CATTGGGAAGGAGGTAGGG[C/G/A]CAGCCAACTGCAGGAGAAAG  |
| SJHQ | SJLGG005 | chr10 | 83187921  | 6  | 32 | 0 | 33 | C | A | CCACTCCACTGTGACACTAT[C/A]CCTGTGAAAGCTTCCATAAG   |
| SJHQ | SJLGG005 | chr1  | 190675532 | 12 | 42 | 0 | 19 | G | A | GCAAGGAATACTAAGGAG[C/G/A]TTGGTATTAAGGACAAATAA   |
| SJHQ | SJLGG005 | chr1  | 245230982 | 11 | 36 | 0 | 32 | G | A | GTTAGTAGAACAAAGTCCAC[G/A]TAACTACACCTGTGTGAAG    |
| SJHQ | SJLGG005 | chr12 | 54839093  | 13 | 54 | 0 | 22 | A | T | GGTGAGTTCGCCATGGCTAG[A/T]CTATGAATAGGATGGGGAGA   |
| SJHQ | SJLGG005 | chr14 | 62460886  | 7  | 40 | 0 | 34 | A | G | AACGGAGTTTGAATGGAAG[A/G]AGGTAGTGTGAAGAGAGAA     |
| SJHQ | SJLGG005 | chr1  | 70386933  | 6  | 49 | 0 | 36 | G | A | TGGGTTTTAAAGGAGAGTT[C/G/A]TTTTCAGGTAGAGTAGATAA  |
| SJHQ | SJLGG005 | chr17 | 26374441  | 14 | 58 | 0 | 31 | T | G | AAGCCAAAGGGAAAACTCT[G/T]GTGCTGTCTGTCAACTAAT     |
| SJHQ | SJLGG005 | chr18 | 31851119  | 10 | 60 | 0 | 43 | G | A | CTGCAAGCGTGATAACAAAAC[G/A]TAACTTTTCCCGCTAATTA   |
| SJHQ | SJLGG005 | chr20 | 62766267  | 18 | 58 | 0 | 41 | G | A | CGGTCCTTGACAGTGATTC[G/A]TGATCACAACACACACGCG     |
| SJHQ | SJLGG005 | chr21 | 45160246  | 7  | 35 | 0 | 26 | G | A | TGGCGCTGGGCGCAGAGCC[G/A]GCCGTGACCCACAAGTGGCT    |
| SJHQ | SJLGG005 | chr2  | 43874759  | 9  | 33 | 0 | 18 | G | A | TGTATTTTTCAATGCAACC[C/G/A]TATGGCATTGCTCTAAGTG   |
| SJHQ | SJLGG005 | chr2  | 59197351  | 4  | 38 | 0 | 43 | C | A | AAGACTAATTATTAATTT[C/G/A]TAACTTAAAGTGCAGTTT     |
| SJHQ | SJLGG005 | chr4  | 135925160 | 7  | 45 | 0 | 31 | C | A | TATGAAATTTTCATTAATG[C/A]CAATCAAATATCTAAATGA     |
| SJHQ | SJLGG005 | chr5  | 17315455  | 11 | 37 | 0 | 43 | A | T | CATATGAGAGCAATCACAG[A/T]TTGGGTAACAGCCAGAA       |
| SJHQ | SJLGG005 | chr5  | 45287715  | 14 | 51 | 0 | 38 | A | G | CTCACAATTCATTTTTGTTT[A/G]TAGTGAGGAAATAGAATTT    |
| SJHQ | SJLGG005 | chr5  | 76058741  | 11 | 54 | 0 | 43 | G | A | TTTTCCAGTTTCATCTTTT[A/G/A]AAGATTGAATCCAGCTACAG  |
| SJHQ | SJLGG005 | chr6  | 123713131 | 14 | 45 | 0 | 20 | C | T | ATGGAGGATTTGCAAAAGAC[C/G/A]TAACTTTTCCGCTCTGCT   |
| SJHQ | SJLGG005 | chr6  | 135466150 | 10 | 38 | 0 | 25 | G | A | AAGTAATGGCAAATGAAT[C/G/A]ATGTTTTAAACAATATTTTT   |
| SJHQ | SJLGG005 | chr6  | 135518947 | 12 | 55 | 0 | 37 | G | A | TTCCAATTCATCTTTAAAT[G/G/A]AAGATTTGGGAGAGGAGT    |
| SJHQ | SJLGG005 | chr7  | 57792624  | 8  | 51 | 0 | 34 | C | A | AATACCGTACAATATCAA[C/A]TTAGAAGAAGCATAAACAAAT    |
| SJHQ | SJLGG005 | chr7  | 85510801  | 7  | 47 | 0 | 39 | T | C | TATTTAAGCAAGAAATAGT[C/T]CAGTTGTTTCAATTAATAA     |

|      |           |       |           |    |    |   |    |   |   |                                                 |
|------|-----------|-------|-----------|----|----|---|----|---|---|-------------------------------------------------|
| SJHQ | SJLGG005  | chr8  | 135991722 | 6  | 59 | 0 | 45 | T | G | TAGATACTTTTCTACCATT[G/J]ATTTTTCTGTAAATGAACA     |
| SJHQ | SJLGG005  | chr8  | 25867300  | 8  | 54 | 0 | 33 | C | A | AAAACGTTTTTGCAGGAAA[C/A]ACCCCAAGTTAGAAAATCAGT   |
| SJHQ | SJLGG005  | chr9  | 103750607 | 12 | 45 | 0 | 41 | C | T | CTTTTGTCTTCCAAAATGGA[C/C]TCTTGTAGCCCAATTGAGAG   |
| SJHQ | SJLGG005  | chrX  | 73600657  | 13 | 58 | 0 | 40 | C | T | GGTGTCTAATAAAATTCATG[C/C]AAATGAGCCAGCCGTTGTGA   |
| SJHQ | SJLGG006R | chr10 | 31655854  | 6  | 60 | 0 | 47 | C | A | TATAGTTTCTAGTCCCTTTAG[C/A]ATCCACATACAGTTAGTGC   |
| SJHQ | SJLGG006  | chr10 | 31655854  | 15 | 76 | 0 | 47 | C | A | TATAGTTTCTAGTCCCTTTAG[C/A]ATCCACATACAGTTAGTGC   |
| SJHQ | SJLGG006  | chr1  | 103759863 | 23 | 74 | 0 | 41 | G | A | ACAAAATATGAAGCAAATTC[G/A]GGTATAGGGTTATTGAGAAG   |
| SJHQ | SJLGG006R | chr1  | 103759863 | 1  | 53 | 0 | 41 | G | A | ACAAAATATGAAGCAAATTC[G/A]GGTATAGGGTTATTGAGAAG   |
| SJHQ | SJLGG006  | chr15 | 66369870  | 12 | 42 | 0 | 30 | C | T | ATCTTCCCTAGTCCCACCTC[C/T]ACCTCCAGAAGGAACGAAAG   |
| SJHQ | SJLGG006R | chr15 | 66369870  | 2  | 36 | 0 | 30 | C | T | ATCTTCCCTAGTCCCACCTC[C/T]ACCTCCAGAAGGAACGAAAG   |
| SJHQ | SJLGG006  | chr2  | 99279218  | 12 | 64 | 0 | 48 | T | C | GGTTTCAGGACTCCCAAAGA[T/C]CATCATGTCAAATCTCCAAA   |
| SJHQ | SJLGG006R | chr2  | 99279218  | 2  | 50 | 0 | 48 | T | C | GGTTTCAGGACTCCCAAAGA[T/C]CATCATGTCAAATCTCCAAA   |
| SJHQ | SJLGG006  | chr5  | 167935873 | 9  | 43 | 0 | 26 | G | A | TGCAGGTACACGGAACATGA[G/A]CTCCTCTCTGAAAGAGGCTA   |
| SJHQ | SJLGG006R | chr5  | 167935873 | 6  | 38 | 0 | 26 | G | A | TGCAGGTACACGGAACATGA[G/A]CTCCTCTCTGAAAGAGGCTA   |
| SJHQ | SJLGG006  | chr6  | 55413428  | 11 | 80 | 0 | 48 | T | C | CTTAAATAAATCCATTTTT[T/C]TAAAGTAGCTTCAGCAATA     |
| SJHQ | SJLGG006R | chr6  | 55413428  | 4  | 62 | 0 | 48 | T | C | CTTAAATAAATCCATTTTT[T/C]TAAAGTAGCTTCAGCAATA     |
| SJHQ | SJLGG007  | chr10 | 132188426 | 12 | 50 | 0 | 26 | C | A | ACATGCTCAGGATGCTGTGG[C/A]TACAACAAAGCTTCCCTTCC   |
| SJHQ | SJLGG007  | chr1  | 195482878 | 16 | 73 | 0 | 40 | G | A | GTGTTATTTTTTCTGAAAC[C/A]TATAAGTACGAAAGTGGAAAT   |
| SJHQ | SJLGG007  | chr17 | 66687785  | 12 | 54 | 0 | 35 | C | T | TTGCAGGTCCTAATTTATTT[C/T]ACCTTCCGAAATGTTTAC     |
| SJHQ | SJLGG007  | chr2  | 840407    | 9  | 61 | 0 | 33 | A | C | GTATTGCTTTTGGCAGAAAT[A/C]ACACAAATACAGATTTTGTAT  |
| SJHQ | SJLGG007  | chr3  | 133488450 | 11 | 38 | 0 | 29 | G | A | TGTGGCACAATAGTACCC[C/G/A]TCTTCTCAGCTAGCTACCC    |
| SJHQ | SJLGG007  | chr3  | 25219789  | 10 | 55 | 0 | 42 | C | T | CTTAGAACACAGGGAACATA[C/T]GAAAAAGGGGAGTTAAAA     |
| SJHQ | SJLGG007  | chr4  | 174589322 | 8  | 46 | 0 | 32 | C | A | CAGAGTGTAAATAGCTCTG[C/A]CTCAAGAGGATTAATCTCATC   |
| SJHQ | SJLGG007  | chr5  | 158037051 | 15 | 45 | 0 | 33 | C | A | AGGCTTCTCTCAGCACTGG[C/A]AAGACTCCTCTTCTTATTTGC   |
| SJHQ | SJLGG007  | chr5  | 27407098  | 10 | 70 | 0 | 34 | A | T | GCTTCTAGTTTAGACAGAGA[A/T]GGCACTTGGTATATATAATA   |
| SJHQ | SJLGG007  | chr5  | 35774535  | 13 | 58 | 0 | 42 | C | G | AGTAAGATAATTTAGGTAC[C/G]TAATAGGAAAATAAATTTT     |
| SJHQ | SJLGG007  | chr5  | 78996169  | 6  | 54 | 0 | 43 | C | T | GCCTTGGGTTCCAGAACTT[C/T]GCGCAAGTTGTTTGTATTGTC   |
| SJHQ | SJLGG007  | chr6  | 169497461 | 6  | 47 | 0 | 35 | G | C | CCATTCTTCCCCTGTCTGC[C/T]CAGTATTATTAGTGCACAT     |
| SJHQ | SJLGG007  | chr6  | 74208128  | 12 | 70 | 0 | 39 | T | C | TATGCAAGATAGTACACCTG[T/C]ATGGCTTAAAGGAAACCATA   |
| SJHQ | SJLGG007  | chr7  | 140277043 | 14 | 55 | 0 | 52 | G | T | TATCTGAGAATAGTGGTAGAG[T/G]GAGAGTAAATAGATCAAAA   |
| SJHQ | SJLGG007  | chr7  | 147718283 | 4  | 38 | 0 | 43 | T | A | TTGTGTGGGAGGTTTTTTG[T/A]TTTTTTTTTTTTTTTTTGACT   |
| SJHQ | SJLGG007  | chr7  | 45261545  | 7  | 57 | 0 | 34 | A | G | TCCCTTCCAGGCCATAAAAC[A/G]GCTGCCATGTCCCTTTCCAC   |
| SJHQ | SJLGG007  | chr8  | 118809075 | 12 | 68 | 0 | 47 | T | C | GTATTAATGATTTGTAAG[C/T]TGATATTATAACACTTTC       |
| SJHQ | SJLGG007  | chr8  | 91813220  | 9  | 50 | 0 | 46 | C | T | CATCAAGACAATTTAAAATA[C/T]GTCCAAGATAATATGATTA    |
| SJHQ | SJLGG008  | chr10 | 110981766 | 8  | 57 | 0 | 42 | C | T | CTCCTTTCAAACCTTCC[C/T]GCAACCAATCTCCCTTATTTTCCAA |
| SJHQ | SJLGG008  | chr10 | 120678202 | 8  | 44 | 0 | 51 | A | G | GAGTTTATATGTTGAAAAG[A/G]CAACCAATCTCCCTTAGGGA    |
| SJHQ | SJLGG008  | chr10 | 28022177  | 20 | 69 | 0 | 32 | G | A | TGAATCTTTGATGATCAATTT[G/A]TCTCATATATATTTGTAAC   |
| SJHQ | SJLGG008  | chr10 | 32280861  | 6  | 47 | 0 | 38 | C | T | AAGTGGTTAGAATACACATG[C/T]ATGATACATGAGTATTATG    |
| SJHQ | SJLGG008  | chr10 | 58273208  | 9  | 37 | 0 | 24 | G | A | TCCATGTTAACTAAAACCT[C/G]CAGGAAGAAAGGAAGTCATA    |
| SJHQ | SJLGG008  | chr11 | 23857166  | 11 | 80 | 0 | 49 | T | G | TTATTATCTGCTATTATTT[G/T]GCTGAGAAAGTTCCTATATG    |
| SJHQ | SJLGG008  | chr11 | 33937779  | 12 | 62 | 0 | 31 | G | T | TCTGTCTTTTAGGATTA[A/G]CTTCTAAGAAAAAACACTG       |
| SJHQ | SJLGG008  | chr11 | 6242085   | 10 | 71 | 0 | 41 | A | G | TGTCTTAAACATGAACAGG[A/G]CAATATGAGGCCAATCATGG    |
| SJHQ | SJLGG008  | chr1  | 175497615 | 5  | 44 | 0 | 47 | G | A | CCTTTAAAATAAATTTGTAG[C/A]TGCAACATGTGAATTTCCAA   |
| SJHQ | SJLGG008  | chr1  | 187205072 | 6  | 48 | 0 | 41 | C | T | AATTTGACATGAAATAAAA[A/C]TJAAAAGCTCTTTTCAAACCT   |
| SJHQ | SJLGG008  | chr1  | 188967797 | 17 | 56 | 0 | 61 | C | T | TCATATGACAGAATCCTGA[C/T]GGAATGAAAAAGTACTAT      |
| SJHQ | SJLGG008  | chr11 | 90890947  | 12 | 76 | 0 | 40 | T | C | CTGAAAATGTAGGCTTTT[C/T]GAAAAGTTAATATTGTGAAA     |
| SJHQ | SJLGG008  | chr1  | 198190092 | 7  | 50 | 0 | 34 | G | C | AGAAGGAATATTGAGTTTTT[G/C]AATAACCTTGAAGATTGAAA   |
| SJHQ | SJLGG008  | chr12 | 129969018 | 19 | 52 | 0 | 47 | G | A | TTGCTATAAAATATCATCT[C/G]ATGCTCAGAAAGTTCGCAAA    |
| SJHQ | SJLGG008  | chr1  | 215159969 | 9  | 48 | 0 | 34 | G | T | TAAGTAGCATGTTACTGTCA[G/T]TGGTAGTGGGACTTTGGAGG   |
| SJHQ | SJLGG008  | chr12 | 20575338  | 7  | 40 | 0 | 35 | C | G | TTAAAAGATAATCTATG[C/G]TGAAGTGCCATTTTATTTT       |
| SJHQ | SJLGG008  | chr12 | 67579852  | 12 | 52 | 0 | 42 | C | T | TGGTGGCATCATGACCTAAA[C/T]ATGGCAAGAGTTTCAATTA    |
| SJHQ | SJLGG008  | chr12 | 85815951  | 8  | 52 | 0 | 32 | C | T | CCAACCTGTATTTCATA[A/C]TJACTGAAAAGCAGTGTATTAG    |
| SJHQ | SJLGG008  | chr13 | 104627913 | 8  | 42 | 0 | 38 | C | A | TTTATGGGAATATCAATTT[C/A]TJTTTACTATATCTGTGGCTT   |
| SJHQ | SJLGG008  | chr13 | 111691609 | 9  | 34 | 0 | 32 | T | C | TGTGTGTTTGGAGAATTA[T/C]GTATTCCTATGATCTTTTGT     |
| SJHQ | SJLGG008  | chr13 | 31070300  | 6  | 54 | 0 | 46 | C | T | GCACTGAAAGATGGGGGTG[C/T]CAAGGAAGGAAAAGGAAAA     |
| SJHQ | SJLGG008  | chr1  | 35212521  | 6  | 26 | 0 | 26 | C | T | GAGGCATAGTCTGGGGGTG[C/T]GAGGGGGGGGACGCGAGGG     |
| SJHQ | SJLGG008  | chr13 | 56159078  | 7  | 45 | 0 | 34 | G | A | TTCAACATAGTAGAGGGAC[C/G]AAGATGAAACCAAGCTCTGTT   |
| SJHQ | SJLGG008  | chr13 | 64946462  | 6  | 57 | 0 | 46 | G | A | AAAAGAAAAGTGGAGGAAAC[C/A]TGAAGAGAGAAGTACTGA     |
| SJHQ | SJLGG008  | chr13 | 70047547  | 8  | 48 | 0 | 31 | T | A | GAGGCAGACTACATATCCA[T/A]GGTCAATGTTGAAAGATG      |
| SJHQ | SJLGG008  | chr13 | 86277261  | 5  | 41 | 0 | 43 | A | G | AAGTATGTACAGTGTCAATTT[A/G]TGTCTCATTTAGTTTAAAT   |
| SJHQ | SJLGG008  | chr13 | 88221575  | 11 | 43 | 0 | 39 | C | T | ATCTGAAATTCAGCTTCAAT[C/T]GTTTACCCAAAGTTAGAAAAGC |
| SJHQ | SJLGG008  | chr14 | 41921858  | 11 | 50 | 0 | 39 | A | G | AGGCATCTTTACATCAAAAT[A/G]TTTTTAAAGATAAAATCAAAAT |
| SJHQ | SJLGG008  | chr14 | 44572681  | 6  | 46 | 0 | 43 | C | T | AAGTATGTGGTTTCCAGACTA[C/T]CATAAGTAAATCAATGGGAA  |
| SJHQ | SJLGG008  | chr14 | 51105854  | 7  | 46 | 0 | 48 | G | C | AGCATTATAGACTTTTGTGA[G/C]CAGACACAGGAACATAACTT   |
| SJHQ | SJLGG008  | chr14 | 68102648  | 11 | 55 | 0 | 52 | G | A | ATCTGCCATGAAAATTTT[G/A]AGTCTGTAATCTTAAAGGCC     |
| SJHQ | SJLGG008  | chr14 | 71569526  | 15 | 50 | 0 | 42 | C | A | TTTTATATGCAATTTGGG[C/A]AGCATCTCTTTTTAAAAAGT     |
| SJHQ | SJLGG008  | chr15 | 27496357  | 9  | 38 | 0 | 36 | T | C | TCGGCCAGATTTTCTCTG[C/T]GTGAGGCTTTGAACTTAGTT     |
| SJHQ | SJLGG008  | chr1  | 55716865  | 7  | 46 | 0 | 35 | G | T | CTAAGAGAAGTGTGAAAAG[G/T]GATTTCTGGAAGTGCAGGGTC   |
| SJHQ | SJLGG008  | chr15 | 67837527  | 8  | 46 | 0 | 35 | A | T | TCTCTGTGCTATTCTGTGTT[A/T]TGTGCCCCACTCTGTGTGC    |
| SJHQ | SJLGG008  | chr15 | 72576586  | 7  | 52 | 0 | 41 | A | C | TCAAATGATGCAAGCTGCT[A/C]AAATGGCTTTTGCCAAATGTC   |
| SJHQ | SJLGG008  | chr15 | 77747962  | 6  | 47 | 0 | 43 | A | G | GACCTGTTTGTAAAAGTGC[A/G]GTGAAGAGCCAAACTTGAT     |
| SJHQ | SJLGG008  | chr16 | 54871790  | 14 | 48 | 0 | 34 | G | A | GCACGTAGTAGGTGCTGCAC[G/A]CAGTTTTTATTCTTCTTCTC   |
| SJHQ | SJLGG008  | chr16 | 66024983  | 7  | 44 | 0 | 33 | G | A | GCAGAAGATAAAAACCTTAC[A/G]CCTTTTGGTATGTTTTCTT    |
| SJHQ | SJLGG008  | chr16 | 80248612  | 7  | 44 | 0 | 34 | T | C | ACATAATCAGTTCTGTACG[T/C]ACTCTCTTCAACTTTTGA      |



|      |          |       |           |    |    |   |    |   |   |                                                    |
|------|----------|-------|-----------|----|----|---|----|---|---|----------------------------------------------------|
| SJHQ | SJLGG008 | chr7  | 22026079  | 11 | 45 | 0 | 25 | G | A | AACGCAGCTTGTCTGCTG[C/G]A]TCTCCCCACTAGGCCCAA        |
| SJHQ | SJLGG008 | chr7  | 41827931  | 16 | 80 | 0 | 54 | A | C | TTTCATTAATTGCTTCCCT[A/C]TTTACTGTAACTACTCACT        |
| SJHQ | SJLGG008 | chr7  | 52190879  | 10 | 61 | 0 | 35 | C | T | GAAGAAGTAAAAATGCAAGC[C/T]GTTCTAATGGTAATTTAGCA      |
| SJHQ | SJLGG008 | chr7  | 53829853  | 11 | 90 | 0 | 66 | G | C | TATCTTAGTAGACATTTT[G/C]TATTTGGTTCAAATTTTG          |
| SJHQ | SJLGG008 | chr7  | 85156985  | 9  | 51 | 0 | 39 | T | C | GCACTATTAAAGTACTTAA[T/C]JAGGTACTCTATAGCCCTTT       |
| SJHQ | SJLGG008 | chr8  | 111569066 | 18 | 76 | 0 | 35 | A | T | CAAAAAAATAGTAAATAAT[A/T]JTAAATACTCTCAATTTTT        |
| SJHQ | SJLGG008 | chr8  | 137823894 | 12 | 72 | 0 | 47 | A | G | AATAAAAATGATAACATGCC[A/G]AAGGTCTCTATTCTAGTCAT      |
| SJHQ | SJLGG008 | chr8  | 20975286  | 7  | 59 | 0 | 39 | T | A | TCAATCAATGAATAAAGCAA[T/A]TAATAAAGATGGATTCTT        |
| SJHQ | SJLGG008 | chr8  | 27152181  | 15 | 60 | 0 | 35 | C | T | ATCATAGAAATGAATGGCTG[C/T]GAATAGCAATGATTTTTTT       |
| SJHQ | SJLGG008 | chr8  | 34163324  | 9  | 47 | 0 | 36 | G | A | TGAATGACACACTCTGAGG[G/A]JAGGGGACAATGTTCTGAAT       |
| SJHQ | SJLGG008 | chr8  | 36408766  | 17 | 61 | 0 | 44 | T | C | ACATTGGTCAGTCATTCTAA[T/C]JTGAAATGCTATTTTTAAC       |
| SJHQ | SJLGG008 | chr8  | 80342901  | 12 | 52 | 0 | 48 | T | C | AAGAGAATATCCACCAACA[C/T]TTTCCCATGGTCAGAAAGA        |
| SJHQ | SJLGG008 | chr8  | 84588468  | 11 | 66 | 0 | 51 | A | C | TATTAATATATCTACAAA[A/C]CTTAGGTTAGCATATCTTAG        |
| SJHQ | SJLGG008 | chr9  | 112759693 | 7  | 52 | 0 | 38 | T | A | GATAGTCTCGTGTCTAAT[C/T]JGCTACTATTGCAGCCCGCT        |
| SJHQ | SJLGG008 | chr9  | 12632753  | 8  | 60 | 0 | 43 | G | A | TTGCCTCTTCATTAGAGT[G/A]JAGGTTCTTTATGAGCAGAAA       |
| SJHQ | SJLGG008 | chr9  | 32947395  | 9  | 43 | 0 | 34 | G | A | TCGCCCTGAACCCGCAAC[C/G]JCGTCATCGAAGGGGAAGGGT       |
| SJHQ | SJLGG008 | chr9  | 9587548   | 11 | 59 | 0 | 51 | C | A | AATGGCAGCCAAAAAAGAC[C/A]JAGTTTGCTTCTTCAAGTA        |
| SJHQ | SJLGG008 | chrX  | 104573299 | 8  | 46 | 0 | 37 | C | A | TGCGTTTACCCTGCAGCAAAA[C/T]JGCTACAGAAATTCACCTGAG    |
| SJHQ | SJLGG008 | chrX  | 120485826 | 9  | 55 | 0 | 29 | G | T | CAAAGATAGGGAGAACATG[C/T]JGCTACTATTGCTGTTGTTGT      |
| SJHQ | SJLGG008 | chrX  | 127638278 | 9  | 71 | 0 | 44 | C | T | GAATAAGGTAGTAAAAGAA[C/T]JGCTAAGTGTGCTAGATTA        |
| SJHQ | SJLGG008 | chrX  | 134228378 | 7  | 36 | 0 | 28 | G | C | CCTTCCCTCTCCACCTTTT[G/C]JGCTGCTGCAACCCCTTACA       |
| SJHQ | SJLGG008 | chrX  | 149796814 | 14 | 53 | 0 | 39 | T | A | CAGACACTCTCCCTCTTTT[A/J]TTGAAACCTAACTTTCCCC        |
| SJHQ | SJLGG008 | chrX  | 26311805  | 7  | 49 | 0 | 38 | G | C | TTCTTTATCTGGTTTGAGG[C/G]JGCTACTTTTCCCTCCTCAA       |
| SJHQ | SJLGG008 | chrX  | 26313269  | 9  | 60 | 0 | 43 | A | T | TTCAAGATGAAATAGTAAT[A/T]JGCTTTGAGTTTCTCAAAG        |
| SJHQ | SJLGG008 | chrX  | 4009997   | 10 | 46 | 0 | 40 | C | T | GGGATAAGAGGTAATAACA[C/T]JGCTTTTATATTAATCAAC        |
| SJHQ | SJLGG008 | chrX  | 40274147  | 9  | 47 | 0 | 25 | G | A | GAGTTAGTGACTGTACTG[C/G]A]AAGAAGGCAGTGGTAAGGA       |
| SJHQ | SJLGG008 | chrX  | 43340235  | 6  | 54 | 0 | 51 | T | C | CTTGCCACTGCAGTCTTCTG[C/T]JGCTACTTACCTAATCAT        |
| SJHQ | SJLGG008 | chrX  | 55286473  | 8  | 65 | 0 | 54 | G | A | GGAAAAACATGTGTAAC[C/A]JGCTACTTAAGTTGATTAACAA       |
| SJHQ | SJLGG008 | chrX  | 68021339  | 8  | 38 | 0 | 24 | G | A | CAGTTGGTTGGCTGCAGAG[C/G]A]GTAAGTTGGCTGTGAGACC      |
| SJHQ | SJLGG008 | chrX  | 75569853  | 8  | 45 | 0 | 30 | A | C | TTTATTTTCAGTAATA[A/C]JGCTAAAGCACTTTAACTCTCT        |
| SJHQ | SJLGG008 | chrX  | 81080406  | 14 | 45 | 0 | 43 | T | C | CCCCAAGAAAAGCTCTAAGT[T/C]JGCTTTTCCCTCTACTTCT       |
| SJHQ | SJLGG008 | chrX  | 98357510  | 11 | 37 | 0 | 27 | C | A | TCCAGCAGAGTAGAAAACAT[C/A]JGCTAAACACCATTTGAGTGCCT   |
| SJHQ | SJLGG009 | chr10 | 37108468  | 9  | 39 | 0 | 32 | G | A | AGCATAGGCAGAAAATAC[C/G]A]GTAAGTTGAAGTTATTATTA      |
| SJHQ | SJLGG009 | chr10 | 37825036  | 12 | 48 | 0 | 40 | A | G | ATGAGGACATAGCCACAGGA[A/G]JGCTGTGGCATCTGTGCTCAC     |
| SJHQ | SJLGG009 | chr10 | 99283347  | 7  | 42 | 0 | 32 | C | A | CTGAGCCAGCAGCTGGCAT[C/A]JGCTAAGGATGAGGATGGTGTGA    |
| SJHQ | SJLGG009 | chr11 | 10762648  | 7  | 43 | 0 | 27 | C | T | CCAGAGCCCTGGCAATGACC[C/T]JGCGCCAGGGAGCTTGGAGAG     |
| SJHQ | SJLGG009 | chr11 | 18042805  | 8  | 45 | 0 | 36 | A | G | TATATTTACATACTAGGCA[A/G]JGCTAAACAAATCTTTAGAT       |
| SJHQ | SJLGG009 | chr11 | 215147513 | 9  | 59 | 0 | 45 | G | A | ATTTAATGAAAGGCTGAAAG[C/A]JGCTTTTGGCTCCCATGGG       |
| SJHQ | SJLGG009 | chr12 | 43657595  | 9  | 52 | 0 | 32 | A | G | TTTATTTCTTTTAACTCC[A/G]JGCTAAGAAATTTGGTAGTTGCAT    |
| SJHQ | SJLGG009 | chr12 | 72200585  | 11 | 43 | 0 | 42 | A | T | TTAAGTTCCAAAACAAAAGC[A/T]JGCTAAACACAAATGACTTTA     |
| SJHQ | SJLGG009 | chr12 | 84664911  | 8  | 52 | 0 | 29 | C | T | CCTTCTGACAGGAAAAGCCT[C/T]JGCTCCAGGCTTTTACTCTA      |
| SJHQ | SJLGG009 | chr17 | 33119262  | 8  | 44 | 0 | 28 | G | A | TGATGAATGGAGATGCCTT[C/A]JGCTGGGTGAAACAGGAGCAT      |
| SJHQ | SJLGG009 | chr18 | 59549099  | 13 | 46 | 0 | 39 | C | A | TCTCAGAGAAGACATTTT[C/A]JGCTTTGTAATTAACAGTCTTCT     |
| SJHQ | SJLGG009 | chr20 | 58060708  | 16 | 59 | 1 | 47 | C | T | ATATTTGAGGGGCTGAAA[C/T]GATAGCCCCACTACTTTCT         |
| SJHQ | SJLGG009 | chr21 | 17714370  | 6  | 33 | 0 | 33 | T | C | AGCGAACGTCTAATCACTA[T/C]JGCTGTGATGGTATTACATGA      |
| SJHQ | SJLGG009 | chr2  | 121617865 | 15 | 52 | 0 | 41 | G | A | CCTGAGGATGGCTTCGGT[C/A]JGCTTCCAGTACCCCAAGGAGC      |
| SJHQ | SJLGG009 | chr2  | 123114965 | 4  | 28 | 0 | 41 | G | A | AACAGCAATGGCAGCAAGAG[C/G]A]GTCATTTACTGAGTGCACT     |
| SJHQ | SJLGG009 | chr2  | 175450695 | 11 | 36 | 0 | 28 | C | T | CACTGAAAACAAATTCACCTT[C/T]JGCTAAGTGGCTTCTCCTCGC    |
| SJHQ | SJLGG009 | chr2  | 194252519 | 16 | 46 | 0 | 45 | C | T | AGGACTTCAATAAGAAAAG[C/T]JGCTAGGATGATTTCAAAAAA      |
| SJHQ | SJLGG009 | chr2  | 222934748 | 8  | 55 | 0 | 35 | G | T | AATGCCAATTTCTACAGAAA[G/T]JGCTAATTTCTAGCCATCCA      |
| SJHQ | SJLGG009 | chr3  | 35954934  | 14 | 50 | 0 | 31 | A | G | TTATTTTGTGTTTATGTTT[A/G]JGCTCAGCATGATCACATGGAC     |
| SJHQ | SJLGG009 | chr4  | 22895051  | 16 | 54 | 0 | 38 | G | A | CTAAGTTTCTAAATTTATAC[C/G]A]GCTTAAATCTGTAAAGGA      |
| SJHQ | SJLGG009 | chr4  | 34870326  | 11 | 46 | 0 | 38 | A | G | CGTTTAAATTTCTATAACT[C/G]A]GCTTAAACTGTTTACTCCCAA    |
| SJHQ | SJLGG009 | chr5  | 139672297 | 7  | 48 | 0 | 33 | A | G | CATTTGAACCTAAATATAT[A/G]JGCTAATAAGGATACACTC        |
| SJHQ | SJLGG009 | chr5  | 161600880 | 9  | 48 | 0 | 53 | A | T | ACAAAAATCACTCATGTT[C/A]JGCTAAACAAATCATTTTGCAA      |
| SJHQ | SJLGG009 | chr5  | 19651847  | 15 | 54 | 0 | 35 | G | A | TTTCATTTGAAGGATAAAT[G/A]JGCTATGATAAGCAGGATAG       |
| SJHQ | SJLGG009 | chr5  | 98333070  | 21 | 63 | 0 | 35 | C | T | CTTGAATGGAAGTGAAGGAA[C/T]GTAAGAGATGAATACAAGGAA     |
| SJHQ | SJLGG009 | chr6  | 82660522  | 9  | 59 | 0 | 34 | A | G | AGCTCTGATATTATCAGAA[A/G]JGCTTCTACCCTGGCCTCAGG      |
| SJHQ | SJLGG009 | chr7  | 119867524 | 15 | 53 | 0 | 33 | G | A | ATTGTGCTAGCCCTTCTGAC[C/G]A]GCTTCAATATCTGCTTTAC     |
| SJHQ | SJLGG009 | chr7  | 24595833  | 8  | 52 | 0 | 25 | C | G | GTTCACAATTTTCTTTTAA[C/G]JGCTAGGACTCTGGCTTCTCTG     |
| SJHQ | SJLGG009 | chr8  | 133802618 | 10 | 38 | 0 | 26 | G | A | TACCATTTAATGCAATTTAC[C/G]A]GCTTAAATTTGCAAGATCTCGAT |
| SJHQ | SJLGG009 | chr9  | 30588595  | 7  | 48 | 0 | 35 | G | T | ATTTCCAGCCTCCAATGTTG[C/T]JGCTTCTGAAAATTTGTCC       |
| SJHQ | SJLGG009 | chr9  | 34575313  | 10 | 41 | 0 | 27 | G | A | AGGCTAAGTCTGTGGGAG[C/G]A]GCTGACTGCTCCTCTGTAG       |
| SJHQ | SJLGG009 | chr9  | 39110944  | 4  | 28 | 0 | 30 | C | T | AAATTTGCCAGTTCTCAAAC[C/T]JGCTTTTGTATGCATTTGTG      |
| SJHQ | SJLGG009 | chrY  | 3338677   | 14 | 24 | 0 | 20 | G | A | TTGATTGATAAAATTTAAT[C/G]A]GCTTAAATTTTATGAGTTGCT    |
| SJHQ | SJLGG010 | chr10 | 133118134 | 11 | 39 | 0 | 24 | C | T | TGGTGGGACACCTGGTGAC[C/T]JGCTGAGACATATCCGTACTAGC    |
| SJHQ | SJLGG010 | chr10 | 1624462   | 20 | 43 | 0 | 30 | C | T | TGGGAAGTGACGTGACCCTG[C/T]JGCTTACTGCTGGTGGCAGAG     |
| SJHQ | SJLGG010 | chr10 | 96919980  | 14 | 40 | 0 | 34 | C | T | CCCATCTACTGAAAATTT[C/G]JGCTACTGGTCTGTGAGACCA       |
| SJHQ | SJLGG010 | chr1  | 191839968 | 7  | 31 | 0 | 28 | C | G | TCAAGTTTGGGAAATGAA[C/G]JGCTTTCCAGAGGGTAGTGTC       |
| SJHQ | SJLGG010 | chr12 | 127173121 | 6  | 42 | 0 | 34 | T | A | CCAATCTAGAAAACACCTGTT[A/J]GCTTTGGGTGAGAAAGTTT      |
| SJHQ | SJLGG010 | chr12 | 25983302  | 12 | 45 | 0 | 48 | G | A | TAAGTCAATGAGGTTTTCC[C/G]A]GAAATCAGGTTTTGTTGGAG     |
| SJHQ | SJLGG010 | chr13 | 32088692  | 13 | 44 | 0 | 38 | G | T | GAGAAAAAGGGTCCAGGAA[C/T]JGCTGAAATAAACAGGGAGT       |
| SJHQ | SJLGG010 | chr13 | 62890188  | 21 | 60 | 0 | 33 | T | C | CATTAAGTGAATGCTTAGT[C/T]GATCAATATTAACATA           |
| SJHQ | SJLGG010 | chr13 | 88921749  | 17 | 45 | 0 | 35 | C | T | TAACTTTGTTTACCCAAAT[C/T]JGCTTAAATTTGCTACACTAATTC   |

|      |          |       |           |    |    |   |    |   |   |                                               |
|------|----------|-------|-----------|----|----|---|----|---|---|-----------------------------------------------|
| SJHQ | SJLGG010 | chr14 | 53408824  | 8  | 40 | 0 | 31 | C | A | GCTGGAACCTATTAATAATA[C/A]TAGATTATATTTAACCTAC  |
| SJHQ | SJLGG010 | chr14 | 81733878  | 13 | 47 | 0 | 39 | A | G | ATGCCCTCAGGTATTATGAT[A/G]TTTGTTCAGGAATCAGAAG  |
| SJHQ | SJLGG010 | chr17 | 32765701  | 11 | 35 | 0 | 32 | T | C | AGGGGACAGGGCTGGGAAG[T/C]CCCTTTAACTTCTGACATC   |
| SJHQ | SJLGG010 | chr17 | 60040431  | 4  | 33 | 0 | 37 | G | A | CCCTCCTCCTCTTTTTG[A/T]GAAAGGCTGAGAAAGCCT      |
| SJHQ | SJLGG010 | chr18 | 14632198  | 17 | 44 | 0 | 29 | C | A | ACTTCAGCACTGGGCTGTG[C/A]ACAGCAGGATGTGGGCGAGT  |
| SJHQ | SJLGG010 | chr1  | 82282382  | 18 | 38 | 1 | 28 | A | G | GTTAAAAAGATGTTCCAAAG[A/C]CTTTCTGTTTGGCATTATT  |
| SJHQ | SJLGG010 | chr19 | 30587951  | 16 | 46 | 0 | 35 | C | T | TTCAACAGATGGAGGGTGC[G/T]GGCCCCAGAGCTGGGGAGC   |
| SJHQ | SJLGG010 | chr20 | 51342344  | 15 | 45 | 0 | 31 | G | C | AAAGTCTTCATGGAAGGCA[G/C]CTATTGTGCACTAATGGTATT |
| SJHQ | SJLGG010 | chr20 | 76211281  | 26 | 47 | 0 | 26 | C | T | TAATAATTACTCGTCTCC[G/T]GTAGTATTAGTGAATTGCT    |
| SJHQ | SJLGG010 | chr21 | 10399670  | 8  | 69 | 0 | 42 | C | A | AATTGATAGGAAAGACATGA[C/A]AAGGTAAATGAAATCAATGG |
| SJHQ | SJLGG010 | chr2  | 122952047 | 15 | 56 | 0 | 40 | C | T | AATGCTGTGAGATGCAAGCA[C/T]GTGGTAAACCCATGCTGGTT |
| SJHQ | SJLGG010 | chr21 | 25301294  | 7  | 56 | 0 | 51 | G | T | CCAGTTAATACCTGCAAAAT[G/T]CTAAAAATATAATCCTTTAA |
| SJHQ | SJLGG010 | chr21 | 26130023  | 13 | 46 | 0 | 43 | C | T | TGTATTTATTCAGAACA[A/G]GGCAATGTAATTTGTCAATGC   |
| SJHQ | SJLGG010 | chr21 | 36847422  | 14 | 49 | 0 | 28 | C | T | AATGAAGAGCATTTCAAAG[C/T]GTGGTAAAGGAGCTGGGCTG  |
| SJHQ | SJLGG010 | chr2  | 194972007 | 12 | 40 | 0 | 27 | G | A | ACAGGTAATTTTACTATT[C/G]ATATGAGTTGATAACACACC   |
| SJHQ | SJLGG010 | chr2  | 218495496 | 7  | 56 | 0 | 33 | G | C | GACTCTTGAGAAAATACTA[G/C]AAGTCTACATCTGACGGCCT  |
| SJHQ | SJLGG010 | chr2  | 34083392  | 4  | 35 | 0 | 38 | A | G | GTGGATTCTTTTCCAGGAT[A/G]CAACTATTACAAAATATC    |
| SJHQ | SJLGG010 | chr2  | 73835433  | 16 | 44 | 0 | 26 | G | A | CCTTCCAGATTGTGACCC[C/G]AAGGTAGGTTTCTGTGCTG    |
| SJHQ | SJLGG010 | chr3  | 162673386 | 16 | 44 | 0 | 54 | G | T | AGTCCCTGGGAATAATATA[G/T]TTTGTAGTCGAAAATAATT   |
| SJHQ | SJLGG010 | chr3  | 176510280 | 9  | 51 | 0 | 34 | C | T | CAAAATCTTTCTACAATAC[C/T]CCCAATGATTCAGGATATC   |
| SJHQ | SJLGG010 | chr3  | 183429508 | 10 | 56 | 0 | 40 | C | G | GACTTCCATATGTAACATTA[C/G]ATAATGAGCCACTCTCCTAG |
| SJHQ | SJLGG010 | chr4  | 11674301  | 19 | 54 | 0 | 45 | G | A | ACCACTGTCTGAATCAACA[G/A]CTCACTGTAGGATCGACTT   |
| SJHQ | SJLGG010 | chr4  | 60085607  | 7  | 50 | 0 | 32 | C | T | CTATTACTTTTAAACCC[A/C]TTTGTCTGCTGAGAAAGCA     |
| SJHQ | SJLGG010 | chr4  | 64615568  | 12 | 53 | 0 | 28 | C | A | TATTTTGGATTATAAAT[C/A]ACTATAATTTATTTATATA     |
| SJHQ | SJLGG010 | chr4  | 69491973  | 7  | 39 | 0 | 53 | A | T | CAGCTTTTCTCTGACTACTA[A/T]TAGAAATCTTAGGAATGC   |
| SJHQ | SJLGG010 | chr4  | 88261328  | 16 | 52 | 0 | 54 | C | A | ACTCTGGTCTCCTTAATAT[C/A]ATTGTTCTATGATCCATTA   |
| SJHQ | SJLGG010 | chr5  | 22811515  | 4  | 37 | 0 | 42 | C | T | AGGCCCTAAGCAGATAG[A/G]ATGATTTAGTGGGGAAGTT     |
| SJHQ | SJLGG010 | chr5  | 28438140  | 14 | 41 | 0 | 23 | C | T | AATAATCCCAACTAACA[C/T]TTCTGTGACTACTAATCCA     |
| SJHQ | SJLGG010 | chr5  | 28439090  | 21 | 65 | 0 | 43 | T | C | CTCAGAGAGTAAATGATG[T/C]AATGTTAAGATACAGTTAAG   |
| SJHQ | SJLGG010 | chr6  | 104502240 | 15 | 45 | 0 | 23 | G | A | GACATTTTGTGTTAAATACC[G/A]TATATGAAACTTATATGTA  |
| SJHQ | SJLGG010 | chr6  | 13386102  | 16 | 50 | 0 | 38 | T | C | AGGATAAAGCCAGTAAAT[A/T]CTCCCTTCAGTCCCTCTCT    |
| SJHQ | SJLGG010 | chr6  | 158015339 | 7  | 47 | 0 | 36 | A | G | GGTTTTCTTAACATAGATA[A/G]TTACTTTGACGCTTGCCTCC  |
| SJHQ | SJLGG010 | chr6  | 48722658  | 19 | 51 | 0 | 32 | G | A | GTGATCTGCTCCTCGGGA[G/A]TTCACTTCCAAAACAGAAA    |
| SJHQ | SJLGG010 | chr6  | 50062380  | 10 | 27 | 0 | 32 | G | A | ATCTTGAATATGAAGGGT[A/G]AACAATTTTCACTATACAT    |
| SJHQ | SJLGG010 | chr7  | 115692363 | 8  | 57 | 0 | 47 | A | G | TATTTATTACATTTTCAA[A/G]ATGTGTTAAATATAAGCCAT   |
| SJHQ | SJLGG010 | chr7  | 79270796  | 16 | 37 | 0 | 45 | G | C | CTGTATTATAAAACATGA[G/C]TCTATCACTGCTAATGTCAA   |
| SJHQ | SJLGG010 | chr7  | 98859419  | 27 | 54 | 0 | 34 | G | A | AGCCAATTGAAGTGAAGTCC[C/G]ACTCACACTTCTCATCACTT |
| SJHQ | SJLGG010 | chr8  | 109087160 | 22 | 57 | 0 | 24 | G | A | GTGGTCTCTCATACTTACA[G/A]AACTGTTCTAAAATACACA   |
| SJHQ | SJLGG010 | chrX  | 85553030  | 6  | 24 | 0 | 24 | T | A | CCTCCTGCTTCTGCTTCT[A/T]ATGAAAGTGCATTTGTATA    |
| SJHQ | SJLGG011 | chr10 | 132013707 | 17 | 56 | 0 | 21 | C | A | GGGTCAGCTGCAAGATTAC[C/T]ACTTAAACAGCAATCCTGCT  |
| SJHQ | SJLGG011 | chr10 | 33523676  | 6  | 46 | 0 | 33 | T | C | TGCTGAATTAATGCCTTTT[C/C]CCATAGTAAATAAAGGAG    |
| SJHQ | SJLGG011 | chr10 | 82720982  | 9  | 39 | 0 | 31 | T | C | CAGAAATCATCAAAATTC[C/T]CCAGATGAGCCTTACCAAG    |
| SJHQ | SJLGG011 | chr10 | 83736302  | 16 | 47 | 0 | 32 | G | T | ACTTAGGATAGATTGCTGA[G/T]ATATTTTTCATCAATGGAAA  |
| SJHQ | SJLGG011 | chr11 | 25721067  | 18 | 44 | 0 | 45 | G | A | CTGAGTACAGCACACAGCA[G/A]GGACCTGGGCTGTCTGGGA   |
| SJHQ | SJLGG011 | chr11 | 92024566  | 11 | 54 | 0 | 29 | T | A | GAGAAGACAGGGTAAAGAT[T/A]TATAGATCACATTTTAAATG  |
| SJHQ | SJLGG011 | chr11 | 96956270  | 5  | 40 | 0 | 46 | C | T | TTTTAGTCTGGCTTGA[A/C]TCTTTCGAAATTTGAACATTT    |
| SJHQ | SJLGG011 | chr11 | 96958741  | 6  | 41 | 0 | 47 | A | T | TTGCTTTAAGGGGAACAAA[A/T]CTAAAAGAGTGTCTGTAGA   |
| SJHQ | SJLGG011 | chr12 | 20184629  | 7  | 50 | 0 | 36 | C | A | CATGTATACAACTGATGA[C/A]TTTACTGTTCAGATCATGT    |
| SJHQ | SJLGG011 | chr13 | 102870134 | 6  | 37 | 0 | 30 | C | A | TGTGAGGTCCACCGTGAAG[C/A]GCTACAGCTGAGATGGCCCC  |
| SJHQ | SJLGG011 | chr13 | 47614675  | 8  | 43 | 0 | 28 | C | T | ATTCCTTAGCACATACTGA[C/T]GAAAGGGGAAAAAATAACT   |
| SJHQ | SJLGG011 | chr13 | 69493800  | 6  | 38 | 0 | 28 | A | C | ATAAAAAGGACATAAACCCTT[A/C]AATATAAACCTAGTGACAG |
| SJHQ | SJLGG011 | chr13 | 76492321  | 6  | 35 | 0 | 40 | A | G | GTACTTAATGCCCTAAAGAA[A/G]GAGTGAGGAACATCAATTC  |
| SJHQ | SJLGG011 | chr13 | 89275440  | 5  | 20 | 0 | 36 | G | A | CAGAAAATGGAAAATATA[A/G]GAAAGGAGCCATAATCCTT    |
| SJHQ | SJLGG011 | chr13 | 90799751  | 18 | 51 | 0 | 31 | A | T | TGAAGAAAATAAACAATG[A/T]AGGCAATTTTAAAGCACTT    |
| SJHQ | SJLGG011 | chr14 | 43054225  | 8  | 42 | 0 | 45 | T | C | AAGTAAAAGTGATAAACCCTA[T/C]TGGTCTTTGAAAAAATA   |
| SJHQ | SJLGG011 | chr15 | 30328513  | 9  | 45 | 0 | 29 | A | G | CAAAATGTGTATGAAAAT[C/A]GCAGTCACTCACTAATGAAA   |
| SJHQ | SJLGG011 | chr15 | 39040298  | 4  | 38 | 0 | 51 | A | G | CAGAAAATCCTTTTGCAGAA[A/G]ATCTTTAAGCCGAAAGAA   |
| SJHQ | SJLGG011 | chr15 | 57282626  | 9  | 55 | 0 | 42 | A | G | TATAGACTTGTAGTTATAGG[A/G]TAAATGATGCCAAAGCTTT  |
| SJHQ | SJLGG011 | chr1  | 63572646  | 8  | 43 | 0 | 32 | T | C | ATAGGAATATAATGATCTCA[T/C]AGTGTAGATGATTTAACATA |
| SJHQ | SJLGG011 | chr16 | 5842134   | 10 | 44 | 0 | 29 | C | T | GTGGATAAGTATTTTAAAG[C/T]CCGGGACCCAGCTAAGGG    |
| SJHQ | SJLGG011 | chr16 | 6376062   | 10 | 48 | 0 | 29 | C | T | CATATGCATTGGCAGAAAAT[C/T]GGTTAACTCTTATGAACT   |
| SJHQ | SJLGG011 | chr16 | 80392734  | 7  | 50 | 0 | 38 | C | G | ACGCTCAGCAGTGAAGGCA[C/G]CACCAGGTGATCTGATGTG   |
| SJHQ | SJLGG011 | chr16 | 85814946  | 13 | 42 | 0 | 35 | G | A | TTCAACTGTTTACAAAAG[G/A]CACAGTCAACACCCTGAGA    |
| SJHQ | SJLGG011 | chr1  | 72638236  | 9  | 49 | 0 | 38 | A | C | AAAAATCCATTTTTCATCAT[A/C]AAAAATGGATTTCAAAAAA  |
| SJHQ | SJLGG011 | chr1  | 72641055  | 7  | 41 | 0 | 26 | C | T | GTCATATCAGAAGTTATCA[C/T]TGGCTCCAGCATTTCAAATTA |
| SJHQ | SJLGG011 | chr17 | 33062928  | 7  | 48 | 0 | 34 | G | A | TTGGGTCTGGAGTATGTGAG[G/A]AAGAGTAGACCAGACCTTGG |
| SJHQ | SJLGG011 | chr18 | 55609287  | 7  | 42 | 0 | 38 | G | C | ACAAAAGGCGGTGACCCAGT[G/C]CAAGATTTTCAAAGAGCAC  |
| SJHQ | SJLGG011 | chr18 | 6606733   | 4  | 29 | 0 | 32 | A | C | TAACAGATATACTGAGCACA[A/C]TATCATCAATGTTCTGGAGT |
| SJHQ | SJLGG011 | chr20 | 22215651  | 7  | 51 | 0 | 32 | G | A | AAGACACATTTCTGGAGCA[G/A]CTGCTATTGCTCAATATGA   |
| SJHQ | SJLGG011 | chr20 | 61719369  | 6  | 40 | 0 | 30 | G | A | CCTGGGACGCTCCTCTCC[G/A]TTTCTTACAGAGCTGGCTCCA  |
| SJHQ | SJLGG011 | chr2  | 117561378 | 4  | 32 | 0 | 38 | T | A | GATGACCTACAGGATACAG[T/A]JGGAGCTCTGGTCCAAATGG  |
| SJHQ | SJLGG011 | chr21 | 25916590  | 11 | 51 | 0 | 25 | C | T | TCAACTCTATGATTTAAACA[C/T]ATTTCCAGAGCTCCCAATTA |
| SJHQ | SJLGG011 | chr2  | 208521298 | 7  | 39 | 0 | 36 | A | C | GTGGGATCTGACTGCTTTG[C/A]CTTGTCTATATACATCAATC  |
| SJHQ | SJLGG011 | chr22 | 22758577  | 8  | 30 | 0 | 31 | G | A | GAGCACAGAAGGAGGACT[C/G]AGCAATCTTCATCATGACC    |



|      |          |       |           |    |    |   |    |   |   |                                                 |
|------|----------|-------|-----------|----|----|---|----|---|---|-------------------------------------------------|
| SJHQ | SJLGG011 | chr2  | 236866491 | 6  | 37 | 0 | 47 | C | T | CTTGAGTTCACAGGGGGCTTC[C]TAGCCCTCAACTGATTTCCCTC  |
| SJHQ | SJLGG011 | chr2  | 40621337  | 8  | 39 | 0 | 22 | C | A | AGTGAGCTTAAAGTTGAGAAA[C/A]CCTGCACATAACATTAAGAAC |
| SJHQ | SJLGG011 | chr2  | 40972634  | 8  | 41 | 0 | 25 | G | A | CCTCCAGTTTTTCGAGGACC[G/A]TAGGCTACATCTTCAGCTCC   |
| SJHQ | SJLGG011 | chr2  | 77241155  | 7  | 54 | 0 | 36 | T | C | CATATGGAACTAAAGTAA[T/C]AAATCTTCACTGTGTGT        |
| SJHQ | SJLGG011 | chr3  | 153128669 | 8  | 55 | 0 | 32 | A | G | TTATTCTGTGAAGCCAAT[G/A]GAGATAACCATGTTTGTGAG     |
| SJHQ | SJLGG011 | chr3  | 164272044 | 6  | 32 | 0 | 30 | A | T | GAATTTAATTAATACTACTAT[C]TAGACATTTTTCACCTTTAA    |
| SJHQ | SJLGG011 | chr3  | 95531613  | 5  | 37 | 0 | 43 | T | C | GAGATAGTGACAGAGTGGCTT[C]GTATGCTTTGGCCTAGTCA     |
| SJHQ | SJLGG011 | chr3  | 96876236  | 7  | 57 | 0 | 39 | T | G | TGTTTTCTTTGGTATAATTT[G]GCTAGAAGAGTCAATATATA     |
| SJHQ | SJLGG011 | chr4  | 109710803 | 8  | 57 | 0 | 34 | G | A | TTCTCCCAATGCAAAACAC[G/A]GAGCCAGTTTCCCTCAAGGC    |
| SJHQ | SJLGG011 | chr4  | 188461219 | 9  | 60 | 0 | 37 | T | C | AATGTCGTTAGTCTAGAAAATTT[C]GAAGAAATGAAGAAAATCTG  |
| SJHQ | SJLGG011 | chr4  | 35404897  | 4  | 29 | 0 | 34 | C | G | AGAATTTGGGAAAATATTGA[C/G]TATTACAAAATGTCATAATT   |
| SJHQ | SJLGG011 | chr4  | 47515333  | 14 | 50 | 0 | 40 | A | G | TTATGACAAATCTCCTGTG[A/G]GTTTAGGCACGAAGGAAAT     |
| SJHQ | SJLGG011 | chr5  | 20302396  | 7  | 39 | 0 | 33 | G | C | AGTTCTTCATCTTTTTAA[A/G]TTGAATAAACTTAACGTCAA     |
| SJHQ | SJLGG011 | chr5  | 23670872  | 17 | 43 | 0 | 34 | C | T | TTACAATGATATAATAGCAG[C/T]TAGCTTAGCTAATCTTCA     |
| SJHQ | SJLGG011 | chr5  | 26371638  | 8  | 53 | 0 | 30 | A | T | TTTCTCATGAACCTCAA[A/T]TATCTGTTTTTCTGACATCA      |
| SJHQ | SJLGG011 | chr5  | 51311475  | 7  | 38 | 0 | 33 | G | T | CAAGCAATGTACCAGTAT[G]TCCACTACAATACCACATG        |
| SJHQ | SJLGG011 | chr5  | 58218810  | 7  | 44 | 0 | 33 | C | A | TGTGAAAATGCCTGCTGTT[C/A]ATGTTCTGGCAGATCTGCA     |
| SJHQ | SJLGG011 | chr5  | 84632932  | 8  | 37 | 0 | 21 | C | T | ACTCCTATCTTTATAACAC[C/T]GCTTACTTCAATAGTACA      |
| SJHQ | SJLGG011 | chr6  | 103715025 | 8  | 46 | 0 | 38 | C | A | GCAATGTGGTTTTCTCTCAA[C/A]CTCAGATATCTCAACTTTT    |
| SJHQ | SJLGG011 | chr6  | 121258072 | 10 | 58 | 0 | 47 | A | G | TTGATCTTTTCTATTCTCC[A/G]TCAATCTTATTTCTGGT       |
| SJHQ | SJLGG011 | chr6  | 124037239 | 12 | 56 | 0 | 35 | T | A | AAAAGAGCTGCTAATACAA[A/T]TATCATGCTTACAAGGAG      |
| SJHQ | SJLGG011 | chr6  | 124498711 | 5  | 34 | 0 | 39 | T | G | TACAAAAAATTAATCCCTA[T/G]TTGAATCTGTCATAGCA       |
| SJHQ | SJLGG011 | chr6  | 28982652  | 17 | 40 | 0 | 32 | C | T | CCTAGGGAATGTTTTGTTA[C/T]GACCCCTGAGCGGTTGCCGC    |
| SJHQ | SJLGG011 | chr6  | 51409077  | 9  | 48 | 0 | 34 | G | T | TGTAATTTATACATCTATA[G/T]TTAAGATCACTTTACCTTCA    |
| SJHQ | SJLGG011 | chr6  | 63275606  | 7  | 27 | 0 | 27 | G | A | GGAAATATCACAATTTTT[C/G]ATGATGTTTTCAAAAAATTC     |
| SJHQ | SJLGG011 | chr6  | 81765593  | 8  | 50 | 0 | 33 | G | T | GTGGCTTCTTAAGAGGCA[G/T]TATGGTTGGAATCTTAAGA      |
| SJHQ | SJLGG011 | chr6  | 87490214  | 7  | 37 | 0 | 33 | A | T | CAAGTTTCTAGCTGATCT[A/T]AGCTGCAAAAATACCAGATG     |
| SJHQ | SJLGG011 | chr6  | 96625004  | 7  | 56 | 0 | 36 | C | G | TACTCCTCACTAGATCAA[C/G]CCAGAGAACTCCCTCAATC      |
| SJHQ | SJLGG011 | chr6  | 98144887  | 11 | 42 | 0 | 30 | T | A | GCTAGAAAACCTAGAACCC[C/T]AAGATGATGAAGTGAATGTC    |
| SJHQ | SJLGG011 | chr7  | 81069796  | 7  | 42 | 0 | 26 | C | A | GTATCTGTCTAAGATATAT[C/A]TATAAATAGGATACAGCA      |
| SJHQ | SJLGG011 | chr8  | 123551807 | 9  | 28 | 0 | 25 | G | A | AGGCAATCCTAAGCAGCTGC[G/A]TCCCTCCAGCCACTTTAC     |
| SJHQ | SJLGG011 | chr8  | 1364958   | 5  | 22 | 0 | 28 | C | T | CCTGGGGGCGGAATGTGGCT[C/T]GCGGACCCCGTCCCGGCT     |
| SJHQ | SJLGG011 | chr8  | 92243092  | 8  | 40 | 0 | 34 | C | T | CAAGCAAGGAGAAAAGAC[C/T]AAATTAATTTATAAGACTA      |
| SJHQ | SJLGG011 | chr9  | 16354308  | 11 | 53 | 0 | 41 | C | T | CCATAGTCAAATGAACTAC[C/T]GACTGTCTCCAGGTATATGC    |
| SJHQ | SJLGG011 | chr9  | 4427158   | 9  | 37 | 0 | 29 | G | A | TTTATGATGGTGAGAGGC[G/A]TAGGACAGTAAGTTGGATG      |
| SJHQ | SJLGG011 | chr9  | 76503844  | 9  | 52 | 0 | 40 | G | T | GGATTAATAAGAAAAGAA[A/G]TTTAAAGTTAACTCTGGT       |
| SJHQ | SJLGG011 | chr9  | 84849138  | 10 | 50 | 0 | 37 | C | T | CACTGAATTTCTAGCACCT[C/T]GTTAGACTTGAACAATGAGG    |
| SJHQ | SJLGG011 | chrX  | 128457168 | 11 | 58 | 0 | 31 | G | A | CTTCGTCATGAGTATGTC[G/A]CAAGCTTCCCGACGCCCAT      |
| SJHQ | SJLGG011 | chrX  | 51985180  | 4  | 35 | 0 | 41 | T | C | AGTTTTTAAAGCACAGACA[T/C]GTTCTTAATATTCTTGAAG     |
| SJHQ | SJLGG011 | chrX  | 79501704  | 7  | 35 | 0 | 29 | T | A | CCTGGAAGGCAATACAAACTT[A/T]GCCCTCACAAGCAAGGCTA   |
| SJHQ | SJLGG012 | chr10 | 10089272  | 15 | 55 | 0 | 31 | C | T | TAGTCATGCTCCACCTTT[C/T]GTTGTAGTGGTACCTCTC       |
| SJHQ | SJLGG012 | chr10 | 10192903  | 13 | 46 | 0 | 30 | C | T | GGTCTTCCACTGAGGCTC[C/T]GAAGACCACTGAGGCAAATA     |
| SJHQ | SJLGG012 | chr10 | 109250424 | 8  | 26 | 0 | 32 | A | G | GAATGAGCAGCAAGATTT[A/G]TCTGCACTGATTGAAGCAG      |
| SJHQ | SJLGG012 | chr10 | 117918401 | 13 | 39 | 0 | 22 | A | T | TGAGCCTCAACACAGTCT[C/A]TGCCCTATGAGCCATGCACA     |
| SJHQ | SJLGG012 | chr10 | 120179064 | 5  | 26 | 0 | 27 | A | G | TCTCAATATGGGCTTTTAA[A/G]TGTATTTTATCCTATTCTT     |
| SJHQ | SJLGG012 | chr10 | 35082852  | 13 | 55 | 0 | 37 | A | G | GATACCTCAATAGAGGT[A/G]AGTATCTCATTAAAGAAA        |
| SJHQ | SJLGG012 | chr10 | 45729230  | 12 | 40 | 0 | 29 | G | A | TATATATTACAGCTTAAACGC[G/A]GCACCTGGATTAATGGCAAT  |
| SJHQ | SJLGG012 | chr10 | 52982359  | 5  | 45 | 0 | 59 | G | A | TTGTTTCATAAATAACTCT[G/A]GCCCAAAGTTTAAAGTAATGGA  |
| SJHQ | SJLGG012 | chr10 | 66592045  | 6  | 33 | 0 | 33 | G | A | AAGTTATTTGATAAATA[A/G]AACAATGTGAGCTAACTCAG      |
| SJHQ | SJLGG012 | chr1  | 113707119 | 11 | 45 | 0 | 31 | T | G | TAAGTATGCTGTTTTGAAAG[T/G]GGGACAAGGAGCAGCCTCAG   |
| SJHQ | SJLGG012 | chr11 | 13814353  | 14 | 34 | 0 | 33 | C | T | GCAGGTCGTAATAGGGA[A/C]TGAAGCAAAGGTCAGGAGGA      |
| SJHQ | SJLGG012 | chr11 | 39347053  | 9  | 42 | 0 | 40 | G | A | CTTTTTCTGCCATTATTAC[G/A]TTCAAGCAAATTAATGTTA     |
| SJHQ | SJLGG012 | chr11 | 50117415  | 9  | 37 | 0 | 29 | T | A | TCATGAAAGATAGATTAG[A/T]ATGATGCTTCAATTTCAAT      |
| SJHQ | SJLGG012 | chr1  | 179317166 | 8  | 44 | 0 | 32 | C | T | TTCAATTTGAAATGGAC[C/T]GTCTAGTCTGTGAGGAATGA      |
| SJHQ | SJLGG012 | chr11 | 7971380   | 9  | 40 | 0 | 36 | G | T | GCTAAGTGTATCCCATTT[G/G]TAGTTAGAAATCTGATGTTT     |
| SJHQ | SJLGG012 | chr1  | 187676095 | 12 | 42 | 0 | 28 | G | T | AAAGGTAATGATATACCAA[G/T]GATTTGCCACTGCTTCAGTG    |
| SJHQ | SJLGG012 | chr1  | 197958748 | 24 | 73 | 0 | 28 | C | T | ATCCTGAGCCTCTGACCT[G/A]TAAATTAATGCAACTGTCA      |
| SJHQ | SJLGG012 | chr12 | 119769515 | 16 | 47 | 0 | 18 | G | A | GCCCCCAAAGCACTAAAT[C/G]ATTTCTAGAAAATCTTCTGTT    |
| SJHQ | SJLGG012 | chr12 | 133126901 | 4  | 20 | 0 | 26 | C | T | GGGAGAGCAGAGAGGCTGG[C/T]GGGGCGGGGACGGAGAAGGC    |
| SJHQ | SJLGG012 | chr12 | 18844927  | 20 | 52 | 0 | 34 | T | C | AAAGTGGCTAGGTCCTGAA[G/T]CAGAGTGGAGTGTAGCTTCC    |
| SJHQ | SJLGG012 | chr12 | 2236524   | 6  | 43 | 0 | 30 | T | C | GCAGTGAAGTGTGTTTTT[C/T]TATATCAGGTTTGGCTAAG      |
| SJHQ | SJLGG012 | chr1  | 232436681 | 8  | 34 | 0 | 35 | G | A | GAACCTGTGTTGAAAAAC[G/A]TCAAGGAGGAAAAAAGTG       |
| SJHQ | SJLGG012 | chr12 | 73822208  | 13 | 41 | 0 | 28 | C | T | GCCAGCTAAATATCTTTA[C/T]ATCATAAATCTGTAATGATG     |
| SJHQ | SJLGG012 | chr1  | 29772118  | 12 | 44 | 0 | 29 | G | T | GGAACCTGGGGAATCGGCA[G/T]AAAAATCTGCCTGACTCT      |
| SJHQ | SJLGG012 | chr13 | 34728233  | 9  | 30 | 0 | 52 | G | A | ATTGAAAAATCCTCCACC[G/A]GCTAATTAATGAAACAAAGTGC   |
| SJHQ | SJLGG012 | chr13 | 38157406  | 13 | 47 | 0 | 16 | C | T | TATTTATTATAATTTGACA[C/T]CCTTACTGTCCAAATTTGA     |
| SJHQ | SJLGG012 | chr14 | 20318056  | 10 | 59 | 0 | 44 | G | A | GTCTACTAAAATGACTGAC[G/A]TATATAAAAAGAGTTCTGGGA   |
| SJHQ | SJLGG012 | chr14 | 65183436  | 6  | 30 | 0 | 34 | C | T | CGGACCCCGACCTGGCAC[C/T]ACCACTCATAGTTTCAGAGC     |
| SJHQ | SJLGG012 | chr15 | 41252224  | 16 | 42 | 0 | 26 | G | A | AGTGGCTGACGCTCTGGGG[C/G]ACTGGGAGGAGGCAAGGAGC    |
| SJHQ | SJLGG012 | chr15 | 86415981  | 9  | 41 | 0 | 27 | G | A | AATATAAGACTGGTCAGCC[G/A]CCAACTAGAGGAGATGAGT     |
| SJHQ | SJLGG012 | chr15 | 96573886  | 16 | 52 | 0 | 39 | C | T | TAATGAAAAATACAGTAAA[C/T]GGAGACAAGATACTATTTT     |
| SJHQ | SJLGG012 | chr17 | 72270722  | 5  | 24 | 0 | 27 | C | G | GACCTGCAGCCTCTGTAC[C/G]CTGCTCATAACCTCCTAC       |
| SJHQ | SJLGG012 | chr17 | 8552772   | 17 | 56 | 0 | 25 | G | A | ACAGTTTTGGTACTGCCT[C/G]ATCTGTCTCCCTAGACCTGGC    |
| SJHQ | SJLGG012 | chr18 | 44204280  | 9  | 30 | 0 | 18 | A | C | ACGGCAAGGAGAGATT[C/A]CGGGGGCTGCCCTGGGGGT        |

|      |          |       |           |    |    |   |    |   |   |                                                |
|------|----------|-------|-----------|----|----|---|----|---|---|------------------------------------------------|
| SJHQ | SJLGG012 | chr18 | 60233771  | 9  | 43 | 0 | 31 | T | G | TTCCATACTGCTGCCGTG[T/G]TGTTCCTAAAATACCATT      |
| SJHQ | SJLGG012 | chr18 | 69744245  | 14 | 46 | 0 | 32 | C | T | CACCATAATTTACCACCTA[C/T]GTTTACTTCTATCGCTATG    |
| SJHQ | SJLGG012 | chr20 | 12514662  | 11 | 44 | 0 | 27 | G | T | GTACATACAATCAAGCCTT[G/T]TCCTCACCGATTAAGAGGCC   |
| SJHQ | SJLGG012 | chr20 | 24303447  | 13 | 53 | 0 | 38 | G | A | AGAAACAAGATCTGTGAAGC[G/A]GGTCCAGATGTGAGGTGG    |
| SJHQ | SJLGG012 | chr20 | 5356933   | 14 | 41 | 0 | 36 | G | A | GGTAAGTCAGTAAAATAT[C/G]ATGCATAAGGATTTGTAAGGA   |
| SJHQ | SJLGG012 | chr20 | 6459134   | 9  | 27 | 0 | 32 | C | A | GGCTGGCATGAGAGAAAAA[C/C]AAAAGAAAAGAGAGACAGG    |
| SJHQ | SJLGG012 | chr2  | 103015384 | 7  | 35 | 0 | 33 | T | C | CACCTCTCTTTTTAAATG[T/C]CAAATGCCCTGCACCTACC     |
| SJHQ | SJLGG012 | chr21 | 24026591  | 8  | 37 | 0 | 22 | C | G | TGTAGCAGTTTGCCATAGAT[C/G]AAGCATAAAGGCTGGAAGGG  |
| SJHQ | SJLGG012 | chr21 | 24914692  | 14 | 48 | 0 | 31 | C | A | TGTGAAATTTGTAACAAGA[C/A]CACACAGTAAACTTTATCCA   |
| SJHQ | SJLGG012 | chr2  | 15424862  | 10 | 46 | 0 | 41 | C | G | GATTTCTAATACTATGTTAC[C/G]AAGTTAAGATTAATAGTAAA  |
| SJHQ | SJLGG012 | chr2  | 169613210 | 14 | 47 | 0 | 34 | C | T | CCTCCATCATAATGTGGGGA[C/T]GGATCGGCTCTGAGCATAAG  |
| SJHQ | SJLGG012 | chr2  | 217655273 | 6  | 32 | 0 | 27 | G | A | CCTCTGCCCCCGCCTCC[C/G/A]CCTCCACCTCCCGAGGTCT    |
| SJHQ | SJLGG012 | chr22 | 35715116  | 6  | 29 | 0 | 40 | G | A | GGAAGGAGTGGTGGGCGAG[G/A]TCAGAAGAAAAGAACGAGGA   |
| SJHQ | SJLGG012 | chr2  | 51984614  | 15 | 33 | 0 | 35 | T | C | TTGGAGTTTTAGGAACATT[C/T]CGTTAAGCTACTGTATGA     |
| SJHQ | SJLGG012 | chr2  | 80190963  | 9  | 39 | 0 | 27 | G | T | GCACAGCCAAACCCCTGCCA[G/T]GTAGACCTTTGGAAATTTGA  |
| SJHQ | SJLGG012 | chr3  | 13251096  | 10 | 31 | 0 | 19 | G | C | CTCCATGTGCCTGGGGCTA[G/C]GCTCTCCCTGCAGCACACC    |
| SJHQ | SJLGG012 | chr3  | 157223187 | 7  | 42 | 0 | 29 | C | T | GGCAGAAATGCAACAGCAAC[C/T]AGATATTACACCTGTTTGTG  |
| SJHQ | SJLGG012 | chr3  | 175281466 | 10 | 58 | 0 | 29 | C | T | GAGACAAAAGAAATCTCTG[C/T]CTCAAAAACATGTAGGAGA    |
| SJHQ | SJLGG012 | chr3  | 184222075 | 13 | 50 | 0 | 37 | G | A | ATGTGGCAATTTCTGTCTAC[G/A]CTTTTTGTATTTTTCAAAT   |
| SJHQ | SJLGG012 | chr3  | 27357650  | 7  | 26 | 0 | 37 | C | T | ACCGTGATACCCAATGAAA[C/T]GTGTGAGCAAGGACTGGCC    |
| SJHQ | SJLGG012 | chr3  | 38813116  | 9  | 46 | 0 | 28 | A | T | AATAGATGGAGTGGGGAGG[G/A]TGTGTGTGGCTGGGACAGCC   |
| SJHQ | SJLGG012 | chr3  | 77041768  | 12 | 48 | 0 | 31 | C | T | TATATGAAATTTGGCATAA[C/T]GTCAATTTTTCTCAAAAAT    |
| SJHQ | SJLGG012 | chr3  | 95451447  | 13 | 40 | 0 | 32 | G | T | AAAAAATAATAAATAA[A/G]TAAATAAGAAAAGTAAAAAT      |
| SJHQ | SJLGG012 | chr4  | 13462651  | 4  | 25 | 0 | 29 | A | G | CATTCAAGATAAATCCAGCA[A/G]CTAAGATGCAATGCAAGCTA  |
| SJHQ | SJLGG012 | chr4  | 162503394 | 8  | 34 | 0 | 42 | C | A | TTGTTTTATTATGAATTA[G/C]AATAATTTGTAAGATAAATATT  |
| SJHQ | SJLGG012 | chr4  | 190075813 | 13 | 50 | 0 | 24 | C | T | TATTTACACCTGGGAGT[C/T]GTGGAGGCCCTGGGAAAAG      |
| SJHQ | SJLGG012 | chr5  | 101069290 | 11 | 39 | 0 | 29 | C | A | GCAAAATAATGTTGGTAAA[A/C]CTTATCCCATCTTCCAAG     |
| SJHQ | SJLGG012 | chr5  | 102667515 | 14 | 54 | 0 | 28 | T | C | AGTTAACCCACGCCCTAAT[T/C]CCCAATCTTGTCTCAATC     |
| SJHQ | SJLGG012 | chr5  | 162540619 | 18 | 43 | 0 | 31 | C | T | ATCACTCTGTTTTGAAGAC[C/T]GTGTGTAAGAAATTAAGTGA   |
| SJHQ | SJLGG012 | chr5  | 169476922 | 15 | 55 | 0 | 27 | C | T | ACATGGCCCATACAGGCAA[C/T]GGGAAATGTTGTGGCCATG    |
| SJHQ | SJLGG012 | chr5  | 27988228  | 19 | 47 | 0 | 27 | T | A | CATTTCTCCTGTTTCTATT[G/T]TTTATTAAACAACCTAA      |
| SJHQ | SJLGG012 | chr5  | 50487457  | 15 | 58 | 0 | 43 | G | T | TTAGCAGTCACTAGCCCTT[G/T]GTCTATATTTCTATTGATTA   |
| SJHQ | SJLGG012 | chr6  | 123316272 | 12 | 36 | 0 | 31 | A | G | TCCTACATTAATTTGCATTA[A/G]TTAATAATAAATGCTCTA    |
| SJHQ | SJLGG012 | chr6  | 132332819 | 18 | 44 | 0 | 26 | T | C | ATTTTTGAAAACCTGTAGTTT[T/C]GTACATTTGGTAAGGCCATG |
| SJHQ | SJLGG012 | chr6  | 132968287 | 11 | 32 | 0 | 35 | T | C | GCACACAACCTTTTAGTGT[T/C]TAAGTTCTGAAATCCAATA    |
| SJHQ | SJLGG012 | chr6  | 142954429 | 11 | 48 | 0 | 30 | T | C | AAATTTGGACTATGTATCTA[T/C]TAACTAACATTTCTGGA     |
| SJHQ | SJLGG012 | chr6  | 169363684 | 11 | 47 | 0 | 27 | T | C | GTCAACCAACATAGAGGCA[T/C]GGAAAGATTATAGAAGAAGT   |
| SJHQ | SJLGG012 | chr6  | 98725506  | 13 | 49 | 0 | 28 | T | C | ACAACCCCAAGATGTGAAA[T/C]TATATCAATCAGGCCATTT    |
| SJHQ | SJLGG012 | chr7  | 135521483 | 11 | 49 | 0 | 30 | C | T | AGGAACATGTGCTGTAGG[C/T]GCAGGGCCATGACACAGAGA    |
| SJHQ | SJLGG012 | chr7  | 145349415 | 12 | 36 | 0 | 34 | G | A | TCAGGGACACCCGCTGCTC[G/A]TACTCTTTTCTGCTCAGA     |
| SJHQ | SJLGG012 | chr7  | 30643261  | 21 | 56 | 0 | 34 | G | A | TTCAAGTTTAATGACTGTT[G/A]CATTCCCATATGCTGACC     |
| SJHQ | SJLGG012 | chr7  | 50367611  | 7  | 30 | 0 | 30 | C | T | AGCAATCCTGCCAGGGAC[G/C]GTCTCTGCACTGTCTCTG      |
| SJHQ | SJLGG012 | chr7  | 68501822  | 11 | 47 | 0 | 29 | C | G | CTTATCCATAGACATAAAA[C/G]AACTGTGTTTTGCTTGGTA    |
| SJHQ | SJLGG012 | chr7  | 8487325   | 14 | 52 | 0 | 34 | T | A | GAAAAGTGAATGTTGCCCT[A/G]AGAGTGTTTAATCTGCGCTT   |
| SJHQ | SJLGG012 | chr7  | 93639634  | 6  | 42 | 0 | 33 | G | A | TGTAGCAAGGAGTTATGCG[G/A]GATAAGAATTTGTAAGG      |
| SJHQ | SJLGG012 | chr8  | 105038448 | 8  | 39 | 0 | 38 | A | T | TAATGTGCTAATACATTTCTA[T/C]ATATTTCAATGATGTGTA   |
| SJHQ | SJLGG012 | chr8  | 11871649  | 10 | 37 | 0 | 40 | C | G | ACCCAGGAGGCCAGCCTGG[C/G]TACGCAGCCCCATCCACAC    |
| SJHQ | SJLGG012 | chr8  | 32408060  | 8  | 40 | 0 | 27 | C | T | ATGAATTAAGAGGGGCCAG[C/T]GGTCTGAAATGATGATCCTGT  |
| SJHQ | SJLGG012 | chr8  | 70492156  | 9  | 41 | 0 | 34 | C | T | AAACCTAAGAAAATAATGA[C/T]GGAACCTGAAATATGACTA    |
| SJHQ | SJLGG012 | chr8  | 71962037  | 12 | 55 | 0 | 31 | G | A | TTACATAAAGAGAAAAT[G/A]GGAGGGCCTCCAGGCAAGA      |
| SJHQ | SJLGG012 | chr9  | 24382489  | 16 | 46 | 0 | 28 | A | T | GAGAACTAAAAGATTGAGTT[A/T]ATAGTCAGAGGAATAATA    |
| SJHQ | SJLGG012 | chr9  | 25908089  | 8  | 39 | 0 | 20 | G | C | TCTAACACTATATGTAGG[G/C]ATGTGTTGTTGTCAGTTAGG    |
| SJHQ | SJLGG012 | chr9  | 71089212  | 10 | 35 | 0 | 21 | A | G | TATAGTTTTCTAATTTGACA[A/G]ATTTGATTTGCTATCTG     |
| SJHQ | SJLGG012 | chr9  | 72915727  | 11 | 37 | 0 | 40 | G | A | TAAGTTTTGGGCACATAAAA[G/A]GATGAAAGATAAAAACTA    |
| SJHQ | SJLGG012 | chr9  | 73288458  | 7  | 44 | 0 | 32 | C | T | ACACAGTAATGCTCAGGCA[C/T]TTTATGTCTAAAATAGATG    |
| SJHQ | SJLGG012 | chrX  | 124942276 | 14 | 29 | 0 | 16 | T | A | TCCTCACTTTCTCTCTTAG[T/A]TTTCAAAGGCTTTAGGTGA    |
| SJHQ | SJLGG012 | chrX  | 142621258 | 9  | 15 | 0 | 12 | G | A | CCCTCATGTGCTCACTGCT[C/G]AAGCTGTCTCAAGCACTGTG   |
| SJHQ | SJLGG013 | chr1  | 169262569 | 4  | 29 | 0 | 32 | T | G | AAAAAAAATTTAGTCAGT[T/G]CAGTTTCAAATGATTAATTT    |
| SJHQ | SJLGG013 | chr14 | 39917320  | 13 | 66 | 0 | 34 | C | T | AGGCTGCAGGTTTTCCATGA[C/T]GTTTCATAGGGAATTTTCA   |
| SJHQ | SJLGG013 | chr15 | 71766207  | 11 | 40 | 0 | 31 | C | T | CATAGTCAGTATCACCTGGG[C/T]ACATTTACTTACCAGCCC    |
| SJHQ | SJLGG013 | chr22 | 47166853  | 4  | 26 | 0 | 28 | C | T | CCTTCTGTGACGGGGGCC[C/T]GGAAAGCTGTGGGGTGGAGA    |
| SJHQ | SJLGG013 | chr7  | 137548694 | 4  | 31 | 0 | 41 | A | T | GGAATGCTTACATGAGTCA[A/T]AATGTGAGTGAATGTCTCAA   |
| SJHQ | SJLGG013 | chr7  | 52959796  | 4  | 39 | 0 | 43 | T | C | ACTGGTTATACACCTGTTCT[T/C]AGGGAGAGACACTGCTGAGA  |
| SJHQ | SJLGG013 | chr8  | 106590902 | 7  | 51 | 0 | 37 | T | C | ACTTCACTGGATATAATA[T/C]TAATACTATCTTGGTAAGAG    |
| SJHQ | SJLGG013 | chr8  | 29996969  | 10 | 44 | 0 | 30 | C | T | GTGTCAAGGATCTAGAAGAG[C/T]GCCCTAGGCACTCCTCAAG   |
| SJHQ | SJLGG013 | chr8  | 76628513  | 11 | 48 | 0 | 32 | A | T | ATTGGCCCCGTGATCACAA[A/T]GCTGATTAGAATGTGTTAGA   |
| SJHQ | SJLGG013 | chr9  | 28463284  | 16 | 55 | 0 | 36 | C | T | TTTAGTGTGAAGAAATTTAT[C/T]AAATCTCTTTGTCTGATGC   |
| SJHQ | SJLGG013 | chrX  | 3529265   | 10 | 55 | 0 | 41 | C | T | TGGAGGGCTCTCATTACCA[C/T]GTCTTTTCCAGGTTGGTTC    |
| SJHQ | SJLGG015 | chr1  | 106654928 | 7  | 67 | 0 | 41 | C | T | CTTTTATCTCCGAAGAAGA[C/T]GCAGCTTAAAGTAATCATA    |
| SJHQ | SJLGG015 | chr13 | 55478649  | 18 | 71 | 0 | 47 | T | C | TTTTCCCCATATTGATTA[G/T]ATAGCAGTAAAGTTGGATTTA   |
| SJHQ | SJLGG015 | chr13 | 86355735  | 12 | 63 | 0 | 49 | G | A | CAAGATCTTTGAACTGATG[G/A]TTTGAATATATTAGGAAAA    |
| SJHQ | SJLGG015 | chr14 | 81256642  | 21 | 69 | 0 | 42 | A | T | TATTAATAAAGAAATGAAA[A/T]AAAATGGAAACATTGAGAAA   |
| SJHQ | SJLGG015 | chr17 | 54680891  | 14 | 66 | 0 | 43 | C | T | GTTCTATCTGGGCTCCAAG[C/T]ATACCAAGAGTTGAGAGTCC   |
| SJHQ | SJLGG015 | chr17 | 74749241  | 15 | 62 | 0 | 50 | C | T | GCCAATCGAGAGTACAGTAC[C/T]GTGCAAAAGTCTTGGTTCT   |

|      |          |       |           |    |     |   |     |   |   |                                                |
|------|----------|-------|-----------|----|-----|---|-----|---|---|------------------------------------------------|
| SJHQ | SJLGG015 | chr18 | 34472293  | 12 | 55  | 0 | 34  | G | A | AGTCTTTGAAATAGTTTTGG[G/A]AAAGTAAAAACCTAAAGTT   |
| SJHQ | SJLGG015 | chr20 | 13703787  | 16 | 81  | 0 | 45  | T | C | GACTTGTCCCATATAAAC[T/C]CTCCAGGAGGGTTTAGTTG     |
| SJHQ | SJLGG015 | chr21 | 25671958  | 12 | 62  | 0 | 29  | A | G | TAACTGAGAACCTAGTAAG[A/G]TTATGGAAGAGCCTCCTGTT   |
| SJHQ | SJLGG015 | chr21 | 31214723  | 7  | 60  | 0 | 43  | G | A | ATGGAGAAATAAAGGAAGC[G/A]AAGAAAAGATCTCTGTACTA   |
| SJHQ | SJLGG015 | chr21 | 31938986  | 19 | 65  | 0 | 31  | A | T | AATTGTTGAAAAGACCTGTG[A/T]TAAAGAACATTTCTGTTTT   |
| SJHQ | SJLGG015 | chr2  | 154149105 | 10 | 49  | 0 | 30  | G | A | AGTTGCGAGGAGCAGTTGG[G/A]GTTCAGTGGGAGCAGATCAG   |
| SJHQ | SJLGG015 | chr2  | 209930193 | 11 | 52  | 0 | 41  | C | T | ATTGAGATCTTTTTAAAC[C/T]AAAATACCAGAATCTTTTGC    |
| SJHQ | SJLGG015 | chr2  | 84427901  | 7  | 41  | 0 | 29  | G | A | GCTTCATTGCTGTTTTGCA[G/A]ACTCTTGGCATCTGTAATA    |
| SJHQ | SJLGG015 | chr5  | 106710905 | 8  | 48  | 0 | 41  | C | T | GTGCAGCACTGCTCATTGTC[C/T]CATCTCTGGTCCAGTCAGCT  |
| SJHQ | SJLGG015 | chr6  | 101914008 | 11 | 66  | 0 | 41  | C | T | TGTCATTGCCAGTGTGG[G/C]JAACGTCAAAGTGTCTTCTTC    |
| SJHQ | SJLGG015 | chr6  | 139681291 | 9  | 74  | 0 | 55  | C | T | TTCTTTTTGGCTTTGTCATA[C/T]GGACCAGTGCATTTATTATG  |
| SJHQ | SJLGG015 | chr6  | 27404788  | 11 | 51  | 0 | 38  | C | T | TAGAGACAGGACTATATAA[C/T]ATTCTGTGTTAACCTCAGG    |
| SJHQ | SJLGG015 | chr8  | 122809823 | 8  | 51  | 0 | 44  | C | T | TTGTAGATAAAAAGATAA[A/C]TJGGTCTCTTTTTTACATTTT   |
| SJHQ | SJLGG015 | chr9  | 137541345 | 14 | 69  | 0 | 41  | G | A | ATTTTCTGTTTCCAGACC[G/A]GTTCCTGTGGAAGAAATTAG    |
| SJHQ | SJLGG015 | chrX  | 24965000  | 13 | 59  | 0 | 37  | C | G | TTTCTATTATGTCCTTCAA[G/G]TGTGTCATAAAAAATTTCT    |
| SJHQ | SJLGG015 | chrX  | 38222800  | 12 | 54  | 0 | 30  | T | C | GACTGTAGTCAGTGTCTAC[T/C]CCTTAACATTATCAGTACTT   |
| SJHQ | SJLGG016 | chr6  | 156679995 | 6  | 40  | 0 | 36  | C | T | TTTCTGTATGATGTTTACA[C/T]GAATGCCTAGGAGACTCAAT   |
| SJHQ | SJLGG018 | chr10 | 59804549  | 12 | 51  | 0 | 42  | C | A | GCAGGAGAACCTAAAATAAG[C/A]AACAGGCTGGGAGCAGCAG   |
| SJHQ | SJLGG018 | chr10 | 9780514   | 8  | 46  | 0 | 33  | A | T | TATTTTTTTTTAACTTTCA[A/T]CCTCAACACTCACAGCATG    |
| SJHQ | SJLGG018 | chr12 | 126827659 | 6  | 41  | 0 | 33  | G | T | GAGGACTGGTCTCAAAGCT[G/T]GGGGGTGCAGATAGGGAGGC   |
| SJHQ | SJLGG018 | chr1  | 29610658  | 13 | 37  | 0 | 26  | C | T | CATGTGCCCTACCCTCAAGG[C/T]GCCCTTCCAGGGGTGACAG   |
| SJHQ | SJLGG018 | chr14 | 60062155  | 20 | 50  | 0 | 45  | C | T | TCTCCACTGCTACTCCTTT[C/T]ATTCACCTTCTACTCTTCGT   |
| SJHQ | SJLGG018 | chr14 | 98672325  | 14 | 36  | 0 | 39  | T | C | CAGTATGCTTCAATTTC[A/T]CJGGTGGAAATAGCAGTCCCCA   |
| SJHQ | SJLGG018 | chr16 | 67640237  | 20 | 53  | 0 | 27  | G | A | TGCTCACGTTTCAGGGTTC[C/A]TTCAAATCCACATTATGA     |
| SJHQ | SJLGG018 | chr18 | 38483003  | 19 | 51  | 0 | 45  | C | T | CAGATTGGGAAGTGAACCTGG[C/T]GAGTCCAGAGATGATTTGA  |
| SJHQ | SJLGG018 | chr18 | 69811619  | 6  | 58  | 0 | 41  | G | C | TAATCCTAGTGGCTGATTA[G/C]ATTCAGAATGGTTAATCA     |
| SJHQ | SJLGG018 | chr20 | 1531356   | 19 | 52  | 0 | 33  | C | T | CTAATATAGAACATACTGG[C/T]GGGGCCAGCAACCCAC       |
| SJHQ | SJLGG018 | chr2  | 19673007  | 21 | 48  | 0 | 34  | C | A | AAAAACACAGCTGAGAGTT[C/A]AATATGAAGAAGGGTCTGA    |
| SJHQ | SJLGG018 | chr2  | 51747098  | 16 | 48  | 0 | 31  | A | T | TGTTAGCTAGGAGCCAGCTG[A/T]TTGAGACTGGGCTGACCGT   |
| SJHQ | SJLGG018 | chr3  | 119557315 | 25 | 58  | 0 | 32  | C | G | ATCCATACCCTAATTTAG[C/A]ACAACAGTTTACAGTTTTGT    |
| SJHQ | SJLGG018 | chr6  | 141310663 | 19 | 44  | 0 | 33  | T | A | TTATTTTTCATGAATCTTAT[T/A]AATGTCCCTCCGGCCAGTT   |
| SJHQ | SJLGG018 | chr6  | 15367529  | 16 | 43  | 0 | 37  | C | G | TCATCTTTGTTCTTCC[C/C]JAATCAAGATGGCCTGAAT       |
| SJHQ | SJLGG018 | chr6  | 99507186  | 4  | 38  | 0 | 45  | G | A | AGGTATAAGCTGTGACCTCC[G/A]TCTTCCACTTGTCTATTAT   |
| SJHQ | SJLGG018 | chr7  | 108872354 | 23 | 52  | 0 | 56  | T | C | TGCTATATCCATGCAATAT[T/C]TTGATTTATTTCTATTTCTG   |
| SJHQ | SJLGG018 | chr7  | 53319771  | 14 | 56  | 0 | 34  | G | A | GAAAGAAAATATATGAAACC[G/A]CAATAACATAGTCACTCCTC  |
| SJHQ | SJLGG018 | chr8  | 139508060 | 14 | 38  | 0 | 31  | G | A | CACATCACTTAACATCAAGA[G/A]CATCATAACCTGATGGAAAA  |
| SJHQ | SJLGG018 | chr8  | 2209240   | 9  | 65  | 0 | 48  | G | A | AGTCCAGGTGTGCTGTGAT[G/A]JAGAGCCCTCCATGTGGCCTT  |
| SJHQ | SJLGG018 | chr8  | 23682062  | 20 | 48  | 0 | 33  | C | T | TTCAATTCACCTCAATTT[C/T]GGGAAATTTAGAAATATGT     |
| SJHQ | SJLGG018 | chr8  | 7332273   | 21 | 29  | 0 | 17  | G | C | TTACCGTGTGGCCAGGGT[G/C]CCAAGGACATCTAGACTCC     |
| SJHQ | SJLGG019 | chr12 | 61839289  | 6  | 44  | 0 | 31  | G | A | AATTAGCCACTTTAGATTT[C/G]JGAGAGAAATCAACCTCAT    |
| SJHQ | SJLGG019 | chr15 | 58987316  | 6  | 44  | 0 | 35  | T | C | CTATTTTCTTTTCTTCA[T/C]TTCACGTGAGCTTGGCACC      |
| SJHQ | SJLGG019 | chr4  | 80597658  | 8  | 61  | 0 | 37  | A | C | TCTGAATTACATTTGAAA[C/A]GATCTACCACCATCTCAATG    |
| SJHQ | SJLGG019 | chr5  | 6973864   | 8  | 38  | 0 | 38  | C | T | TCCCCGTATTTTTGGCT[C/T]TGCCAGGCTGCTGCTTCTT      |
| SJHQ | SJLGG019 | chr5  | 86403894  | 8  | 49  | 0 | 32  | G | C | AGTCAGGAATCAAAAAGCA[G/C]GAAATATATTTTTCCCTTA    |
| SJHQ | SJLGG019 | chr6  | 166446625 | 5  | 33  | 0 | 38  | C | T | GGAACTCTCCCCGAACCA[C/T]GTAAGTACCTATTGGCTCAG    |
| SJHQ | SJLGG019 | chr7  | 308033    | 5  | 41  | 0 | 43  | G | C | AGCGTGTGTGAGTCTTAA[C/G]JAGGATGCAAGTGCCACTCC    |
| SJHQ | SJLGG019 | chr9  | 138300070 | 7  | 37  | 0 | 33  | A | G | CCCCACTCATTGCAAAAA[A/G]JCCCACTGAAAGCAAAAGGA    |
| SJHQ | SJLGG020 | chr10 | 50685246  | 20 | 50  | 0 | 27  | C | A | AATAAAAACAAATGAAATGAAAT[C/A]AACCTGAACTAACCGAGT |
| SJHQ | SJLGG020 | chr11 | 122887754 | 6  | 32  | 0 | 31  | C | T | AACAGAAAGCGAGTACGGAG[C/T]GAGTCTAGTGCATGTGAA    |
| SJHQ | SJLGG020 | chr11 | 61610580  | 21 | 42  | 0 | 43  | T | C | ATTCTGAGGTTAAAACCTTT[C/C]GJTAGTTCAGCAGTACTT    |
| SJHQ | SJLGG020 | chr1  | 176297585 | 10 | 32  | 0 | 19  | C | T | TACCCATGATTTTGGAGTT[C/T]TTAGCCCTCAAAGCATTGAT   |
| SJHQ | SJLGG020 | chr11 | 83558802  | 15 | 41  | 0 | 36  | C | T | CGTTCCATTTCTAAAAC[C/T]JAATCCACTGATGATTTAA      |
| SJHQ | SJLGG020 | chr12 | 104374495 | 11 | 33  | 0 | 23  | C | T | AATAAGAAAAATCTTTTCC[C/T]ATATATAAATCACTTTGTTT   |
| SJHQ | SJLGG020 | chr12 | 108228831 | 12 | 31  | 0 | 31  | G | T | AGATCATAGGTTGGGTGAAA[G/T]TATATAATTAATAGCTCTGT  |
| SJHQ | SJLGG020 | chr12 | 14628961  | 17 | 48  | 0 | 39  | C | T | CCATTTTTTTGCTTAATA[C/T]JGGTACAGATTTACAAAAGA    |
| SJHQ | SJLGG020 | chr1  | 223097389 | 20 | 46  | 0 | 34  | A | G | TTCTGTTGAAAAATTGTAG[A/G]TTTLAGAGGTAGAATTTTCA   |
| SJHQ | SJLGG020 | chr1  | 238094915 | 19 | 49  | 0 | 38  | A | G | CTGATCTTATCTTGTCTT[A/G]GAAAGTGAAGAGTGGTTAG     |
| SJHQ | SJLGG020 | chr12 | 52464860  | 16 | 44  | 0 | 27  | A | G | CTCTGCCCTATAAGCAGAT[A/G]TAGGAATGTTTGCCTAGTG    |
| SJHQ | SJLGG020 | chr12 | 83568896  | 6  | 41  | 0 | 32  | C | A | AAAAACAAAGTCGGGAAACA[C/A]AAGTGAACCCCTCAGTAGA   |
| SJHQ | SJLGG020 | chr12 | 83568897  | 6  | 43  | 0 | 32  | A | G | AAAAACAAAGTCGGGAAACA[C/A]AAGTGAACCCCTCAGTAGAG  |
| SJHQ | SJLGG020 | chr12 | 83568898  | 6  | 44  | 0 | 32  | A | C | AAAAACAAAGTCGGGAAACA[C/A]AAGTGAACCCCTCAGTAGAGG |
| SJHQ | SJLGG020 | chr13 | 100125989 | 18 | 47  | 0 | 28  | C | T | ATAAAACAATTTAAAAATTT[C/T]GCCAGTGAACCTTTGTTTA   |
| SJHQ | SJLGG020 | chr13 | 39962050  | 13 | 34  | 0 | 42  | G | C | CAGTGTGCTGCTGACTAAC[G/C]JACAAGGATGGGCTCTTGGGA  |
| SJHQ | SJLGG020 | chr1  | 66984221  | 11 | 36  | 0 | 34  | T | A | AAATTCATTTATTTGAAGA[T/A]GCAATTCACATAAATTTTG    |
| SJHQ | SJLGG020 | chr16 | 83376554  | 19 | 36  | 0 | 33  | C | A | TACATAAAATGCTCAGAG[C/A]TTTTTTTGAATGATTTCTC     |
| SJHQ | SJLGG020 | chr17 | 12798583  | 14 | 55  | 0 | 29  | G | A | GAAGTTTTTTTGTCTTTAC[G/A]JACAGTACTTTGCATGATGAA  |
| SJHQ | SJLGG020 | chr17 | 31786730  | 15 | 40  | 0 | 33  | G | A | GCAGGGGAGATGTTGGCAG[G/A]GCTGGCCGTGCTGTGGGGA    |
| SJHQ | SJLGG020 | chr18 | 31559903  | 4  | 36  | 0 | 41  | A | G | AGCAATTTAATGAATTAACA[A/G]GTATTTAAATGCCACAAAAT  |
| SJHQ | SJLGG020 | chr20 | 26148520  | 17 | 155 | 0 | 116 | G | T | CACATGAGGAGGGCCGGCTG[G/T]GTCTTTCTCCACTTTTGGG   |
| SJHQ | SJLGG020 | chr20 | 36034539  | 9  | 26  | 0 | 26  | G | A | CTGGGTGGCATCTGGAGAT[C/G]JAGAGGGGGCCGGGTGTGTGT  |
| SJHQ | SJLGG020 | chr2  | 172542066 | 11 | 36  | 0 | 42  | A | G | GCACCCTCTAAAATCTACC[A/G]GTGGATTACATCATCTGTA    |
| SJHQ | SJLGG020 | chr2  | 216002259 | 9  | 53  | 0 | 46  | A | G | AAGACGTTGCAATGAGCAAG[G/A]GGAAGATAGATTGTAGTAGTA |
| SJHQ | SJLGG020 | chr3  | 172824982 | 16 | 46  | 0 | 21  | G | A | CCCAATGTCACCTTACAGT[G/A]JACATTGTAGTACTTAATAA   |
| SJHQ | SJLGG020 | chr3  | 2897554   | 10 | 50  | 0 | 34  | G | A | AGTCAGAAATAAATGAAAG[G/A]GAAGGATTTTTAACGAAAGG   |

|      |          |       |           |    |    |   |    |   |   |                                                |
|------|----------|-------|-----------|----|----|---|----|---|---|------------------------------------------------|
| SJHQ | SJLGG020 | chr4  | 117995244 | 11 | 34 | 0 | 29 | A | G | TAGAAATGAAAATATTCTGC[A/G]AATGAAAACATGCATTTCG   |
| SJHQ | SJLGG020 | chr5  | 102715332 | 11 | 40 | 0 | 23 | A | G | TTATCCACATCATAAGCC[A/G]TCAAGTGGGTTTAACTCA      |
| SJHQ | SJLGG020 | chr5  | 25320099  | 4  | 40 | 0 | 43 | C | T | AGAGTCTGGGTAATTTAAC[C/T]AGTAAGTAAAACTAAAGT     |
| SJHQ | SJLGG020 | chr5  | 51117843  | 17 | 46 | 0 | 14 | T | G | GAATATGACCCCTCATTTT[G/A]ATGACCTCTATGGTAGCC     |
| SJHQ | SJLGG020 | chr6  | 143460327 | 13 | 49 | 0 | 28 | A | G | AAGTGGTGGCCTTTTTGTTT[A/G]JTATTTGTTTGTAGACATC   |
| SJHQ | SJLGG020 | chr6  | 54713637  | 8  | 50 | 0 | 48 | G | T | CTGGTTGGAGGAGACCTTT[G/T]AAAGAGGCCACTTAGCTTA    |
| SJHQ | SJLGG020 | chr7  | 138537907 | 18 | 65 | 0 | 40 | G | A | TGGCAGAGTCTGTCCAGCG[G/A]CAGTCAGTTGGAACCAATGG   |
| SJHQ | SJLGG020 | chr7  | 144250413 | 8  | 49 | 0 | 45 | G | A | TATTTATCCAGAAAGTAAAG[C/G]ATTAAGCAGCAGAAACAGG   |
| SJHQ | SJLGG020 | chr8  | 33816685  | 19 | 49 | 0 | 32 | A | G | AATGTAATAACCTTAAGAT[A/G]TAGAGCTACATTAACTT      |
| SJHQ | SJLGG020 | chr9  | 30235598  | 11 | 29 | 0 | 30 | T | C | CAACAATTATCTAAATTC[T/C]ATTATTTAAATTTTGGATTT    |
| SJHQ | SJLGG021 | chr12 | 17021392  | 10 | 43 | 0 | 43 | C | T | ACATGGAACAATGGGGTCTT[C/T]GAGCTACCCGGGAAGGGCCC  |
| SJHQ | SJLGG021 | chr18 | 68668277  | 13 | 50 | 0 | 43 | A | C | TTAAATCTAATTAGAAATCAT[A/C]AAGTTTCAGTTCCTATAAAT |
| SJHQ | SJLGG021 | chr20 | 991774    | 16 | 49 | 0 | 42 | C | T | AATTGCCCATCTTCCCAGG[C/T]TTTGGTCCATCTACCTGAAA   |
| SJHQ | SJLGG021 | chr21 | 25315813  | 10 | 27 | 0 | 36 | G | A | TTGCCTTTTATTGTATGTG[C/G]ATGATGTTCTCTATAGGTA    |
| SJHQ | SJLGG021 | chr21 | 25943517  | 6  | 29 | 0 | 44 | A | T | GAATGTTCCCAACTAAAT[C/A]TJTGTTTTAAATTTAAATAG    |
| SJHQ | SJLGG021 | chr2  | 194296326 | 3  | 10 | 0 | 28 | A | G | TTAATCCAATTTAATAATA[A/G]TACACATTGATACTTAATA    |
| SJHQ | SJLGG021 | chr3  | 156740618 | 16 | 59 | 0 | 43 | A | G | GAATAATCTGTAATTCGT[G/A]ATGTTGTGTAATAATCATCA    |
| SJHQ | SJLGG021 | chr3  | 95151164  | 14 | 58 | 0 | 40 | G | A | TGACAAGAATTCATCCTAA[G/A]CTGCTGATGTTAAGAAGCTG   |
| SJHQ | SJLGG021 | chr4  | 30758328  | 14 | 58 | 0 | 44 | T | G | TTCACTACTCTCTCTCC[T/G]GTCTTTTGTTCAGTCTCTCT     |
| SJHQ | SJLGG021 | chr5  | 43348234  | 7  | 41 | 0 | 46 | T | C | ATGTCTAATATGTCTATGG[T/C]TGACCTTTTGAATTTCCG     |
| SJHQ | SJLGG021 | chr5  | 88720939  | 5  | 33 | 0 | 37 | A | G | TCCTGTACTTCAATAAGAG[A/G]GAAACACAGAACCAGTAAA    |
| SJHQ | SJLGG021 | chr7  | 63377816  | 18 | 50 | 0 | 47 | T | A | TAAAAGTTTGGGAGAATTA[T/A]TATTAATGACTTGAGTTTTT   |
| SJHQ | SJLGG021 | chr9  | 76223447  | 8  | 43 | 0 | 33 | G | T | GGCATGTAATCAATGAACT[A/G]TCTAAATTTTAACTTACC     |
| SJHQ | SJLGG022 | chr18 | 73770707  | 9  | 43 | 0 | 26 | C | T | GGACCTGCTGGCCTAGTAG[C/T]GGGAGGAAACAGCGCCGAG    |
| SJHQ | SJLGG024 | chr11 | 24752878  | 21 | 69 | 0 | 42 | A | G | GTTCCCTACCAGTCAAACT[A/G]TCTTTTGAACAAATATT      |
| SJHQ | SJLGG024 | chr11 | 57653135  | 17 | 42 | 0 | 28 | C | T | CCCTCTCACTCAAACTCCCA[C/T]GTCCCAACCCATCTCCCTT   |
| SJHQ | SJLGG024 | chr12 | 84022210  | 14 | 59 | 0 | 56 | A | G | CCTATTTTTGAGTATGGCC[A/G]TCTGTTGAACTTATCTAAT    |
| SJHQ | SJLGG024 | chr13 | 103480217 | 8  | 47 | 0 | 35 | G | A | GTAAGCAGACGTCTCTCC[G/A]TCTCTCCCATTTGGAAGA      |
| SJHQ | SJLGG024 | chr13 | 27516447  | 14 | 51 | 0 | 32 | C | T | GCCACACTAGTATGCCAGG[C/T]GCAGCAAATCAGTGTGAGGC   |
| SJHQ | SJLGG024 | chr13 | 39054358  | 12 | 58 | 0 | 46 | A | G | TATTTCTAAAACCTATTT[A/G]AATCTCAATGGATGGAC       |
| SJHQ | SJLGG024 | chr14 | 22753364  | 9  | 37 | 0 | 29 | C | A | GATATTGATTTTTGAAAT[A/C]AAGCTTATTTACCAATAAC     |
| SJHQ | SJLGG024 | chr14 | 37613501  | 17 | 71 | 0 | 39 | A | G | TATTAATCTCAATTAAT[A/G]ATGATTGATCAAAATTTGTTT    |
| SJHQ | SJLGG024 | chr14 | 85799847  | 14 | 49 | 0 | 38 | C | A | GTCACCCAAATGGAGCCAG[C/A]TGGAGGAGTGGTTCTGTGA    |
| SJHQ | SJLGG024 | chr18 | 34274370  | 6  | 51 | 0 | 36 | C | G | CTCATTCTGCTGGAGCCGG[C/G]GGCTCCTCCACAGCTCCCG    |
| SJHQ | SJLGG024 | chr1  | 84212584  | 15 | 54 | 0 | 31 | A | G | CTTCCACATACTCTGAAA[A/G]TCCAAATGGATGCTATTTC     |
| SJHQ | SJLGG024 | chr1  | 96141586  | 24 | 68 | 0 | 37 | G | A | TAATGCAGGATAATTTATA[A/G]TAAATGCTTATTTTACA      |
| SJHQ | SJLGG024 | chr2  | 113561019 | 11 | 48 | 0 | 24 | G | A | ATGGAATGTAACCTATTC[G/A]GTAGGGGAACAGAATTCACA    |
| SJHQ | SJLGG024 | chr2  | 143852700 | 21 | 49 | 0 | 38 | G | A | AGTGGCAGATTTTTTGGGG[G/A]GATGAAGTAGGAGTAATACT   |
| SJHQ | SJLGG024 | chr2  | 21351012  | 19 | 48 | 0 | 40 | G | A | TATGAATTTCACTCCAC[G/A]TATTTTGTGTTCTGGATAT      |
| SJHQ | SJLGG024 | chr3  | 168316789 | 6  | 40 | 0 | 37 | G | T | TTCTCTCTCTCTCCGGT[G/T]GTCTCTGGAAATTTCTCT       |
| SJHQ | SJLGG024 | chr3  | 35155443  | 18 | 64 | 0 | 40 | G | C | CTGACAATCTTAGAGTCT[G/C]TATAATGCTGAACCTTTGTCA   |
| SJHQ | SJLGG024 | chr4  | 102669563 | 15 | 56 | 0 | 44 | T | C | AAGGAAGCTTCTTTCATTT[C/T]AACAGCAAAGTGTGCTGTGA   |
| SJHQ | SJLGG024 | chr4  | 136978499 | 22 | 57 | 0 | 35 | C | T | TACATATCTTAAAGCCATA[C/T]GTTTGTGAATTCATTAATTT   |
| SJHQ | SJLGG024 | chr4  | 143925506 | 10 | 65 | 0 | 40 | G | A | TGATCAAAGATGTAACCTT[C/G]AJAGATCTTCCACTTATCTC   |
| SJHQ | SJLGG024 | chr4  | 41739186  | 13 | 53 | 0 | 36 | A | T | TTAACAGCACCCGGGCTTCC[A/T]GTGACAAGGTAGGAAAACCT  |
| SJHQ | SJLGG024 | chr7  | 21606930  | 12 | 65 | 0 | 46 | C | A | AATTGATTTCTCTTGTCA[C/A]CTACATGTTCTTGGCTTCA     |
| SJHQ | SJLGG024 | chr8  | 42585174  | 9  | 47 | 0 | 47 | T | A | TTGGGAGCTCCAAAAATAAA[T/A]TCAGATTTAAACTTAAAGA   |
| SJHQ | SJLGG024 | chr9  | 1168921   | 11 | 52 | 0 | 50 | C | T | TCTGAAGGCAACACAAATGA[C/T]GAAATTTGTTTCAAAAAA    |
| SJHQ | SJLGG024 | chrX  | 63809466  | 15 | 43 | 0 | 40 | C | A | GCTCCTTGAATTCATCCCTT[C/A]AACACTTTGAACCTCATATAG |
| SJHQ | SJLGG024 | chrX  | 82243983  | 10 | 51 | 0 | 50 | G | A | CTATTCAGGCAGTTATCTAT[G/A]GCCATCTTTCATCAGTTTTT  |
| SJHQ | SJLGG024 | chrX  | 82243984  | 10 | 51 | 0 | 47 | G | T | TATTCAGGCAGTTATCTAT[G/A]TCCATCTTTCATCAGTTTTTC  |
| SJHQ | SJLGG025 | chr10 | 36098730  | 10 | 66 | 0 | 49 | C | T | GTGACTCAGCTGTGTGCCAA[C/T]GTAACATTTTTCAATTTGTC  |
| SJHQ | SJLGG025 | chr10 | 55752449  | 16 | 64 | 0 | 34 | C | T | TGTCAAATTTGGGAATGAAA[A/G]TGTCTGGTGAAGAAGATA    |
| SJHQ | SJLGG025 | chr12 | 95073731  | 6  | 58 | 0 | 43 | C | T | ACTTTGTCAGTCAATGTTT[C/T]TTCAGACTCGGTTTTTCAGTC  |
| SJHQ | SJLGG025 | chr13 | 71238075  | 8  | 18 | 0 | 23 | A | T | CTGGTATTCTGCAGATGAC[A/T]TTTTTTTTTTTTCTGACTG    |
| SJHQ | SJLGG025 | chr13 | 72488366  | 13 | 54 | 0 | 31 | T | A | GGAAAGGCAATGCCCCAA[T/A]TCTTTATGTCAGTAATATT     |
| SJHQ | SJLGG025 | chr13 | 82247076  | 8  | 63 | 0 | 37 | T | G | GGGATTACATTTGTGTGT[G/T]TTTTTCCCCCACAAGCACTG    |
| SJHQ | SJLGG025 | chr17 | 72047747  | 13 | 39 | 0 | 33 | C | T | GGGGAAGCCCTAGGGCCCG[C/T]GAGAGCAAAGGGCTGTGGG    |
| SJHQ | SJLGG025 | chr18 | 45216008  | 10 | 45 | 0 | 38 | G | A | AACTCCAGGAAATCAGAG[G/A]GCTGTGCCTAGGCTCCAGGG    |
| SJHQ | SJLGG025 | chr2  | 126523313 | 12 | 74 | 0 | 48 | G | T | CTTTTTAAATCTGTATTTT[G/T]TACATAACGCACCTTACAG    |
| SJHQ | SJLGG025 | chr2  | 201060386 | 7  | 58 | 0 | 33 | G | A | CGAGGTAACCTGGAACACTAC[G/A]TGTCTTCACTCAACTCCAA  |
| SJHQ | SJLGG025 | chr3  | 11202242  | 7  | 68 | 0 | 40 | G | T | CTTCTCACATACTTAAACAA[G/T]GTCTCATCTGTTCCCTT     |
| SJHQ | SJLGG025 | chr4  | 84887809  | 13 | 63 | 0 | 41 | C | A | AAGATTGACAGGTAATGT[C/A]AGCTAAATGGTTTATGGCT     |
| SJHQ | SJLGG025 | chr5  | 105823804 | 14 | 78 | 0 | 33 | A | G | TTTTTCTACTAGGTTAAACA[A/G]TAAACCTGAAATAAATAG    |
| SJHQ | SJLGG025 | chr6  | 110833165 | 11 | 53 | 0 | 32 | C | T | ACAATGAAAATCACCTT[C/T]AATCTTACTCTACATCT        |
| SJHQ | SJLGG025 | chr7  | 138586845 | 12 | 83 | 0 | 43 | G | T | TCTAATTTTTATTCTTTGTT[G/T]ATACTTATCGTTAATGAT    |
| SJHQ | SJLGG025 | chr7  | 140431408 | 17 | 77 | 0 | 41 | A | G | TAGCCAATGTTTATAGAGAG[G/A]GCAATTTAACTATTGGTTTA  |
| SJHQ | SJLGG025 | chr8  | 146072650 | 15 | 60 | 0 | 38 | C | T | GTTCACTGCACTGCAATTT[C/T]GGGCTTCGGTAAGCTCATCT   |
| SJHQ | SJLGG025 | chr9  | 121402792 | 12 | 51 | 0 | 25 | C | T | ACCCCAATTTTAAAGGTC[C/T]TCTGAGGGCCGAGTTGGTG     |
| SJHQ | SJLGG025 | chrX  | 123988576 | 17 | 76 | 0 | 57 | C | A | TGGGAAAGAAATTTCAAAT[C/A]TAAAGACATAAAGCTCAAAGTA |
| SJHQ | SJLGG025 | chrX  | 135710743 | 9  | 36 | 0 | 34 | G | A | ATGTGCATGGGTACAAGAT[G/A]GCGCCTCTCTCTGGGAA      |
| SJHQ | SJLGG025 | chrX  | 137935610 | 7  | 41 | 0 | 30 | C | A | TTACAAATATACCCCTTAC[C/A]ATTTAGCATGTAATTTGCT    |
| SJHQ | SJLGG025 | chrX  | 56580176  | 7  | 61 | 0 | 37 | G | A | TTCCCATTCCTCTTTTCT[C/G]AATCTTAAAGCTATCCTAA     |
| SJHQ | SJLGG026 | chr17 | 58335561  | 9  | 59 | 0 | 38 | A | T | ACATGAAATGATGAAATGA[A/T]AAACATGAAATGATGCAAT    |

|      |          |       |           |    |    |   |    |   |   |                                                     |
|------|----------|-------|-----------|----|----|---|----|---|---|-----------------------------------------------------|
| SJHQ | SJLGG026 | chr21 | 25983643  | 8  | 63 | 0 | 45 | T | A | TGCTCTAAGAAAGCCATAC[T/A]TTTTTTGTAATATATCTATA        |
| SJHQ | SJLGG026 | chr22 | 32960947  | 6  | 30 | 0 | 22 | C | T | CAAACAGTGCCTCGGACTG[C/T]ACCCAAACAGTGCTCCTGGA        |
| SJHQ | SJLGG026 | chr4  | 141519691 | 7  | 43 | 0 | 31 | C | T | TTGGGGTGTCTTGGTACCTC[C/T]GCCATGAGCAAGGCCGAGGG       |
| SJHQ | SJLGG026 | chr7  | 97576962  | 6  | 60 | 0 | 46 | G | A | GGATGAAGAAAGACATCTGC[G/A]TCAGACAGCCCCGATGAGAG       |
| SJHQ | SJLGG026 | chr8  | 142345872 | 8  | 35 | 0 | 24 | C | T | GTGTTGAGGCCAGGGCTCAA[G/T]GTGTATCAGGAGTGACCAGG       |
| SJHQ | SJLGG027 | chr10 | 51741656  | 12 | 21 | 0 | 27 | G | A | AGTTCAGACTCAAACTTGT[G/A]AAAAACAGGTGTAGAAAGG         |
| SJHQ | SJLGG027 | chr10 | 71429045  | 6  | 30 | 0 | 33 | C | G | CAGCTGCATATCCGAGTCT[C/G]CCCCAGCCTGCCTGGTTTGC        |
| SJHQ | SJLGG027 | chr10 | 86711648  | 6  | 48 | 0 | 48 | G | A | TTTTCCCCATGCTCATCT[G/A]TCTTCAAGCGTGTATTATCAT        |
| SJHQ | SJLGG027 | chr11 | 131567082 | 18 | 63 | 0 | 38 | C | T | GGATGTGAATAATAAGCA[C/T]AGAGATTACAGTCATTACAA         |
| SJHQ | SJLGG027 | chr11 | 34387583  | 16 | 53 | 0 | 32 | A | C | ATTATCTGCTTAAAAAAA[A/C]CAAAATCAACAATTGTGCTC         |
| SJHQ | SJLGG027 | chr13 | 113677476 | 14 | 46 | 0 | 41 | T | G | GACGCCCTCGGCTCAGCCC[T/G]CTAAGAGACTCGGCAGCCAG        |
| SJHQ | SJLGG027 | chr13 | 88405034  | 15 | 73 | 0 | 37 | A | C | TTCACTGTGGTCACTCAAT[C/A]TCTGTGTGAGTTATTGTGT         |
| SJHQ | SJLGG027 | chr1  | 51935497  | 9  | 39 | 0 | 41 | G | A | GATTAGCTAGAAAACTACC[G/A]CCTATGTACAGATAATCTC         |
| SJHQ | SJLGG027 | chr16 | 28053346  | 16 | 52 | 0 | 34 | G | A | GGAATTTGGTTTTTACATT[C/G/A]CCATTCTGTATGAAAGGA        |
| SJHQ | SJLGG027 | chr19 | 13383614  | 11 | 36 | 0 | 32 | G | A | AGAGAGGGGTGGAGAAACC[G/A]TAGGTTATTTCCATAGGAGA        |
| SJHQ | SJLGG027 | chr1  | 96907286  | 6  | 42 | 0 | 46 | T | C | CATATTGTTCACTCCGAA[T/C]TTTATCACTTGCCTAATTTTT        |
| SJHQ | SJLGG027 | chr2  | 118609367 | 17 | 63 | 0 | 24 | G | T | CTAAGGCAAGGCCCTAGAAG[G/T]ATCCTTTGTTTCTGATGGGA       |
| SJHQ | SJLGG027 | chr21 | 26075588  | 12 | 50 | 0 | 34 | T | C | TAAAGGACAAGTGAAGACC[T/C]CTAAGAACAGTATTTATAG         |
| SJHQ | SJLGG027 | chr2  | 226415712 | 17 | 61 | 0 | 41 | T | C | ATAGAAGACTCAGGCTATT[T/C]CCATTATAGATGACTACA          |
| SJHQ | SJLGG027 | chr22 | 49407724  | 4  | 14 | 0 | 16 | C | T | ACCCAGGAGGCCCTCTCC[C/T]ATCCCTCCATCTCCCGCA           |
| SJHQ | SJLGG027 | chr2  | 67408064  | 11 | 45 | 0 | 39 | T | A | GTCAATGAGTCGATGA[T/A]TGTGAAACCTTAATATACA            |
| SJHQ | SJLGG027 | chr3  | 85883438  | 19 | 56 | 0 | 36 | C | T | CCCTAAGAATTATAAT[C/T]GAAAATGCAAGCCAAACACA           |
| SJHQ | SJLGG027 | chr3  | 93585178  | 7  | 49 | 0 | 41 | C | T | GGAAGACTTAGGATTTGATG[C/T]CATGCTTCAAGTCCATG          |
| SJHQ | SJLGG027 | chr3  | 95359906  | 16 | 59 | 0 | 45 | A | T | TGGGACAGGATTTACAAA[A/T]GTAGTTAATATTTCCAAATTC        |
| SJHQ | SJLGG027 | chr4  | 131419325 | 11 | 42 | 0 | 42 | C | T | ACTTTCAGATGGGACAGGTT[C/T]GGTAGATCAAGAGACTGCAG       |
| SJHQ | SJLGG027 | chr4  | 28400424  | 12 | 48 | 0 | 42 | G | A | CATTTCATTAGCTCC[C/G/A]GAAGTTGGGCAGGCCCTAAA          |
| SJHQ | SJLGG027 | chr4  | 45926139  | 17 | 55 | 0 | 32 | C | T | CAATGGGTAACATGGAATA[C/T]TCTGAGGAAGTGGCACCTTT        |
| SJHQ | SJLGG027 | chr4  | 81695422  | 13 | 60 | 0 | 37 | A | T | CAGGCACATAAGTTACCCTG[A/T]AGTCACAAAACCTTTGCATA       |
| SJHQ | SJLGG027 | chr5  | 174910264 | 17 | 60 | 0 | 52 | A | G | AACAGTCCAGGTAGCCGAC[G/T]CATTGTGAGAATGTCTTTA         |
| SJHQ | SJLGG027 | chr5  | 21768135  | 13 | 50 | 0 | 51 | G | T | GATGAAATTCATTTAACCTT[G/T]ATTCAGCATGAGTATTATTA       |
| SJHQ | SJLGG027 | chr7  | 140335102 | 18 | 67 | 0 | 46 | T | A | ATAAATAAATAAGTAAATG[T/A]TTATGACAAATAACTTTTC         |
| SJHQ | SJLGG027 | chr7  | 70629664  | 14 | 45 | 0 | 33 | C | T | AGAACCAACACATTTTCAA[C/T]AGTGTGGTAACTCGGTGAGT        |
| SJHQ | SJLGG027 | chr8  | 38824279  | 12 | 48 | 0 | 22 | T | A | CACAACCTTTAAATTTTT[T/A]AAAAGTTTTATTACAAATAG         |
| SJHQ | SJLGG027 | chr9  | 98854825  | 15 | 65 | 0 | 46 | G | A | TAGCATATTATCATGCCAGC[G/A]TTTTTCTGACTCTGAGCTGA       |
| SJHQ | SJLGG027 | chrX  | 19222401  | 6  | 53 | 0 | 40 | A | G | TCTAAATCTCTCATTTTGC[A/G]TTTAAACCATTTTGGGCTCT        |
| SJHQ | SJLGG027 | chrX  | 41806980  | 18 | 61 | 0 | 44 | C | T | CAGAGGATGGTTATTTACTA[C/T]GTTTAAAGTAAAGATATAAA       |
| SJHQ | SJLGG028 | chr10 | 26416871  | 39 | 81 | 0 | 46 | C | A | TTCTTTAAATAATTAAGAT[C/A]TTTTTTAGTAAGATTTTCAA        |
| SJHQ | SJLGG028 | chr10 | 28218220  | 19 | 47 | 0 | 28 | C | T | ACAGATGAATAGATGAGAGA[C/T]GATTGATAGATAAAATATG        |
| SJHQ | SJLGG028 | chr10 | 37442189  | 8  | 76 | 0 | 45 | A | G | TTGATGAGGACTAGAACATA[A/G]GTAGATATTTTAAAGAGAG        |
| SJHQ | SJLGG028 | chr10 | 56343113  | 20 | 51 | 0 | 45 | T | A | ATTTACTTGTGACTATTCCTT[C/A]AAATCAAGGATGTTATTTCCCTCAT |
| SJHQ | SJLGG028 | chr10 | 75202644  | 13 | 39 | 0 | 39 | T | A | AATTGTTTACAGGAAAAAA[T/A]TTTTTTTTATTGAAAGCAAT        |
| SJHQ | SJLGG028 | chr1  | 146905271 | 13 | 47 | 0 | 46 | G | A | TGAGTTAAATGCATGTACAC[G/A]TGAATTTGATGGAAGAAAACA      |
| SJHQ | SJLGG028 | chr1  | 181312951 | 12 | 29 | 0 | 21 | T | G | TGGTGTGCCCTGTCTCCT[C/T]GCAAGATCGTCCCTATCACCC        |
| SJHQ | SJLGG028 | chr12 | 24068686  | 24 | 56 | 0 | 49 | T | C | TAGGAGATGCTGAATCTCCTT[C]JAAATCAAGGACAGTAGGAC        |
| SJHQ | SJLGG028 | chr13 | 90908627  | 16 | 47 | 0 | 37 | C | T | AATTTGTAGAAAATTTATTA[C/T]AAGAGGCAATTTGTGTAGAA       |
| SJHQ | SJLGG028 | chr15 | 53695739  | 4  | 29 | 0 | 38 | G | T | CAGAGCGTGAATGACACAG[G/T]TATCCGATGTACATGGCTG         |
| SJHQ | SJLGG028 | chr1  | 57483315  | 15 | 42 | 0 | 34 | G | A | TCTTGCTGATTAATCTCGCA[G/A]TGTAAACACTTCTGCGGAA        |
| SJHQ | SJLGG028 | chr16 | 35029534  | 11 | 26 | 0 | 24 | C | A | CAGACATCCGACACTTGCAC[A/C]ACTCCCATAGAACACACAG        |
| SJHQ | SJLGG028 | chr17 | 69019500  | 17 | 37 | 0 | 25 | C | T | GATTATAGCAAACCTTAATG[C/T]ACTCTCATCGGCTGACTACA       |
| SJHQ | SJLGG028 | chr17 | 76288370  | 16 | 38 | 0 | 25 | G | A | GGCTTCCCTGCGTGGGGG[C/G/A]ACACTGTTGCCAGTACAGA        |
| SJHQ | SJLGG028 | chr18 | 27205748  | 7  | 56 | 0 | 42 | G | T | ACAAATAAGATATATTTT[C/G]TTAATATCATCAATGACAA          |
| SJHQ | SJLGG028 | chr1  | 8286852   | 4  | 19 | 0 | 25 | G | A | GACACAGGGGGCCAGGG[G/A]AAGCCACAGCTCTGGAGAGC          |
| SJHQ | SJLGG028 | chr2  | 180166821 | 18 | 46 | 0 | 51 | A | T | AAAGCCTATAGTTGTAACAC[A/T]TATAGTAACTCTACTAAAGA       |
| SJHQ | SJLGG028 | chr2  | 41752780  | 15 | 48 | 0 | 58 | C | T | TGTTTCTTCCCTTGGATGA[C/T]GGTATGGCACCATGGTGTGG        |
| SJHQ | SJLGG028 | chr2  | 57484444  | 9  | 68 | 0 | 48 | C | T | TAATACTCCCTTGTGAA[A/C/T]GTTTAAATGATGTGAACAG         |
| SJHQ | SJLGG028 | chr3  | 187764998 | 22 | 60 | 1 | 38 | C | A | ATATTGCAAAAGGTAGAATA[C/A]CTACAGGCAGCTTTTTCTTT       |
| SJHQ | SJLGG028 | chr4  | 27056084  | 16 | 34 | 0 | 30 | C | T | GAAACTTACATATACATAA[C/T]TTGGCGGTCAACCCGGGGAT        |
| SJHQ | SJLGG028 | chr4  | 29208568  | 23 | 53 | 0 | 38 | G | C | CAGGGACATGCTATAATA[G/C]AATAGAATAAAAGGTATACA         |
| SJHQ | SJLGG028 | chr5  | 45229024  | 31 | 65 | 0 | 41 | T | C | CAGAAGAAGAAAAATATCAC[T/C]ATACCATTATGTCTTTTAC        |
| SJHQ | SJLGG028 | chr5  | 94038409  | 18 | 45 | 0 | 49 | C | G | CACCTTTGTAAAATTTTT[C/G]CAAGAGCTTATTAGTCTTTG         |
| SJHQ | SJLGG028 | chr6  | 71282290  | 30 | 61 | 0 | 50 | T | C | ACTATATTGAAAGTATTTTT[T/C]ACTGTTGAAATATGTTTTTT       |
| SJHQ | SJLGG028 | chr7  | 151966898 | 6  | 57 | 0 | 43 | A | G | AGCAAGGTTCTTATGGCAGG[A/G]GAAAAGTGAGAGGAAACAAA       |
| SJHQ | SJLGG028 | chr7  | 20584204  | 32 | 62 | 0 | 43 | G | A | TTAAGAAAACCTATAGCTTT[G/A]TGAAGAATCTATTCTTGAA        |
| SJHQ | SJLGG028 | chr8  | 107940901 | 15 | 60 | 0 | 45 | A | C | TCTCTAATTTGTATCTATAC[A/C]GTGTTAAAAGAGCATCAGTT       |
| SJHQ | SJLGG028 | chr8  | 79230743  | 11 | 56 | 0 | 46 | T | C | ACAAAAGGGGACCAAGTTA[T/C]JTTTCCACCTTGGAAAATATAT      |
| SJHQ | SJLGG028 | chrX  | 66267492  | 33 | 63 | 0 | 51 | A | T | GTCACTTTTCTGTAACCTCT[C/A]TJTAGACATTTTTATTGCATT      |
| SJHQ | SJLGG029 | chr10 | 82246324  | 6  | 43 | 0 | 35 | A | G | GGTTGGGTTAAATGAGGTCA[A/G]JAGGAGCACTCTGTAGGATCC      |
| SJHQ | SJLGG029 | chr10 | 83000048  | 8  | 55 | 0 | 44 | A | G | TTTGTCCATCCCAAGGTTGG[A/G]ACTTTGACTACATCTTTGTC       |
| SJHQ | SJLGG029 | chr10 | 86024192  | 9  | 71 | 0 | 39 | G | T | TTCCCTGTTAAAGGAAAAAG[G/T]GATCCCAAAATTTCTTATA        |
| SJHQ | SJLGG029 | chr1  | 106467199 | 11 | 75 | 0 | 53 | G | A | GCAATTAGTCTTACAGATC[G/A]ATTTTGAAGATACCTTATT         |
| SJHQ | SJLGG029 | chr12 | 119573220 | 11 | 70 | 0 | 46 | G | A | CAAAAACCTGTACAAATGT[C/G/A]AAACAAAAACAATAAAT         |
| SJHQ | SJLGG029 | chr12 | 15385394  | 9  | 60 | 0 | 38 | G | T | TCTGAGTCCACAACATAA[T/G/T]CAGCCATTCTTAGATTCTAT       |
| SJHQ | SJLGG029 | chr13 | 45861802  | 7  | 59 | 0 | 34 | C | T | GTCTACTTTCCAGAAATTC[C/T]TCTCCCAACCCATCTCACCC        |
| SJHQ | SJLGG029 | chr13 | 47072833  | 19 | 85 | 0 | 43 | A | G | TGTACAGATTTATCTAGCT[A/G]AATATAGTCTTACAGACTT         |

|      |          |       |           |    |    |   |    |   |   |                                                |
|------|----------|-------|-----------|----|----|---|----|---|---|------------------------------------------------|
| SJHQ | SJLGG029 | chr13 | 70099629  | 17 | 82 | 0 | 45 | T | C | AGAATTAGTACCCAAAATG[T/C]ATGGTAAGCACTAAGCTTG    |
| SJHQ | SJLGG029 | chr13 | 89195335  | 21 | 86 | 0 | 47 | G | T | TCTATTTGCATTGTCAATT[G/T]ATGTAGCAATATCTTAGG     |
| SJHQ | SJLGG029 | chr14 | 55031538  | 15 | 72 | 0 | 39 | A | G | GGAAAACAAAAGTGTAAAT[A/G]GTGGAATAATATCTCAGATA   |
| SJHQ | SJLGG029 | chr16 | 16731933  | 11 | 89 | 0 | 61 | T | C | AAAGCACAACATGAGACCTA[T/C]TCTAAGGTGATTAGAAAGCT  |
| SJHQ | SJLGG029 | chr16 | 60801248  | 9  | 82 | 0 | 49 | C | G | TTTTCTGAAGAATTTGTAT[C/G]TAATTTCTAAAAAATCAAG    |
| SJHQ | SJLGG029 | chr18 | 42866517  | 11 | 65 | 0 | 43 | G | A | ATAGAGGACTAAAGGTGGCT[G/A]CAATTAATTTTAGATCGAATA |
| SJHQ | SJLGG029 | chr1  | 97501684  | 13 | 63 | 0 | 63 | C | G | CCTACTAGTATTTCTTATG[C/G]ATTACATTTGTTTCATTGT    |
| SJHQ | SJLGG029 | chr20 | 38745043  | 15 | 80 | 0 | 50 | C | T | CTGGCAACAGGAGTCAGAG[C/T]ACATTATCTGTTATTAGCAC   |
| SJHQ | SJLGG029 | chr2  | 132914817 | 10 | 70 | 0 | 65 | T | C | TTATATTCATGAGATAG[A/T]C]CATTTTTATCTATGTATT     |
| SJHQ | SJLGG029 | chr2  | 153879633 | 9  | 70 | 0 | 42 | G | T | ATGCAAAAGTATTTGCTATT[G/T]TACTATCAAGTGATAAGTTA  |
| SJHQ | SJLGG029 | chr2  | 234237286 | 6  | 39 | 0 | 33 | G | A | ACCTACCATCGTACTACCC[G/A]CAGGGCAGCAGGCCCTAGGGG  |
| SJHQ | SJLGG029 | chr2  | 40803036  | 12 | 71 | 0 | 57 | C | A | TTCACTGTATAGTATATAT[C/A]TTTTTTTGTGTGAATAATTTT  |
| SJHQ | SJLGG029 | chr2  | 51743840  | 10 | 67 | 0 | 48 | G | T | GAATTTTTTATCATAGTT[G/T]GCTTCCCTGGGAAGCAAGTT    |
| SJHQ | SJLGG029 | chr2  | 53027645  | 14 | 72 | 0 | 60 | G | A | CAAAATGGTTGTGTTTGTAT[C/G]AAGACTCACAGCAGTTTTTC  |
| SJHQ | SJLGG029 | chr2  | 63823180  | 10 | 60 | 0 | 32 | A | G | TTGTCCTTACCATATGCTC[A/G]TAGTTTAAAAAACCAGAA     |
| SJHQ | SJLGG029 | chr3  | 139684287 | 8  | 38 | 0 | 38 | G | T | CCAGGGTAAATGTGGAGT[G/T]TATTCTCCACTCTGGGGCC     |
| SJHQ | SJLGG029 | chr4  | 181415748 | 18 | 90 | 0 | 43 | G | C | TTGTATGAAGAACATCAG[C/G]GTAAAAAGTTATAGCTAG      |
| SJHQ | SJLGG029 | chr4  | 32908994  | 21 | 83 | 0 | 42 | A | G | TAAATGTAGTGAAGAA[A/G]GAACTTTAATAAAGCAG         |
| SJHQ | SJLGG029 | chr4  | 71108852  | 7  | 60 | 0 | 65 | C | T | TGGATAATCTACCATTTC[A/C]TGAATTTTCTTCTTACC       |
| SJHQ | SJLGG029 | chr4  | 87275566  | 7  | 48 | 0 | 34 | G | A | TGATTTCACTTCTGTAGTC[G/A]AAATTTTGGAGCAGTATT     |
| SJHQ | SJLGG029 | chr5  | 103464375 | 10 | 74 | 0 | 41 | C | G | ATTGGCTTCTGGCAGCTC[G/G]GAGCACCCCTTGACATTTAAA   |
| SJHQ | SJLGG029 | chr5  | 25822558  | 23 | 87 | 0 | 51 | A | C | TCAACTTTTTTACTGAA[A/C]GTGGTCTGGTTAATCTTAC      |
| SJHQ | SJLGG029 | chr6  | 54138384  | 9  | 47 | 0 | 32 | A | G | CCCAATGTACTTCCAAATC[A/G]TACCACCTTCTGACACACAC   |
| SJHQ | SJLGG029 | chr7  | 123122128 | 9  | 63 | 0 | 52 | G | T | CAATATAAACATAAACT[G/T]GGGGGAGAACCTCAAACCT      |
| SJHQ | SJLGG029 | chr7  | 145545037 | 23 | 87 | 0 | 35 | G | A | TGAAGAAATAATGTGCTA[G/A]GTGCAAAAATAGAAAAAT      |
| SJHQ | SJLGG029 | chr7  | 55201652  | 6  | 47 | 0 | 33 | C | T | AGTAAGCAAAGTCTCAGCC[G/C]TAGAGATAGACAAGTAGAAT   |
| SJHQ | SJLGG029 | chr8  | 13665131  | 8  | 61 | 0 | 61 | G | A | ATTTTAAATATAGACACC[G/A]TACTAGTCTTAAAAAATGG     |
| SJHQ | SJLGG029 | chr8  | 20222660  | 15 | 62 | 0 | 41 | C | G | TTCAATAGCCAATTTCC[C/G]TTTTTTGTCTCCATCTTTCC     |
| SJHQ | SJLGG029 | chr8  | 36772049  | 17 | 63 | 0 | 35 | G | A | GTAATGATAAACATAATG[C/G]AAGCCAAGCTAGGACCATCA    |
| SJHQ | SJLGG029 | chr8  | 84410079  | 12 | 91 | 0 | 55 | A | T | TTTCAATGATAAACATTA[A/T]CTTGTACCGAAGTACCAGTC    |
| SJHQ | SJLGG029 | chr9  | 112388285 | 12 | 82 | 0 | 44 | A | G | GAATGAGCTACAGGTATGTT[G/A]AAATCAAACCTCTGGATT    |
| SJHQ | SJLGG029 | chr9  | 16077526  | 11 | 40 | 0 | 49 | G | T | GATTATGCTCACCCCTTGT[G/T]CTCCTGCCTTTTTTCATGAG   |
| SJHQ | SJLGG029 | chrX  | 91363380  | 13 | 38 | 0 | 22 | C | T | GACACTGTACTTAAATCAG[C/T]GTGATCCATTTTGAATATT    |
| SJHQ | SJLGG029 | chrY  | 8483496   | 13 | 25 | 0 | 26 | G | A | CCTGCACCCAACTCTTCA[G/A]GAATGGAGTCAGAAAAGCAG    |
| SJHQ | SJLGG030 | chr11 | 109526305 | 6  | 44 | 0 | 46 | C | T | AAAGTGTGTGTCAGAAA[A/C]TGCGCTCCCTGTCTAGCAAGG    |
| SJHQ | SJLGG030 | chr1  | 119548521 | 13 | 45 | 0 | 39 | C | T | ATGAAATGCTCAGACTCTC[T/C]CTAGCGGAGCTAGTGAAG     |
| SJHQ | SJLGG030 | chr12 | 13253854  | 15 | 43 | 0 | 27 | C | A | CCCGAGTTTTGGAACTT[C/A]AATCAGTGGGAAGGACCCCT     |
| SJHQ | SJLGG030 | chr1  | 31504187  | 13 | 70 | 0 | 45 | C | T | AACCAGAAATATAAAATTT[C/T]TATATATGTCCTCAAGGAA    |
| SJHQ | SJLGG030 | chr13 | 33276383  | 10 | 53 | 0 | 43 | C | T | TTTTGGTCAATGACCCCTG[C/T]AAATAGAGAGCCCTACTTT    |
| SJHQ | SJLGG030 | chr13 | 88658686  | 15 | 81 | 0 | 48 | G | A | TTTTTTTGTGCACATTTTAC[G/A]TAAATATATGTGCTGATA    |
| SJHQ | SJLGG030 | chr16 | 15263188  | 8  | 50 | 0 | 38 | C | T | GCTAGCTTGTCCATCAGGA[C/T]CCCTCTTCTCACTGTGCAAA   |
| SJHQ | SJLGG030 | chr2  | 177092934 | 7  | 57 | 0 | 36 | T | C | AAGGAAGCACCCTGGTAGT[A/T]C]GCTATAAAGGAAAGTATTG  |
| SJHQ | SJLGG030 | chr2  | 82617273  | 19 | 55 | 0 | 57 | G | A | CCTTTTCTGCAATAATC[G/A]CCTCAAATATCAATGAAGC      |
| SJHQ | SJLGG030 | chr3  | 134057922 | 11 | 47 | 0 | 30 | G | A | CTTGGTGTACCAAGCC[C/G]AAGAGGGTGCCTGCTACTCAA     |
| SJHQ | SJLGG030 | chr3  | 146331270 | 9  | 64 | 0 | 56 | A | G | TTATGAGTTGTTAAATAT[A/G]AGTGTGTTAAAAAATTTTG     |
| SJHQ | SJLGG030 | chr3  | 60367449  | 8  | 62 | 0 | 57 | G | A | TAACTTTCTAGTATCAACT[G/A]TATATACATCACTACTCT     |
| SJHQ | SJLGG030 | chr4  | 139671011 | 14 | 73 | 0 | 44 | A | G | AAAAAATGACTTGAGAGGG[A/G]AAAAAGTTCTGCCATTCTC    |
| SJHQ | SJLGG030 | chr4  | 181553829 | 6  | 57 | 0 | 44 | C | T | GTAGAGAAATGTTAAATA[A/C]TGACCACTCTGCTCTGATA     |
| SJHQ | SJLGG030 | chr4  | 24929190  | 9  | 53 | 0 | 47 | A | G | ATAGTTGTAACGTTGATTA[A/G]GCAGGTGCTGAAACCTTCTC   |
| SJHQ | SJLGG030 | chr5  | 28538734  | 11 | 62 | 0 | 46 | A | G | CAACTCCAACAACCTAAAG[A/G]CCTTATCTAAGTACGCAAGC   |
| SJHQ | SJLGG030 | chr6  | 134972392 | 13 | 46 | 0 | 34 | G | A | TAGGGAATAGTAGACTC[G/A]TAGGTGCCAAACCTTTTGG      |
| SJHQ | SJLGG031 | chr13 | 26650190  | 7  | 45 | 0 | 32 | C | T | GGAAATTTTCTGGAAATGA[C/T]AAGACTCTGAAAAACAAT     |
| SJHQ | SJLGG031 | chr17 | 32381249  | 6  | 50 | 0 | 35 | C | T | ATCAGTGTTTTCAATACATG[C/T]GCTCCCTTCCCTACTGCTC   |
| SJHQ | SJLGG031 | chr3  | 74679683  | 7  | 64 | 0 | 42 | C | T | AAGAATATGCTGCGCTATG[C/T]TACTAAATATAAGATTAGA    |
| SJHQ | SJLGG031 | chrX  | 26594603  | 9  | 74 | 0 | 52 | C | T | AAAAAGCAAATGCAGATGA[C/T]ATGGGGGAGAATATAATTA    |
| SJHQ | SJLGG032 | chr10 | 5697899   | 9  | 33 | 0 | 39 | C | T | TAGCGTCTCCGCTGCCACA[C/T]GCAAGATGACTAAGATGCA    |
| SJHQ | SJLGG032 | chr11 | 22918712  | 7  | 42 | 0 | 37 | C | T | TTCTTCTCAGCCTCATTAG[C/T]TAGCTGCGCGGGTTGTAAG    |
| SJHQ | SJLGG032 | chr12 | 118472378 | 7  | 24 | 1 | 39 | C | T | AGACACCTGTGATACCAAG[C/T]GCTCTCTGTCTCTCTCTC     |
| SJHQ | SJLGG032 | chr12 | 82458658  | 4  | 40 | 0 | 51 | C | A | TTATCTCTTCTGGAATATG[C/A]TAAACCTCTGCAAGATATT    |
| SJHQ | SJLGG032 | chr13 | 66069427  | 18 | 50 | 0 | 58 | A | T | TTCTGTAATCTTATGAA[A/T]ATTTTAAAGATAATAGGTTA     |
| SJHQ | SJLGG032 | chr13 | 93502273  | 16 | 47 | 0 | 30 | C | T | AAGATTCAGTGGCAAGACC[C/T]GGAAATCTTCAGTAAGTTGA   |
| SJHQ | SJLGG032 | chr14 | 94574973  | 14 | 30 | 0 | 25 | G | A | TCTGAATATACTGCCCTCC[C/G]AGGGGCCCTCCAGAGAGAA    |
| SJHQ | SJLGG032 | chr15 | 75993176  | 6  | 24 | 0 | 30 | G | A | TGGTACTGTGGGTCTGAC[C/G]CTGCTGACCTGAAATCT       |
| SJHQ | SJLGG032 | chr1  | 62593909  | 13 | 35 | 0 | 17 | G | T | AAGATGCATTAGATAAACTT[G/T]ATACCTTTAGAATTCATTA   |
| SJHQ | SJLGG032 | chr16 | 59697054  | 4  | 36 | 0 | 45 | G | T | CATGCAGTGTAAACAAGAG[G/T]GCTTACTGTCTTTATTGTAA   |
| SJHQ | SJLGG032 | chr17 | 38989749  | 15 | 43 | 0 | 47 | C | T | ATTTCTGCTTCCCTCCCT[C/C]TCTGCTTCTTCTCTCCATC     |
| SJHQ | SJLGG032 | chr17 | 40429238  | 4  | 20 | 0 | 22 | G | A | ACTCTCTTCTCCTGCTAC[G/A]TCTATCTCCCGAGCTGGCC     |
| SJHQ | SJLGG032 | chr1  | 83877684  | 7  | 28 | 0 | 51 | A | T | GAGAGCTGACTAAAGAAGAT[A/T]GAAATGAAAAGGAAACATTGC |
| SJHQ | SJLGG032 | chr18 | 45372310  | 4  | 40 | 0 | 47 | C | A | AGATAATGCTTTCTGAAGT[C/A]TAACTTTAAATATACTACTG   |
| SJHQ | SJLGG032 | chr1  | 89457108  | 14 | 39 | 0 | 38 | C | T | GGCTACAGCTAATAATGCG[C/T]GCCCAACTGTTTACAAGAGT   |
| SJHQ | SJLGG032 | chr1  | 97392903  | 4  | 28 | 0 | 30 | C | T | GTTTGGAGGCCATTAGAT[C/T]JAGGCAACAGCTTTCTCATG    |
| SJHQ | SJLGG032 | chr20 | 13000662  | 12 | 51 | 0 | 45 | G | T | CTGACTTCTCAGATCCCA[G/T]ATTAGAACTTTGGCTCTGA     |
| SJHQ | SJLGG032 | chr2  | 116042957 | 20 | 51 | 0 | 34 | G | T | AAAGCCGGTAATAATGAAC[G/T]TAAATAGGGAAGAAAAGAC    |
| SJHQ | SJLGG032 | chr21 | 17551055  | 4  | 34 | 0 | 41 | T | G | TATTTCAATTTCCCATCTCC[T/G]GATGGCAAGGACTCTATCAT  |

|      |          |       |           |    |    |   |    |   |   |                                                |
|------|----------|-------|-----------|----|----|---|----|---|---|------------------------------------------------|
| SJHQ | SJLGG032 | chr2  | 154230002 | 8  | 44 | 0 | 33 | T | G | TGTTTGTGTGCTTCTGACC[T/G]GAGGATCCCTATATACAATT   |
| SJHQ | SJLGG032 | chr2  | 217719446 | 8  | 20 | 0 | 37 | G | A | TTACAGAGCAGCGGGCAC[C/G/A]CCAGGACATCTGTCTTCAA   |
| SJHQ | SJLGG032 | chr2  | 4631233   | 6  | 47 | 0 | 37 | A | G | TTGAAGATATTCACGATAGG[A/G]GAGAGCACAAGCAGTTAGAG  |
| SJHQ | SJLGG032 | chr2  | 53426355  | 13 | 41 | 0 | 38 | G | A | GCCTGACATATAAAGGTAC[G/A]GAAATGAAATTTGCCATAT    |
| SJHQ | SJLGG032 | chr4  | 182268572 | 7  | 26 | 0 | 41 | G | A | CCTTATAGCTATGTAAGGG[G/A]AAAAATCTATCCTTATTA     |
| SJHQ | SJLGG032 | chr5  | 21353967  | 4  | 38 | 0 | 42 | A | C | TATAAGCAGTCCGATTATTA[A/C]AAAAATATGTCCCTGATTCT  |
| SJHQ | SJLGG032 | chr6  | 90218700  | 15 | 29 | 0 | 23 | G | T | GAGGAGGTGCTCCAAAAG[G/T]TGTGTGGAGCTGTTTGTGTA    |
| SJHQ | SJLGG032 | chr7  | 139042118 | 12 | 59 | 0 | 49 | T | A | CACCTCTCAATTTTGATCAT[T/A]ATGTATTGATAGACTATTT   |
| SJHQ | SJLGG032 | chr7  | 77762972  | 13 | 35 | 0 | 37 | A | C | TTCTTTGCTAATAACATCA[A/C]TTTCAACTGAAATTGACTC    |
| SJHQ | SJLGG032 | chr7  | 85652306  | 4  | 31 | 0 | 40 | G | A | CAATCAGGCAGACCAAAT[G/A]TAAGTGTCCCAAGATAGCT     |
| SJHQ | SJLGG032 | chr8  | 128111019 | 5  | 32 | 0 | 51 | A | G | TGATTTGTCCAAGCCCCAA[A/G]TTTAAGCAGTTTGAGAGGTA   |
| SJHQ | SJLGG032 | chr8  | 49294619  | 4  | 21 | 0 | 26 | G | A | AGAAGCCAATGGGAGGTAGA[A/G]AAGCAGGGAAGGCAAGTGGA  |
| SJHQ | SJLGG032 | chr8  | 87744145  | 14 | 38 | 0 | 42 | A | C | ATGTGGGCATGATACAAA[A/C]CTTCCATTTACTTAACAGAG    |
| SJHQ | SJLGG032 | chr8  | 95479118  | 4  | 35 | 0 | 41 | C | T | AGGTACTTACTTATCAT[C/C]TAAAGTTTATTTATAGACT      |
| SJHQ | SJLGG032 | chr9  | 10066282  | 6  | 53 | 0 | 40 | C | T | TCTGAACCTTAACCACAT[C/C]TJAAAAATATGTTTATCTATT   |
| SJHQ | SJLGG032 | chr9  | 10366174  | 4  | 34 | 0 | 37 | G | T | TGTAGTCTGCTGATATAT[G/T]CTCTGCGATGTATGCTCC      |
| SJHQ | SJLGG032 | chr9  | 104576807 | 4  | 38 | 0 | 50 | T | C | CCTACCAAGTTAATAAGT[T/C]TJGGCCTGACCAAAAGCCAAA   |
| SJHQ | SJLGG032 | chr9  | 78167561  | 6  | 42 | 0 | 44 | T | C | TCAGATTTCTTTGACCAAT[C/T]GTGGGAGAGGAAGAATCTG    |
| SJHQ | SJLGG032 | chrX  | 32157938  | 7  | 24 | 0 | 24 | T | G | CTTAAACATTTAAAAC[T/T]G/TATAGAAAATTTTGCTGCC     |
| SJHQ | SJLGG032 | chrY  | 23976150  | 3  | 9  | 0 | 16 | C | A | GCCGTTCCAGTGACCCTT[C/A]JAGAGTGTGCAAAAGCCTCCT   |
| SJHQ | SJLGG033 | chr10 | 48325301  | 10 | 36 | 0 | 29 | C | T | CAATGTCTTCAAGCCAG[C/T]GCAACACACGTGCTGCCCCAG    |
| SJHQ | SJLGG033 | chr10 | 78663341  | 13 | 51 | 0 | 35 | C | T | CACCTGTAGCTCCTGCCCT[C/T]JGGGAGGCCATGTGCCCTCT   |
| SJHQ | SJLGG033 | chr11 | 38303765  | 8  | 52 | 0 | 42 | G | C | ATCCCTCTTAAAGATTTT[G/C]TCAAAATTCACAGTGATGGAC   |
| SJHQ | SJLGG033 | chr1  | 213936838 | 8  | 66 | 0 | 36 | C | T | CATGGACCCAAGGTCAAT[C/T]GAGCAGGAAGAGCTCTATTC    |
| SJHQ | SJLGG033 | chr12 | 64777529  | 15 | 56 | 0 | 41 | G | T | AAAAAAATGATTAATAAA[A/T]AAGTCCCAACATATAATCA     |
| SJHQ | SJLGG033 | chr12 | 85451022  | 18 | 81 | 0 | 28 | A | T | AATAGCTCTTAAAGTATA[A/T]CTTTTTCAGATCTTAAAAA     |
| SJHQ | SJLGG033 | chr12 | 86667529  | 20 | 56 | 0 | 29 | C | T | GCCAGTGTATACACTGCATA[C/T]GATAACAGAGTGAATATA    |
| SJHQ | SJLGG033 | chr13 | 36561924  | 9  | 47 | 0 | 35 | G | A | ACACTTCTCTTTTCCCT[C/G]AGACTTGAGGTAACCCAATAC    |
| SJHQ | SJLGG033 | chr13 | 69457534  | 10 | 77 | 0 | 42 | C | T | TGTTAGCGAGAACGAGAAC[A/C]TGTGCAAGGTGAAAATAATTT  |
| SJHQ | SJLGG033 | chr15 | 34059622  | 5  | 40 | 0 | 49 | G | A | GTGTGTTCTTAAGCTATA[G/A]GCCAGGGGGTCCCAACTCTT    |
| SJHQ | SJLGG033 | chr16 | 29952730  | 6  | 43 | 0 | 31 | C | A | TATGTCCTTCACTTCTT[C/A]CAAAAAGCCACTTCCCTCCT     |
| SJHQ | SJLGG033 | chr16 | 81443035  | 5  | 20 | 0 | 24 | C | T | CCATGTCAGTGGCCACCAC[C/T]GAGCTGGCCCTGGTCCAGCT   |
| SJHQ | SJLGG033 | chr1  | 92435166  | 10 | 68 | 0 | 42 | G | A | ATTTAAATGTAAAACCAG[C/G]ATGTCAATTTGTTGCTGACTA   |
| SJHQ | SJLGG033 | chr20 | 34233781  | 8  | 37 | 0 | 41 | G | A | CTAATGTGTGGAGTATAGT[G/A]AGTGTGGCATTACAAACTT    |
| SJHQ | SJLGG033 | chr2  | 227746667 | 14 | 56 | 0 | 42 | A | C | TGTTAATGAGTGGTACAC[A]AATCCAAAGTATGTTCTTATT     |
| SJHQ | SJLGG033 | chr2  | 57958493  | 29 | 81 | 0 | 35 | G | A | ATATATGTTGCTATCCATT[G/A]JAGACTAAGTTTAAACACAAG  |
| SJHQ | SJLGG033 | chr4  | 161740034 | 14 | 62 | 0 | 41 | A | G | ATCTGTGAAAAAATACTC[A/G]AAATATGTTTATGTTTAT      |
| SJHQ | SJLGG033 | chr4  | 4432342   | 8  | 53 | 0 | 41 | G | A | GTGTCTTATAGACAATGACT[C/G]A]GGCAGGTGAATGAAACAGA |
| SJHQ | SJLGG033 | chr4  | 64637350  | 16 | 61 | 0 | 56 | A | T | TGCTATTCTCCCTGGTTT[A/T]AACTATCAGTCAAGTGTCA     |
| SJHQ | SJLGG033 | chr5  | 26650446  | 8  | 58 | 0 | 38 | T | C | CCCTTTCTTACTCTTTT[A/T]TAACTATCAGTGTGAAGAGA     |
| SJHQ | SJLGG033 | chr5  | 97969729  | 18 | 58 | 0 | 35 | A | C | TATGTGCTACTCAAAAA[A/C]CATTTTTGTCTGTCTCAGCT     |
| SJHQ | SJLGG033 | chr7  | 42785110  | 7  | 49 | 0 | 39 | T | G | TCTGTGATCTATTCTTTGGG[T/C]CTCATCCCTATGAAGCAG    |
| SJHQ | SJLGG033 | chr8  | 115599785 | 8  | 49 | 0 | 45 | A | G | TGGTCATTCCAGAACTACT[A/G]TTGAGACATAATATATGGT    |
| SJHQ | SJLGG033 | chr8  | 41317240  | 9  | 59 | 0 | 42 | G | C | ACTTTTTACCTTTGCAACA[A/G]ATAACGAAACAATAAGTA     |
| SJHQ | SJLGG033 | chr8  | 41317257  | 11 | 56 | 0 | 37 | G | C | CAAGATAACGAAAAAATA[A/G]G]TAATCAAACCACGACTATT   |
| SJHQ | SJLGG033 | chr8  | 69654136  | 8  | 65 | 0 | 45 | C | T | CATTTAGGTTTATAGAAATTT[C/T]AATTAGCACTCACACTCCT  |
| SJHQ | SJLGG033 | chr8  | 79990340  | 12 | 49 | 0 | 34 | C | T | TGGGGTTCGCTCGATGACCC[C/T]GGATGGGGGGTCCACATGC   |
| SJHQ | SJLGG034 | chr10 | 116041409 | 11 | 34 | 0 | 33 | C | T | TGCTTGACCTGCAGAGCCT[C/T]GTGTGGACACTGTGTTGTGTG  |
| SJHQ | SJLGG034 | chr10 | 30659172  | 17 | 37 | 0 | 26 | C | A | ATCTCCAGCCACCTGTTG[C/A]TCTCTGCTGAATTTTTTACA    |
| SJHQ | SJLGG034 | chr10 | 37587234  | 32 | 57 | 0 | 24 | C | T | AGAAGTAAACAAGAGGTTG[A/C]TGTGCAATAAGCGTTCAAAA   |
| SJHQ | SJLGG034 | chr10 | 48490176  | 17 | 48 | 0 | 27 | A | G | GGCACAGTTTTGCTCCTG[C/A]G]TCTCTTATTTACCCCTTT    |
| SJHQ | SJLGG034 | chr10 | 53098777  | 14 | 43 | 0 | 31 | A | G | TATATCATTTCACTGTAC[A/G]TGAAGTATTCATTAATTTG     |
| SJHQ | SJLGG034 | chr10 | 75547730  | 21 | 45 | 0 | 37 | T | G | AGCAATTTGTGAGATGTAGT[G/T]TGTGCTATGTTACTACTT    |
| SJHQ | SJLGG034 | chr11 | 103421922 | 22 | 58 | 0 | 22 | T | C | ACATTTATTTGAGCCAGCA[T/C]GACAAATTAGGAGAAAAACA   |
| SJHQ | SJLGG034 | chr11 | 109322626 | 29 | 63 | 0 | 46 | C | A | AGAGTTCTTTCCAGAAATGG[C/A]TTAGTCAAACCTTACCAGAC  |
| SJHQ | SJLGG034 | chr11 | 125012325 | 10 | 26 | 0 | 16 | C | T | CTTCTGAAATCCGCTT[C/C]TCCAGGCCTGGCACTGCTCA      |
| SJHQ | SJLGG034 | chr11 | 37720324  | 7  | 54 | 0 | 39 | T | C | ATATTGCTAAGAAATCTTAA[T/C]ACCTAACTCATATCTATTCC  |
| SJHQ | SJLGG034 | chr1  | 147002106 | 19 | 48 | 0 | 49 | T | C | ACAATAATAATTTATCTAA[T/C]GCCTCCTCAATTAACCTAGC   |
| SJHQ | SJLGG034 | chr11 | 58404759  | 28 | 57 | 0 | 38 | G | T | AGCACCTATCTCAGAGTCT[G/T]TCTGATGCTCTGAGGCTGAG   |
| SJHQ | SJLGG034 | chr1  | 168984667 | 15 | 39 | 0 | 29 | C | T | ACCCATACAGCCCTCTCT[C/T]CTCTACTCCACCTCCAGAG     |
| SJHQ | SJLGG034 | chr1  | 173632171 | 9  | 26 | 0 | 21 | A | G | TTAATTTCTCAGTGTCTG[A/G]TGAATCACTCCACCTCCACCTC  |
| SJHQ | SJLGG034 | chr11 | 8149261   | 28 | 59 | 0 | 41 | A | G | AGCAGGATTTAATGGAGGCT[A/G]CTTATTCTTCTTAAAACC    |
| SJHQ | SJLGG034 | chr1  | 187222558 | 15 | 44 | 0 | 32 | T | C | TGCGTTTTTGTAGACCTGACA[T/C]TTTCTCTGCTAGCCTAAG   |
| SJHQ | SJLGG034 | chr12 | 126193407 | 17 | 43 | 0 | 30 | T | C | GGCTCATTTCTCTCATGG[C/T]C]CATTGCTCTTCCAGCTCTG   |
| SJHQ | SJLGG034 | chr12 | 128711362 | 20 | 57 | 0 | 42 | A | G | CTTAGCATTTAACTCCCCG[A/G]GTATAATCACTCCCACTTA    |
| SJHQ | SJLGG034 | chr1  | 216493378 | 40 | 76 | 0 | 40 | T | G | ACTAACATATAAGCCATAT[T/G]ATGTAAACAAAATGATAGAA   |
| SJHQ | SJLGG034 | chr1  | 216493401 | 38 | 78 | 0 | 36 | A | T | TGTAACAAAATGATAGAAAT[A/T]TAAGCATTTTATATAGTTTG  |
| SJHQ | SJLGG034 | chr12 | 25891803  | 15 | 39 | 0 | 27 | C | T | TCTGCCTGATGGAAGGAGG[C/T]CCACAGTCCACAGTGGGGC    |
| SJHQ | SJLGG034 | chr1  | 226715262 | 7  | 29 | 0 | 30 | G | T | GAGCCAGAGCCAGGACGCT[G/G]TGGACACACTCTGGGGGC     |
| SJHQ | SJLGG034 | chr12 | 33976184  | 28 | 64 | 1 | 38 | A | G | AAATATCTTTTAAAAGGG[A/G]AAAAAATATAGCTTAAAGAA    |
| SJHQ | SJLGG034 | chr12 | 42299650  | 27 | 50 | 0 | 28 | C | T | ATCCGCCACCTAATGCTGT[C/T]GCAAACAGGGGAAGCAGGTG   |
| SJHQ | SJLGG034 | chr12 | 4678410   | 26 | 67 | 0 | 42 | A | T | TTATAGGTGCAATTTTAA[T/C]T]CCTAAAACAACTTATTTTG   |
| SJHQ | SJLGG034 | chr12 | 66858326  | 25 | 60 | 0 | 58 | T | C | TTTATGGTAGCAGGATTTAA[T/C]TGTCAACAATTGAGAAAAAC  |
| SJHQ | SJLGG034 | chr12 | 71219231  | 16 | 39 | 0 | 35 | A | T | GCAAACTGCATCCAATCCA[A/T]ACATACCTCTTGTATACCA    |

|      |          |       |           |    |     |   |    |   |   |                                               |
|------|----------|-------|-----------|----|-----|---|----|---|---|-----------------------------------------------|
| SJHQ | SJLGG034 | chr12 | 74152826  | 36 | 79  | 0 | 54 | G | T | TAGTATTACATAAGAATT[G/T]TAAAGATATGCTATCCATT    |
| SJHQ | SJLGG034 | chr12 | 74228426  | 26 | 52  | 0 | 33 | T | A | AAGACAGTGGTGGAAAGTA[T/A]AAACCAAGCAGAAGAATTG   |
| SJHQ | SJLGG034 | chr12 | 87924693  | 23 | 52  | 0 | 32 | C | T | AATAAAGGTAATAATTTAT[C/T]GGGAAAAAGCCACCAATA    |
| SJHQ | SJLGG034 | chr12 | 96987586  | 32 | 77  | 0 | 42 | A | G | CCTTAACTTACATTTTACT[A/G]CATTAAATTAAGTAGCA     |
| SJHQ | SJLGG034 | chr13 | 104508681 | 23 | 64  | 0 | 42 | T | A | ATTAACAAAATAATCAA[T/A]TCAGAGTTAACTAAACAATT    |
| SJHQ | SJLGG034 | chr13 | 106663563 | 23 | 54  | 0 | 44 | A | T | CAAAAAGAAATATCCCA[C/T]TAAATGGATGGTGTATGCTT    |
| SJHQ | SJLGG034 | chr13 | 110549784 | 18 | 51  | 0 | 45 | A | G | TTTGTGACCTTCCATGATAC[A/G]GCTGTATTTTCTGAATTA   |
| SJHQ | SJLGG034 | chr13 | 19700061  | 23 | 48  | 0 | 39 | C | T | TTCAAGATTTCTGACAGT[A/C]TGTTCATTGTCTGCTTTATCT  |
| SJHQ | SJLGG034 | chr13 | 23556449  | 14 | 36  | 0 | 35 | C | T | AGGAGTTAATGATTAAGAGG[C/T]GCCTTGAGTTCGGTCCACT  |
| SJHQ | SJLGG034 | chr13 | 57602456  | 31 | 77  | 0 | 38 | C | T | TTGCATATTGCATAAAAGAA[C/T]GTGAGAATGATTA AAAAGC |
| SJHQ | SJLGG034 | chr13 | 59930510  | 8  | 58  | 0 | 36 | C | G | TAAAATACCAAGTTAGCAT[C/G]CCTACAGTATCTGTACAT    |
| SJHQ | SJLGG034 | chr13 | 69565141  | 24 | 68  | 0 | 37 | A | G | CTGGCATCTCTGTATCACAG[A/G]AATTTCTTACTATTTGGAC  |
| SJHQ | SJLGG034 | chr13 | 71341198  | 27 | 52  | 0 | 32 | T | C | TATTATTTGAACATTTGGA[T/C]JAGAAAATCTTCCAAAATGT  |
| SJHQ | SJLGG034 | chr13 | 90800862  | 20 | 54  | 0 | 49 | A | T | GGTAAATAGTAAGAACT[A/T]TTTATATACATTAATTTTCT    |
| SJHQ | SJLGG034 | chr14 | 19117195  | 22 | 127 | 0 | 86 | G | C | AATGCAAAATCAGTTGATA[G/C]TTTAAATGGTATAGTAGTTT  |
| SJHQ | SJLGG034 | chr1  | 42619771  | 16 | 18  | 0 | 31 | G | A | ATGGGAGATGGGAGTAGT[C/G]TTCACAGCAGGGCCTGTCTGC  |
| SJHQ | SJLGG034 | chr14 | 58724817  | 6  | 45  | 0 | 33 | C | T | CATACTTAAAAATAGAACT[C/T]GTCGATAAGTATTAGGGCAA  |
| SJHQ | SJLGG034 | chr14 | 80888766  | 30 | 64  | 0 | 23 | G | A | TTATGTACCTTTTCTTAGC[A/T]CTTGTGCTTTTCTTTGAG    |
| SJHQ | SJLGG034 | chr15 | 24638235  | 20 | 55  | 0 | 44 | T | A | GATTCTGCTTACAGAGACC[T/A]GAAATGAACCTTTAGACACC  |
| SJHQ | SJLGG034 | chr15 | 47480578  | 31 | 70  | 0 | 52 | G | A | TCATTTATATTTCTGTAAC[G/A]TGAAAGCATACATTAATGGG  |
| SJHQ | SJLGG034 | chr15 | 82080279  | 17 | 55  | 0 | 24 | A | G | GGTGTTTTTAGACAGATCA[A/G]TTCCACCATGAGAGCTAAAG  |
| SJHQ | SJLGG034 | chr15 | 98435197  | 27 | 60  | 0 | 28 | G | C | GGGTGATGCGAGCCACCCTT[G/C]AACAGGTGGACTGATGGTA  |
| SJHQ | SJLGG034 | chr15 | 98988109  | 11 | 26  | 0 | 22 | G | C | GCTGAGCTGAGAAAGCTGA[G/C]CTGAGAAAGCCCTGCCATGG  |
| SJHQ | SJLGG034 | chr16 | 10398194  | 17 | 62  | 0 | 48 | C | T | ATAAAGAAAAGCAATTGATT[C/T]CATGCCACCAATTTAGTAA  |
| SJHQ | SJLGG034 | chr16 | 24015331  | 30 | 65  | 0 | 36 | G | A | TGCTATTTTATTGTTGCAC[G/A]GACATTAATGATTCATAATA  |
| SJHQ | SJLGG034 | chr16 | 59183438  | 25 | 45  | 0 | 36 | A | G | CTTTAAAGACAAAACCTGGG[A/G]TTGTGTAATTTCTTAGTCT  |
| SJHQ | SJLGG034 | chr16 | 60597694  | 22 | 65  | 0 | 30 | C | T | GAAAGGCTGTGCTAAGAAG[C/T]JAAGTTACTGACAGATGTGTG |
| SJHQ | SJLGG034 | chr16 | 64018617  | 28 | 63  | 0 | 30 | C | A | TATTTTCTGCTGATTAGAT[C/A]TATTAATTTTACAAAGA     |
| SJHQ | SJLGG034 | chr16 | 6586984   | 23 | 56  | 0 | 29 | C | G | CTAAGGGGATTCCTTCCAT[A/C]CATTTGCTTTTCTGGGGAAA  |
| SJHQ | SJLGG034 | chr16 | 74216697  | 18 | 51  | 0 | 31 | G | A | AACACTTCTTCCATATTC[C/G]AATAACTTTAATCCTCCAG    |
| SJHQ | SJLGG034 | chr16 | 83030202  | 25 | 48  | 0 | 30 | T | A | AACAACAAAACGACCTTTG[T/A]TAAAGTTTACGCCCTATAAG  |
| SJHQ | SJLGG034 | chr17 | 20148708  | 9  | 36  | 0 | 35 | T | G | TGAATGCCCGGTGCCCTGCC[T/G]CTCTTCTCTGATTCAGGTC  |
| SJHQ | SJLGG034 | chr17 | 21757898  | 19 | 42  | 0 | 21 | C | T | TTGGCCAAGCGTGGCCAGG[C/T]GCGGTGGCTCACGAAATCAT  |
| SJHQ | SJLGG034 | chr17 | 36499857  | 17 | 35  | 0 | 29 | G | C | CTCTCAACGTACCAGCTG[C/G]CTTCTGGATGATGATGATGAG  |
| SJHQ | SJLGG034 | chr1  | 73940058  | 14 | 25  | 0 | 37 | C | T | GAGAATCTGTGCTGTTC[C/T]CAATGGATGGCTGGGAAAAT    |
| SJHQ | SJLGG034 | chr1  | 74118877  | 23 | 38  | 0 | 27 | T | A | ACCTGAAAGAAAGTTAGCAT[T/A]AGCTTAAACCTTCCCTTAAA |
| SJHQ | SJLGG034 | chr17 | 50590473  | 21 | 44  | 0 | 36 | C | T | TAATAATTTCTCAAATGTGC[C/T]TGAATATTTATTTACTTTT  |
| SJHQ | SJLGG034 | chr18 | 26357397  | 19 | 52  | 0 | 45 | A | C | TTGAATCAGGGTCTAGAA[A/C]CTAAAAAAAATAATACTA     |
| SJHQ | SJLGG034 | chr18 | 28163529  | 25 | 55  | 0 | 42 | C | T | AGTATTTTGTAGAAAA[C/T]GAGAATCTGCATCTTTCTC      |
| SJHQ | SJLGG034 | chr18 | 57856654  | 27 | 68  | 1 | 29 | G | T | ACATTATGTCTAAGTGCAT[G/T]TATGTGCTGCTCTCTGTTT   |
| SJHQ | SJLGG034 | chr1  | 89022839  | 27 | 37  | 0 | 34 | G | A | GCATTCAGCTGGAGCTGGGC[G/A]CAAAGTTCAGATAAGCTTT  |
| SJHQ | SJLGG034 | chr18 | 9453242   | 39 | 77  | 0 | 47 | G | A | GTTCTCAGCAACATTTTGC[G/A]AAATAAGTTACTACTTATA   |
| SJHQ | SJLGG034 | chr1  | 92254405  | 22 | 34  | 0 | 49 | A | C | CAGAGAGTGTCTTTGAAAA[A/C]CATTTGCTAACCAACTTTTC  |
| SJHQ | SJLGG034 | chr19 | 28803412  | 26 | 39  | 0 | 39 | A | G | GCACCTGATTAATAGCCCC[C/T]GCAAAATGGCTCTCAAGGGC  |
| SJHQ | SJLGG034 | chr20 | 13895646  | 23 | 49  | 0 | 28 | G | A | ATTTTACTTTTATAACTT[C/G]ATTTTGAAGGTAAGACCCAGA  |
| SJHQ | SJLGG034 | chr20 | 42200817  | 11 | 31  | 0 | 35 | G | A | GAGAGGGGAGGTGATGAGT[G/G]GTGAGCCACAGCTCCTGAT   |
| SJHQ | SJLGG034 | chr2  | 100372473 | 22 | 42  | 0 | 37 | A | G | TGGGCTCCTTAGGAAAGGTA[A/G]CTGTGCACATGGTGGGATA  |
| SJHQ | SJLGG034 | chr2  | 109540931 | 19 | 32  | 0 | 19 | C | T | AGTCGATTAATAACGTGAG[C/T]GGTCCAACTTTCCCTTAT    |
| SJHQ | SJLGG034 | chr21 | 24943566  | 17 | 56  | 0 | 52 | A | G | TCATCCTAGAGAACTGAAAC[A/G]TTTGGCAAAAATGTTTTT   |
| SJHQ | SJLGG034 | chr21 | 26693702  | 32 | 59  | 0 | 45 | T | C | GAACAAGGTGAGAGAAGTTA[T/C]CTGGATGATAGAGAGAAG   |
| SJHQ | SJLGG034 | chr2  | 139107884 | 23 | 63  | 0 | 29 | T | G | TTTTTAAACCCTTTTTTTT[G/G]CAAAATCAGTGGGCAAAAAT  |
| SJHQ | SJLGG034 | chr2  | 144690081 | 25 | 59  | 0 | 43 | C | T | AAGAAATCTTACTTACTCG[C/T]CTTTTCTATGGCTAAAGGA   |
| SJHQ | SJLGG034 | chr2  | 154871676 | 27 | 65  | 0 | 44 | T | C | AAAAGATATGGTACTTTT[C/T]CTAATACAGAGTTTGAAGT    |
| SJHQ | SJLGG034 | chr2  | 159517077 | 7  | 51  | 0 | 33 | C | A | TAGTCACAGTTTGCAAAT[C/A]TCAATTTGCATAATTTTACA   |
| SJHQ | SJLGG034 | chr2  | 163740740 | 13 | 41  | 0 | 39 | T | A | GGAGTCATTAACAGGACATA[T/A]GATAGGAAGTTGGGTTTAT  |
| SJHQ | SJLGG034 | chr2  | 174461102 | 30 | 60  | 0 | 43 | T | C | TTTGTGAGGATTTGTCT[C/T]GGCTAATCAGCTGTGGTCA     |
| SJHQ | SJLGG034 | chr2  | 202251902 | 27 | 62  | 0 | 39 | C | T | GATAATACAGAGAATCATTT[AATGAT]GTCATTGTTCCAG     |
| SJHQ | SJLGG034 | chr22 | 19345510  | 16 | 42  | 0 | 26 | G | A | CGGGCAACAAGGAGCTCT[C/G]CAGTGTGTGACTGAATCTCT   |
| SJHQ | SJLGG034 | chr2  | 222715122 | 15 | 45  | 0 | 31 | T | C | ATGCCCTGGCTGCACCTGG[T/C]GCAAAATGACACAGTTCTCA  |
| SJHQ | SJLGG034 | chr2  | 242857121 | 9  | 23  | 0 | 25 | G | A | CCCAGGGTATGACCCCGCT[G/A]TCCAAACCCCGGCCAACCTG  |
| SJHQ | SJLGG034 | chr2  | 30011396  | 18 | 51  | 0 | 27 | C | T | CTTGGTATTCATGAAAG[C/T]GAAAGGAGGGGAACTAGACA    |
| SJHQ | SJLGG034 | chr2  | 33941840  | 24 | 74  | 0 | 44 | T | C | TCTTATCTATCAAGGACATG[T/C]CAGTATCTTTATTTTTC    |
| SJHQ | SJLGG034 | chr2  | 57416428  | 25 | 58  | 0 | 30 | T | C | TAATAATTTGAGATAGCAT[C/T]GAAAAAGAAATGCTGGAAAT  |
| SJHQ | SJLGG034 | chr2  | 60525168  | 9  | 41  | 0 | 26 | T | C | CTTTAAATCCATTTCCGACG[T/C]TATTGCACATTTCTTTGTGC |
| SJHQ | SJLGG034 | chr2  | 65993090  | 12 | 56  | 0 | 31 | C | T | CAGCAATGGACCCTTACAC[C/T]GAGAATAACATGGGAAGCAGC |
| SJHQ | SJLGG034 | chr2  | 68699940  | 29 | 60  | 0 | 29 | C | T | TCACATTTGTCATGATCC[C/T]GTTTAACTTTTACAACATT    |
| SJHQ | SJLGG034 | chr2  | 78601695  | 31 | 77  | 0 | 31 | A | G | GATTGCCCTTATGATGAA[A/G]CACAGTAAATGTAACACTAG   |
| SJHQ | SJLGG034 | chr2  | 78947486  | 21 | 49  | 0 | 36 | A | T | CATCTGCTTTGTTTTTCC[A/T]GTGTACAATCATGGCAAGTG   |
| SJHQ | SJLGG034 | chr3  | 107726701 | 11 | 35  | 1 | 25 | C | T | AATGGGAATGAGGAAAGGT[C/T]CTCTGTGGTTTAGGGAATG   |
| SJHQ | SJLGG034 | chr3  | 137552502 | 24 | 61  | 0 | 30 | T | C | TCTCTACACTTTTGTCA[T/C]CAAAAAGGCCCTTCACTCC     |
| SJHQ | SJLGG034 | chr3  | 147471986 | 29 | 61  | 0 | 34 | A | G | ACAGCTCAGTAACATATAGT[G/A]GAAAAAGGGGGTGGTTTC   |
| SJHQ | SJLGG034 | chr3  | 162942408 | 27 | 54  | 0 | 31 | G | A | TACTATACTACATAAGGCA[G/A]TATTTTATAGTCATGATCA   |
| SJHQ | SJLGG034 | chr3  | 188473684 | 17 | 42  | 0 | 25 | C | G | AAAACCATATACAGCTATG[C/G]CACTTCTCTGTTCAACCTG   |
| SJHQ | SJLGG034 | chr3  | 191410671 | 26 | 62  | 0 | 46 | G | A | AGATAAGCAATATCTCAT[C/G]TCTAGGCTGATGATTTCCCAA  |



|      |          |      |           |    |    |   |    |   |   |                                                |
|------|----------|------|-----------|----|----|---|----|---|---|------------------------------------------------|
| SJHQ | SJLGG034 | chr3 | 192887338 | 22 | 60 | 0 | 45 | C | T | GGCATTAAATAGAAACTG[C/T]AATGATTATATAAAAAATTT    |
| SJHQ | SJLGG034 | chr3 | 21903916  | 34 | 73 | 0 | 45 | G | A | CCTGAGATTCTTATATCAC[A/G]ATACGATTGTAAGAAATAGGA  |
| SJHQ | SJLGG034 | chr3 | 25540546  | 12 | 65 | 0 | 45 | C | G | TATGTGACAGGACTTGCAAC[C/G]TAAACAAGATTTCAGGCA    |
| SJHQ | SJLGG034 | chr3 | 30995014  | 23 | 63 | 0 | 36 | C | T | TCCTCCAGCTCAGTGTGTC[C/T]JAGGACTAATCTGTAGGGGT   |
| SJHQ | SJLGG034 | chr3 | 418811    | 20 | 56 | 0 | 42 | G | T | TTAATAGTTATCTCAACAAT[G/T]GTACGGGGTAAAGGTGAAG   |
| SJHQ | SJLGG034 | chr3 | 57924647  | 8  | 23 | 0 | 31 | C | T | CTGTGAAGCATGCTTAAAG[C/T]ATGATATAGGGAGCTTGAA    |
| SJHQ | SJLGG034 | chr3 | 60775417  | 25 | 59 | 0 | 40 | C | T | TATTAACACCTGACTCTGT[C/T]CCTTGAATAACAGACATTTT   |
| SJHQ | SJLGG034 | chr3 | 7360289   | 19 | 42 | 0 | 44 | G | A | TTAACAAAAATCAGATGC[G/A]GTTAATCTCTTTTCATTTGG    |
| SJHQ | SJLGG034 | chr3 | 77825885  | 21 | 48 | 0 | 38 | G | C | CTTCTTTTTTAATAGTTT[G/C]GJAGAAGCACTAAATCTCAG    |
| SJHQ | SJLGG034 | chr3 | 84680773  | 28 | 61 | 0 | 40 | G | A | GTGCTAGTGTGACTGAG[G/A]CAGTTCTTCCACTAATACAC     |
| SJHQ | SJLGG034 | chr3 | 85002606  | 10 | 38 | 0 | 45 | A | T | TGCTTGTGGCTGAAAAAGT[C/A]TJGGAACAGTAAAGAAATGGTG |
| SJHQ | SJLGG034 | chr3 | 99811872  | 19 | 60 | 0 | 36 | C | T | TTTGTGGGGTTTCATAATA[C/T]GTTGAAGGAGTAGAGGTTAC   |
| SJHQ | SJLGG034 | chr4 | 101409766 | 33 | 73 | 0 | 37 | A | G | GAGCCCATATCAATACGTT[A/G]GCTAATCCCTTTTAAAGTG    |
| SJHQ | SJLGG034 | chr4 | 108678987 | 23 | 53 | 0 | 38 | T | C | TCTTTATTTACCCATAATGA[T/C]CCTGGGACTTGTCTACTTTT  |
| SJHQ | SJLGG034 | chr4 | 132932169 | 21 | 56 | 0 | 40 | A | G | TTCATACAATCAAGCATAT[A/G]AAGTGATGACAGTATCATA    |
| SJHQ | SJLGG034 | chr4 | 137388369 | 28 | 68 | 0 | 40 | G | C | ATTTGATACATAGTCCAAAC[C/G]TTTCCAAACATATATTGAA   |
| SJHQ | SJLGG034 | chr4 | 157349706 | 28 | 66 | 0 | 51 | G | T | TTAAACTTAATCCCTTAA[G/T]TATAATTTAAATGTGAGGGA    |
| SJHQ | SJLGG034 | chr4 | 175560833 | 14 | 59 | 0 | 41 | T | C | TAATGGAGTACCAGGTGTC[T/C]CCTATGGAAGTTCACTTTT    |
| SJHQ | SJLGG034 | chr4 | 186914992 | 27 | 62 | 0 | 33 | G | A | TAAGATTCAGGTAAGTCCAT[G/A]GACAGCAATAGACACACAC   |
| SJHQ | SJLGG034 | chr4 | 189785476 | 20 | 46 | 0 | 17 | G | A | CTATGCAACGTACCCCAT[C/G]ATCTTCTCCCTGTGACAGGTT   |
| SJHQ | SJLGG034 | chr4 | 34118200  | 30 | 64 | 0 | 51 | C | A | ATTATAAATTTATCTTAAAC[C/A]ATTTCTATAAGTTGAATTC   |
| SJHQ | SJLGG034 | chr4 | 55621529  | 17 | 38 | 0 | 28 | C | T | AAATGCACTGCATAGGCTG[C/T]JGGCTTACTGTGGGCATTGAA  |
| SJHQ | SJLGG034 | chr4 | 73072660  | 25 | 67 | 0 | 39 | A | T | TTACGAGCCCAAAATCCA[A/T]ATCTACTGCTCCCTAAATTT    |
| SJHQ | SJLGG034 | chr4 | 74368131  | 12 | 45 | 0 | 38 | A | G | ACATCTGCAGTTGAGAATA[A/G]TJGAGGAGTGGAGGGTAAGG   |
| SJHQ | SJLGG034 | chr4 | 77699817  | 18 | 47 | 0 | 56 | C | G | TATAAGGATAATCTGATTTT[C/G]AAAAAGTTAGCCCTCTACT   |
| SJHQ | SJLGG034 | chr5 | 106279630 | 20 | 56 | 0 | 35 | T | C | ATGAAAGCAATCTCATCTG[T/C]GAAAGTAAAGAGAGAGGT     |
| SJHQ | SJLGG034 | chr5 | 108319508 | 6  | 37 | 0 | 30 | G | A | CAGCTAAATGCACATAACCA[C/A]ATCTCTTCCAAAAATGCA    |
| SJHQ | SJLGG034 | chr5 | 113142301 | 10 | 39 | 0 | 28 | T | C | TTTTACAGGGAAGTGCAGAT[C/T]TAGCCCTCAGCTAAGGAGG   |
| SJHQ | SJLGG034 | chr5 | 135376862 | 19 | 40 | 0 | 37 | C | T | GGCTGAAAGCCGTGGCTAAC[C/T]CTGCACACCTAGAGAGTGAC  |
| SJHQ | SJLGG034 | chr5 | 148631473 | 27 | 60 | 0 | 29 | G | A | ATAGAGGATCTTGCCATGC[G/A]TTTCAGATCTCAGATCTTC    |
| SJHQ | SJLGG034 | chr5 | 157506355 | 21 | 42 | 0 | 23 | A | T | CACCTCCCATTTCTCCAT[A/T]GTTTTCTTTAGAGACCCCAAG   |
| SJHQ | SJLGG034 | chr5 | 161237044 | 25 | 63 | 0 | 47 | A | G | AGAGTCGTTCTTTTATTTT[A/G]CTTTTATCTCTCTCTTCAT    |
| SJHQ | SJLGG034 | chr5 | 161421271 | 41 | 77 | 0 | 42 | C | A | TCAAACATAATACCCTTTG[C/C]CTTTCTATTGAACCTCAGAA   |
| SJHQ | SJLGG034 | chr5 | 164025805 | 7  | 62 | 0 | 48 | T | A | GTCTACTGAGGGAAGTTTTT[A/G]TTTTTTGTTTTGTAATTC    |
| SJHQ | SJLGG034 | chr5 | 174200508 | 20 | 49 | 0 | 23 | C | T | TTTTTCAAGAAGGCATAGGT[C/T]CTATTGTGTGTCAGCTGAGCA |
| SJHQ | SJLGG034 | chr5 | 35946214  | 15 | 45 | 0 | 29 | G | C | TATCCAGCACTGAGGAAGG[A/G]CCTCCCGGGGCGAAGCTATTGG |
| SJHQ | SJLGG034 | chr5 | 54684873  | 21 | 58 | 0 | 36 | C | T | ACTGTAACATTTTAAATGA[C/T]GATTTAAATGTTTATTATATA  |
| SJHQ | SJLGG034 | chr5 | 62410240  | 27 | 67 | 0 | 35 | T | C | GAAAGATGACCTTTGTTTTT[C/A]AACTCATCTGTAACCTGTC   |
| SJHQ | SJLGG034 | chr5 | 66297598  | 19 | 69 | 0 | 38 | C | T | AACCACCTACAGGTTGTGTT[C/T]TACTCACTGATCTCTCTTCA  |
| SJHQ | SJLGG034 | chr5 | 88596959  | 26 | 74 | 0 | 45 | C | T | CCTTATAAGCAACTATACC[C/T]TCTTCTACTAATTTTCTATATG |
| SJHQ | SJLGG034 | chr5 | 91113676  | 9  | 61 | 0 | 49 | G | A | TTTTATTTCCGGCCACAAG[G/A]CCATAATGCAAAAAGAAAT    |
| SJHQ | SJLGG034 | chr5 | 93642501  | 31 | 72 | 0 | 42 | G | A | TGCAGCCCTCATTTCTTCC[G/A]TAATGTCCATGTGATTAAT    |
| SJHQ | SJLGG034 | chr6 | 125516721 | 19 | 56 | 0 | 34 | T | A | AGATCTATGAAAAAGGCAT[T/A]ACGTGAAATCTCTGATGAT    |
| SJHQ | SJLGG034 | chr6 | 129462494 | 23 | 52 | 0 | 44 | G | A | CTGCTAGGTGCCAGAAATG[C/A]GATCTTGAGCAATATACAAAG  |
| SJHQ | SJLGG034 | chr6 | 135410377 | 26 | 48 | 0 | 26 | A | G | GGAGAAAAAATAACCTGGGG[G/A]CATGGGTTCTCATTTAGAA   |
| SJHQ | SJLGG034 | chr6 | 143947936 | 25 | 45 | 0 | 32 | A | T | AGCGTGTCAATTAAGAAAG[A/T]CAGGGAAGGGTTTTAGCAAAA  |
| SJHQ | SJLGG034 | chr6 | 19001585  | 26 | 53 | 0 | 39 | G | T | TACCAGAGAAAAAATCAAG[G/T]ATCATACTATTTTCTAAGT    |
| SJHQ | SJLGG034 | chr6 | 35756080  | 19 | 49 | 0 | 32 | C | A | TTGGGCGATGAATGAAAGT[C/A]GCCAGAAAGGACCAAGCTC    |
| SJHQ | SJLGG034 | chr6 | 49373831  | 21 | 51 | 0 | 46 | A | G | ATTCTGTGCCTCAGGATGTG[A/G]CAATGCTTATAAATCCACA   |
| SJHQ | SJLGG034 | chr6 | 54783905  | 30 | 59 | 0 | 34 | A | G | ACTGAGGAAGTTAGAAACATG[A/G]AAGATATTGAATGTTGAA   |
| SJHQ | SJLGG034 | chr6 | 61977078  | 30 | 55 | 0 | 42 | C | T | GATGATCTATAATATTTTT[C/T]GAGTTCTCTATTTCTCTCC    |
| SJHQ | SJLGG034 | chr6 | 66289314  | 29 | 69 | 0 | 37 | G | A | TGAAATATATACAGAGAC[G/A]GCAAGGCTCTTTGTGATTA     |
| SJHQ | SJLGG034 | chr6 | 76498128  | 13 | 40 | 0 | 35 | C | T | ACGTTCTAGCATCATTTT[C/C]CTGAGCTCTTCTGCTCAG      |
| SJHQ | SJLGG034 | chr6 | 80803843  | 23 | 58 | 0 | 30 | T | G | ATTGATTTAGAAAAATTAAT[G/T]GCAACTTTCTTAAATATG    |
| SJHQ | SJLGG034 | chr6 | 82515201  | 27 | 61 | 0 | 48 | G | A | GATTGATATTATTTCTTTG[C/A]GAACCTCTGAGGAGGTTA     |
| SJHQ | SJLGG034 | chr6 | 82977893  | 14 | 41 | 0 | 29 | A | G | GCTCTATCTGCACGACATG[A/G]CAAGAGCAGAGGCCAAACGT   |
| SJHQ | SJLGG034 | chr6 | 84976368  | 11 | 48 | 0 | 39 | A | G | TTTTTTTTTTTAAACAAAGG[A/G]AAGAAACAATCGCATTTCTTT |
| SJHQ | SJLGG034 | chr7 | 115571219 | 22 | 59 | 0 | 42 | T | C | CTTTACGTATAATCCAATA[T/C]GCATTTAGGCTTATCTATGT   |
| SJHQ | SJLGG034 | chr7 | 132037403 | 23 | 45 | 0 | 23 | G | A | TTCACACACTATGGGGAAG[C/A]AACAACCTCCGGGCTGGTGG   |
| SJHQ | SJLGG034 | chr7 | 147792092 | 23 | 57 | 0 | 30 | G | A | TAAGAGGCAAGTGAACCAAT[G/A]AATGATGAACCGAGAGTAA   |
| SJHQ | SJLGG034 | chr7 | 23514928  | 22 | 65 | 0 | 47 | A | G | TCTTTGGTGAAGTTGTAATT[A/G]TATAAATAAATGCTGTTGG   |
| SJHQ | SJLGG034 | chr7 | 3964205   | 24 | 45 | 0 | 27 | G | A | ATTCTGTTGGTCTCGTAC[G/A]TTATCATCTGTACCAGTGA     |
| SJHQ | SJLGG034 | chr7 | 40356070  | 14 | 43 | 1 | 47 | C | T | TGAGGATAAAGGCCAGACCA[C/T]GGTTCATCTGCTTGGTCAA   |
| SJHQ | SJLGG034 | chr7 | 48695053  | 20 | 42 | 0 | 35 | C | T | ATCCCACTAATCCTAATCAC[C/T]CAGCTAATCCCTTTGAGAAG  |
| SJHQ | SJLGG034 | chr7 | 69273668  | 15 | 49 | 0 | 30 | C | T | AGCCTGTGGTATCTGACCCAG[C/T]GTCTCAGTGCATATAGCC   |
| SJHQ | SJLGG034 | chr7 | 7707062   | 27 | 63 | 0 | 28 | C | A | ACCGCATACTAGGCTTGGGG[C/A]JAGCAGGATTATACAGGTCCC |
| SJHQ | SJLGG034 | chr7 | 88698489  | 16 | 46 | 0 | 31 | T | A | GCTTTATGAAAGAGAAAAAC[T/A]TGAAGGCTACCTGTCATA    |
| SJHQ | SJLGG034 | chr8 | 100664002 | 25 | 55 | 0 | 45 | C | T | CTCAAAAAGTCATTTTCTT[C/T]TGTGTTTTGTTGGGGCTTTTT  |
| SJHQ | SJLGG034 | chr8 | 110116870 | 9  | 62 | 0 | 32 | C | T | AAAACCCCTGAAGAACAGGA[C/T]ATTTTCCCATGACTAGCAGA  |
| SJHQ | SJLGG034 | chr8 | 12959057  | 20 | 54 | 0 | 34 | A | G | TCTCTAGACACTAAAAATG[T/A]GTAAGTCTCCCACTGGAGTA   |
| SJHQ | SJLGG034 | chr8 | 134045763 | 17 | 39 | 0 | 27 | T | C | CAAGTCTGCATCCTCAGGGT[C/G]AAGCTCCTGACCTCAGGAAT  |
| SJHQ | SJLGG034 | chr8 | 138667185 | 23 | 54 | 0 | 24 | G | A | TATGAAAAAGGTGTTGTAAG[G/A]GATGATACAATATAAGAG    |
| SJHQ | SJLGG034 | chr8 | 140767348 | 5  | 22 | 0 | 23 | G | T | AGAGGTCGTTGTAATTTGGGG[G/T]AGCCATGAGCTCCGAGCTC  |
| SJHQ | SJLGG034 | chr8 | 145584998 | 20 | 42 | 0 | 37 | C | T | TCCCTGAACACTAGACCATGG[C/T]CTGGCCTGTTAACAGGCTG  |

|      |          |       |           |    |    |   |    |   |   |                                                |
|------|----------|-------|-----------|----|----|---|----|---|---|------------------------------------------------|
| SJHQ | SJLGG034 | chr8  | 32768057  | 24 | 66 | 0 | 45 | T | A | CATCTATTTAATAAGTTCCTT[T/A]AAGGTGACGAATATATAAT  |
| SJHQ | SJLGG034 | chr8  | 3844931   | 22 | 44 | 0 | 38 | G | T | TAACGACTAATGGATACAGG[G/T]GTTGTCTGTCCGGTTCCTG   |
| SJHQ | SJLGG034 | chr8  | 40869078  | 26 | 61 | 0 | 32 | T | C | TTTTCAGATATTCAGATATA[T/C]ATCTCATATGTATATTTCT   |
| SJHQ | SJLGG034 | chr8  | 5777770   | 32 | 76 | 0 | 35 | G | A | TCACCTGGGCACTAGCCCG[G/A]TCTACTTTTGCTGAGTATT    |
| SJHQ | SJLGG034 | chr8  | 61292204  | 21 | 44 | 0 | 38 | C | T | TTGTTAACTATTTGGCAGA[C/T]GGGAATGTTCTTTGGTGAC    |
| SJHQ | SJLGG034 | chr9  | 104866271 | 13 | 53 | 0 | 34 | C | T | TTAACAAAGCACCCCTCA[C/T]GTATACACTTAATTTAAAAA    |
| SJHQ | SJLGG034 | chr9  | 1687870   | 24 | 62 | 0 | 30 | A | G | TGGCTTTGACACTTCACTAC[A/G]TCTGTATTTCCCACTGCTTG  |
| SJHQ | SJLGG034 | chr9  | 24220675  | 22 | 47 | 0 | 27 | C | A | CATGGCTCCTGCCGTAGT[A/C]ATCATGGCTCTAATGACTGAA   |
| SJHQ | SJLGG034 | chr9  | 25814872  | 16 | 47 | 0 | 35 | G | A | GCCTGAACAAATAATAATC[G/A]CAAGACAGAATTCGACCTT    |
| SJHQ | SJLGG034 | chr9  | 84313777  | 15 | 53 | 0 | 45 | G | A | GCTCATGCAGAATCATAAGG[G/A]CATGTATTCATGATGTGCTA  |
| SJHQ | SJLGG034 | chr9  | 92242817  | 22 | 51 | 0 | 26 | T | G | GTCACCTGAATATGGGCTA[T/G]TCTGAGAACACCCAGTGGGA   |
| SJHQ | SJLGG034 | chrX  | 130171425 | 19 | 22 | 0 | 16 | G | A | CATATAATACCAGTCTT[C/G/A]TTTTTCATGCATTTAGCCTC   |
| SJHQ | SJLGG034 | chrX  | 65523423  | 18 | 22 | 0 | 19 | G | T | CTGAGCAACAGAAAATCTT[G/T]GGGTAATTTCCCTAAGGA     |
| SJHQ | SJLGG034 | chrY  | 18835347  | 19 | 29 | 0 | 31 | T | A | TAATCAGCACTTTGGTCAAC[T/A]CAGAACTCAACAGAATAA    |
| SJHQ | SJLGG034 | chrY  | 18926409  | 21 | 25 | 0 | 24 | T | C | CCTTTGAGCAAGCTTATTTG[T/C]GCCACATCCAATTATACCTT  |
| SJHQ | SJLGG034 | chrY  | 18958667  | 31 | 36 | 0 | 23 | A | G | ACTGTAATCAGAGCCTTCA[A/G]ATCCAGTTCACAATATGT     |
| SJHQ | SJLGG035 | chr10 | 126355625 | 10 | 26 | 0 | 22 | G | A | CCCCCACACTCTTATACC[G/A]TACCCCAAGCCCACTCAG      |
| SJHQ | SJLGG035 | chr10 | 135070947 | 16 | 53 | 0 | 27 | C | T | CCTCATCTCGAGTTTCTCT[C/T]CCGAGTCTGGAATCTAAA     |
| SJHQ | SJLGG035 | chr12 | 111141812 | 16 | 41 | 0 | 27 | T | C | TTTTTCTCTTTTTAAAATG[T/C]ATTGTTCTCTTATTAATAA    |
| SJHQ | SJLGG035 | chr12 | 7059502   | 12 | 45 | 0 | 25 | T | G | TGTATCCCCTGTTGAGCTG[C/T]GTTTCTCGTTTGGTTGGC     |
| SJHQ | SJLGG035 | chr14 | 87176938  | 15 | 55 | 0 | 42 | T | C | CATTCCGAAAACAGAGCAT[T/C]TGGGATAGCATCAGTCAGA    |
| SJHQ | SJLGG035 | chr16 | 26201280  | 11 | 41 | 0 | 29 | G | A | CCCCCATGGCCCTGCCCT[G/A]GTAAGACCATCTGACGTCC     |
| SJHQ | SJLGG035 | chr16 | 74720491  | 18 | 51 | 0 | 33 | C | A | ACTACGTCTCCACACAGCA[C/A]AAAAAAGATATTTAATAAG    |
| SJHQ | SJLGG035 | chr17 | 72801377  | 16 | 42 | 0 | 14 | G | A | GCAGCTGTCAAGGGCTTCC[C/G/A]TGCCTGCCTTTTGCAGGGAA |
| SJHQ | SJLGG035 | chr19 | 9318397   | 17 | 44 | 0 | 30 | C | T | TTGTCTTCTGTTCCCTT[C/G/A]TGCCTTCTTACTCAGCTCT    |
| SJHQ | SJLGG035 | chr2  | 134337633 | 11 | 42 | 0 | 31 | A | C | ACCAGTGGCCCTCATTAGC[A/C]ATCATCAAAAGGTACAGC     |
| SJHQ | SJLGG035 | chr2  | 41562399  | 16 | 57 | 0 | 34 | C | T | ACAAAATATGGGGAAGCA[C/T]GCTGTGAACACAGAAAATAG    |
| SJHQ | SJLGG035 | chr3  | 18573979  | 12 | 54 | 0 | 34 | C | T | GTGATTTCTGTTCTGGGCA[C/T]AAAAACAGTAACAGTGT      |
| SJHQ | SJLGG035 | chr3  | 27531481  | 16 | 26 | 0 | 26 | G | A | CCGGGAGTATACCAGCCTAG[G/A]TATTTTGTGTCTCCACTGA   |
| SJHQ | SJLGG035 | chr4  | 75217404  | 7  | 57 | 0 | 39 | G | T | CATTCTGACGAAGTATAA[G/T]TCTAATTTTCTTTTCGACTA    |
| SJHQ | SJLGG035 | chr5  | 21048860  | 10 | 76 | 0 | 42 | A | G | TGCATTTATAATCCTCTTA[A/G]GATCAITTAATTTCTTTCTT   |
| SJHQ | SJLGG035 | chr6  | 147961143 | 16 | 37 | 0 | 34 | C | T | GAATGTTGAGCTGCCGTC[C/T]JACACATTATGGCTAAAAAGC   |
| SJHQ | SJLGG035 | chr7  | 40942299  | 20 | 63 | 0 | 39 | T | A | ATAATGTTAAAATCTTAATA[T/A]AAATGAATCATATTTTCAA   |
| SJHQ | SJLGG035 | chr7  | 53427495  | 6  | 37 | 0 | 30 | G | A | ATTCACAGGGCTGTGTTCTC[G/A]JAGGTTCTGCAGGATGAGTCC |
| SJHQ | SJLGG035 | chr8  | 142630783 | 10 | 37 | 0 | 20 | G | A | TGGGGCTCACTCCAGGAAC[T/G/A]TTTTCTCTGTTGGGAGTGA  |
| SJHQ | SJLGG035 | chrX  | 122360131 | 23 | 66 | 0 | 55 | A | G | GAGGATATGGGTTTACTAA[A/G]ACTCCACTACCCACATAAAA   |
| SJHQ | SJLGG035 | chrX  | 129802776 | 17 | 56 | 0 | 44 | G | C | CACCTTATTACTAGATATA[G/C]ACTTTATGTTGATGCTCAGT   |
| SJHQ | SJLGG037 | chr1  | 101641318 | 23 | 85 | 0 | 49 | C | A | AGTTCGATTTTTGTAATTTT[C/A]ATTTCAATGAGCATGAAAAC  |
| SJHQ | SJLGG037 | chr12 | 75554929  | 13 | 80 | 0 | 44 | C | T | TTAATGGAGTTAGATAT[C/T]TAAATAAAAACTCAGGAGT      |
| SJHQ | SJLGG037 | chr15 | 58756362  | 6  | 57 | 0 | 42 | C | T | TGTCACCCCTCCCAACCCCT[C/T]TATACTTGGCCCTTCTATC   |
| SJHQ | SJLGG037 | chr15 | 98507333  | 10 | 53 | 0 | 45 | C | T | TGTGTCACCTTTTTATCCCC[C/T]TGTGATTTAACACATTA     |
| SJHQ | SJLGG037 | chr16 | 4066623   | 8  | 79 | 0 | 42 | T | A | GAGAAAGGAAAACATAAATTT[A/A]AAATCTGAGACTAGGTAGC  |
| SJHQ | SJLGG037 | chr16 | 87716836  | 7  | 36 | 0 | 28 | C | T | ACAGCACAGCGGGCCGGCAC[C/T]GCCGGGTGGGTTGTCTGGG   |
| SJHQ | SJLGG037 | chr21 | 21026714  | 11 | 66 | 0 | 31 | T | A | GGCTTTGAAGCAAAAGTAA[T/A]TATCTCACAGCTTCTCTCT    |
| SJHQ | SJLGG037 | chr2  | 125673992 | 12 | 93 | 0 | 43 | T | C | AAAGGCTATATAAATCAGCC[T/C]TTTGGCTTGGCTATATATCC  |
| SJHQ | SJLGG037 | chr2  | 12865775  | 15 | 46 | 0 | 34 | C | T | GAAGTTACGTTTGACTTTC[C/G/A]GAAAGAGCATGCCCTGTCC  |
| SJHQ | SJLGG037 | chr21 | 29236729  | 8  | 58 | 0 | 40 | C | A | TGCACAAGCTTTTCTTGC[C/A]AATCTCTTTGTCCACAAC      |
| SJHQ | SJLGG037 | chr2  | 189368800 | 7  | 63 | 0 | 40 | C | T | TTGAGTACTACAGATAT[C/T]AAAGTAAATGTAAGTAAATGA    |
| SJHQ | SJLGG037 | chr2  | 89101618  | 11 | 53 | 0 | 40 | G | A | TAGCTATCTGTATTATTA[G/A]TTTACACTGGATCCCCGTT     |
| SJHQ | SJLGG037 | chr3  | 14405386  | 11 | 43 | 0 | 28 | G | A | GAACCTCTAAACCTTGC[C/G/A]TCAAGGATGGAGTGACCAT    |
| SJHQ | SJLGG037 | chr3  | 166362074 | 22 | 68 | 0 | 41 | A | C | TCAATTAGTAAATCCATGCT[A/C]ATGTGGATACTAAGTTGTTT  |
| SJHQ | SJLGG037 | chr3  | 88038496  | 8  | 56 | 0 | 40 | C | A | TGAGTGCCATTAGGGCTG[C/A]CTTACTAGTAAGTTCTTTG     |
| SJHQ | SJLGG037 | chr5  | 162111858 | 8  | 66 | 0 | 56 | G | A | CCAGTGGTAATGAGAAATCC[G/A]TCCAGAGAAATGACAGAGT   |
| SJHQ | SJLGG037 | chr6  | 6057115   | 10 | 55 | 0 | 40 | G | A | ACTGACATTTTAGTGCTAC[G/A]CGGAGAGGACTCTTACAGTG   |
| SJHQ | SJLGG037 | chr8  | 106185813 | 22 | 68 | 0 | 52 | T | C | AATCAGAATTTTAAATTC[T/C]ATATATTTATGTAGGTTTTT    |
| SJHQ | SJLGG037 | chr8  | 2610004   | 8  | 69 | 0 | 49 | A | G | ATTAAGTCTTTACATATGT[G/A]GCATATAACATGTGAAATTT   |
| SJHQ | SJLGG037 | chr8  | 85047552  | 7  | 68 | 0 | 59 | T | C | ATCAATTAGTCAATCAACAA[T/C]AATATTTAGTAGTATCTTAT  |
| SJHQ | SJLGG037 | chr9  | 113460856 | 8  | 72 | 0 | 50 | T | A | GATTATTTTATTTCTTGA[T/A]JGACATCTCTGTACACGCTT    |
| SJHQ | SJLGG037 | chr9  | 75436917  | 20 | 71 | 0 | 37 | G | A | TATCATTCAAGTCAGGAAT[C/G/A]GAGATCAACAGGCTCCTTG  |
| SJHQ | SJLGG038 | chr10 | 133580610 | 11 | 41 | 0 | 34 | C | T | TGATGTGGAGGACAGGGCTG[C/T]GGCCGCTGGCCACTGCTG    |
| SJHQ | SJLGG038 | chr10 | 61803919  | 12 | 57 | 0 | 37 | G | T | AAGTAAGGTGAAAAGTAGA[G/T]ATTTTCTGTTTLAGGAGAT    |
| SJHQ | SJLGG038 | chr10 | 8242224   | 12 | 36 | 0 | 40 | T | G | CTCATAATTACAGAACTATG[T/G]GGTAAGGACTGCAGTGAATA  |
| SJHQ | SJLGG038 | chr11 | 128578045 | 9  | 67 | 0 | 47 | C | T | TGCCCTGGTTTCCCATTG[C/T]GTGATGGGGGAGGAAGCTT     |
| SJHQ | SJLGG038 | chr11 | 60849244  | 9  | 44 | 0 | 28 | C | T | CAGCCCTGTCCCAGCATG[C/T]JAGCCTCCCTTTGGGATCC     |
| SJHQ | SJLGG038 | chr1  | 196201128 | 10 | 55 | 0 | 49 | G | A | ACTAATAAAAAGTGAGAAC[G/A]CTAAATAAAGTTGCACTTTT   |
| SJHQ | SJLGG038 | chr1  | 196676908 | 15 | 70 | 0 | 53 | A | T | AGATAAGTAACTTTAATGAA[A/T]TAGACAAAAACATATGTCTT  |
| SJHQ | SJLGG038 | chr12 | 131028515 | 12 | 67 | 0 | 44 | C | G | TAGGATTGTACCCGTTTAA[C/G]CTGTTTGTGTTTCCATGTC    |
| SJHQ | SJLGG038 | chr12 | 71398505  | 10 | 49 | 0 | 34 | G | A | CACACCTGCCCAATCTCTC[G/A]TCCCACTTGTATTCACTCT    |
| SJHQ | SJLGG038 | chr12 | 99435150  | 9  | 72 | 0 | 44 | A | G | AGACAGATACTTTGCAATTT[A/G]ATTTCTAAAATAGCTGAGT   |
| SJHQ | SJLGG038 | chr13 | 86644145  | 25 | 87 | 0 | 43 | G | A | TTTGAAAATAAGGAAAAGT[A/G]AATTTATCTTTCATGAATGCC  |
| SJHQ | SJLGG038 | chr14 | 89966112  | 18 | 64 | 0 | 32 | C | A | TCTAGTCAGACTAAAGTGTG[C/A]AAACTGCTTCTCACATGTTT  |
| SJHQ | SJLGG038 | chr17 | 26630144  | 20 | 76 | 0 | 47 | C | T | ATACATATATTTATGATTT[C/T]JGGAAGTAAATTTTCAATGA   |
| SJHQ | SJLGG038 | chr17 | 51547546  | 14 | 57 | 0 | 42 | C | T | CTAACCTTGATAGTGCCTT[C/T]TCCCTTATGTTATGCTG      |
| SJHQ | SJLGG038 | chr19 | 4695797   | 9  | 33 | 0 | 37 | C | T | ATTTTCATGATCAAGTGT[C/T]JGAAAACAAATGGCCCTAAGTCT |

|      |          |       |           |    |    |   |    |   |   |                                                |
|------|----------|-------|-----------|----|----|---|----|---|---|------------------------------------------------|
| SJHQ | SJLGG038 | chr20 | 14511379  | 15 | 58 | 0 | 41 | C | T | TTCCAAGATGATTAAGAGCG[C/T]GGAAAAATAATTTATCTTAA  |
| SJHQ | SJLGG038 | chr20 | 34102329  | 6  | 23 | 0 | 19 | C | T | TTCCGGGAGTGCTGAGGT[C/G]TGGGGGTGCTGCCCTGTTTC    |
| SJHQ | SJLGG038 | chr21 | 29699110  | 14 | 60 | 0 | 49 | G | A | AGCTGCTCACTTAACTCTG[G/A]ATGTTGCTAGTAAAAAAG     |
| SJHQ | SJLGG038 | chr2  | 156029748 | 20 | 55 | 0 | 35 | G | T | AAAATCTAACTAGAGGT[G/G]AATAAAGAGAACAGATTTTC     |
| SJHQ | SJLGG038 | chr2  | 168243208 | 13 | 66 | 0 | 37 | T | G | TACAGTATCAGTGTCTGACA[T/G]GCAAAITCAGCTTCCAGTC   |
| SJHQ | SJLGG038 | chr2  | 18646851  | 16 | 70 | 0 | 49 | A | G | CTAAATGGCTTGAAGCCTAA[G/T]ACGACTTTTTCTCTAAGCG   |
| SJHQ | SJLGG038 | chr2  | 193537207 | 16 | 60 | 0 | 36 | C | A | ACGGGGCTCTTGATGACCA[C/A]GAGCTTCCCTTGGTTCCTTG   |
| SJHQ | SJLGG038 | chr2  | 226322081 | 18 | 69 | 0 | 45 | G | T | TTACCTTCATTGAAGGGCA[G/T]ATTTCCACAGCCCTCAATG    |
| SJHQ | SJLGG038 | chr22 | 29598485  | 12 | 43 | 0 | 27 | C | T | AGGGGAAGGAGGCTGCCGCC[C/T]AGGTTGTTGTTAAGAGGAT   |
| SJHQ | SJLGG038 | chr2  | 241838980 | 11 | 41 | 0 | 23 | G | A | TGGTGTGGCTGAGCAAGT[C/G]ATGCCCGCTGGGCTCCAG      |
| SJHQ | SJLGG038 | chr3  | 1069798   | 12 | 57 | 0 | 46 | C | T | AAACTTCTTCTGAAATATT[C/T]GGAAGAAAAATAAAGATAT    |
| SJHQ | SJLGG038 | chr3  | 122385311 | 14 | 60 | 0 | 30 | G | A | TTTGGGGTAAGAAATGGGG[G/A]TAGTATTTCTAGAGTAGAAG   |
| SJHQ | SJLGG038 | chr3  | 165359624 | 19 | 59 | 0 | 34 | G | A | CTGGCCAAAATGAATTT[C/G]ATTTCTGTATTGCTATGTTTT    |
| SJHQ | SJLGG038 | chr3  | 33987339  | 17 | 63 | 0 | 44 | C | T | CATCATGCCAAAAACCCCC[C/G]ATGACTGCCACTGATGGA     |
| SJHQ | SJLGG038 | chr3  | 80674377  | 8  | 50 | 0 | 42 | A | T | CACACTTCCCATAGACAT[G/A]TGTACCTGGACAAGAAAAGAC   |
| SJHQ | SJLGG038 | chr4  | 11687404  | 11 | 51 | 0 | 36 | C | G | TGCTTGCACATGTTCCAG[C/G]TCCCTCTTTGTGTGATGT      |
| SJHQ | SJLGG038 | chr4  | 132293921 | 9  | 71 | 0 | 38 | A | G | GTATTTGGCAATAATAGGAG[A/G]TTGAGCTTCAATGTGAATT   |
| SJHQ | SJLGG038 | chr4  | 135202394 | 21 | 67 | 0 | 43 | C | T | TAGCAAAAATCTTAAATGA[C/T]GAGAAATATTTTCTCAGCT    |
| SJHQ | SJLGG038 | chr4  | 136164317 | 15 | 71 | 0 | 48 | G | T | CAACAACCTTCTCAATTTT[G/T]CTTTATTTTATGCTCATCAT   |
| SJHQ | SJLGG038 | chr4  | 43759564  | 19 | 62 | 0 | 50 | G | A | AAATCAGGTATATATCTT[C/G]ATTTGACTTCTAGGTAAGA     |
| SJHQ | SJLGG038 | chr4  | 64218230  | 19 | 74 | 0 | 42 | C | A | CTGCTTTCATGGTATCTT[C/A]ATCAACAATCCAAATACACTG   |
| SJHQ | SJLGG038 | chr4  | 90657364  | 13 | 70 | 0 | 33 | C | T | CATGATAAAATACACTTAA[C/T]GAACCAACCTCTTTTCCA     |
| SJHQ | SJLGG038 | chr5  | 165547892 | 12 | 49 | 0 | 48 | G | A | CAACATCCCAATGGCTAC[G/T]GCTCCCTCTGTGATGCACT     |
| SJHQ | SJLGG038 | chr5  | 179567231 | 10 | 45 | 0 | 26 | G | A | CCACAGGGATGCCAGAGAG[G/A]GGCTGGGCTGCCAGTGGTCC   |
| SJHQ | SJLGG038 | chr5  | 4425514   | 17 | 64 | 0 | 32 | G | A | AGAGAAATGGATGTTAAC[C/G]CAGAAATAATATATACCTT     |
| SJHQ | SJLGG038 | chr5  | 84111188  | 19 | 69 | 0 | 43 | T | G | TGTGATATGCTTGTGAGAA[C/T]TTTAACTCAAATTTTTAT     |
| SJHQ | SJLGG038 | chr6  | 103179966 | 23 | 86 | 0 | 41 | T | G | AAATATTTTGTGACTTGT[G/T]GCTTACAGAAATACATAGAG    |
| SJHQ | SJLGG038 | chr6  | 107707548 | 7  | 45 | 0 | 48 | G | C | AAGTAACCTCATGTTTATTA[G/C]ATGTAATAGTTTTACATTG   |
| SJHQ | SJLGG038 | chr6  | 122327469 | 20 | 68 | 0 | 45 | C | T | AAGTAGGGTGCAAGATATT[C/T]GTTAAGAAGAAAATAAGAGG   |
| SJHQ | SJLGG038 | chr6  | 132966005 | 13 | 58 | 0 | 42 | C | T | AATTTAACTCACCATACATA[C/T]TTTACTCAAGTAAGTATT    |
| SJHQ | SJLGG038 | chr6  | 72271025  | 20 | 65 | 0 | 41 | C | T | ACTTCCATTTACAATGTATA[C/T]GAAATATAAGAAAGGTAGCA  |
| SJHQ | SJLGG038 | chr7  | 156219508 | 11 | 59 | 0 | 39 | C | T | CTGCCTGTTTCAGGCTGTTA[C/T]GTTTTAATGATGATATTT    |
| SJHQ | SJLGG038 | chr7  | 43338444  | 14 | 48 | 0 | 34 | G | A | GTCTGCCGCCCCACATCT[C/G]JAGGCTCCTTTCACAGCTCTT   |
| SJHQ | SJLGG038 | chr7  | 56850970  | 9  | 41 | 0 | 30 | A | T | CAGCAATAAACTACATTA[A/T]CAATATTTCAATATATACAC    |
| SJHQ | SJLGG038 | chr8  | 110374245 | 14 | 48 | 0 | 37 | C | T | GCCCTAAGTCTACTGATT[G/C]TAATAAGAGAGCACAAT       |
| SJHQ | SJLGG038 | chr8  | 138463732 | 19 | 52 | 0 | 42 | G | A | TCAGGGTATCTGGCTCATAA[G/A]TTTAAACAAATAGCTATCATT |
| SJHQ | SJLGG038 | chr9  | 125135459 | 8  | 30 | 0 | 24 | G | A | GTAATGTGGAGCAGGAGGCT[G/A]AGTGGATGCGTAATGTGG    |
| SJHQ | SJLGG038 | chr9  | 21748890  | 15 | 48 | 0 | 34 | G | A | ACATTTAGGTATTAATAA[G/A]AACCTATGTTGGCCCTTTT     |
| SJHQ | SJLGG038 | chr9  | 78650939  | 16 | 61 | 0 | 35 | G | A | AGTACCAGAAAGAGCATGCT[G/A]AAAAATAAATAAAACCTC    |
| SJHQ | SJLGG038 | chr9  | 78652700  | 18 | 57 | 0 | 35 | G | T | CGTACGTGGGGAATTTGGT[G/T]AATTTTCTGCTATACAAC     |
| SJHQ | SJLGG038 | chr9  | 78654436  | 20 | 75 | 0 | 48 | G | A | GAAAAATGTGATGAGGAAG[G/A]GAGGCCCAAGTAAGTCTAG    |
| SJHQ | SJLGG038 | chrX  | 132404386 | 17 | 51 | 0 | 33 | G | T | ACAGGGCTTTAGCACTGGAT[G/T]CTTATGAACGTAGTGCCTGC  |
| SJHQ | SJLGG038 | chrX  | 33655031  | 16 | 60 | 0 | 30 | T | G | AGCAACTATTTTATGAGGCG[T/G]CAATTTTATATCGACTCA    |
| SJHQ | SJLGG038 | chrX  | 73968012  | 26 | 70 | 0 | 44 | T | A | ATGTATAATTAATTAACCTA[T/A]AAGTTTGGTGTGATAGAGT   |
| SJHQ | SJLGG039 | chr1  | 119495660 | 9  | 49 | 0 | 33 | C | T | ATGTTTTTAAATGTATAAA[C/T]CCAATACTGACATTTTCCA    |
| SJHQ | SJLGG039 | chr1  | 151656648 | 13 | 72 | 0 | 43 | A | G | CTGCAGTTGCTTAAACATT[A/G]TGCTCCGTAGTGTCTTGGT    |
| SJHQ | SJLGG039 | chr12 | 6899842   | 10 | 68 | 0 | 32 | C | T | CTGTGCCATCTCAGCCTTT[C/T]GCCCTCAGACCTTTCCAGCC   |
| SJHQ | SJLGG039 | chr4  | 10318600  | 9  | 56 | 0 | 37 | G | A | ATCTTTTTGTACTGCAGAC[G/A]TGACCTTGGCTGTGAGGC     |
| SJHQ | SJLGG039 | chr4  | 104427776 | 8  | 70 | 0 | 35 | T | C | TTTGACAATATAAACATT[T/C]TTATTTTATGTTGCATACTA    |
| SJHQ | SJLGG039 | chr4  | 11223914  | 6  | 58 | 0 | 44 | G | A | GGATCTGAGAATGTGACT[C/G]ATTTGATTTGGAAGGACAATG   |
| SJHQ | SJLGG039 | chr5  | 5107350   | 11 | 51 | 0 | 46 | G | A | GTTTGTCTCCAAACCTGGA[G/A]AGTCAAGCACTCACTTTAT    |
| SJHQ | SJLGG039 | chr5  | 62731609  | 6  | 55 | 0 | 47 | C | T | AATGCAGTTGAATCAAGT[C/T]GAAAGAAATTTCAGGAAGT     |
| SJHQ | SJLGG039 | chrX  | 100805662 | 4  | 28 | 0 | 31 | G | A | AGTTTTGTGTGGATGGG[G/A]TTGCCAGGGGATCCCTGCCG     |
| SJHQ | SJLGG039 | chrX  | 30426660  | 5  | 39 | 0 | 40 | A | G | ATAGAGAGAGAAAGAAAG[A/G]AAGAGAAAGATGATTAC       |
| SJHQ | SJLGG039 | chrX  | 32287709  | 8  | 59 | 0 | 39 | G | A | AGGAGAGAGAGTATTCAAC[G/A]AATATTATATACCGACTAT    |
| SJHQ | SJLGG040 | chr10 | 44563720  | 25 | 58 | 0 | 27 | G | A | CAAAACCAGGATGCCTAA[G/A]TTTCTGGCTCTGTGGGGCCT    |
| SJHQ | SJLGG040 | chr1  | 105830315 | 15 | 61 | 0 | 28 | G | A | TAGTCAGAACAGGGTGTTC[G/A]TGCCCTCCACCATGGTTTG    |
| SJHQ | SJLGG040 | chr11 | 88686144  | 6  | 59 | 0 | 51 | C | T | TGGATAATGGAGATTTC[C/T]CTCTCTTTTCAAACCTTTCT     |
| SJHQ | SJLGG040 | chr1  | 192503596 | 11 | 83 | 0 | 51 | G | A | TAAATGTAAGAAATATCC[G/A]TCTATAAATCTATGATATC     |
| SJHQ | SJLGG040 | chr1  | 197739180 | 34 | 87 | 0 | 47 | G | A | TATTATAGTACTGATTATA[G/A]TTATTACTTGTAGATCCTA    |
| SJHQ | SJLGG040 | chr12 | 126893017 | 18 | 56 | 0 | 49 | C | T | TGTACCAGCATCTTCCGGA[C/T]GAGCAGGAAGTCCACAAAATG  |
| SJHQ | SJLGG040 | chr12 | 130658850 | 30 | 74 | 0 | 40 | C | T | ATGCTCTTAGCATGACAT[C/T]AAAGCTAAAGCCATTTTTTA    |
| SJHQ | SJLGG040 | chr1  | 238524421 | 6  | 56 | 0 | 47 | A | G | ATATAGACACTCTCATTAT[A/G]TGTGTGATATATATATATA    |
| SJHQ | SJLGG040 | chr12 | 83967852  | 14 | 51 | 0 | 37 | G | A | GAACGTGGTAAGGAGGTCAA[G/A]ATTATTTCAATGGGTTCTA   |
| SJHQ | SJLGG040 | chr13 | 77082735  | 22 | 77 | 0 | 39 | C | T | TTGCTTAAATAAGTATT[T/C]TGTAAAGACTGTTCTGAATGGT   |
| SJHQ | SJLGG040 | chr15 | 32081437  | 26 | 57 | 0 | 30 | C | T | TTCTCATGAGGGTAGAAA[C/T]CAGGAGAACTGCTGGGCCT     |
| SJHQ | SJLGG040 | chr15 | 92915958  | 14 | 47 | 0 | 33 | C | T | CTCTGCAAAGGTAGCCCTT[C/T]GTTTGGATCTTACTTACCTC   |
| SJHQ | SJLGG040 | chr16 | 56360687  | 17 | 38 | 0 | 33 | G | A | CAGAGGCAGGAGGGCGGCC[C/G]AGGGCAGCACCTGCTGTGCTC  |
| SJHQ | SJLGG040 | chr1  | 70312130  | 14 | 64 | 0 | 38 | A | T | CTGATGATTAGTTTACCAA[A/T]GATAAAAACCTGCTCGAGTA   |
| SJHQ | SJLGG040 | chr20 | 49975230  | 20 | 53 | 0 | 36 | G | A | GTTCTAGAAAAGGAAGATGC[G/A]GAGGAAAGGCCATGGCAGT   |
| SJHQ | SJLGG040 | chr2  | 242153017 | 18 | 43 | 0 | 46 | C | T | GCCCTCAAACCTGTTCCCA[C/T]GCACAGCCCTCCTGGGTGA    |
| SJHQ | SJLGG040 | chr2  | 34582155  | 25 | 60 | 0 | 38 | G | C | GGTAGCAGCTATCACC[A/G]CJATCAACCTGCTTTGGTCAT     |
| SJHQ | SJLGG040 | chr2  | 37996416  | 11 | 74 | 0 | 51 | A | G | GAAACAGCCATTTGTTTT[A/G]AAGATCTGGTCATTGACAG     |
| SJHQ | SJLGG040 | chr3  | 102950785 | 20 | 65 | 0 | 47 | A | T | TCACATTTGAGCTGTTAAC[A/T]TTTGGGGCCAGTTAAACTAT   |

|      |          |       |           |    |    |   |    |   |   |                                                |
|------|----------|-------|-----------|----|----|---|----|---|---|------------------------------------------------|
| SJHQ | SJLGG040 | chr3  | 145619521 | 25 | 62 | 0 | 44 | T | C | GATCTGAAACGAGTTTGCAT[T/C]CTAAAACCAAACCTGAATCTG |
| SJHQ | SJLGG040 | chr3  | 175768035 | 19 | 71 | 0 | 33 | T | C | ACAAACATGGGGAGGAGTTA[T/C]TGATATAGTACAAAGTCTG   |
| SJHQ | SJLGG040 | chr3  | 94868255  | 27 | 93 | 0 | 37 | T | C | AAATAGTCATAAAGGACTTG[T/C]GAAGAGCAATAAATCAAACA  |
| SJHQ | SJLGG040 | chr4  | 168514790 | 16 | 72 | 0 | 47 | G | T | GTTTAAAAATTTGCAGAGAG[G/T]GGTATCATGTCTGAATGCAT  |
| SJHQ | SJLGG040 | chr4  | 179087123 | 16 | 67 | 0 | 45 | C | T | ATTATGCAGGGTCAGGAAAA[C/T]GTTAAAAACGTTGAACACCT  |
| SJHQ | SJLGG040 | chr4  | 64650230  | 7  | 69 | 0 | 54 | A | T | CTTTTATCTGAAAAAA[A/T]GATTCACAACTATTTTAAAT      |
| SJHQ | SJLGG040 | chr4  | 68933455  | 7  | 55 | 0 | 40 | G | C | ATAATCACCTTAGTATCTT[G/C]AACCATCTGGGATGTTACCC   |
| SJHQ | SJLGG040 | chr4  | 70095803  | 41 | 98 | 0 | 52 | A | T | ACATGATATCATAGTTA[T/J]TTTCTATATTTACTTTAAAA     |
| SJHQ | SJLGG040 | chr4  | 74174126  | 26 | 70 | 0 | 52 | G | C | ACTGAGTCAGTTTAGTGCTA[G/C]CTGCACCTCCCTCTAGAGT   |
| SJHQ | SJLGG040 | chr4  | 97583115  | 34 | 91 | 0 | 61 | C | T | ACCCCAAATAAAGGTA[G/C]TGTAACTATGAGAGAGAAAA      |
| SJHQ | SJLGG040 | chr5  | 104517311 | 21 | 67 | 0 | 57 | A | T | GCTAAGTATACATCCTGAAA[A/T]TAAAAAAAATGTTAAAGT    |
| SJHQ | SJLGG040 | chr5  | 117747223 | 7  | 63 | 0 | 48 | A | C | ACTTTAATCTGCTACCCCCC[A/C]AAAAAGAAAAATAGACCA    |
| SJHQ | SJLGG040 | chr5  | 119815799 | 16 | 67 | 0 | 43 | C | A | ATTGTATGCCCTTGGGGAAA[C/A]TAACATTTGTTAAATACAG   |
| SJHQ | SJLGG040 | chr5  | 25683735  | 12 | 44 | 0 | 31 | C | A | GCCTCCCTTAGGAAAAACATG[C/A]CACATTTCAATCGCTGGAA  |
| SJHQ | SJLGG040 | chr6  | 108072126 | 23 | 56 | 0 | 49 | C | T | CTCATCTATATCTTCACTTT[C/T]GTCTGGATTTTTAGGATAG   |
| SJHQ | SJLGG040 | chr6  | 146313258 | 25 | 72 | 0 | 46 | C | T | AGCCGTCTCCCTGAAAAA[C/T]GTGTATCTTTGACTAACTC     |
| SJHQ | SJLGG040 | chr6  | 154941774 | 14 | 73 | 0 | 61 | T | C | TTATTCAATAACTGTTCA[T/C]ACCCCTACTTCAAGTAATCT    |
| SJHQ | SJLGG040 | chr6  | 42335005  | 9  | 46 | 0 | 35 | G | C | ACTCTTAACACAGAAACAA[G/C]CACAGAGGCCACAGAGCATT   |
| SJHQ | SJLGG040 | chr7  | 23810158  | 24 | 79 | 0 | 44 | T | G | ATTTAGCATATTAGTATCCCT[G/G]GATTTCCATTAATGCTCTTA |
| SJHQ | SJLGG040 | chr7  | 81497723  | 16 | 73 | 0 | 47 | C | T | TTCAAAGTTTTTCCAATGGA[C/T]GTACACATGTGTTACTTTTA  |
| SJHQ | SJLGG040 | chr8  | 22578397  | 16 | 51 | 0 | 43 | G | A | TCACATGGTGACTTCTTCA[G/A]CACCCAAAACAGCCCAAGT    |
| SJHQ | SJLGG040 | chr8  | 60013695  | 24 | 56 | 0 | 37 | T | C | TGCACAAGTGAATGCAGGGG[T/C]ATTACAGAGCTCAATAGTAAT |
| SJHQ | SJLGG040 | chr8  | 71155661  | 31 | 78 | 0 | 47 | C | T | TTACTGAGGCTGGATTCCA[C/T]GCCAATGTAAGTTAACTTA    |
| SJHQ | SJLGG040 | chr8  | 74797388  | 12 | 66 | 0 | 46 | A | G | CCACATTGACGAGAAGCGAT[A/G]TCTAGTTTTCTCTCTCATT   |
| SJHQ | SJLGG040 | chr8  | 85214876  | 22 | 65 | 0 | 48 | C | T | AGTCAGTGAAAGCCATT[A/C]TJGGGTATATAGTAGAGGCAG    |
| SJHQ | SJLGG040 | chr9  | 131719657 | 8  | 55 | 0 | 49 | T | C | TATGCATATAAGCTGAGATC[T/C]GTCTTACTATGGAGGAGT    |
| SJHQ | SJLGG040 | chr9  | 22861253  | 11 | 60 | 0 | 44 | G | C | TAAAGACAGCTCAAAAAAG[G/C]GGTCTTAGAGAAATGATAAAA  |
| SJHQ | SJLGG040 | chrX  | 121701587 | 14 | 54 | 0 | 30 | A | C | TTTAAATCCCACATTTT[G/C]CTCTTGCTCTATAGCAGTTT     |
| SJHQ | SJLGG040 | chrX  | 132669214 | 15 | 42 | 0 | 38 | G | A | TCACCTGAGGCCAAGAGTGA[G/A]AGTTGCTCCCTATAAATCAT  |
| SJHQ | SJLGG042 | chr10 | 63452751  | 11 | 60 | 0 | 49 | A | G | ATCAAGAAAAATTTGAGAA[A/G]GAACTCCCTTTCTTCTTGT    |
| SJHQ | SJLGG042 | chr10 | 87795777  | 15 | 31 | 0 | 30 | C | T | GCAGGCTGTGAGGGCACAT[C/T]GCCAATGATACAATCAG      |
| SJHQ | SJLGG042 | chr11 | 117485046 | 9  | 30 | 0 | 33 | C | T | AGCCCTATGTAGGTAGAGT[C/T]TATATACACCCTGGTTCTT    |
| SJHQ | SJLGG042 | chr11 | 131493877 | 12 | 37 | 0 | 22 | G | A | CAAAGGCAGTTGCTCTGACC[G/A]JAGGTCACTAAAGGCTCTTAA |
| SJHQ | SJLGG042 | chr11 | 134501022 | 12 | 36 | 0 | 23 | A | G | CGCTTGTGGGTGCTCAGT[A/G]CCTACGTGCTGAGCAGCTCTG   |
| SJHQ | SJLGG042 | chr1  | 147011728 | 4  | 23 | 0 | 30 | G | A | CCCAAGTGTGTTACTACCG[C/G]JGAGGCTGCTCTTGGGGAGG   |
| SJHQ | SJLGG042 | chr1  | 157386814 | 7  | 31 | 0 | 40 | A | G | GCACCTTGAAGAATTCATG[A/G]GCAGTGCCTGCAATGGGTA    |
| SJHQ | SJLGG042 | chr11 | 83344623  | 9  | 29 | 0 | 22 | T | C | CCCACTTGTAAAAAGTCCA[T/C]JGGGGCTGGGAGAGGGAGGA   |
| SJHQ | SJLGG042 | chr1  | 194727884 | 11 | 36 | 0 | 47 | C | A | AAAGTTAATTCATTACATTT[C/A]JCTCCACAGGATCCCTTTTC  |
| SJHQ | SJLGG042 | chr12 | 103358188 | 11 | 34 | 0 | 33 | C | A | AACTAATGACTATATCAATG[C/A]JAGAGATACGTCTCTTAA    |
| SJHQ | SJLGG042 | chr12 | 23708942  | 16 | 55 | 0 | 36 | G | A | TATTGAAAGGCTGACATCA[G/A]JAGTGGATGGATGGATGACA   |
| SJHQ | SJLGG042 | chr12 | 24365435  | 9  | 27 | 0 | 20 | G | A | GGAAGCAGTAACACGGGAGG[G/A]GTTCAAGGAAGGAAGGATT   |
| SJHQ | SJLGG042 | chr1  | 237781250 | 17 | 35 | 0 | 27 | C | T | TACCCCAAAGTCAGTCT[C/T]TJGAGGGTACAACAGAACAAA    |
| SJHQ | SJLGG042 | chr12 | 5842883   | 10 | 28 | 0 | 30 | C | T | ATACTAAAACAACTGCAGG[C/T]GGTCCATTCTATCTCTCACC   |
| SJHQ | SJLGG042 | chr12 | 72951774  | 20 | 46 | 0 | 33 | A | G | CACACATACGCTCTTAT[A/G]TCTGCATTTTAAATACATATA    |
| SJHQ | SJLGG042 | chr12 | 90382608  | 17 | 45 | 0 | 41 | C | A | GGCCACAGGGACACAGTAAT[C/A]AGCTCTAATACTTTCTCTC   |
| SJHQ | SJLGG042 | chr12 | 95930850  | 19 | 38 | 0 | 44 | A | C | AGAGCTCTGGAGAAAGGAC[G/A]GTGATTAAGAGAGACTAGCA   |
| SJHQ | SJLGG042 | chr13 | 50353634  | 12 | 44 | 0 | 31 | T | C | CTCTCCACATCTCACACAT[C/T]CTTATATTTCTTATCCCTT    |
| SJHQ | SJLGG042 | chr13 | 66663803  | 17 | 38 | 0 | 37 | C | T | TGGTAATTTATCTTAAATAA[C/T]GACTGGCATTTTCCAAATAG  |
| SJHQ | SJLGG042 | chr13 | 69312831  | 23 | 55 | 0 | 51 | A | G | GATTTAGAAAAATAATATAT[A/G]TAATGACCAATACAGTGT    |
| SJHQ | SJLGG042 | chr13 | 82697335  | 5  | 35 | 0 | 57 | T | A | ATTGCTATATACATTATAT[T/A]TTTGACTCACTATGCTCTA    |
| SJHQ | SJLGG042 | chr14 | 43185055  | 13 | 49 | 0 | 38 | T | C | ATTTATGCCTTGTGTGTT[T/C]TATTTATCAAGTCCCAAGA     |
| SJHQ | SJLGG042 | chr14 | 44106752  | 11 | 39 | 0 | 48 | G | T | GTTACTAGTCTTAAAGAAAG[G/T]TTGCCATAATGATGAAA     |
| SJHQ | SJLGG042 | chr15 | 28088867  | 14 | 42 | 0 | 29 | T | A | ACCAGGTATTACTAGTTT[C/T]TJAGCAACCTGGAATGGCCA    |
| SJHQ | SJLGG042 | chr15 | 61306999  | 12 | 44 | 0 | 43 | T | C | CAAAGGGTGAAGAACAAA[T/C]JGGGTGGTCAAAATTAACAGC   |
| SJHQ | SJLGG042 | chr15 | 68998593  | 17 | 38 | 0 | 22 | A | G | CTGCCTCCTCACCCTCC[A/G]JATCCCAACTGCTCTTTTA      |
| SJHQ | SJLGG042 | chr16 | 34260217  | 22 | 60 | 0 | 34 | C | A | TTACTTCTGTTGAAATTA[C/A]JGTTGAGCTCTAAAAGTTTTTC  |
| SJHQ | SJLGG042 | chr16 | 34473615  | 20 | 61 | 0 | 46 | C | T | GGGCAGGGTGACAGTGAAG[G/C]TJAGGAAGTACATAACAATG   |
| SJHQ | SJLGG042 | chr16 | 34619744  | 14 | 44 | 0 | 44 | T | C | GGGCACAGAAATCAGATGA[T/C]JAGGGGAATCATTTTTCTAA   |
| SJHQ | SJLGG042 | chr16 | 71008340  | 16 | 36 | 0 | 26 | C | T | AAGAATCCTTTTAGCTGAT[C/C]TJAGAGGCACAAAAGCTGCTC  |
| SJHQ | SJLGG042 | chr16 | 7270107   | 19 | 47 | 0 | 30 | A | T | GCTGTATCAGACCAAA[A/T]JATCCATATTTCAACAAT        |
| SJHQ | SJLGG042 | chr17 | 13109548  | 20 | 40 | 1 | 47 | T | C | CCTCCAAATATCTAGCTT[A/T]CTTTTATATCTATAAGGAAT    |
| SJHQ | SJLGG042 | chr17 | 39733188  | 6  | 30 | 0 | 22 | G | A | CATGTAGCTGGCTGCTGGGA[G/A]JAGGGAGCACCCGCTGAGTCA |
| SJHQ | SJLGG042 | chr1  | 74441728  | 4  | 38 | 0 | 46 | C | A | TACCTACTTAAAAATAAT[C/A]JAATTTTATAATGCCTTGG     |
| SJHQ | SJLGG042 | chr1  | 82642976  | 17 | 36 | 0 | 53 | C | T | TTTCAAGAGTCAATTTCTA[C/T]TCAACAGGAAGCATTTGGA    |
| SJHQ | SJLGG042 | chr18 | 28225379  | 20 | 34 | 0 | 35 | G | A | TCTTCTATTGTTGATTTG[C/G]AJATATCAGGTGGTTTAGATGT  |
| SJHQ | SJLGG042 | chr18 | 37724780  | 25 | 50 | 0 | 37 | A | G | TTCATCTACAGAAAAAAA[A/G]TJGAGTAAAAATTTGCCAGA    |
| SJHQ | SJLGG042 | chr18 | 58143049  | 21 | 38 | 0 | 39 | A | G | ATATTAAGTCAAAAAAGAA[A/G]TGACATTTAAATTTATTGAT   |
| SJHQ | SJLGG042 | chr20 | 44184061  | 23 | 55 | 0 | 39 | C | T | AAGGGGGCACACCTGGCTTT[C/T]JGGGTACATTTGCCAAGATC  |
| SJHQ | SJLGG042 | chr2  | 115868085 | 5  | 43 | 0 | 48 | T | A | CATTATCTAAATTAAGGATTT[A]TAAGTTATTTACTATAAGT    |
| SJHQ | SJLGG042 | chr2  | 128166491 | 8  | 23 | 0 | 15 | G | C | GTTGGCCCTTAGCCGCTAGG[G/C]GTGGAAGAGACTTAGCCGGAC |
| SJHQ | SJLGG042 | chr2  | 139098547 | 11 | 25 | 0 | 39 | G | T | CAGAGCAGTACAATAATAG[T]TACTCAAAATAATGGGGTT      |
| SJHQ | SJLGG042 | chr2  | 167758369 | 21 | 39 | 0 | 45 | A | G | TTTTCTGACTGTTCACTG[C/A]GTGGCTTTGTCTTAAAAATA    |
| SJHQ | SJLGG042 | chr2  | 167928226 | 10 | 35 | 0 | 38 | C | T | AAACATGAGAACTATGAAA[C/T]JGGGAAAGTATTATGGACCC   |
| SJHQ | SJLGG042 | chr2  | 183982465 | 19 | 56 | 0 | 44 | C | T | GTTGATTTGATTTATATAC[T]JAAACACTGCATATTTGTTGGA   |

|      |          |      |           |    |    |   |    |   |   |                                                 |
|------|----------|------|-----------|----|----|---|----|---|---|-------------------------------------------------|
| SJHQ | SJLGG042 | chr2 | 189223568 | 27 | 56 | 0 | 52 | C | T | ATAGTCATTAGTTTAAATAA[C/T]GTTATTAACATTGGACATCC   |
| SJHQ | SJLGG042 | chr2 | 27791546  | 12 | 26 | 0 | 30 | G | A | ACGGAAGATACAAAATCTGC[G/A]GAGTTGGCCCCAAAGCCATG   |
| SJHQ | SJLGG042 | chr3 | 103418758 | 25 | 50 | 0 | 33 | A | T | GTAATGCATGAAGGGAAAT[A/T]AATAATCTGTAACATAATC     |
| SJHQ | SJLGG042 | chr4 | 114129617 | 8  | 43 | 0 | 45 | A | G | ATAGATGGTAATGCAACACT[A/G]TAATATAAAAACAGTGCATAA  |
| SJHQ | SJLGG042 | chr4 | 118804695 | 10 | 52 | 0 | 44 | A | G | GTACTAATTTAGACACCA[A/G]TAAAGGTAATGATGGCACAA     |
| SJHQ | SJLGG042 | chr4 | 137905203 | 17 | 36 | 0 | 51 | G | A | ATGCTGAATGTATGTTTG[C/G/A]CGAGATTGGAACTCTTTTT    |
| SJHQ | SJLGG042 | chr4 | 161502284 | 16 | 47 | 0 | 38 | G | A | GTATATGGCCATGTTTTAA[A/G]CTACTGTTTTAGAGAGAATT    |
| SJHQ | SJLGG042 | chr4 | 163029819 | 7  | 39 | 0 | 48 | T | C | AATGAATAAGAGAAAATTA[T/C]TTGATGATGCTATTAAAAT     |
| SJHQ | SJLGG042 | chr4 | 18101297  | 9  | 41 | 0 | 44 | C | T | AATAAATAGAGCAAGT[CAG/C/T]TTCCAGGATAATCAAGAAG    |
| SJHQ | SJLGG042 | chr4 | 29028281  | 17 | 40 | 0 | 37 | T | G | AAAGTTACATTTGAGAACCT[G/C]TTGAGATTGGAACTTGACT    |
| SJHQ | SJLGG042 | chr4 | 67001322  | 23 | 46 | 0 | 47 | T | A | AGCATATTTGATGTATGATA[T/A]TTTTTAGCTTCATACCTATT   |
| SJHQ | SJLGG042 | chr4 | 67826777  | 19 | 42 | 0 | 37 | A | G | CTTTGCAAGTACTTTCTT[C/A/G]TACATGCTTTACATGCTTCT   |
| SJHQ | SJLGG042 | chr4 | 70082922  | 5  | 37 | 0 | 50 | G | A | AAATGCCTACTCCTGAACCT[G/A]TTTCCACAGATTGTCTTGTA   |
| SJHQ | SJLGG042 | chr4 | 77232501  | 18 | 55 | 0 | 44 | C | T | GACTGGAGGGAAATCAGCA[C/T]GCGCTGACTTTGAAATGAAT    |
| SJHQ | SJLGG042 | chr5 | 101915115 | 20 | 63 | 0 | 46 | T | C | TACTACATTTTCTATGATT[T/C]CTGGATCACTGTTGTTTAA     |
| SJHQ | SJLGG042 | chr5 | 106338223 | 18 | 50 | 0 | 36 | A | G | TGACATTAGAAAAGTAACT[C/A/G]CCTAAGTGAATTTCTACGT   |
| SJHQ | SJLGG042 | chr5 | 116124258 | 17 | 41 | 0 | 32 | C | G | AGAGTATATTATGTGGAACC[C/G]ATATGATGTAGCCCTGATCT   |
| SJHQ | SJLGG042 | chr5 | 120415161 | 19 | 41 | 0 | 45 | A | T | TCCTTTAGTACTAGTAAA[A/T]AATTTCCCTGTTGAAATAAAGA   |
| SJHQ | SJLGG042 | chr5 | 2418763   | 13 | 27 | 0 | 15 | G | A | CGAGGGCCGCGCTCTCC[C/G/A]TCCTGCTGGGGAGTTTTAGC    |
| SJHQ | SJLGG042 | chr5 | 49737838  | 12 | 54 | 0 | 38 | C | A | GGAATATTCAGTGCTCTGAA[C/A]CAAATAAATAAATAGTGC     |
| SJHQ | SJLGG042 | chr5 | 91631249  | 21 | 58 | 0 | 56 | T | A | ATTATGATTAAGATAAGAA[T/A]TTTTAGCTTTCTGTTTCTC     |
| SJHQ | SJLGG042 | chr6 | 104513070 | 19 | 48 | 0 | 27 | C | T | GCAATGTCCATGGTGACATT[C/T]GATATGTCCAAAATCAGGA    |
| SJHQ | SJLGG042 | chr6 | 123440466 | 16 | 49 | 0 | 47 | T | C | TAGATGTCATTGTGGAGAT[C/T]TATGGAACTCTGTATCT       |
| SJHQ | SJLGG042 | chr6 | 124585072 | 10 | 69 | 0 | 53 | A | G | TCTGATGTGCAAACTATGGA[A/G]AATGGCAATTTTGAAGCACC   |
| SJHQ | SJLGG042 | chr6 | 127312317 | 27 | 72 | 0 | 41 | G | A | TAACCCAAAGTACCTAAAC[C/G/A]TGGTTTTCTATACAACCTA   |
| SJHQ | SJLGG042 | chr6 | 129370848 | 25 | 60 | 0 | 36 | A | G | AAAATTAAGAGAGGCTTAA[A/G]GTCATACCTTAAGACCCAGA    |
| SJHQ | SJLGG042 | chr6 | 140865799 | 18 | 55 | 0 | 36 | T | C | GAGATTGATGACTGATGCG[C/T]GAACTTTCTGATTTCAAGA     |
| SJHQ | SJLGG042 | chr6 | 147982623 | 17 | 41 | 0 | 32 | C | T | TCTCTGAAGAAATGCCAG[C/T]CCCAAATATTAGTCACTCT      |
| SJHQ | SJLGG042 | chr6 | 167707048 | 8  | 23 | 0 | 16 | C | T | GCCCCAGCATGCTGAGGAG[C/T]GAGCCACCTCTCTCCAAGA     |
| SJHQ | SJLGG042 | chr6 | 39690845  | 15 | 33 | 0 | 39 | A | T | CCCATGTAGATAAGCTCAAC[A/T]GTTTAAAGTAAGAAATCTGGG  |
| SJHQ | SJLGG042 | chr6 | 44465356  | 14 | 30 | 0 | 25 | C | T | CAGTGGCAGGTTCTTACAC[C/T]GATGTGCAAAACCCACCAAAA   |
| SJHQ | SJLGG042 | chr6 | 4468155   | 7  | 45 | 0 | 32 | T | A | GAATCAGCAGCTTAGAGATT[T/A]TTATACCTTAATAAAAA      |
| SJHQ | SJLGG042 | chr6 | 48829667  | 8  | 33 | 0 | 48 | G | A | ACAGCCCCAGCTGATCACA[A/G]CTTTATGTTTTGGGTAACA     |
| SJHQ | SJLGG042 | chr6 | 50654102  | 20 | 44 | 0 | 31 | A | C | TCCCCTGATTCTGGTCACGA[A/C]TTTTTATGTTCTTCTTGT     |
| SJHQ | SJLGG042 | chr6 | 62402231  | 30 | 61 | 0 | 55 | T | C | AGAAATGTAATTTAAATG[T/C]TATAGTAAACCAATGAAAA      |
| SJHQ | SJLGG042 | chr6 | 62492528  | 7  | 26 | 0 | 23 | G | T | AGCTATTATGATGCAAAA[A/G]TACCCTAAAATTTTAAATGCA    |
| SJHQ | SJLGG042 | chr6 | 63352206  | 17 | 37 | 0 | 41 | T | A | GTTCCCACTGTGCTTTAGA[T/A]CTCTAGTCTCAGTCTTCTT     |
| SJHQ | SJLGG042 | chr6 | 85687786  | 12 | 35 | 0 | 27 | T | A | TCACTGGAAGCTTCTGATGA[T/A]CTACCCCTGTAACCTGACTACT |
| SJHQ | SJLGG042 | chr7 | 105843293 | 16 | 43 | 0 | 38 | C | T | ATCAAACTATTGTACACC[C/T]AGTATCTGTTCAAACTGCA      |
| SJHQ | SJLGG042 | chr7 | 122388492 | 7  | 43 | 0 | 39 | T | G | TATTTGCAAGAAACAGTGA[C/T]GATGTTTATCACAAAGTAT     |
| SJHQ | SJLGG042 | chr7 | 153602784 | 24 | 52 | 0 | 43 | T | A | GAAACCTGGGTATCTATAAC[T/A]TGTGAAGGCTGAGGAATAGA   |
| SJHQ | SJLGG042 | chr7 | 158778196 | 17 | 40 | 0 | 34 | G | A | TCCTCTTTTCCCTCTGCT[C/G/A]TCCACCTGGCTGCATGGCC    |
| SJHQ | SJLGG042 | chr7 | 40944926  | 25 | 59 | 0 | 36 | T | C | TAAAACATCTCTCTTTGA[T/C]TACAACCTGAAGAATTTATG     |
| SJHQ | SJLGG042 | chr7 | 5667974   | 17 | 43 | 0 | 26 | T | C | TACAATTTTATCATAAATCA[T/C]GAGCCAACTGCAAGTATAC    |
| SJHQ | SJLGG042 | chr7 | 57574240  | 19 | 62 | 0 | 38 | G | T | AAATTTTCCCTTAAACTCT[G/T]GAATCTTTTTAGATAATGT     |
| SJHQ | SJLGG042 | chr7 | 67984440  | 8  | 46 | 0 | 36 | A | G | ATAAGCATTGGCTTTCTCC[A/G]AGTGGTTCCTCGGAGCTAC     |
| SJHQ | SJLGG042 | chr7 | 88626387  | 26 | 68 | 0 | 42 | A | T | CATAATGCTTTAAGGCAAT[A/T]GTTTAACTGATACACACTT     |
| SJHQ | SJLGG042 | chr7 | 95377491  | 17 | 46 | 0 | 38 | G | A | TCACCCAAAACCTGCCAAG[C/G/A]CTACGCTAGGCATAACATAA  |
| SJHQ | SJLGG042 | chr7 | 97406557  | 10 | 37 | 0 | 30 | G | T | GATGTGGGCAAAATCATA[A/G]TCTAGAAAAGCTATGATTGTC    |
| SJHQ | SJLGG042 | chr8 | 125162648 | 23 | 62 | 0 | 38 | C | T | GAATCAAACTCAGTTCA[T/C]GAGTGAAAAACAGATCAGGA      |
| SJHQ | SJLGG042 | chr8 | 126947124 | 19 | 62 | 0 | 39 | A | T | CTAAAATGTATGTTTTGTAT[A/T]JACCACAACAGAAAGAAAT    |
| SJHQ | SJLGG042 | chr8 | 15776815  | 17 | 55 | 0 | 48 | A | G | TAGAAATAAACACTCCCTAG[A/G]AAGGCTACCTAAAATATT     |
| SJHQ | SJLGG042 | chr8 | 16135288  | 28 | 59 | 0 | 46 | T | C | ATTTTTCTTTGATTATTTT[T/C]CTTTTTTTTCTGATTTTTTGC   |
| SJHQ | SJLGG042 | chr8 | 21003445  | 15 | 46 | 1 | 44 | G | A | CTTTGATCCTTAAATGATGA[G/A]ATCTCAAAAACCTCTCAAGG   |
| SJHQ | SJLGG042 | chr8 | 61612793  | 8  | 60 | 0 | 35 | G | A | ATACTAAATAGTACTTGGT[G/A]ATTGCTTGCCCTAGGCTCTT    |
| SJHQ | SJLGG042 | chr8 | 73951541  | 14 | 48 | 0 | 37 | C | G | TTATTTCTGTTCAACCTCCC[C/G]AAAATTTTGGAGTAAAATA    |
| SJHQ | SJLGG042 | chr9 | 85196455  | 23 | 43 | 0 | 33 | C | A | TTAGGCCTACCCACTAGTGC[C/G/A]AAAAGGGGTGCTGCAGGT   |
| SJHQ | SJLGG042 | chr9 | 87205980  | 7  | 44 | 0 | 27 | T | C | CTTCAAATGGGAGACTTTG[T/C]TTCTGTTTTCTTTCTGATG     |
| SJHQ | SJLGG042 | chrX | 123245177 | 11 | 35 | 0 | 36 | C | T | GCTTTAAAATGAAAAAG[A/C/T]ATTACAAAGTATACCTTTG     |
| SJHQ | SJLGG042 | chrX | 139153660 | 13 | 39 | 0 | 30 | G | A | TTTTTCTCTGCAGCACA[A/G]AGGGTAGGGTTGGTAGGGGGA     |
| SJHQ | SJLGG042 | chrX | 26492742  | 8  | 41 | 0 | 36 | C | G | TGGGGGATAGCCCAAAGCA[C/G]TGACAAATCTGTGACTACAT    |
| SJHQ | SJLGG042 | chrX | 36071021  | 4  | 35 | 0 | 41 | T | C | AGTGCTTTAAATGTATATT[T/C]JAGCATGCCCTTTCTAGATAC   |
| SJHQ | SJLGG042 | chrX | 72359724  | 14 | 34 | 0 | 53 | G | A | CTGAGTACCCTAGTGCAAAAG[A/G]AATCCTCCCTTTCTAGGAA   |
| SJHQ | SJLGG042 | chrX | 78469019  | 16 | 37 | 0 | 32 | T | A | TGTGTATGTGTCTCTGAG[T/A]GTTAAAATTTTATTTTATTT     |
| SJHQ | SJLGG042 | chrX | 92593457  | 12 | 29 | 0 | 43 | C | T | TTGATCTTCATGTGCTCAG[C/T]TTGAGTTAGTTTACCATATC    |

Supplementary Table 6

Copy number alterations identified in WGS data

Seg\_mean is the mean of the difference (adjusted for GC content) between the normalized read depth in paired Diagnosis (D) and Germline (G) samples in each genomic segment. Gene List records the first five and the last five genes in a genomic interval. If the total number of genes exceed 10, Log2Ratio is the mean of the GC-corrected log2 (read depth of normalized D/G) in each genomic segment.

| Sample     | Chromosome | loc.start | loc.end   | seg.mean | Log2Ratio | Size                                                                | Gene List                                                                          |
|------------|------------|-----------|-----------|----------|-----------|---------------------------------------------------------------------|------------------------------------------------------------------------------------|
| SJLGG001_D | 7          | 138547083 | 140480022 | 0.39     | 0.47      | CURATED                                                             | KIAA1549,ZC3HAV1L,ZC3HAV1,TTTC26,UBN2,MKRN1,DDND2A,ADCK2,NDUF82,BRAF               |
| SJLGG002_D | 7          | 138543819 | 140490296 | 0.365    | 0.453     | CURATED                                                             | KIAA1549,ZC3HAV1L,ZC3HAV1,TTTC26,UBN2,MKRN1,DDND2A,ADCK2,NDUF82,BRAF               |
| SJLGG002_D | X          | 124405701 | 124414900 | -0.263   | -1.154    | CURATED                                                             |                                                                                    |
| SJLGG003_D | 10         | 104547760 | 104547967 | -0.207   | -0.535    | CURATED_FOCAL                                                       | C10orf26                                                                           |
| SJLGG003_D | 17         | 62200503  | 62200668  | 0.213    | 0.218     | CURATED_FOCAL                                                       | TEX2                                                                               |
| SJLGG003_D | 7          | 138549568 | 140489475 | 0.253    | 0.314     | CURATED                                                             | KIAA1549,ZC3HAV1L,ZC3HAV1,TTTC26,UBN2,MKRN1,DDND2A,ADCK2,NDUF82,BRAF               |
| SJLGG004_D | 7          | 138546757 | 140487585 | 0.262    | 0.331     | CURATED                                                             | KIAA1549,ZC3HAV1L,ZC3HAV1,TTTC26,UBN2,MKRN1,DDND2A,ADCK2,NDUF82,BRAF               |
| SJLGG005_D | 5          | 140843463 | 140857800 | -0.157   | -0.222    | CURATED                                                             | PCDHGA1,PCDHGA2,PCDHGA3,PCDHGB1,PCDHGA4,PCDHGA10,PCDHGB7,PCDHGA11,PCDHGA12,PCDHGC3 |
| SJLGG005_D | 6          | 104635199 | 104664173 | -0.155   | -0.258    | CURATED                                                             |                                                                                    |
| SJLGG005_D | 6          | 138273347 | 138273507 | -0.55    | -0.599    | CURATED                                                             |                                                                                    |
| SJLGG006_D | 8          | 38271155  | 38276284  | 0.198    | 0.336     | CURATED_FOCAL                                                       | FGFR1                                                                              |
| SJLGG007_D | 7          | 138548949 | 140490793 | 0.2      | 0.272     | CURATED                                                             | KIAA1549,ZC3HAV1L,ZC3HAV1,TTTC26,UBN2,MKRN1,DDND2A,ADCK2,NDUF82,BRAF               |
| SJLGG008_D | 11         | 2954001   | 135006516 | 0.25     | 0.31      | CURATED                                                             | NAP1L4,CARS,OSBPL5,MRGPRG,MRGPR,THYN1,ACAD8,GLB1L3,GLB1L2,B3GAT1                   |
| SJLGG008_D | 4          | 3521101   | 191154276 | 0.15     | 0.175     | CURATED                                                             | LRPAP1,ADRA2C,OTOP1,TMEM128,LYAR,DUX4L4,DUX4L5,DUX4L6,DUX4L7,DUX4                  |
| SJLGG008_D | 5          | 1         | 180915260 | 0.149    | 0.177     | CURATED                                                             | PLEKHG4B,LRRC14B,CDC127,SDHA,PDCD6,GNB2L1,TRIM52,ORAF16,ORAF29,ORAF3               |
| SJLGG008_D | 6          | 1         | 171115067 | 0.285    | 0.332     | CURATED                                                             | GPX5,SCAND3,TRIM27,ZNF311,DUSP22,DL1L1,FAM120B,PSMB1,TBP,PCDC2                     |
| SJLGG008_D | 7          | 1         | 159138663 | 0.275    | 0.332     | CURATED                                                             | LOC389831,FAM20C,LOC100288524,PDGFA,PRKAR1B,PTPRN2,NCAPG2,ESYT2,WDR60,VIIP2        |
| SJLGG008_D | 8          | 1         | 38271148  | 0.264    | 0.321     | CURATED                                                             | ORAF21,ZNF596,FBXO25,C8orf42,ERICH1,DDHD2,PPAPDC1B,WHSC1L1,LETM2,FGFR1             |
| SJLGG008_D | 8          | 38271149  | 38277105  | 0.578    | 0.828     | CURATED_FOCAL                                                       | FGFR1                                                                              |
| SJLGG008_D | 8          | 38277106  | 146364022 | 0.269    | 0.316     | CURATED                                                             | FGFR1,C8orf86,TACC1,PLEKHA2,HTRA4,ZNF7,COMM5D,ZNF250,ZNF16,C8orf33                 |
| SJLGG009_D | 11         | 65286605  | 65285793  | -0.221   | -0.358    | CURATED                                                             |                                                                                    |
| SJLGG009_D | 7          | 138541101 | 140489604 | 0.284    | 0.359     | CURATED                                                             | KIAA1549,ZC3HAV1L,ZC3HAV1,TTTC26,UBN2,MKRN1,DDND2A,ADCK2,NDUF82,BRAF               |
| SJLGG010_D | 11         | 1         | 135006516 | 0.362    | 0.439     | CURATED                                                             | LOC653486,SCGB1C1,ODF3,BET1L,RICHA,THYN1,ACAD8,GLB1L3,GLB1L2,B3GAT1                |
| SJLGG010_D | 7          | 138539401 | 140493100 | 0.391    | 0.474     | CURATED                                                             | KIAA1549,ZC3HAV1L,ZC3HAV1,TTTC26,UBN2,MKRN1,DDND2A,ADCK2,NDUF82,BRAF               |
| SJLGG011_D | 5          | 1         | 180915260 | 0.135    | 0.171     | CURATED                                                             | PLEKHG4B,LRRC14B,CDC127,SDHA,PDCD6,GNB2L1,TRIM52,ORAF16,ORAF29,ORAF3               |
| SJLGG011_D | 7          | 138543701 | 140488667 | 0.405    | 0.485     | CURATED                                                             | KIAA1549,ZC3HAV1L,ZC3HAV1,TTTC26,UBN2,MKRN1,DDND2A,ADCK2,NDUF82,BRAF               |
| SJLGG012_D | 5          | 1         | 180915260 | 0.303    | 0.373     | CURATED                                                             | PLEKHG4B,LRRC14B,CDC127,SDHA,PDCD6,GNB2L1,TRIM52,ORAF16,ORAF29,ORAF3               |
| SJLGG012_D | 7          | 138552320 | 140490511 | 0.28     | 0.35      | CURATED                                                             | KIAA1549,ZC3HAV1L,ZC3HAV1,TTTC26,UBN2,MKRN1,DDND2A,ADCK2,NDUF82,BRAF               |
| SJLGG013_D | 7          | 138550301 | 140489000 | 0.163    | 0.214     | CURATED                                                             | KIAA1549,ZC3HAV1L,ZC3HAV1,TTTC26,UBN2,MKRN1,DDND2A,ADCK2,NDUF82,BRAF               |
| SJLGG015_D | 10         | 37491201  | 37529600  | 0.141    | 0.186     | CURATED_FOCAL                                                       | ANKRD30A                                                                           |
| SJLGG015_D | 7          | 138543473 | 140481674 | 0.164    | 0.215     | CURATED                                                             | KIAA1549,ZC3HAV1L,ZC3HAV1,TTTC26,UBN2,MKRN1,DDND2A,ADCK2,NDUF82,BRAF               |
| SJLGG016_D | 8          | 67574936  | 67575315  | -0.188   | -0.32     | CURATED_FOCAL                                                       | VCPIP1                                                                             |
| SJLGG018_D | 6          | 31922345  | 31922471  | -0.292   | -0.508    | CURATED_FOCAL                                                       | RDBP                                                                               |
| SJLGG018_D | 8          | 38271014  | 38683008  | 0.382    | 0.479     | CURATED_FOCAL                                                       | FGFR1,C8orf86,TACC1                                                                |
| SJLGG018_D | 8          | 38689182  | 38724513  | 0.419    | 0.494     | CURATED_FOCAL                                                       | TACC1                                                                              |
| SJLGG019_D | 3          | 12645604  | 12685300  | -0.142   | -0.234    | CURATED_FOCAL                                                       | RAF1                                                                               |
| SJLGG019_D | 6          | 163899901 | 163940903 | 0.215    | 0.271     | CURATED_FOCAL                                                       | QKI                                                                                |
| SJLGG020_D | 7          | 138537132 | 140494105 | 0.42     | 0.501     | CURATED                                                             | KIAA1549,ZC3HAV1L,ZC3HAV1,TTTC26,UBN2,MKRN1,DDND2A,ADCK2,NDUF82,BRAF               |
| SJLGG021_D | 7          | 138548153 | 140490561 | 0.3      | 0.373     | CURATED                                                             | KIAA1549,ZC3HAV1L,ZC3HAV1,TTTC26,UBN2,MKRN1,DDND2A,ADCK2,NDUF82,BRAF               |
| SJLGG024_D | 7          | 138540541 | 140491303 | 0.324    | 0.411     | CURATED                                                             | KIAA1549,ZC3HAV1L,ZC3HAV1,TTTC26,UBN2,MKRN1,DDND2A,ADCK2,NDUF82,BRAF               |
| SJLGG025_D | 7          | 138547246 | 140493653 | 0.219    | 0.284     | CURATED                                                             | KIAA1549,ZC3HAV1L,ZC3HAV1,TTTC26,UBN2,MKRN1,DDND2A,ADCK2,NDUF82,BRAF               |
| SJLGG027_D | 7          | 138548658 | 140488745 | 0.26     | 0.342     | CURATED                                                             | KIAA1549,ZC3HAV1L,ZC3HAV1,TTTC26,UBN2,MKRN1,DDND2A,ADCK2,NDUF82,BRAF               |
| SJLGG028_D | 11         | 89838401  | 89883600  | 0.17     | 0.203     | CURATED_FOCAL                                                       | NAALAD2                                                                            |
| SJLGG028_D | 7          | 138553001 | 140493800 | 0.439    | 0.537     | CURATED                                                             | KIAA1549,ZC3HAV1L,ZC3HAV1,TTTC26,UBN2,MKRN1,DDND2A,ADCK2,NDUF82,BRAF               |
| SJLGG032_D | 7          | 138541228 | 140492960 | 0.352    | 0.436     | CURATED                                                             | KIAA1549,ZC3HAV1L,ZC3HAV1,TTTC26,UBN2,MKRN1,DDND2A,ADCK2,NDUF82,BRAF               |
| SJLGG033_D | 13         | 113994377 | 113994727 | -0.149   | -0.334    | CURATED_FOCAL                                                       | GRTP1                                                                              |
| SJLGG033_D | 8          | 40079668  | 40081746  | -0.128   | -0.202    | CURATED                                                             |                                                                                    |
| SJLGG033_D | 8          | 82753337  | 82753858  | -0.151   | -0.387    | CURATED_FOCAL                                                       | SNX16                                                                              |
| SJLGG034_D | 1          | 121351600 | -0.409    | -0.787   | CURATED   | SRSF10,ORAF5,ORAF16,ORAF29,ORAF3,NBPFF7,ADAM30,NOTCH2,FAM72B,FCGR1B |                                                                                    |
| SJLGG034_D | 19         | 27890301  | 59128983  | -0.4     | -0.819    | CURATED                                                             | UOCRF51,VSTM2B,POP4,PLEKHF1,C19orf12,ZBTB45,TRIM28,CHMP2A,UBE2M,MZF1               |
| SJLGG035_D | 6          | 135491705 | 135495475 | -0.297   | -0.477    | CURATED                                                             |                                                                                    |
| SJLGG035_D | 6          | 135495476 | 135540964 | 6.32     | 2.911     | CURATED_FOCAL                                                       | MYB                                                                                |
| SJLGG035_D | 6          | 135540965 | 136741488 | -0.311   | -0.52     | CURATED                                                             | AH1L1,PDZB,FAM54A,BCLAF1,MAP7                                                      |
| SJLGG035_D | 6          | 136741489 | 136882616 | 6.447    | 2.86      | CURATED_FOCAL                                                       | MAP7,MAP3K5                                                                        |
| SJLGG035_D | 6          | 136882617 | 136884679 | -0.261   | -0.431    | CURATED_FOCAL                                                       | MAP3K5                                                                             |
| SJLGG035_D | 8          | 87411636  | 87411711  | 0.325    | 0.33      | CURATED_FOCAL                                                       | WWP1                                                                               |
| SJLGG035_D | 8          | 87411712  | 88417777  | -0.324   | -0.53     | CURATED_FOCAL                                                       | WWP1,FAM82B,CPNE3,CNGB3,CNBD1                                                      |
| SJLGG035_D | 8          | 88417778  | 89335431  | 6.861    | 2.872     | CURATED_FOCAL                                                       | DCAF4L2,MMP16                                                                      |
| SJLGG035_D | 8          | 89335432  | 91617806  | -0.32    | -0.522    | CURATED                                                             | MMP16,RIPK2,OSGIN2,NBN,DECR1,CALB1                                                 |
| SJLGG038_D | 12         | 12018549  | 12018558  | -0.408   | -0.488    | CURATED_FOCAL                                                       | ETV6                                                                               |
| SJLGG038_D | 13         | 105810501 | 105826300 | 0.19     | 0.247     | CURATED                                                             |                                                                                    |
| SJLGG038_D | 7          | 17355201  | 17377100  | 0.211    | 0.26      | CURATED_FOCAL                                                       | AHR                                                                                |
| SJLGG038_D | 9          | 14731424  | 21749000  | -0.212   | -0.342    | CURATED                                                             | FREM1,TTTC39B,SNAPC3,PSIP1,C9orf93,IFNA13,IFNA2,IFNA8,IFNA11,IFNE                  |
| SJLGG038_D | 9          | 21749001  | 22015572  | -0.496   | -0.968    | CURATED_FOCAL                                                       | MTAP,CDKN2A,CDKN2B                                                                 |
| SJLGG038_D | 9          | 22015573  | 78518259  | -0.182   | -0.291    | CURATED                                                             | DMRTA1,ELAVL2,TUSC1,LOC100506422,C9orf82,C9orf80,C9orf41,C9orf95,OSTF1,PCSK5       |
| SJLGG038_D | 9          | 78559926  | 78562969  | -0.154   | -0.255    | CURATED_FOCAL                                                       | PCSK5                                                                              |
| SJLGG038_D | 9          | 78566224  | 78583404  | -0.191   | -0.31     | CURATED_FOCAL                                                       | PCSK5                                                                              |
| SJLGG038_D | 9          | 78654643  | 78663079  | -0.161   | -0.251    | CURATED_FOCAL                                                       | PCSK5                                                                              |
| SJLGG038_D | 9          | 78666783  | 78671456  | 0.359    | 0.419     | CURATED_FOCAL                                                       | PCSK5                                                                              |
| SJLGG038_D | 9          | 84653505  | 89337632  | -0.21    | -0.341    | CURATED                                                             | RASEF,FRMD3,C9orf103,UBQLN1,OKAP1,NAAS3,GOLM1,C9orf153,ISCA1,ZCCHC6                |
| SJLGG038_D | 9          | 89340180  | 89348567  | -0.232   | -0.364    | CURATED                                                             |                                                                                    |
| SJLGG038_D | 9          | 116237623 | 125028999 | -0.198   | -0.329    | CURATED                                                             | RGS3,ZNF618,AMBPKIF12,COL27A1,NDUFAB,MORN5,LHX6,RBM18,MRFF                         |
| SJLGG039_D | 1          | 1196437   | 3649437   | 0.105    | 0.174     | CURATED                                                             | UBE2J2,SCNN1D,ACAP3,PUSL1,CPFS3L,ARHGEF16,MEGF6,TFRG1L,WRAP73,TP73                 |
| SJLGG039_D | 1          | 9555201   | 12584120  | 0.129    | 0.185     | CURATED                                                             | SLC25A33,TMEM201,PIK3CD,CLSTN1,CNTNBP1,MFN2,MIIP,TNFRSF8,TNFRSF1B,VPS13D           |
| SJLGG039_D | 10         | 95588803  | 98887881  | 0.139    | 0.181     | CURATED                                                             | TMEM20,PLCE1,NOCL3,TBC1D12,HELLS,TM9SF3,PIK3AP1,LCOOR,C10orf12,SLIT1               |
| SJLGG039_D | 11         | 69966686  | 69541460  | 0.123    | 0.183     | CURATED                                                             | KDM2A,ADRBK1,ANKRD13D,SSH3,POLD4,TPCND2,MYEOV,CNND1,ORAOV1,FGF19                   |
| SJLGG039_D | 11         | 115411801 | 118491726 | 0.133    | 0.186     | CURATED                                                             | BUD13,ZNF259,APOA5,APOA4,APOC3,CTC36,TMEM25,IFT46,ARCN1,PHLBD1                     |
| SJLGG039_D | 12         | 103110023 | 106295960 | 0.135    | 0.174     | CURATED                                                             | PAH,ASCL1,C12orf42,STAB2,NTSDC3,C12orf45,ALDH1L2,KIAA1033,APPL2,C12orf75           |
| SJLGG039_D | 16         | 410315    | 2172065   | 0.093    | 0.16      | CURATED                                                             | MRPL28,TMEM8A,NME4,DECR2,RAB11FIP3,NPW,SLC9A3R2,NTHL1,TSC2,PKD1                    |
| SJLGG039_D | 22         | 44632201  | 47557135  | 0.127    | 0.195     | CURATED                                                             | KIAA1644,LDLOC1L,PRRS5,PRRS5-ARHGAP8,ARHGAP8,TRMU,CELSR1,GRAMD4,CERK,TBC1D22A      |
| SJLGG039_D | 3          | 9662023   | 12649233  | 0.136    | 0.188     | CURATED                                                             | MTMR14,CPNE9,BRPF1,OGG1,CAMK1,PPARG,TSEN,LOC100129480,MKRN2,RAF1                   |
| SJLGG039_D | 3          | 46001511  | 49169000  | 0.13     | 0.182     | CURATED                                                             | FYCO1,XCR1,CCR1,CCR2,CCR2,IMPDH2,QRICH1,QAARS,USP19,LAMB2                          |
| SJLGG039_D | 3          | 183723574 | 186716600 | 0.132    | 0.178     | CURATED                                                             | ABCC5,HTR3D,HTR3C,HTR3E,EIF2B5,KNG1,EIF4A2,RFCA,ADIPOQ,ST6GAL1                     |
| SJLGG039_D | 4          | 1899271   | 5039610   | 0.131    | 0.188     | CURATED                                                             | WHSC1,WHSC2,C4orf46,NAT8L,POLN,ZBTB49,D4S234E,STX18,MSX1,CYT11                     |
| SJLGG039_D | 7          | 8300098   | 9539556   | 0.204    | 0.255     | CURATED                                                             | CYTH3,C7orf70,RAC1,DAGLB,KDEL2,R2,MIOS,RPAS3,GLCCI1,ICA1,NXP1H                     |
| SJLGG040_D | 19         | 50565726  | 50566416  | -0.14    | -0.203    | CURATED_FOCAL                                                       |                                                                                    |
| SJLGG040_D | 6          | 134735463 | 135107989 | 4.623    | 2.461     | CURATED_FOCAL                                                       |                                                                                    |
| SJLGG040_D | 6          | 135420365 | 135517292 | 4.571    | 2.464     | CURATED_FOCAL                                                       | MYB                                                                                |
| SJLGG042_D | 1          | 1         | 249250621 | -0.168   | -0.265    | CURATED                                                             | SRSF10,ORAF5,ORAF16,ORAF29,ORAF3,LOC648627,SH3BP5L,ZNF672,ZNF692,POGB2             |
| SJLGG042_D | 13         | 1         | 115169878 | -0.175   | -0.261    | CURATED                                                             | TUBA3C,TPTE2,MPHOSPH8,PSPC1,ZMYM5,GAS6,RASA3,CDIC16,UPF3A,ZNF28                    |
| SJLGG042_D | 14         | 1         | 107349540 | -0.178   | -0.282    | CURATED                                                             | OR11H12,POTEG,POTEM,OR11H2,OR4Q3,MTA1,CRIP2,CRIP1,C14orf80,TMEM121                 |
| SJLGG042_D | 18         | 1         | 78077248  | -0.173   | -0.268    | CURATED                                                             | USP14,THOC1,COLEC12,CETN1,CLUL1,HSPB1L1,TXNL4A,RFBA,ADNP2,PARO6G                   |
| SJLGG042_D | 2          | 1         | 243199373 | -0.181   | -0.29     | CURATED                                                             | FAM110C,SH3YL1,ACP1,FAM150B,TMEM18,D2HGDD,GAL3S2,NEU4,PCDC1,C2orf85                |
| SJLGG042_D | 21         | 1         | 48128985  | -0.166   | -0.245    | CURATED                                                             | TPTE,BAGE2,BAGE3,BAGE4,BAGE5,C21orf58,PCNT,DIP2A,S100B,PRMT2                       |
| SJLGG042_D | 22         | 1         | 51306466  | -0.124   | -0.235    | CURATED                                                             | POTEH,OR11H1,CT8L2,XKR3,GAB4,MAPK8IP2,ARSA,SHANK3,ACR,RABL2B                       |
| SJLGG042_D | 3          | 1         | 198022430 | -0.174   | -0.271    | CURATED                                                             | CHL1,CNTN6,CNTN4,ILSR,TRNT1,LRCH3,IQCC,RP3L5A,MLN,FAM157A                          |
| SJLGG042_D | 4          | 1         | 191154276 | -0.184   | -0.265    | CURATED                                                             | YTHDC1,ZNF595,ZNF718,MAFIP,TPRSS31E,DUX4L4,DUX4L5,DUX4L6,DUX4L7,DUX4               |
| SJLGG042_D | 7          | 138540270 | 140488759 | 0.405    | 0.47      | CURATED                                                             | KIAA1549,ZC3HAV1L,ZC3HAV1,TTTC26,UBN2,MKRN1,DDND2A,ADCK2,NDUF82,BRAF               |
| SJLGG042_D | 9          | 1         | 141213431 | -0.161   | -0.257    | CURATED                                                             | WASH1,FOXDA,CBWD1,C9orf66,DOCK8,ARRDC1,C9orf37,EHMT1,CACNA1B,FAM157B               |
| SJLGG042_D | X          | 1         | 155270560 | -0.179   | -0.273    | CURATED                                                             | PLCXD1,GTBP6,PPP2R3B,SHOX,ORFL2,H2AFB2,TMLHE,SPRY3,VAMP7,IL9R                      |

Supplementary Table 7

Structural Variations identified in WGS samples

See glossary of terms below table

| Sample     | ChrA | PosA        | OrientationA | ChrB | PosB        | OrientationB | Type | Usage      | Gene          | Chromosomes              | Tx | Valid CDS | In-Frame CDS | Modified In-Frame CDS | mutA | mutB | Validation Status |
|------------|------|-------------|--------------|------|-------------|--------------|------|------------|---------------|--------------------------|----|-----------|--------------|-----------------------|------|------|-------------------|
| SJLGG001_D | 7    | 140488023 + |              | 7    | 138547083 + |              | INS  | GENIC      | KIAA1549_BRAF | chr7,chr7                |    | 1         | 1            | 1                     | 1    | 10   | 5 VALID           |
| SJLGG002_D | 7    | 140490297 + |              | 7    | 138543819 + |              | INS  | GENIC      | KIAA1549_BRAF | chr7,chr7                |    | 1         | 1            | 1                     | 1    | 10   | 5 VALID           |
| SJLGG003_D | 7    | 140489476 + |              | 7    | 138549568 + |              | INS  | GENIC      | KIAA1549_BRAF | chr7,chr7                |    | 1         | 1            | 1                     | 1    | 5    | 4 VALID           |
| SJLGG004_D | 7    | 140487586 + |              | 7    | 138540757 + |              | INS  | GENIC      | KIAA1549_BRAF | chr7,chr7                |    | 1         | 1            | 1                     | 1    | 2    | 8 VALID           |
| SJLGG005_D | 5    | 140843463 + |              | 6    | 104864174 + |              | CTX  | TRUNCATING | PCDHGB1       | chr5,chr5,chr5,chr5,chr5 |    | 20        | 0            | 0                     | 0    | 6    | 3 VALID           |
| SJLGG005_D | 6    | 104635199 + |              | 6    | 135517619 + |              | DEL  | TRUNCATING | MYB           | chr6                     |    | 4         | 0            | 0                     | 0    | 3    | 1 VALID           |
| SJLGG005_D | 6    | 135517564 + |              | 5    | 140857801 + |              | CTX  | TRUNCATING | MYB           | chr6                     |    | 5         | 0            | 0                     | 0    | 2    | 1 VALID           |
| SJLGG006_D | 8    | 38276282 +  |              | 8    | 38271155 +  |              | INS  | GENIC      | FGFR1_FGFR1   | chr8,chr8                |    | 9         | 9            | 9                     | 9    | 0    | 4 VALID           |
| SJLGG006_R | 8    | 38276282 +  |              | 8    | 38271155 +  |              | INS  | GENIC      | FGFR1_FGFR1   | chr8,chr8                |    | 9         | 9            | 9                     | 9    | 0    | 4 VALID           |
| SJLGG007_D | 7    | 140490794 + |              | 7    | 138548949 + |              | INS  | GENIC      | KIAA1549_BRAF | chr7,chr7                |    | 1         | 1            | 1                     | 1    | 8    | 3 VALID           |
| SJLGG008_D | 8    | 38277106 +  |              | 8    | 38271149 +  |              | INS  | GENIC      | FGFR1_FGFR1   | chr8,chr8                |    | 9         | 9            | 0                     | 0    | 6    | 4 VALID           |
| SJLGG009_D | 7    | 140489200 + |              | 7    | 138541101 + |              | INS  | GENIC      | KIAA1549_BRAF | chr7,chr7                |    | 1         | 1            | 1                     | 1    | 6    | 1 VALID           |
| SJLGG009_D | 7    | 140490605 + |              | 7    | 140504330 - |              | ITX  | TRUNCATING | BRAF          | chr7                     |    | 2         | 0            | 0                     | 0    | 3    | 2 VALID           |
| SJLGG010_D | 7    | 140493176 + |              | 7    | 138539500 + |              | INS  | GENIC      | KIAA1549_BRAF | chr7,chr7                |    | 1         | 1            | 1                     | 1    | 3    | 0 VALID           |
| SJLGG011_D | 7    | 140488668 + |              | 7    | 138543648 + |              | INS  | GENIC      | KIAA1549_BRAF | chr7,chr7                |    | 1         | 1            | 1                     | 1    | 6    | 1 VALID           |
| SJLGG012_D | 7    | 140490512 + |              | 7    | 138552320 + |              | INS  | GENIC      | KIAA1549_BRAF | chr7,chr7                |    | 1         | 1            | 1                     | 1    | 6    | 3 VALID           |
| SJLGG013_D | 7    | 140487437 + |              | 7    | 138550782 + |              | INS  | GENIC      | KIAA1549_BRAF | chr7,chr7                |    | 1         | 1            | 1                     | 1    | 10   | 5 VALID           |
| SJLGG015_D | 7    | 140481674 + |              | 7    | 138543473 + |              | INS  | GENIC      | KIAA1549_BRAF | chr7,chr7                |    | 1         | 1            | 1                     | 1    | 6    | 4 VALID           |
| SJLGG016_D | 7    | 140488340 + |              | 7    | 138547386 + |              | INS  | GENIC      | KIAA1549_BRAF | chr7,chr7                |    | 1         | 1            | 1                     | 1    | 1    | 0 VALID           |
| SJLGG018_D | 6    | 31922345 +  |              | 6    | 31922472 +  |              | DEL  | GENIC      | RDBP_RDBP     | chr6,chr6                |    | 1         | 1            | 1                     | 1    | 0    | 4 PUTATIVE        |
| SJLGG018_D | 8    | 38689182 -  |              | 8    | 38271014 -  |              | ITX  | GENIC      | FGFR1_TACC1   | chr8,chr8                |    | 9         | 9            | 9                     | 9    | 6    | 10 VALID          |
| SJLGG019_D | 3    | 12645604 +  |              | 6    | 163940904 - |              | CTX  | GENIC      | QKI_RAF1      | chr6,chr3                |    | 1         | 1            | 1                     | 1    | 4    | 2 VALID           |
| SJLGG020_D | 7    | 140494106 + |              | 7    | 138537132 + |              | INS  | GENIC      | KIAA1549_BRAF | chr7,chr7                |    | 1         | 1            | 1                     | 1    | 4    | 10 VALID          |
| SJLGG021_D | 7    | 140490562 + |              | 7    | 138548153 + |              | INS  | GENIC      | KIAA1549_BRAF | chr7,chr7                |    | 1         | 1            | 1                     | 1    | 0    | 3 VALID           |
| SJLGG024_D | 7    | 140491304 + |              | 7    | 138540541 + |              | INS  | GENIC      | KIAA1549_BRAF | chr7,chr7                |    | 1         | 1            | 1                     | 1    | 2    | 4 VALID           |
| SJLGG025_D | 7    | 140493649 + |              | 7    | 138547246 + |              | INS  | GENIC      | KIAA1549_BRAF | chr7,chr7                |    | 1         | 1            | 1                     | 1    | 1    | 6 VALID           |
| SJLGG026_D | 3    | 180685038 + |              | 7    | 140483012 - |              | CTX  | GENIC      | FXR1_BRAF     | chr3,chr7                |    | 2         | 2            | 2                     | 2    | 3    | 3 VALID           |
| SJLGG027_D | 7    | 140488746 + |              | 7    | 138548658 + |              | INS  | GENIC      | KIAA1549_BRAF | chr7,chr7                |    | 1         | 1            | 1                     | 1    | 1    | 9 VALID           |
| SJLGG028_D | 7    | 138551226 + |              | 7    | 140493693 + |              | INS  | GENIC      | BRAF_KIAA1549 | chr7,chr7                |    | 2         | 2            | 2                     | 2    | 3    | 6 VALID           |
| SJLGG031_D | 1    | 39757516 -  |              | 7    | 140492181 + |              | CTX  | GENIC      | BRAF_MACF1    | chr7,chr1                |    | 1         | 1            | 1                     | 1    | 0    | 4 VALID           |
| SJLGG031_D | 1    | 39757537 -  |              | 7    | 140492254 - |              | CTX  | GENIC      | MACF1_MACF1   | chr1,chr1                |    | 1         | 1            | 1                     | 0    | 2    | 1 VALID           |
| SJLGG032_D | 7    | 140492951 + |              | 7    | 138541228 + |              | INS  | GENIC      | KIAA1549_BRAF | chr7,chr7                |    | 1         | 1            | 1                     | 1    | 4    | 7 VALID           |
| SJLGG033_D | 8    | 67490866 +  |              | 8    | 89031536 +  |              | INS  | TRUNCATING | MYB1          | chr8                     |    | 2         | 0            | 0                     | 0    | 3    | 0 VALID           |
| SJLGG033_D | 8    | 69654188 +  |              | 8    | 67490578 -  |              | INS  | GENIC      | C8orf34_MYB1  | chr8,chr8                |    | 2         | 2            | 2                     | 2    | 8    | 0 VALID           |
| SJLGG033_D | 8    | 78562383 +  |              | 8    | 89031728 +  |              | DEL  | INTERGENIC |               |                          |    |           |              |                       |      | 5    | 5 VALID           |
| SJLGG033_D | 8    | 78562409 -  |              | 8    | 82753859 +  |              | ITX  | TRUNCATING | SNX16         | chr8                     |    | 1         | 0            | 0                     | 0    | 3    | 4 VALID           |
| SJLGG033_D | 8    | 82753337 +  |              | 8    | 69654563 +  |              | INS  | TRUNCATING | C8orf34       | chr8,chr8                |    | 4         | 3            | 3                     | 0    | 9    | 4 VALID           |
| SJLGG035_D | 6    | 135491705 + |              | 6    | 136884680 + |              | DEL  | TRUNCATING | MAP3K5        | chr6                     |    | 1         | 0            | 0                     | 0    | 7    | 3 VALID           |
| SJLGG035_D | 6    | 135490965 + |              | 8    | 89335432 -  |              | CTX  | TRUNCATING | MMP16         | chr8                     |    | 1         | 0            | 0                     | 0    | 128  | 108 VALID         |
| SJLGG035_D | 6    | 136882615 + |              | 6    | 135495476 + |              | INS  | TRUNCATING | MAP3K5        | chr6                     |    | 1         | 0            | 0                     | 0    | 1    | 107 VALID         |
| SJLGG035_D | 8    | 88417780 -  |              | 6    | 136741489 + |              | CTX  | TRUNCATING | MAP7          | chr6                     |    | 6         | 0            | 0                     | 0    | 1    | 147 VALID         |
| SJLGG038_D | 9    | 14731424 +  |              | 9    | 78562970 +  |              | DEL  | TRUNCATING | PCSK5         | chr9                     |    | 2         | 0            | 0                     | 0    | 8    | 3 PUTATIVE        |
| SJLGG038_D | 9    | 21749091 +  |              | 9    | 22015572 +  |              | DEL  | TRUNCATING | CDKN2B-AS1    | chr9                     |    | 1         | 0            | 0                     | 0    | 5    | 0 VALID           |
| SJLGG038_D | 9    | 22024624 +  |              | 9    | 22025145 +  |              | DEL  | INTRONIC   |               |                          |    |           |              |                       |      | 4    | 6 VALID           |
| SJLGG038_D | 9    | 37804215 +  |              | 9    | 37804296 +  |              | DEL  | INTRONIC   |               |                          |    |           |              |                       |      | 0    | 4 PUTATIVE        |
| SJLGG038_D | 9    | 78559926 +  |              | 9    | 78663080 +  |              | DEL  | GENIC      | PCSK5_PCSK5   | chr9,chr9                |    | 2         | 2            | 0                     | 0    | 4    | 3 PUTATIVE        |
| SJLGG038_D | 9    | 78566224 +  |              | 9    | 116237623 - |              | ITX  | TRUNCATING | PCSK5         | chr9,chr9                |    | 3         | 0            | 0                     | 0    | 8    | 5 PUTATIVE        |
| SJLGG038_D | 9    | 78654643 +  |              | 9    | 36070277 +  |              | INS  | GENIC      | PCSK5_RECK    | chr9,chr9                |    | 1         | 1            | 0                     | 0    | 0    | 11 PUTATIVE       |
| SJLGG038_D | 9    | 78671457 +  |              | 9    | 89348568 +  |              | DEL  | TRUNCATING | PCSK5         | chr9                     |    | 1         | 0            | 0                     | 0    | 5    | 6 PUTATIVE        |
| SJLGG038_D | 9    | 84653505 +  |              | 9    | 78666783 +  |              | INS  | TRUNCATING | PCSK5         | chr9                     |    | 2         | 0            | 0                     | 0    | 7    | 5 PUTATIVE        |
| SJLGG038_D | 9    | 89337633 -  |              | 9    | 78583405 +  |              | ITX  | TRUNCATING | PCSK5         | chr9                     |    | 2         | 0            | 0                     | 0    | 4    | 3 PUTATIVE        |
| SJLGG038_D | 9    | 89340180 +  |              | 9    | 78518260 +  |              | INS  | TRUNCATING | PCSK5         | chr9                     |    | 2         | 0            | 0                     | 0    | 12   | 1 PUTATIVE        |
| SJLGG038_D | 12   | 12018549 +  |              | 15   | 88646889 -  |              | CTX  | GENIC      | ETV6_NTRK3    | chr12,chr15              |    | 3         | 3            | 3                     | 3    | 4    | 6 VALID           |
| SJLGG038_D | 12   | 12018559 -  |              | 15   | 88646886 +  |              | CTX  | GENIC      | NTRK3_ETV6    | chr15,chr12              |    | 1         | 1            | 1                     | 1    | 1    | 2 VALID           |
| SJLGG039_D | 1    | 3643330 -   |              | 11   | 115411715 + |              | CTX  | TRUNCATING | TP73          | chr1                     |    | 6         | 0            | 0                     | 0    | 0    | 3 VALID           |
| SJLGG039_D | 1    | 3643581 +   |              | 11   | 69538645 +  |              | CTX  | TRUNCATING | TP73          | chr1                     |    | 3         | 0            | 0                     | 0    | 0    | 5 VALID           |
| SJLGG039_D | 1    | 3649438 +   |              | 22   | 47557135 -  |              | CTX  | TRUNCATING | TP73          | chr22,chr1               |    | 14        | 2            | 2                     | 0    | 4    | 2 VALID           |
| SJLGG039_D | 1    | 12582471 +  |              | 12   | 103110023 + |              | CTX  | INTERGENIC |               |                          |    |           |              |                       |      | 1    | 3 VALID           |
| SJLGG039_D | 1    | 12584121 +  |              | 11   | 118491727 - |              | CTX  | TRUNCATING | PHLDB1        | chr11                    |    | 2         | 0            | 0                     | 0    | 4    | 5 VALID           |
| SJLGG039_D | 3    | 12649234 +  |              | 3    | 46001511 +  |              | DEL  | GENIC      | FYCO1_RAF1    | chr3,chr3                |    | 1         | 1            | 1                     | 1    | 2    | 3 VALID           |
| SJLGG039_D | 3    | 49168971 +  |              | 11   | 66966686 +  |              | CTX  | TRUNCATING | KDM2A         | chr11,chr3               |    | 3         | 0            | 0                     | 0    | 2    | 2 VALID           |
| SJLGG039_D | 3    | 186716601 + |              | 4    | 1899271 +   |              | CTX  | GENIC      | ST6GAL1_WHSC1 | chr3,chr4                |    | 3         | 3            | 3                     | 0    | 3    | 1 VALID           |
| SJLGG039_D | 4    | 5039611 +   |              | 3    | 183723574 + |              | CTX  | TRUNCATING | ABCC5         | chr3                     |    | 1         | 0            | 0                     | 0    | 0    | 3 VALID           |
| SJLGG039_D | 7    | 9539557 +   |              | 7    | 6300098 +   |              | INS  | TRUNCATING | CYTH3         | chr7                     |    | 1         | 0            | 0                     | 0    | 6    | 4 VALID           |
| SJLGG039_D | 10   | 98887882 +  |              | 16   | 2158836 +   |              | CTX  | GENIC      | PKD1_SLIT1    | chr16,chr10              |    | 1         | 1            | 0                     | 0    | 3    | 0 VALID           |
| SJLGG039_D | 11   | 69540077 +  |              | 1    | 9555182 +   |              | CTX  | INTERGENIC |               |                          |    |           |              |                       |      | 2    | 2 VALID           |
| SJLGG039_D | 11   | 69541460 +  |              | 12   | 103111315 + |              | CTX  | INTERGENIC |               |                          |    |           |              |                       |      | 1    | 3 VALID           |
| SJLGG039_D | 12   | 103110079 - |              | 10   | 95588803 +  |              | CTX  | INTERGENIC |               |                          |    |           |              |                       |      | 3    | 3 VALID           |
| SJLGG039_D | 12   | 103112184 + |              | 3    | 9662023 +   |              | CTX  | INTERGENIC |               |                          |    |           |              |                       |      | 0    | 3 VALID           |
| SJLGG039_D | 12   | 106295961 + |              | 1    | 12581667 +  |              | CTX  | INTERGENIC |               |                          |    |           |              |                       |      | 3    | 2 VALID           |
| SJLGG039_D | 16   | 410315 -    |              | 4    | 5037703 +   |              | CTX  | INTERGENIC |               |                          |    |           |              |                       |      | 1    | 2 VALID           |
| SJLGG039_D | 16   | 2170637 +   |              | 12   | 103110956 - |              | CTX  | TRUNCATING |               |                          |    |           |              |                       |      | 2    | 2 VALID           |
| SJLGG039_D | 16   | 2172065 +   |              | 1    | 1196437 +   |              | CTX  | GENIC      | UBE2J2_PKD1   | chr1,chr16               |    | 8         | 8            | 0                     | 0    | 4    | 2 VALID           |
| SJLGG040_D | 6    | 135107970 + |              | 6    | 135420365 + |              | DEL  | INTERGENIC |               |                          |    |           |              |                       |      | 95   | 94 PUTATIVE       |
| SJLGG040_D | 6    | 135517293 + |              | 6    | 134735463 + |              | INS  | TRUNCATING | MYB           | chr6                     |    | 5         | 0            | 0                     | 0    | 78   | 66 VALID          |
| SJLGG042_D | 7    | 140488760 + |              | 7    | 138540270 + |              | INS  | GENIC      | KIAA1549_BRAF | chr7,chr7                |    | 1         | 1            | 1                     | 1    | 3    | 11 VALID          |

| Column Title | Column Definition                                                                                                           |
|--------------|-----------------------------------------------------------------------------------------------------------------------------|
| Sample       | Sample name                                                                                                                 |
| ChrA         | Chromosome for breakpoint A                                                                                                 |
| PosA         | Position of breakpoint A                                                                                                    |
| OrientationA | + Region to the left of PosA is included in mutant genotype<br>- Region to the right of PosA is included in mutant genotype |
| ChrB         | Chromosome for breakpoint B                                                                                                 |
| PosB         | Position of breakpoint B                                                                                                    |
| OrientationB | + Region to the right of PosA is included in mutant genotype<br>- Region to the left of PosA is included in mutant genotype |
| INS          | Insertion                                                                                                                   |
| DEL          | Deletion                                                                                                                    |

|                   |                       |                                                                                                        |
|-------------------|-----------------------|--------------------------------------------------------------------------------------------------------|
| Type              | INV                   | Inversion                                                                                              |
|                   | ITX                   | Intrachromosomal translocation                                                                         |
|                   | CTX                   | Interchromosomal translocation                                                                         |
|                   | GENIC                 | Both endpoints were in genes: checked for fusion                                                       |
|                   | HALF_INTERGENIC       | One endpoint was in a gene: checked for truncation                                                     |
| Usage             | CO_GENIC              | Both endpoints were in genes: checked for and found fusion that involved multiple events               |
|                   | INTERGENIC / INTRONIC | Neither endpoint was in a gene or both were in the same intron of a gene; no gene fusion or truncation |
|                   | INVERTED_REPEAT       | Both endpoints were in the same gene, but in opposite orientations: checked for truncation             |
| Gene              |                       | Fusion or truncated gene that would result from structural variation                                   |
| Chromosomes       |                       | Chromosomes involved in the rearrangement                                                              |
| Tx                |                       | Number of predicted fusion transcripts                                                                 |
| Valid CDS         |                       | Number of predicted fusion transcripts with an annotated CDS start and stop                            |
| In-Frame CDS      |                       | Number of "Valid CDS" transcripts with a CDS length divisible by three.                                |
| Mod. In-Frame CDS |                       | Number of "In-Frame CDS" transcripts that are not identical to an existing annotated transcript.       |
| mutA              |                       | Number of reads supporting the structural variation at breakpoint A                                    |
| mutB              |                       | Number of reads supporting the structural variation at breakpoint B                                    |
| Validation Status | Valid                 | The SV has been experimentally validated                                                               |
|                   | Putative              | The SV has yet to be validated                                                                         |



Supplementary Table 8

Non-silent SNVs and indels identified in tumor series 1 & 2

All variants are validated somatic mutations, except for the NF1 germline truncation mutations (one splice variation and one nonsense mutation - yellow highlights). The column definition is the same as Supplementary Table 5. The two additional columns, 'SIFT Result' and 'PPH2 Result', refer to 'deleterious status' assigned by SIFT and 'deleterious status' assigned by polyPHEN2, respectively. The origin of one novel non-silent variant, *TMPRSS1E90A*, which was found in tumor SJLGG001259\_D in recurrence screening, cannot be determined due to lack of matching normal sample.

| Cohort     | Gene      | Sample         | Chromosome | Position  | Class      | AA Change       | Protein ID | mRNA Accession         | SIFT Result       | PPH2 Result       | Reference | Non-reference/Genotype            | Flanking Region                                   |                                                |
|------------|-----------|----------------|------------|-----------|------------|-----------------|------------|------------------------|-------------------|-------------------|-----------|-----------------------------------|---------------------------------------------------|------------------------------------------------|
| Discovery  | NEURL4    | SJLGG004_D     | 17         | 7221962   | MISSENSE   | T1239M          |            | 53829370 NM_032442     | DELETERIOUS       | POSSIBLY_DAMAGING | G         | A                                 | G/A                                               | GGATGGTGCCTTCAGGGCCAG[G/A]TGTCAGCATGGGCCAAAC   |
| Discovery  | DSG1      | SJLGG008_D     | 18         | 28914016  | MISSENSE   | N286Y           |            | 119703744 NM_001942    | DELETERIOUS       | POSSIBLY_DAMAGING | A         | T                                 | A/T                                               | AAGAAAATACTCTAAATTC[A/T]ATTTCGCGAGATTAGAGTA    |
| Discovery  | FLT1      | SJLGG008_D     | 13         | 29041677  | MISSENSE   | T48A            |            | 156104876 NM_002019    | DELETERIOUS       | PROBABLY_DAMAGING | T         | C                                 | T/C                                               | CCTGCATTGGAGATGCAGT[G/T]CTGGCCCTTGCATGATGT     |
| Discovery  | FLT1      | SJLGG008_D     | 13         | 29041734  | MISSENSE   | L29I            |            | 156104876 NM_002019    | DELETERIOUS       | POSSIBLY_DAMAGING | A         | T                                 | A/T                                               | ACTCAGTTCAGGATCTTTTA[A/T]TTTTGAACCTGAACATAGATC |
| Discovery  | EP300     | SJLGG009_D     | 22         | 41564765  | NONSENSE   | R1356*          |            | 50345997 NM_001429     |                   |                   | C         | T                                 | C/T                                               | TGGCAGAATCCTTCCATAC[C/T]GAACCAAAGCCCTCTTTGCC   |
| Discovery  | NSMAF     | SJLGG010_D     | 8          | 59498262  | MISSENSE   | V870I           |            | 31543297 NM_003580     | TOLERATED         | BENIGN            | C         | T                                 | C/T                                               | TGCTCCAAGGAGTCCCAA[C/T]GAGCAGTTCACCAGACTGAC    |
| Discovery  | PRIC285   | SJLGG010_D     | 20         | 62197125  | MISSENSE   | A1017V          |            | 156105693 NM_001037335 | TOLERATED         | BENIGN            | G         | A                                 | G/A                                               | CTGCCGAGCCTCCGTC[G/A]CTGTGGTTCGCCGTGATGTCA     |
| Discovery  | KIAA1239  | SJLGG012_D     | 4          | 37447119  | MISSENSE   | N1170T          |            | 222418587 NM_001144990 | TOLERATED         | BENIGN            | A         | C                                 | A/C                                               | AGGAAGTCTTTCTGTTGGG[A/C]TACTGAGACATTCACGCC     |
| Discovery  | ATRX      | SJLGG015_D     | X          | 76937777  | MISSENSE   | E991K           |            | 20336209 NM_000489     | TOLERATED         | BENIGN            | C         | T                                 | C/T                                               | GTCTGAAGGTTCTTTT[T/C]TTCAGTCCCTTTTGTCT         |
| Discovery  | RINT1     | SJLGG015_D     | 7          | 105189134 | MISSENSE   | R325W           |            | 62899047 NM_021930     | DELETERIOUS       | PROBABLY_DAMAGING | C         | T                                 | C/T                                               | GGTATCACTTCAGAGGGA[C/T]GGCAGACTAATGTGTTAAGC    |
| Discovery  | TMPRSS11D | SJLGG018_D     | 4          | 68725389  | MISSENSE   | R6S             |            | 4785808 NM_004262      | TOLERATED         | POSSIBLY_DAMAGING | G         | T                                 | G/T                                               | TCTTGAAGTCGAAGTACAC[G/T]TCTGGCTTACAAAGAGAGA    |
| Discovery  | TFDP1     | SJLGG019_D     | 13         | 114287557 | MISSENSE   | A144V           |            | 6005900 NM_007111      | DELETERIOUS       | POSSIBLY_DAMAGING | C         | T                                 | C/T                                               | AGTGGCAGACGAGCTGTT[G/C]TGGAGTTCAGTGTGCCGACA    |
| Discovery  | NF1       | SJLGG022_D     | 17         | 29665754  | FRAMESHIFT | T2263_Y2264fs   |            | 4557793 NM_000267      |                   |                   | TTAC      | ----                              | TTAC/----                                         | GACCTGACAC[TTAC>----]AACAGTCAAG                |
| Discovery  | NF1       | SJLGG022_D     | 17         | 29664899  | splice     | R2214_E43splice |            | 4557793 NM_000267      | -                 | -                 | G         | A                                 | G/A                                               | TGGACAGAAGTCTCAAAG[G/A]TATGTCCTAAATTAATATA     |
| Discovery  | LETM1     | SJLGG024_D     | 4          | 1821068   | MISSENSE   | S580R           |            | 6912482 NM_012318      | TOLERATED         | POSSIBLY_DAMAGING | G         | T                                 | G/T                                               | GAGCAATCCCACCACCTC[G/T]CTGTAGCTGCACATCCTC      |
| Discovery  | NDUFB2    | SJLGG027_D     | 7          | 140402788 | NONSENSE   | W74*            |            | 4758778 NM_004546      |                   |                   | G         | A                                 | G/A                                               | CTGATTCTCTGGCGCTTT[G/A]GCATGACTCAGAAGAGTGC     |
| Discovery  | SPHK1     | SJLGG027_D     | 17         | 74382128  | MISSENSE   | G111S           |            | 217272880 NM_182965    | TOLERATED         | PROBABLY_DAMAGING | G         | A                                 | G/A                                               | TGGTCTGCTGAACCCGGG[C/G]TACTGAGGAGGCAAGCCCTTG   |
| Discovery  | BRAF      | SJLGG029_D     | 7          | 140453136 | MISSENSE   | V600E           |            | 33188459 NM_004333     | DELETERIOUS       | BENIGN            | A         | T                                 | A/T                                               | ACCCACTCCATCGAGATTT[C/A]TCTGTAGCTAGACCAAAATCA  |
| Discovery  | BRAF      | SJLGG030_D     | 7          | 140453136 | MISSENSE   | V600E           |            | 33188459 NM_004333     | DELETERIOUS       | BENIGN            | A         | T                                 | A/T                                               | ACCCACTCCATCGAGATTT[C/A]TCTGTAGCTAGACCAAAATCA  |
| Discovery  | ADAMTS9   | SJLGG033_D     | 3          | 64633620  | MISSENSE   | G569A           |            | 33624896 NM_182920     | PROBABLY_DAMAGING |                   | C         | G                                 | C/G                                               | ACAGGGCATTACTGCCTTT[C/G]CAGGCTCCGACTCCGCCA     |
| Discovery  | CHD2      | SJLGG034_D     | 15         | 93567613  | MISSENSE   | D1722V          |            | 118421089 NM_001271    | DELETERIOUS       | PROBABLY_DAMAGING | A         | T                                 | A/T                                               | CTATTTCAAGCACCATCATG[A/T]TCTCAAAGCGGAGAGATCCG  |
| Discovery  | CIC       | SJLGG034_D     | 19         | 42794946  | FRAMESHIFT | V676_R677fs     |            | 112421108 NM_015125    |                   |                   | GTGCG     | ----                              | GTGCG/----                                        | CACCAATGT[GTCG>-----]GCCTGTCAAG                |
| Discovery  | CIC       | SJLGG034_D     | 19         | 42795096  | MISSENSE   | S726R           |            | 112421108 NM_015125    | DELETERIOUS       | BENIGN            | A         | C                                 | A/C                                               | GGGGCTCCCCGCTGGTGT[C/A]CCTTACTGTATTCGGACAAG    |
| Discovery  | IDH1      | SJLGG034_D     | 2          | 209113112 | MISSENSE   | R132H           |            | 28178825 NM_005896     | DELETERIOUS       | PROBABLY_DAMAGING | C         | T                                 | C/T                                               | CTTGATCCCCATAAGCATG[A/C]TGCCTATGATAGGTTTT      |
| Discovery  | STYK1     | SJLGG034_D     | 12         | 10783793  | MISSENSE   | P101L           |            | 222352145 NM_018423    | TOLERATED         | BENIGN            | G         | A                                 | G/A                                               | CCTGCAGCTTAGCCAGGGCA[G/A]GTGTGGTAGCTCCCAAGAA   |
| Discovery  | DCTN1     | SJLGG035_D     | 2          | 74600063  | NONSENSE   | R149*           |            | 13259510 NM_004082     |                   |                   | G         | A                                 | G/A                                               | CTGTTTTCTCACCTGGGT[C/G]CAGAGTGTGGTCTGGACAG     |
| Discovery  | BRAF      | SJLGG036_D     | 7          | 140453136 | MISSENSE   | V600E           |            | 33188459 NM_004333     | DELETERIOUS       | BENIGN            | A         | T                                 | A/T                                               | ACCCACTCCATCGAGATTT[C/A]TCTGTAGCTAGACCAAAATCA  |
| Discovery  | H3F3A     | SJLGG037_D     | 1          | 226252135 | MISSENSE   | K28M            |            | 4504279 NM_002107      | DELETERIOUS       | BENIGN            | A         | T                                 | A/T                                               | GGCTACAAAGCCGCTCGCA[A/T]GAGTGGCCCTCTACTGGAG    |
| Discovery  | C3orf30   | SJLGG038_D     | 3          | 118865071 | FRAMESHIFT | P12fs           |            | 282847424 NM_152539    |                   |                   | -----     | GGCTGAA[-----]GGCTGAA[C]CCTTGAACA |                                                   |                                                |
| Discovery  | MKI67     | SJLGG040_D     | 10         | 129904112 | NONSENSE   | R1998*          |            | 103472005 NM_002417    |                   |                   | G         | A                                 | G/A                                               | CCCCAAGGATACCTGAGT[C/G]ATTGCTGGAGCTGTTGGGG     |
| Discovery  | SCN3A     | SJLGG040_D     | 2          | 166003458 | MISSENSE   | A488S           |            | 126362947 NM_001081676 | TOLERATED         | BENIGN            | C         | A                                 | C/A                                               | TTTGAAGTCAACTTTGAT[C/A]TCTGGAAGAACTTCCAAACA    |
| Discovery  | CDK13     | SJLGG042_D     | 7          | 40118378  | MISSENSE   | R986H           |            | 145309302 NM_003718    | DELETERIOUS       | PROBABLY_DAMAGING | G         | A                                 | G/A                                               | TGCCTTGGACTCTAGTAAG[C/A]CTGCAGCTGTGAACAGGCTC   |
| Recurrence | BRAF      | SJLGG001209_D1 | 7          | 140453136 | MISSENSE   | V600E           |            | 33188459 NM_004333     | DELETERIOUS       | BENIGN            | A         | T                                 | A/T                                               | TCGAGATTT[C/A]TCTGTAGCTAG                      |
| Recurrence | BRAF      | SJLGG001211_D1 | 7          | 140453136 | MISSENSE   | V600E           |            | 33188459 NM_004333     | DELETERIOUS       | BENIGN            | A         | T                                 | A/T                                               | TCGAGATTT[C/A]TCTGTAGCTAG                      |
| Recurrence | BRAF      | SJLGG001243_D1 | 7          | 140453136 | MISSENSE   | V600E           |            | 33188459 NM_004333     | DELETERIOUS       | BENIGN            | A         | T                                 | A/T                                               | TCGAGATTT[C/A]TCTGTAGCTAG                      |
| Recurrence | BRAF      | SJLGG001262_D1 | 7          | 140477800 | PROTEININS | G503>EYSG       |            | 33188459 NM_004333     | -                 | -                 | -----     | CTGAGTACT                         | ACAAGCTCACCTGAGTACT[-----]CTGAGTACT]CCTACTTCAT    |                                                |
| Recurrence | BRAF      | SJLGG001266_D1 | 7          | 140453136 | MISSENSE   | V600E           |            | 33188459 NM_004333     | DELETERIOUS       | BENIGN            | A         | T                                 | A/T                                               | TCGAGATTT[C/A]TCTGTAGCTAG                      |
| Recurrence | BRAF      | SJLGG001269_D1 | 7          | 140453136 | MISSENSE   | V600E           |            | 33188459 NM_004333     | DELETERIOUS       | BENIGN            | A         | T                                 | A/T                                               | TCGAGATTT[C/A]TCTGTAGCTAG                      |
| Recurrence | BRAF      | SJLGG001271_D1 | 7          | 140453136 | MISSENSE   | V600E           |            | 33188459 NM_004333     | DELETERIOUS       | BENIGN            | A         | T                                 | A/T                                               | TCGAGATTT[C/A]TCTGTAGCTAG                      |
| Recurrence | BRAF      | SJLGG001273_D1 | 7          | 140453136 | MISSENSE   | V600E           |            | 33188459 NM_004333     | DELETERIOUS       | BENIGN            | A         | T                                 | A/T                                               | TCGAGATTT[C/A]TCTGTAGCTAG                      |
| Recurrence | BRAF      | SJLGG001277_D1 | 7          | 140453136 | MISSENSE   | V600E           |            | 33188459 NM_004333     | DELETERIOUS       | BENIGN            | A         | T                                 | A/T                                               | TCGAGATTT[C/A]TCTGTAGCTAG                      |
| Recurrence | BRAF      | SJLGG001281_D1 | 7          | 140453136 | MISSENSE   | V600E           |            | 33188459 NM_004333     | DELETERIOUS       | BENIGN            | A         | T                                 | A/T                                               | TCGAGATTT[C/A]TCTGTAGCTAG                      |
| Recurrence | BRAF      | SJLGG001284_D1 | 7          | 140453136 | MISSENSE   | V600E           |            | 33188459 NM_004333     | DELETERIOUS       | BENIGN            | A         | T                                 | A/T                                               | TCGAGATTT[C/A]TCTGTAGCTAG                      |
| Recurrence | FGFR1     | SJLGG001213_D1 | 8          | 38273561  | MISSENSE   | V559M           |            | 13186251 NM_015850     | DELETERIOUS       | PROBABLY_DAMAGING | C         | T                                 | C/T                                               | GCATACCTCC[C/T]GATGACATC                       |
| Recurrence | FGFR1     | SJLGG001213_D1 | 8          | 38274849  | MISSENSE   | N544K           |            | 13186251 NM_015850     | DELETERIOUS       |                   | G         | T                                 | G/T                                               | CCCCAGCAG[G/T]TTGATGATAT                       |
| Recurrence | FGFR1     | SJLGG001259_D1 | 8          | 38274849  | MISSENSE   | N544K           |            | 13186251 NM_015850     | DELETERIOUS       |                   | G         | C                                 | G/C                                               | CCCCAGCAG[G/T]TTGATGATAT                       |
| Recurrence | KRAS      | SJLGG001259_D1 | 12         | 25398284  | MISSENSE   | G12D            |            | 15718763 NM_003360     | DELETERIOUS       | POSSIBLY_DAMAGING | C         | T                                 | C/T                                               | GCCTACGCCA[C/T]CAGCTCCAAC                      |
| Recurrence | NF1       | SJLGG001259_D1 | 17         | 29552226  | FRAMESHIFT | T653fs          |            | 4557793 NM_000267      | -                 | -                 | -----     | TACGTAC                           | -----TACGGAAGAATACTACGTAC[-----]TACGTAC]CCTGGAGCC |                                                |
| Recurrence | NF1       | SJLGG001267_D1 | 17         | 29653227  | FRAMESHIFT | N1721fs         |            | 4557793 NM_000267      | -                 | -                 | A         | -                                 | A/-                                               | GGTATCCACA[A/-]TGCTCTCAA                       |
| Recurrence | NF1       | SJLGG001225_D1 | 17         | 29548939  | nonsense   | W571*           |            | 4557793 NM_000267      | -                 | -                 | G         | A                                 | A/A                                               | AAACATTTT[G/G]GAGATTAGGT                       |

## Supplementary Table 9

### Significantly mutated gene analysis for mutations identified in tumors from series 1 and 2

Only non-silent mutations are included in the analysis using the MuSiC package.

Significantly mutated genes that pass the FDR test (<0.2) are shown in bold letters. Only *BRAF*, *NF1*, *H3F3A*, and *FGFR1* are mutated in more than one tumor.

| #Gene               | Indels | SNVs | # Mutations | #Cases | P-value         |                 |                 | FDR            |                 |                 |
|---------------------|--------|------|-------------|--------|-----------------|-----------------|-----------------|----------------|-----------------|-----------------|
|                     |        |      |             |        | FCPT            | LRT             | CT              | FCPT           | LRT             | CT              |
| <b><i>BRAF</i></b>  | 1      | 12   | 13          | 14     | 0               | 0               | 0               | 0              | 0               | 0               |
| <b><i>NF1</i></b>   | 3      | 1    | 4           | 4      | <b>3.52E-06</b> | <b>8.05E-11</b> | <b>1.05E-10</b> | <b>0.04087</b> | <b>9.34E-07</b> | <b>1.21E-06</b> |
| <b><i>H3F3A</i></b> | 0      | 2    | 2           | 2      | <b>8.48E-04</b> | <b>5.55E-09</b> | <b>7.42E-08</b> | 1              | <b>4.29E-05</b> | <b>0.00057</b>  |
| <b><i>FGFR1</i></b> | 0      | 3    | 3           | 2      | <b>3.09E-03</b> | <b>7.51E-07</b> | <b>8.88E-07</b> | 1              | <b>0.00436</b>  | <b>0.00515</b>  |
| <b><i>FLT1</i></b>  | 0      | 2    | 2           | 1      | <b>1.25E-02</b> | <b>4.92E-06</b> | <b>4.39E-06</b> | 1              | <b>0.02283</b>  | <b>0.02038</b>  |
| <b><i>CIC</i></b>   | 1      | 1    | 2           | 1      | <b>3.53E-02</b> | <b>2.76E-05</b> | <b>2.03E-05</b> | 1              | <b>0.09140</b>  | <b>0.07841</b>  |
| <i>KRAS</i>         | 0      | 1    | 1           | 1      | 0.27166         | 0.00012         | 0.00019         | 1              | 0.35616         | 0.61268         |
| <i>TMPRSS11D</i>    | 0      | 1    | 1           | 1      | 0.29479         | 0.00015         | 0.00033         | 1              | 0.35616         | 0.73804         |
| <i>LETM1</i>        | 0      | 1    | 1           | 1      | 0.42150         | 0.00043         | 0.00035         | 1              | 0.59021         | 0.73804         |
| <i>IDH1</i>         | 0      | 1    | 1           | 1      | 0.41710         | 0.00042         | 0.00190         | 1              | 0.52499         | 1               |
| <i>STYK1</i>        | 0      | 1    | 1           | 1      | 0.37987         | 0.00031         | 0.00121         | 1              | 0.52125         | 1               |
| <i>SPHK1</i>        | 0      | 1    | 1           | 1      | 0.66326         | 0.00229         | 0.00363         | 1              | 1               | 1               |
| <i>ADAMTS9</i>      | 0      | 1    | 1           | 1      | 0.67955         | 0.00247         | 0.00429         | 1              | 1               | 1               |
| <i>ATRX</i>         | 0      | 1    | 1           | 1      | 0.77079         | 0.00463         | 0.00749         | 1              | 1               | 1               |
| <i>DSG1</i>         | 0      | 1    | 1           | 1      | 0.73624         | 0.00381         | 0.00872         | 1              | 1               | 1               |
| <i>NSMAF</i>        | 0      | 1    | 1           | 1      | 0.67769         | 0.00251         | 0.01055         | 1              | 1               | 1               |
| <i>EP300</i>        | 0      | 1    | 1           | 1      | 0.75161         | 0.00421         | 0.01143         | 1              | 1               | 1               |
| <i>CDK13</i>        | 0      | 1    | 1           | 1      | 0.77343         | 0.00497         | 0.01676         | 1              | 1               | 1               |
| <i>TFDP1</i>        | 0      | 1    | 1           | 1      | 0.78217         | 0.00537         | 0.01827         | 1              | 1               | 1               |
| <i>DCTN1</i>        | 0      | 1    | 1           | 1      | 0.79062         | 0.00569         | 0.02513         | 1              | 1               | 1               |
| <i>CHD2</i>         | 0      | 1    | 1           | 1      | 0.89086         | 0.01393         | 0.04679         | 1              | 1               | 1               |
| <i>NEURL4</i>       | 0      | 1    | 1           | 1      | 0.90382         | 0.01612         | 0.04855         | 1              | 1               | 1               |
| <i>PRIC285</i>      | 0      | 1    | 1           | 1      | 0.92910         | 0.02223         | 0.05555         | 1              | 1               | 1               |

FCPT: Fisher's combined P-value test

CT: Convolution test

LRT: Likelihood ratio test.

## Supplementary Table 10

### *WHO classification of low-grade gliomas and low-grade glioneuronal tumors in this study cohort*

| Low-grade gliomas               |       |                     |       | Low-grade glioneuronal tumors          |       |
|---------------------------------|-------|---------------------|-------|----------------------------------------|-------|
| circumscribed *                 |       | diffuse *           |       |                                        |       |
| diagnosis                       | grade | diagnosis           | grade | diagnosis                              | grade |
| <b>pilocytic astrocytoma</b>    | I     | <b>astrocytoma</b>  | II    | <b>ganglioglioma</b>                   | I     |
| pilomyxoid astrocytoma          | II    | oligodendroglioma   | II    | desmoplastic infantile ganglioglioma   | I     |
|                                 |       | oligoastrocytoma    | II    | dysembryoplastic neuroepithelial tumor | I     |
| pleomorphic xanthoastrocytoma § | n/a   | angiocentric glioma | I     |                                        |       |

\* architectural arrangement by radiology and pathology

§ has a glioneuronal immunophenotype

n/a - not assigned

Tumors in **bold** are relatively common.

**Supplementary Table 11a**

**Primers for Tier 1 non-silent Single Nucleotide Variation validation**

| Primer Name | Primer Sequence (Forward)  | Primer Sequence (Reverse)  |
|-------------|----------------------------|----------------------------|
| GPX1        | TCTCGAAGAGCATGAAGTTGGGCTC  | TTATCGAGAATGTGGCGTCCCCTCTG |
| NEURL4      | AGGTCACAGGAGCTGGGCTAGAAGG  | ACCAGGCCTGTGAGTAGAGAAGGGC  |
| USP6        | TTCTTCTCTCCCGAAGTGCTGACT   | TGTCTCTCAGGATCCTCCTGGGTT   |
| DSG1        | ATGTCAGCGGAATGTGAGTG       | CCAATTTCTTCATTTCCAGA       |
| FLT1-T48A   | ACTATTTGGGCATCCCTTCC       | AGTTTAAAAGGCACCCAGCA       |
| FLT1-L29I   | CTGCATTGGAGATGCAGTGT       | ATGAAATTCAGAGCCCAGGA       |
| KCNT1       | GTCCCTGAGTCTCTCAGCCTTGGT   | CAGTCCACCTAGATGGTCCACCCTG  |
| EP300       | CTGAGGCGACAGAATCACCCCTGAGT | GTGGAGGGCAGTCAGAGCCATACTC  |
| SOX1        | ATGATGATGGAGACCGACCTGCACT  | TCATGTAGCCCTGCGAGTTGGAGAT  |
| NSMAF       | AGGCTCCAGGGACATGTTTACGACA  | TGTGTTGCAGATAGTCGCCATGTCC  |
| PRIC285     | AGGTCTCTGGCACGAAAGAGCAGTG  | TCTGGGAGAGCTTCATCCGTGAGTG  |
| PRRG2       | GTTCACTGCAGCCTCAATTTCTGG   | CTCGAAAGCAGCTCTTCAGTGAGGC  |
| LPHN1       | CTGGTGGGAAACCTGTCTGTGAAC   | ACCGGGCCGAGATTGAACTTCTCTA  |
| KIAA1239    | TGCTCCCTGGATGGTCTGTATGCTT  | TGAAAGCTCAATGCTGACCACCTCA  |
| HRNR        | AGAAGAGTGACCCGAGCGAGACTCA  | GCAACATGGTTCTGCATCAGGACAG  |
| PDZD4       | GTGATGTCGGTCTGAGTGCCACTGT  | GCTGCAGACAGCAGATTCTTGCTT   |
| CDK10       | CACCTGGAGGACCTTCTTACCTGGG  | GAACTCTGGGACTGTCGTTCCCG    |
| CDK10       | CACCTGGAGGACCTTCTTACCTGGG  | GAACTCTGGGACTGTCGTTCCCG    |
| ATP8B3      | CTTGATCATGTTGATGTCGTTGGCA  | AACGGAGACTTCCTGGTCAGTGTCG  |
| ATRX        | TCCTTTCCCTGTTGACTTCTCAGCAT | TGATGGTGTGATAAGCTTTCTGGGA  |
| CC2D1A      | TGCAGTCCCTTATCCTTCTCCACC   | CCACCAGATATGCATCCCTGAGCAC  |
| RINT1       | GCCTAGGCACGTCTCAAATCCTGT   | TCAGCAATATCTGATGCCCAAGAGC  |
| TMPRSS11D   | GAGCTATGGTGACTGCCAGGA      | GGCAGAAAGGAAAGCAACTCC      |
| TFDP1       | ACGGCATTCTCCATGAAGGT       | GTGGGCATTTGTGATTTCTG       |
| NF1         | GCTACCAAGATCACCATAGCATGA   | CTTTCTTTAGCACTGATGAGACC    |
| LETM1       | GGGCAACAGAGCAAGACCTTC      | AGGAAATCGACATCCTCAGCG      |
| NDUFB2      | ACGCTGTCTGCCATGTTGTTT      | CCTGCCTGGTGACAGAGTGAA      |
| SPHK1       | GTGGACGATCGGGAGAAACAT      | GTGAGCATCAGCGTGAAGGAG      |
| DCTN1       | TGCTCATACACGTGCCCTCAT      | TGGACTTCTGGGATTTCTGGG      |
| CIC         | ACTGGGCTCAGGAACCTTCAA      | CTGGCACCTGCTGTGTCATTT      |
| CIC         | ACATCCTGCAGACACTGGTGC      | GGGTGCCACCAGTAGGTTAGT      |
| CHD2        | GGCTGGGTCCAGGAATATGGT      | TAATGGTCTGAGGGTCCCTGG      |
| BAI3        | TCCCACTCTCGCTTTGCATTA      | GCTAAGGAGGAGACGAACCCA      |
| C3orf30     | GCCTCTTTCTCACACTGCG        | CTTCTTTTCGGCCTGGTTCTT      |
| BRAF        | ACTCAGCAGCATCTCAGGGC       | GGAAAGCATCTCACCTCATCC      |
| OTC         | GGGAAGGAGACGCGATATTGA      | CCTGGTAACTTGGAAAGCCT       |
| ADAMTS9     | ATAGCTTTCCAGTGCCATCCC      | TTGAGCAGATGCAGTGACAGAC     |
| CDK13       | TGTTTGGTTTGGTGCTTACGTG     | TCACTTACTCTGGTGGAGGCA      |
| MKI67       | AAGCCGGCCAGGTCTTCTAGT      | AGCAAGAGACGGCCACAAACT      |
| SCN3A       | TGACGCTGTCTTCAGATTCCGG     | GATAAGCAACCACCACGAAGAA     |
| STYK1       | TCTCAATGTTCCGAAAGCCTG      | CCTTGCCAATTTGTTTCAGGG      |
| AIM1L       | CTTTTGGGGTGGTGGACAAG       | ATGTCCCTGTCTCCCCTTT        |
| FGFR1-D623A | ATACACCGAGCCCTGGCAGCCA     | TGCCAGGGCTCGGTGTATGCA      |

Supplementary Table 11b

Primers for structural variant analysis

| Sample ID #          | Primer Name                                                   | Primer Sequence (Forward)  | Primer Sequence (Reverse)  |
|----------------------|---------------------------------------------------------------|----------------------------|----------------------------|
| All samples screened | KIAA1549 Ex.10 / BRAF Ex.12                                   | GGTGGTGATGGTGATTGTTG       | AGGCTTGTAACTGCTGAGGTG      |
| All samples screened | SRGAP3 Ex.9 / RAF1 Ex.12                                      | ATGCCACCATGCAGACATTA       | CATTCCCTGAGCCGCTG          |
| All samples screened | FGFR1 Ex.18 / FGFR1 Ex.10                                     | CATGCCCTGGACCAGTA          | TCTCGGGAAGCTCATACTCA       |
| All samples screened | QKI Ex.1 / RAF1 Ex. 14                                        | GCAGCTGATGAACGACAAGA       | AGAACCCTCCAGCGTGACT        |
| All samples screened | FXR1 Ex.4 / BRAF Ex.14                                        | CAAGAGCAAATGACCAAGAGC      | GGATGATTGACTTGGCGTGT       |
| All samples screened | ETV6 Ex.1 / NTRK3 Ex. 18                                      | TGTCTGACACTCCTGCTCAGTG     | GTAGATTGGGGTGGCCTTC        |
| SJLGG0048            | MYB Ex.6 / MAML2 Ex.4                                         | CTCCGGCTACAGCTCAACTC       | GCCTTGACAAATGTCGGTTT       |
| SJLGG0047            | MYB Ex.9 / QKI Ex. 6                                          | GAACCACACATGCAGCTACC       | TGTCTGATCAAAGGCATTATGG     |
| SJLGG0047            | QKI Ex. 2 / MYB Ex. 16                                        | CCTGATGCTGTGGGACCTAT       | CGAGCTTGACTGGAAGATGTC      |
| SJLGG0055            | MYB Ex.9 / PCDH Ex. 3                                         | GAACCACACATGCAGCTACC       | TGCAGCATCTCTGTGTCAA        |
| SJLGG0005            | MYB Ex.9 / PCDH Ex. 3                                         | GAACCACACATGCAGCTACC       | TGCAGCATCTCTGTGTCAA        |
| SJLGG0046            | MYB Ex.9 / PCDH Ex. 2                                         | GAACCACACATGCAGCTACC       | CTCTGGCCCTGAGAGAAACG       |
| SJLGG0040            | MYB Ex. 9 / LOC154092 Ex.2                                    | CACCAGACCTCATGGAGACA       | GCACCTCTCCCTGCTGTAA        |
| SJLGG0019            | QKI Ex. 2 / RAF1 Ex. 9                                        | CCTGATGCTGTGGGACCTAT       | GCTACTGGACAGGCTGAAG        |
| SJLGG0026            | FXR1 Ex.12-13 / BRAF Ex.11                                    | AGCTGCGACAGATTGGTTCT       | CTCGAGTCCCGTCTACCAAG       |
| SJLGG0018            | FGFR1 Ex. 18 / TACC1 Ex. 12                                   | CATGCCCTGGACCAGTA          | GAGCTGCACTCTCAGCCTTT       |
| SJLGG1212            | FGFR1 Ex. 17 / TACC1 Ex. 7                                    | GTGTCTGCTGACTCCAGTGC       | GAGCTGCACTCTCAGCCTTT       |
| SJLGG001264          | FGFR1 Ex. 19 / TACC1 Ex. 8                                    | AGC CCA GTA ACT GCA CCA AC | TCT TGT CTG ATT CGC TGA GG |
| SJLGG001206          | FGFR3 Ex.17 / TACC3 Ex. 4                                     | AGG AGC TCT TCA AGC TGC TG | GCG CCA TCA GAT ACA TCAA   |
| SJLGG0038            | ETV6 Ex. 3 / NTRK3 Ex. 14                                     | AAAGCTCTCCTGCTGCTGAC       | AGTTCTCGCTTCAAGCAGAT       |
| SJLGG0038            | NTRK3 Ex. 10 / ETV6 Ex.5                                      | CTCATTGCCAAAACCCACT        | CTGGTGGTTGTTCTCCTGGT       |
| SJLGG061             | NAV1 Ex. 15-16 / NTRK2 Ex. 11                                 | CCG AGG AGA AGG ACA CTG AG | ACA GTG AAT GGA ATG CAC CA |
| SJLGG0039            | ST6GAL1 Ex1-2 / WHSC1 Ex.4                                    | AGCAAGGGGAGAGCCAGT         | GGGGTAGTGTAGGGGGTGT        |
| SJLGG0033            | MYBL Ex.8-9 / Chr.8 (reverse complemented)                    | CCATCACAGCTGGAAGTTT        | CTCCAGGC AACGTC AAGATT     |
| SJLGG0033            | SNX16 Chr.8 / C8orf34 Chr.8 <sup>9</sup>                      | CCGTTCTTACAGCTTACAGG       | AGAGGGGCTGCTTACACAGA       |
| SJLGG0033            | SNX16 Chr.8 / Chr. 8                                          | GGTCGAACTGTGCCTGGTAT       | AAGCAAGGACCTGAGGAACA       |
| SJLGG0033            | PKIA Chr.8 / DCAF4L2 Chr.8 <sup>9</sup>                       | TTCGACCGAGGAGTCATACC       | ACTGATGCATGCGTACCAAA       |
| SJLGG0033            | C8orf34 Chr.8 / MYBL1 Chr.8 <sup>9</sup>                      | GACTGTAGTCACCTGTTGTGC      | GGAACAGAACAGAGCCCTCA       |
| SJLGG0054            | MYB Ex.9 / ESR1 Int. (reverse complemented)                   | GAACCACACATGCAGCTACC       | GTATTGGCAAATGGGGTTTG       |
| SJLGG0054            | MYB Int. 14 / ESR1 Int. 5 <sup>9</sup> (reverse complemented) | GCGAGACCCTGTCTTACCA        | ACCTGGCCATCAGTTCTTA        |
| SJLGG0039            | TP73 Chr.1 / TBC1D22A Chr.22                                  | GTGTGGCCAGACCTCCAG         | TCAATACATGCCCTTGTGAAA      |
| SJLGG0039            | TP73 Chr. 1 / Chr11 <sup>9</sup>                              | GATGGGTAGATAATAATGGGGG     | TGTTAACAGCAGGGATACTGAGA    |
| SJLGG0039            | UBE2J2 Chr.1 / PKD1 Chr. 16                                   | CCGGTGCCTTACATCTGTG        | GGTCAAGGCTCTCGTCACTC       |
| SJLGG0039            | PKD1 / SLIT1 <sup>9</sup>                                     | AAGAAAGCACAGCGGAGAA        | CCTACGCCTGGTACTTCTCG       |
| SJLGG0035            | MYB 3'UTR / MMP16                                             | TTGATGAGACCACTGCCATC       | CATAGCTTTGGGCCCTTATG       |
| SJLGG0035            | MYB Ex.14 / MMP16 <sup>9</sup>                                | CTGCTCACACCACTGGGAAG       | CGGCAATAGCTTTACGAGT        |
| SJLGG0035            | MAP3K5 Chr.6 / MYB promoter <sup>9</sup>                      | AACAACCTTCCCCAACCTCT       | AGCAGCTTCAAAGTTAGTCAACA    |
| SJLGG0035            | MAP3K5 Ex.26 / Chr.6                                          | CATTTACGCTTGCATCTGA        | CTGCAGCAAGAGGCACTGTA       |
| SJLGG0035            | MAP7 Chr.8 / Chr.6                                            | CCAGGGTGTATTAGCCACAGA      | TCCACCTTCCAGCTACCATC       |
| SJLGG0031            | BRAF Ex.7 / MACF1 Ex. 19                                      | ACCACCCAATACCACAGGAA       | TTATGCAGGCTCTGAAGGTG       |
| SJLGG0031            | MACF1 Ex. 16 / BRAF Ex. 11                                    | AGCTGGTCACCTTGCCTCTA       | TCCAAATGATCCAGATCCAA       |

Under Sample ID # 'All samples screened' primers were used to screen tumor across the study cohort for each respective structural variant. Remaining primers were used to validate specific structural variants identified in specific cases, as listed. Validation was performed by sequencing in genomic DNA for samples annotated by 'g'.

## Supplementary Table 11c

*Primers used to verify full-length cDNA of FGFR1 duplications and the FGFR1-D623A mutant*

| Primer Name                | Primer Sequence           |
|----------------------------|---------------------------|
| <i>FGFR1-5'</i>            | ATGGATCCACCATGTGGAGCTGGA  |
| <i>FGFR1-3'</i>            | AGCTCGAGTCAGCGGCGTTTGCGTC |
| <i>FGFR1-ex6-forward</i>   | CCCTCTGACAAGGGCAACTA      |
| <i>FGFR1-ex9-forward</i>   | CCCCTGTACCTGGAGATCAT      |
| <i>FGFR1-ex11-reverse</i>  | GTTGGGTTTGTCTTGTCCA       |
| <i>FGFR1-ex18-forward</i>  | CATGCCCTGGACCAGTA         |
| <i>FGFR1-D623A-forward</i> | ATACACCGAGCCCTGGCAGCCA    |
| <i>FGFR1-D623A-reverse</i> | TGCCAGGGCTCGGTGTATGCA     |

## Supplementary Table 11d

### *Gene list for recurrence screening of somatic sequence variations*

| Gene Name        | Gene Accession Number |
|------------------|-----------------------|
| <i>FGFR1</i>     | NM_023110.2           |
| <i>MYB</i>       | NM_001130173.1        |
| <i>BRAF</i>      | NM_004333.4           |
| <i>RAF1</i>      | NM_002880.3           |
| <i>KRAS</i>      | NM_004985.3           |
| <i>TP53</i>      | NM_000546.4           |
| <i>PTEN</i>      | NM_000314.4           |
| <i>NEURL4</i>    | NM_000314.4           |
| <i>DSG1</i>      | NM_001942.2           |
| <i>FLT1</i>      | NM_002019.3           |
| <i>NSMAF</i>     | NM_003580.3           |
| <i>PRIC285</i>   | NM_001037335.2        |
| <i>EP300</i>     | NM_001429.3           |
| <i>ATRX</i>      | NM_000489.3           |
| <i>MAML2</i>     | NM_032427.1           |
| <i>QKI</i>       | NM_006775.2           |
| <i>NF1</i>       | NM_000267.1           |
| <i>MYBL1</i>     | NM_001080416.2        |
| <i>FXR1</i>      | NM_005087.3           |
| <i>TFDP1</i>     | NM_007111.4           |
| <i>FGFR2</i>     | NM_022970             |
| <i>FGFR3</i>     | NM_001163213          |
| <i>CIC</i>       | NM_015125             |
| <i>CDK13</i>     | NM_003718             |
| <i>STYK1</i>     | NM_018423             |
| <i>CHD2</i>      | NM_001271             |
| <i>BAI3</i>      | NM_001704             |
| <i>ADAMTS9</i>   | NM_182920             |
| <i>LETM1</i>     | NM_012318             |
| <i>DCTN1</i>     | NM_004082             |
| <i>SPHK1</i>     | NM_021972             |
| <i>TMPRSS11D</i> | NM_004262             |

## Supplementary Table 11e

### *iFISH probes*

| Gene Name          | Purpose                 | BAC(s)                     | Control probe BAC(s)      |
|--------------------|-------------------------|----------------------------|---------------------------|
| <i>FGFR1</i>       | Copy number abnormality | RP11-148D21                | RP11-962B15 & RP11-803N20 |
| <i>FGFR1</i>       | Fusion (break apart)    | RP11-246A12 & RP11-118H9   |                           |
| <i>MYB</i>         | Fusion (break apart)    | RP11-63K22 and RP11-170P19 |                           |
| <i>MYB-PCDHGA1</i> | Fusion                  | RP11-203P20 & RP11-96J7    |                           |
| <i>MYB-QKI</i>     | Fusion                  | RP11-1054F19 & RP11-944B14 |                           |
| <i>MYB-MAML2</i>   | Fusion                  | RP11-13L14 & 77A22         |                           |
| <i>MYB-ESR1</i>    | Fusion                  | RP11-665K24 & RP11-485E20  |                           |
| <i>BRAF</i>        | Fusion (break apart)    | RP11-837G3 & RP11-948O19   |                           |
| <i>ETV6</i>        | Fusion (break apart)    | RP11-297N18 & RP11-265F21  |                           |
| <i>FXR1</i>        | Fusion (break apart)    | CTD-2549I21 & RP11-1115J16 |                           |
| <i>MACF1</i>       | Fusion (break apart)    | RP11-15J6 & RP11-445L12    |                           |
| <i>MYBL1</i>       | Fusion (break apart)    | RP11-110J18 & RP11-117K19  |                           |
| <i>MYBL2</i>       | Fusion (break apart)    | RP11-35G1 & CTC-820M21     |                           |
| <i>NTRK3</i>       | Fusion (break apart)    | RP11-96B23 & PR11-948I15   |                           |
| <i>RAF1</i>        | Fusion (break apart)    | RP11-767C1 & RP11-455K5    |                           |
| <i>ST6GAL1</i>     | Fusion (break apart)    | RP11-358N22 & RP11-1012P8  |                           |
| <i>WHSC1</i>       | Fusion (break apart)    | CTD-2309G22 & RP11-21N18   |                           |



## Supplementary Note

### *Capture validation of SNVs in 16 tumors analyzed by WGS*

WGS analysis of 16 tumors (SJLGG001-016) predicted a total of 3,546 putative SNVs (tiers 1-3). A custom capture array was designed to enrich each target site for Illumina sequencing of tumor DNA and normal DNA, in order to validate the presence of the non-reference allele and to confirm its somatic origin, i.e. absence of the non-reference allele in matching germline <sup>1</sup>.

After mapping the reads to the reference genome, 36% of the target sites either failed in custom capture design or lacked sufficient coverage to determine whether a target variant was somatic or germline. Of the 2,283 sites with sufficient coverage in custom capture (101x average coverage), 716 were classified as a high quality (HQ) somatic variant and 1,567 were classified as a low quality (LQ) somatic variant by WGS analysis using a quality classification matrix, as previously described <sup>1</sup>. Of 716 WGS HQ variants, 584 were validated as somatic mutations, at an overall validation rate of 82%, while only 22 WGS LQ variants were validated as somatic mutations, at an overall validation rate of 1%. These results show that only a very small fraction (3.7%) of validated somatic mutations were derived from LQ variants, despite an extensive validation assay targeting 1,567 LQ variants.

### *Analysis of background mutation rate (BMR) in 39 WGS cases*

Mutations (tiers 1-3) that had been experimentally validated or classified as HQ variants by WGS were selected for BMR analysis. Since capture validation had been undertaken for tumors SJLGG001-016, almost all somatic variants (97.5%) used for calculating BMR in these tumors had been experimentally validated. We obtained the total number of effectively covered bases (i.e. depth >10x in both tumor and matching normal samples) in tiers 1, 2 and 3 for each case. The BMR for the 16 tumors subjected to exhaustive capture validation, ranging from  $6.52 \times 10^{-9}$  in sample SJLGG006 to  $1.38 \times 10^{-7}$  in sample SJLGG008 (Supplementary Table 2), was very similar to the BMR ascertained from validated tier 1 mutations and HQ mutations (tiers 2,3) in remaining tumors, which ranged from  $3.21 \times 10^{-9}$  to  $1.73 \times 10^{-7}$ .

### *Analysis of 7 LGG samples by both whole-genome and whole exome sequencing*

To assess potential false negative calls caused by insufficient coverage, we ran whole exome sequencing (WES) at a high coverage (245x average coverage) for 7 pairs of matching tumor DNA / normal DNA samples previously analyzed by WGS. Samples SJLGG005, SJLGG035, SJLGG036, SJLGG037 and SJLGG039 were sequenced at the UK Wellcome Trust high-throughput genomics center at an average coverage of 303-343x, while samples SJLGG008 and SJLGG030 were sequenced at BGI with an average coverage of 38x and 63x, respectively. Resulting data are presented in Supplementary Table 3.

WGS had identified a total of 13 experimentally validated somatic coding mutations in these 7 samples (Supplementary Table 3). WES detected two additional somatic SNVs (*RANBP6*<sup>P917L</sup> in SJLGG005 and *ALDH18A1*<sup>I153V</sup> in SJLGG030) that were missed by WGS. On the other hand, WES missed three validated coding variants detected by WGS (*CACNA1A*<sup>Y1446Y</sup> in SJLGG005, *MUC4*<sup>F4995F</sup> and *CDH13*<sup>V16\_E2splice\_region</sup> in SJLGG008). The two SNVs missed by WGS analysis had >40x read coverage, but the mutant alleles were present in 11-13% of the NGS reads, suggesting that they are likely to be subclonal. By contrast, the 3 SNVs missed by WES were caused by poor coverage (0-6x).

### *Complex SVs in four cerebral tumors*

Of the 13 SVs in SJLGG038, two are reciprocal chr4-chr12 translocations producing in-frame fusion proteins, *ETV6-NTRK3* and *NTRK3-ETV6*. This fusion has the same structure as those first reported in congenital fibrosarcoma; it has both the capacity to transform and to activate the MAPK/ERK and PI3K pathways<sup>2,3</sup>. Remaining SVs are all on chromosome 9, where each SV breakpoint is the end point of one of ten chromosome 9 CNV segments (Supplementary Fig. 15). In SJLGG033, five SVs detected across a 21.5Mb region on chromosome 8q showed a different pattern, disrupting *MYBL1* and forming a 'closed chain' of chromosomal breakage / rejoining with no concomitant CNV (Supplementary Fig. 9). A similar pattern has previously been reported in prostate cancer<sup>4</sup>. Four SVs in SJLGG035 formed a 1.1Mb episome that consisted of two segments on chromosome 6 encompassing *MYB* and one segment on chromosome 8 (Supplementary Fig. 10).

### Gene expression profiling of LGG tumors

Gene expression profiling was performed using Affymetrix U133 plus 2 microarrays and mRNA-seq.

Tumors (n=75) assessed on U133 plus 2 microarrays consisted of 55 with *BRAF* alterations, 8 with *MYB* rearrangement and 12 with *FGFR1* abnormalities. Robust Multi-array Average scores were used to normalize and to estimate expression levels. Using R package WGCNA and the top 10% most variable probesets, hierarchical clustering identified two major groups, each containing two subgroups (Supplementary Figure 14a). The first group consists exclusively of supratentorial non-pilocytic tumors with *FGFR1* or *MYB* abnormalities and divides into two subgroups (G1 & G2) that contain the tumors with *FGFR1* alterations (G1) or those with *MYB* rearrangements (G2). The second group includes all tumors with *BRAF* alterations and four tumors with *FGFR1* aberrations and also divides into two subgroups (G3 & G4). The four subgroups show significant enrichment with genetic alteration and pathological classification (pilocytic versus non-pilocytic tumors), but not gender (Supplementary Figure 14b). While the array data indicate that tumors cluster according to genetic alteration, pathology and anatomic site, because of strong associations between these variables, the first group of solely supratentorial tumors with non-pilocytic pathology clearly divides according to genotype into subgroups G1 and G2.

RNA-seq was carried out on 44 tumors, 16 with *BRAF* alterations, 9 with *MYB* or *MYBL1* rearrangement, 14 with *FGFR1* or *FGFR3* abnormalities, and 5 with miscellaneous genetic alterations. Average coverage of each exon was extracted from the BAM files and normalized by quantile normalization<sup>1</sup>. Hierarchical clustering using the 10% most variable exons revealed three subgroups designated G1, G2 and G3 in Supplementary Figure 14c. Significant enrichment of *BRAF* alterations, *MYB* / *MYBL1* rearrangements and *FGFR* aberrations was found in G1, G2 and G3, respectively. G1 was also found to have significant enrichment for pilocytic morphology, while no association was found with gender (Supplementary Figure 14d).

## Supplementary References

1. Zhang, J. *et al.* A novel retinoblastoma therapy from genomic and epigenetic analyses. *Nature* 481, 329-34 (2012).
2. Tognon, C. *et al.* Expression of the ETV6-NTRK3 gene fusion as a primary event in human secretory breast carcinoma. *Cancer Cell* 2, 367-76 (2002).
3. Wai, D.H. *et al.* The ETV6-NTRK3 gene fusion encodes a chimeric protein tyrosine kinase that transforms NIH3T3 cells. *Oncogene* 19, 906-15 (2000).
4. Berger, M.F. *et al.* The genomic complexity of primary human prostate cancer. *Nature* 470, 214-20 (2011).
